# Supplementary material for: Construction of a Transcriptome-Driven Network at the Early Stage of Infection with Influenza A H1N1 in Human Lung Alveolar Epithelial Cells
Source: PubMed Central journal article supplement — Biomol Ther (Seoul). 2018 Feb 5;26(3):290–7. doi: 10.4062/biomolther.2017.240 (PMC5933896; doi:10.4062/biomolther.2017.240), 2018-02-05
Supplement: bt-26-290_suppl.pdf [file bt-26-290_suppl.pdf]

**Construction of a transcriptome-driven network at the early stage of  
infection with influenza A H1N1 in human lung alveolar epithelial cells**

**Supplementary Figure**

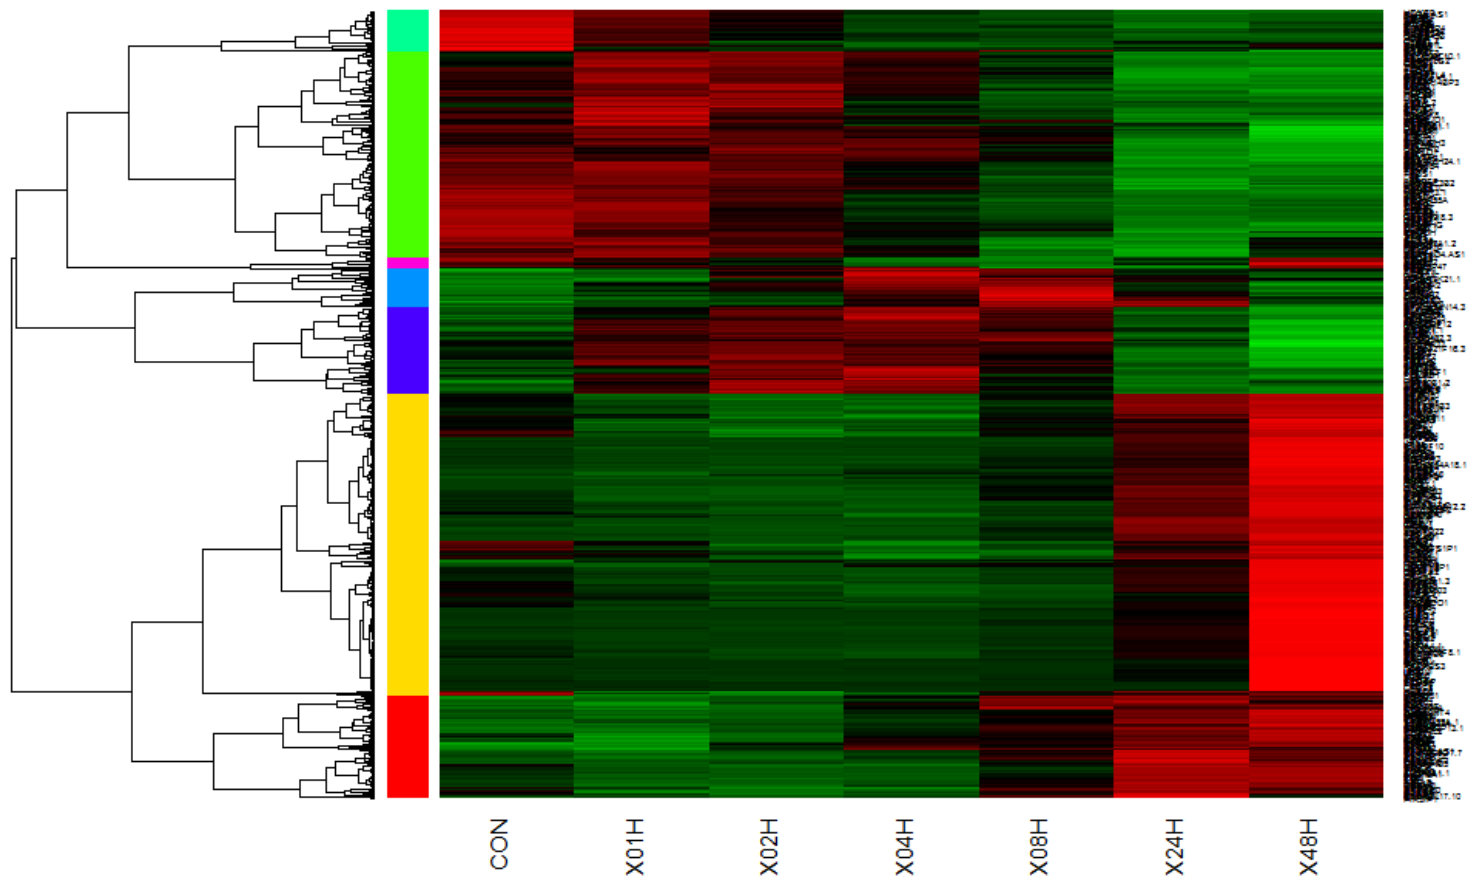

**Supplemental Figure 1. Time-series Gene Expression hierarchical clustering. Clearly two groups are divided.**

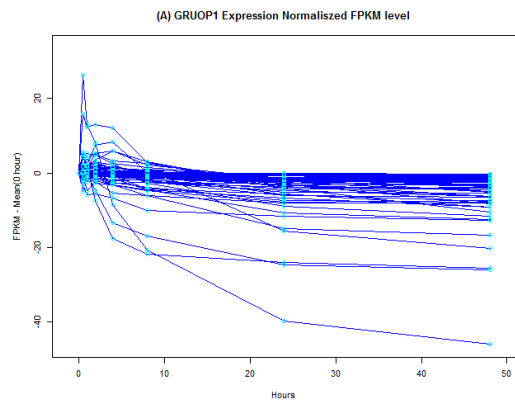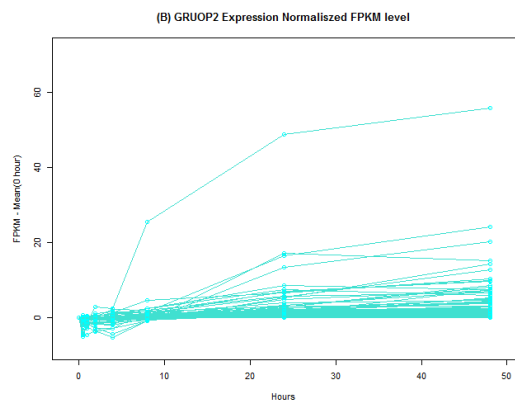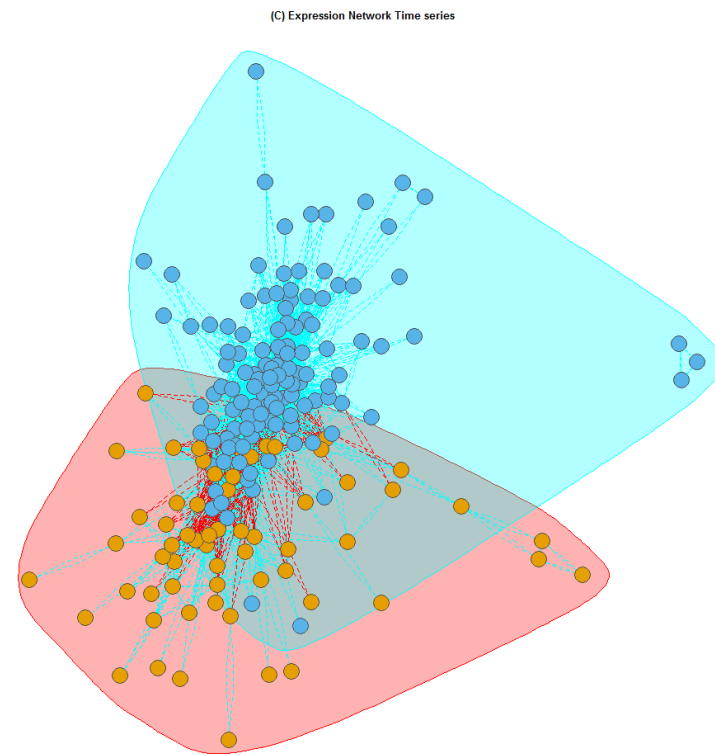

**Supplemental Figure 2. Visualization of differential expression gene sets (DEGs) of non-coding RNA in the two groups.**

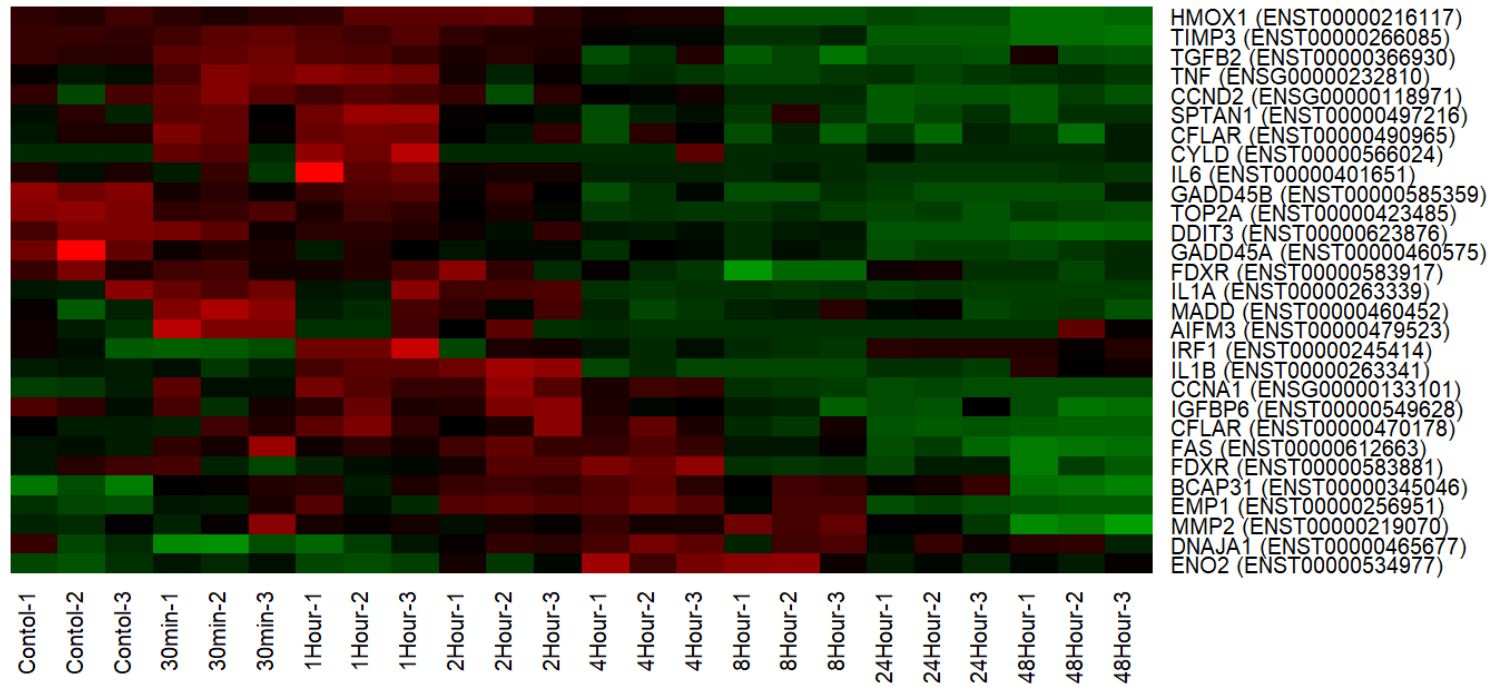

Supplemental Figure 3. Genes mediating programmed cell death (apoptosis).

(A) Glycoprotein Gp120 downregulates

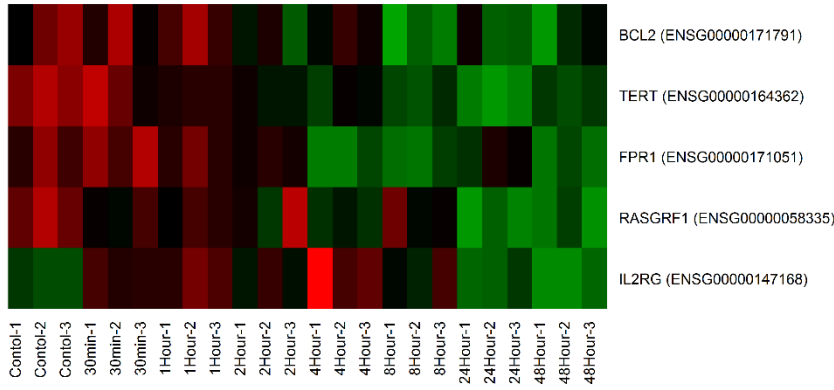

(B) UDP related genes

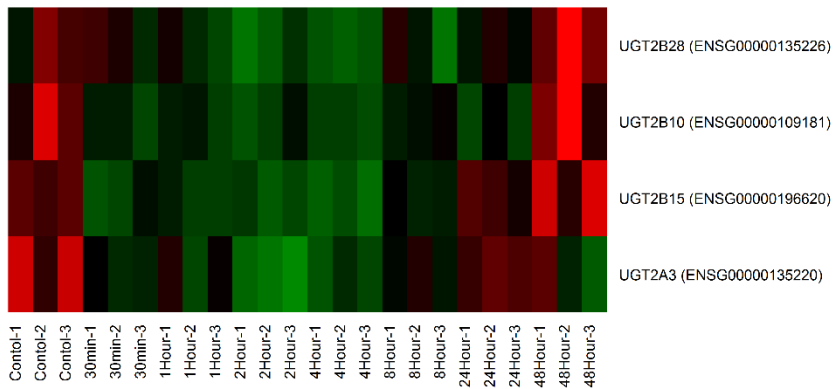

(C) CYP related genes

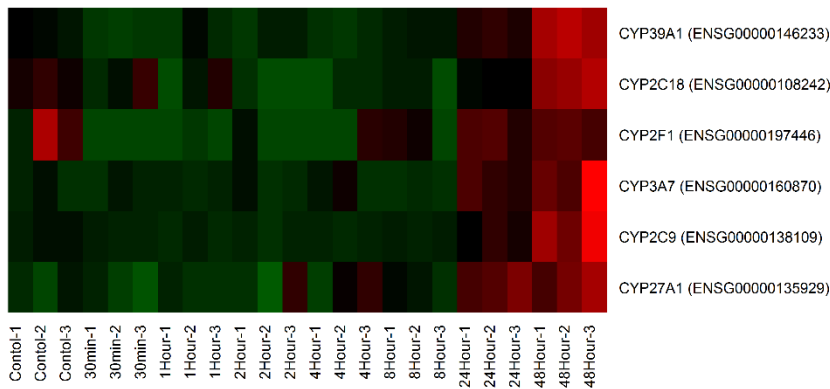

**Supplemental Figure 4. Expression patterns of gp120 and two categories DMEs; (A) Identification of related gene sets in the Gp120-regulated category on the RNA-seq; green, decrease in gene expression; red, increase**

in gene expression. The vertical axis corresponds to the sample increase time, and the horizontal axis to the gene list of 'env:Envelope surface glycoprotein Gp120 downregulates' by DAVID enrichments analysis. (B) Identification of related gene sets in UDP glycosyltransferases on the RNA-seq. (C) Identification of related gene sets in cytochrome P450 on the RNA-seq. The expression of CYP39A1 (P-value = 3.55E-11) decreased rapidly over the entire research period. Cytochrome P450 family 39 catalyzes many reactions involved in drug metabolism and synthesis of cholesterol, steroids, and other lipids. This endoplasmic reticulum protein is involved in the conversion of cholesterol to bile acids. Its substrates include the oxysterols 25-hydroxycholesterol, 27-hydroxycholesterol, and 24-hydroxycholesterol (Lorbek et al., 2012; Nicholson et al., 1998). CYP26A1 (P-value=6.14E-08) is a heme-containing enzyme responsible for metabolizing all-trans retinoic acid (at-RA) hydroxylase (Foti et al., 2016). CYP27A1 (P-value=0.0005) oxidizes cholesterol intermediates as part of the bile synthesis pathway. Since the conversion of cholesterol to bile acids is the major route for removing cholesterol from the body, this protein is important for overall cholesterol homeostasis.

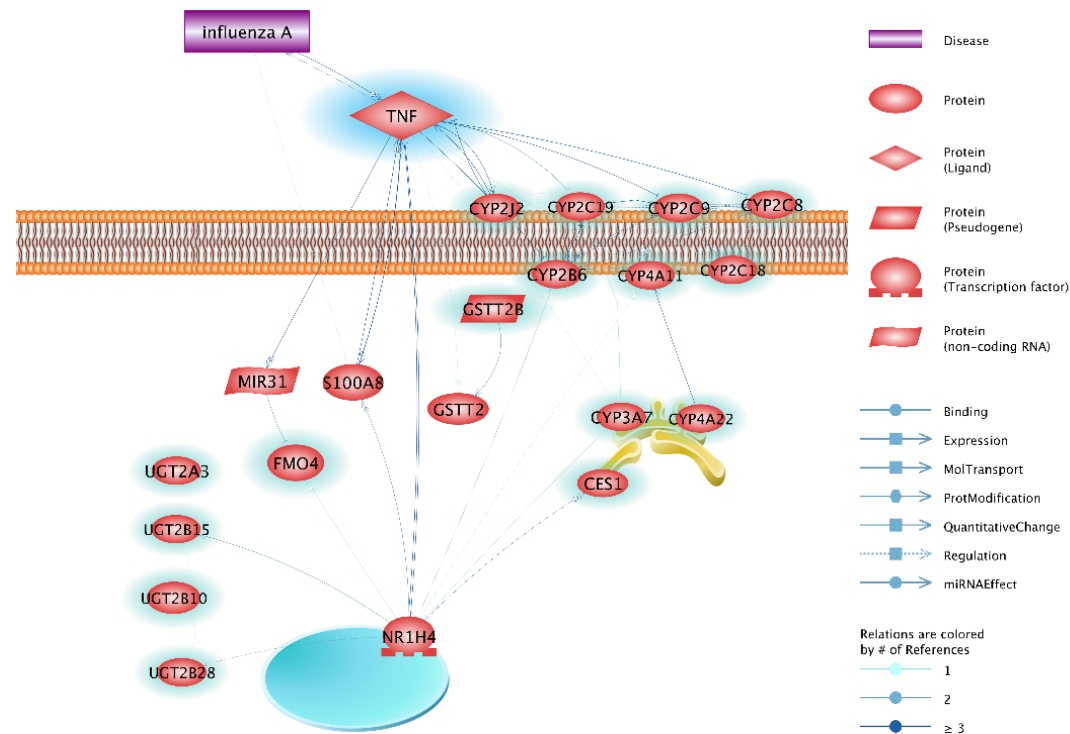

**Supplemental Figure 5.** The reconstruction signaling and regulatory network of DMEs pathway at an early stage.

(A) Schema of drug metabolizing enzyme (DME)–regulated pathways in influenza–infected cells. The genes highlighted in cyan are those related to the “UGT family” and “cytochrome p450” according to the enrichment gene analysis. The remaining genes were identified through network analysis (PATHWAY studio). All genes in Figure.

## Reference

Foti, R. S., Isoherranen, N., Zelter, A., Dickmann, L. J., Buttrick, B. R., Diaz, P. and Douguet, D. (2016). Identification of Tazarotenic Acid as the First Xenobiotic Substrate of Human Retinoic Acid Hydroxylase CYP26A1 and CYP26B1. *The Journal of pharmacology and experimental therapeutics* **357**, 281-292.

Lorbek, G., Lewinska, M. and Rozman, D. (2012). Cytochrome P450s in the synthesis of cholesterol and bile acids--from mouse models to human diseases. *The FEBS journal* **279**, 1516-1533.

Nicholson, K. G., Webster, R. G. and Hay, A. J. (1998). Textbook of Influenza. Blackwell Science.



Supplemental Table 1. Result list of Ballgown (Genes)

| ensembl ID      | pval     | qval     | SD          | GENE_SYMBOL  | GENE_DESC                                                                     |
|-----------------|----------|----------|-------------|--------------|-------------------------------------------------------------------------------|
| ENSG00000128262 | 7.11E-15 | 4.99E-12 | 0.207962017 | POM121L9P    | POM121 transmembrane nucleoporin-like 9, pseudogene                           |
| ENSG00000099998 | 3.59E-14 | 1.78E-11 | 0.312566934 | GGT5         | gamma-glutamyltransferase 5                                                   |
| ENSG00000115112 | 1.19E-13 | 4.56E-11 | 0.145640619 | TFCP2L1      | transcription factor CP2-like 1                                               |
| ENSG00000197561 | 1.25E-13 | 4.70E-11 | 0.440952604 | ELANE        | elastase, neutrophil expressed                                                |
| ENSG00000006611 | 5.66E-13 | 1.40E-10 | 0.208272942 | USH1C        | Usher syndrome 1C                                                             |
| ENSG00000110436 | 9.59E-13 | 2.12E-10 | 0.065089946 | SLC1A2       | solute carrier family 1 (glial high affinity glutamate transporter), member 2 |
| ENSG00000280953 | 4.67E-12 | 7.32E-10 | 0.002656927 | LINC01163    | long intergenic non-protein coding RNA 1163                                   |
| ENSG00000054179 | 1.25E-11 | 1.62E-09 | 0.195440891 | ENTPD2       | ectonucleoside triphosphate diphosphohydrolase 2                              |
| ENSG00000171303 | 1.34E-11 | 1.73E-09 | 0.24596992  | KCNK3        | potassium channel, two pore domain subfamily K, member 3                      |
| ENSG00000076641 | 1.84E-11 | 2.24E-09 | 0.132919468 | PAG1         | phosphoprotein membrane anchor with glycosphingolipid microdomains 1          |
| ENSG00000147689 | 2.42E-11 | 2.79E-09 | 0.064864781 | FAM83A       | family with sequence similarity 83, member A                                  |
| ENSG00000012504 | 3.00E-11 | 3.31E-09 | 0.20953971  | NR1H4        | nuclear receptor subfamily 1, group H, member 4                               |
| ENSG00000111816 | 3.16E-11 | 3.45E-09 | 0.226073148 | FRK          | fyn-related Src family tyrosine kinase                                        |
| ENSG00000009709 | 3.44E-11 | 3.69E-09 | 0.063653179 | PAX7         | paired box 7                                                                  |
| ENSG00000146233 | 3.55E-11 | 3.79E-09 | 0.107643774 | CYP39A1      | cytochrome P450, family 39, subfamily A, polypeptide 1                        |
| ENSG00000159166 | 3.96E-11 | 4.12E-09 | 0.05350551  | LAD1         | ladinin 1                                                                     |
| ENSG00000268104 | 5.20E-11 | 5.15E-09 | 0.098147022 | SLC6A14      | solute carrier family 6 (amino acid transporter), member 14                   |
| ENSG00000173376 | 8.66E-11 | 7.94E-09 | 0.097806228 | NDNF         | neuron-derived neurotrophic factor                                            |
| ENSG00000132688 | 9.11E-11 | 8.26E-09 | 0.186738648 | NES          | nestin                                                                        |
| ENSG00000101349 | 1.08E-10 | 9.47E-09 | 0.015844128 | PAK7         | p21 protein (Cdc42/Rac)-activated kinase 7                                    |
| ENSG00000144730 | 1.37E-10 | 1.16E-08 | 0.127603252 | IL17RD       | interleukin 17 receptor D                                                     |
| ENSG00000093134 | 1.53E-10 | 1.28E-08 | 0.073972981 | VNN3         | vanin 3                                                                       |
| ENSG00000115165 | 1.78E-10 | 1.45E-08 | 0.028982316 | CYTIP        | cytohesin 1 interacting protein                                               |
| ENSG00000081138 | 2.00E-10 | 1.59E-08 | 0.026287198 | CDH7         | cadherin 7, type 2                                                            |
| ENSG00000150540 | 2.54E-10 | 1.93E-08 | 0.035629874 | HNMT         | histamine N-methyltransferase                                                 |
| ENSG00000197872 | 2.78E-10 | 2.09E-08 | 0.133795466 | FAM49A       | family with sequence similarity 49, member A                                  |
| ENSG00000173930 | 3.08E-10 | 2.28E-08 | 0.092682326 | SLCO4C1      | solute carrier organic anion transporter family, member 4C1                   |
| ENSG00000120675 | 3.78E-10 | 2.72E-08 | 0.029198016 | DNAJC15      | DnaJ (Hsp40) homolog, subfamily C, member 15                                  |
| ENSG00000183023 | 4.21E-10 | 2.94E-08 | 0.041800944 | SLC8A1       | solute carrier family 8 (sodium/calcium exchanger), member 1                  |
| ENSG00000176723 | 6.63E-10 | 4.34E-08 | 0.093998112 | ZNF843       | zinc finger protein 843                                                       |
| ENSG00000128849 | 7.86E-10 | 4.99E-08 | 0.08825828  | CGNL1        | cingulin-like 1                                                               |
| ENSG00000183186 | 8.53E-10 | 5.32E-08 | 0.167963444 | C2CD4C       | C2 calcium-dependent domain containing 4C                                     |
| ENSG00000229921 | 8.76E-10 | 5.41E-08 | 0.22976696  | KIF25-AS1    | KIF25 antisense RNA 1                                                         |
| ENSG00000120262 | 1.55E-09 | 8.64E-08 | 0.095003429 | CCDC170      | coiled-coil domain containing 170                                             |
| ENSG00000231419 | 1.64E-09 | 9.07E-08 | 0.009646384 | LINC00689    | long intergenic non-protein coding RNA 689                                    |
| ENSG00000197558 | 1.90E-09 | 1.02E-07 | 0.046766482 | SSPO         | SCO-spondin                                                                   |
| ENSG00000126882 | 2.03E-09 | 1.08E-07 | 0.105131785 | FAM78A       | family with sequence similarity 78, member A                                  |
| ENSG00000158865 | 2.13E-09 | 1.12E-07 | 0.114308565 | SLC5A11      | solute carrier family 5 (sodium/inositol cotransporter), member 11            |
| ENSG00000154188 | 2.21E-09 | 1.15E-07 | 0.067619717 | ANGPT1       | angiopoietin 1                                                                |
| ENSG00000170298 | 2.22E-09 | 1.15E-07 | 0.186611131 | LGALS9B      | lectin, galactoside-binding, soluble, 9B                                      |
| ENSG00000130829 | 2.22E-09 | 1.15E-07 | 0.228952342 | DUSP9        | dual specificity phosphatase 9                                                |
| ENSG00000138639 | 2.39E-09 | 1.23E-07 | 0.111565741 | ARHGAP24     | Rho GTPase activating protein 24                                              |
| ENSG00000103449 | 2.39E-09 | 1.23E-07 | 0.052708066 | SALL1        | spalt-like transcription factor 1                                             |
| ENSG00000052850 | 2.66E-09 | 1.34E-07 | 0.161446364 | ALX4         | ALX homeobox 4                                                                |
| ENSG00000101445 | 3.05E-09 | 1.49E-07 | 0.040036826 | PPP1R16B     | protein phosphatase 1, regulatory subunit 16B                                 |
| ENSG00000221866 | 3.18E-09 | 1.53E-07 | 0.093542416 | PLXNA4       | plexin A4                                                                     |
| ENSG00000154133 | 3.49E-09 | 1.66E-07 | 0.050290187 | ROBO4        | roundabout guidance receptor 4                                                |
| ENSG00000166446 | 3.51E-09 | 1.67E-07 | 0.165073796 | CDYL2        | chromodomain protein, Y-like 2                                                |
| ENSG00000235142 | 3.61E-09 | 1.71E-07 | 0.023224838 | LOC100422737 | uncharacterized LOC100422737                                                  |
| ENSG00000151090 | 3.82E-09 | 1.80E-07 | 0.11069643  | THRB         | thyroid hormone receptor, beta                                                |
| ENSG00000169860 | 4.12E-09 | 1.91E-07 | 0.211869667 | P2RY1        | purinergic receptor P2Y, G-protein coupled, 1                                 |
| ENSG00000102271 | 4.23E-09 | 1.96E-07 | 0.179099895 | KLHL4        | kelch-like family member 4                                                    |
| ENSG00000110002 | 4.89E-09 | 2.21E-07 | 0.110708369 | VWASA        | von Willebrand factor A domain containing 5A                                  |
| ENSG00000205978 | 5.34E-09 | 2.39E-07 | 0.04622568  | NYNRIN       | NYN domain and retroviral integrase containing                                |
| ENSG00000232810 | 5.40E-09 | 2.41E-07 | 0.134369501 | TNF          | tumor necrosis factor                                                         |
| ENSG00000176928 | 5.53E-09 | 2.46E-07 | 0.212111259 | GCNT4        | glucosaminyl (N-acetyl) transferase 4, core 2                                 |
| ENSG00000164330 | 5.72E-09 | 2.52E-07 | 0.167068951 | EBF1         | early B-cell factor 1                                                         |
| ENSG00000142700 | 5.89E-09 | 2.58E-07 | 0.104519265 | DMRTA2       | DMRT-like family A2                                                           |
| ENSG00000169562 | 7.16E-09 | 3.05E-07 | 0.047306033 | GJB1         | gap junction protein, beta 1, 32kDa                                           |
| ENSG00000162415 | 7.34E-09 | 3.11E-07 | 0.150024022 | ZSWIM5       | zinc finger, SWIM-type containing 5                                           |
| ENSG00000165244 | 7.42E-09 | 3.13E-07 | 0.153338092 | ZNF367       | zinc finger protein 367                                                       |
| ENSG00000196542 | 8.59E-09 | 3.53E-07 | 0.035944483 | SPTSSB       | serine palmitoyltransferase, small subunit B                                  |

|                 |          |          |             |            |                                                                                                              |
|-----------------|----------|----------|-------------|------------|--------------------------------------------------------------------------------------------------------------|
| ENSG00000246877 | 9.19E-09 | 3.74E-07 | 0.078532631 | DNM1P35    | dynamin 1 pseudogene 35                                                                                      |
| ENSG00000109819 | 1.07E-08 | 4.26E-07 | 0.015622717 | PPARGC1A   | peroxisome proliferator-activated receptor gamma, coactivator 1 alpha                                        |
| ENSG00000135333 | 1.09E-08 | 4.35E-07 | 0.055178244 | EPHA7      | EPH receptor A7                                                                                              |
| ENSG00000162552 | 1.15E-08 | 4.54E-07 | 0.226192254 | WNT4       | wingless-type MMTV integration site family, member 4                                                         |
| ENSG00000011465 | 1.21E-08 | 4.71E-07 | 0.020085886 | DCN        | decorin                                                                                                      |
| ENSG00000100167 | 1.24E-08 | 4.82E-07 | 0.118787323 | 4Z616      | septin 3                                                                                                     |
| ENSG00000189057 | 1.34E-08 | 5.13E-07 | 0.125332331 | FAM111B    | family with sequence similarity 111, member B                                                                |
| ENSG00000089250 | 1.47E-08 | 5.51E-07 | 0.019301233 | NOS1       | nitric oxide synthase 1 (neuronal)                                                                           |
| ENSG00000178977 | 1.91E-08 | 6.79E-07 | 0.132797173 | LINC00324  | long intergenic non-protein coding RNA 324                                                                   |
| ENSG00000167723 | 2.01E-08 | 7.10E-07 | 0.066635471 | TRPV3      | transient receptor potential cation channel, subfamily V, member 3                                           |
| ENSG00000175984 | 2.02E-08 | 7.11E-07 | 0.051013899 | DENN2C     | DENN/MADD domain containing 2C                                                                               |
| ENSG0000079482  | 2.06E-08 | 7.22E-07 | 0.138656556 | OPHN1      | oligophrenin 1                                                                                               |
| ENSG00000137507 | 2.29E-08 | 7.88E-07 | 0.07929953  | LRRC32     | leucine rich repeat containing 32                                                                            |
| ENSG00000125780 | 2.30E-08 | 7.90E-07 | 0.053277257 | TGM3       | transglutaminase 3                                                                                           |
| ENSG00000237289 | 2.47E-08 | 8.40E-07 | 0.115654904 | CKMT1B     | creatine kinase, mitochondrial 1B                                                                            |
| ENSG00000115461 | 2.83E-08 | 9.42E-07 | 0.08888194  | IGFBP5     | insulin-like growth factor binding protein 5                                                                 |
| ENSG00000168065 | 3.11E-08 | 1.02E-06 | 0.117072418 | SLC22A11   | solute carrier family 22 (organic anion/urate transporter), member 11                                        |
| ENSG00000180875 | 3.42E-08 | 1.10E-06 | 0.165832764 | GREM2      | gremlin 2, DAN family BMP antagonist                                                                         |
| ENSG00000182179 | 3.96E-08 | 1.25E-06 | 0.232419832 | UBA7       | ubiquitin-like modifier activating enzyme 7                                                                  |
| ENSG00000172771 | 4.50E-08 | 1.39E-06 | 0.073068742 | EFCAB12    | EF-hand calcium binding domain 12                                                                            |
| ENSG00000108852 | 4.75E-08 | 1.46E-06 | 0.076146079 | MPP2       | membrane protein, palmitoylated 2 (MAGUK p55 subfamily member 2)                                             |
| ENSG00000186998 | 5.10E-08 | 1.56E-06 | 0.122825872 | EMID1      | EMI domain containing 1                                                                                      |
| ENSG00000135643 | 5.17E-08 | 1.57E-06 | 0.143806596 | KCNMB4     | potassium channel subfamily M regulatory beta subunit 4                                                      |
| ENSG00000169245 | 5.21E-08 | 1.58E-06 | 0.084800595 | CXCL10     | chemokine (C-X-C motif) ligand 10                                                                            |
| ENSG00000131738 | 5.74E-08 | 1.71E-06 | 0.321625365 | KRT33B     | keratin 33B, type I                                                                                          |
| ENSG00000065413 | 5.76E-08 | 1.71E-06 | 0.040579153 | ANKRD44    | ankyrin repeat domain 44                                                                                     |
| ENSG00000095596 | 6.14E-08 | 1.80E-06 | 0.18550694  | CYP26A1    | cytochrome P450, family 26, subfamily A, polypeptide 1                                                       |
| ENSG00000184005 | 6.20E-08 | 1.81E-06 | 0.101332368 | ST6GALNAC3 | ST6 (alpha-N-acetylneuraminyl-2,3-beta-galactosyl-1,3)-N-acetylgalactosaminide alpha-2,6-sialyltransferase 3 |
| ENSG00000160588 | 6.76E-08 | 1.95E-06 | 0.149051734 | MPZL3      | myelin protein zero-like 3                                                                                   |
| ENSG00000172995 | 6.82E-08 | 1.96E-06 | 0.022730106 | ARPP21     | cAMP-regulated phosphoprotein, 21kDa                                                                         |
| ENSG00000100346 | 6.96E-08 | 2.00E-06 | 0.042180705 | CACNA11    | calcium channel, voltage-dependent, T type, alpha 11 subunit                                                 |
| ENSG00000165929 | 7.03E-08 | 2.02E-06 | 0.129943424 | TC2N       | tandem C2 domains, nuclear                                                                                   |
| ENSG00000138615 | 7.28E-08 | 2.08E-06 | 0.036953783 | CILP       | cartilage intermediate layer protein, nucleotide pyrophosphohydrolase                                        |
| ENSG00000138109 | 7.46E-08 | 2.12E-06 | 0.097664271 | CYP2C9     | cytochrome P450, family 2, subfamily C, polypeptide 9                                                        |
| ENSG00000066032 | 7.50E-08 | 2.13E-06 | 0.059129411 | CTNNA2     | catenin (cadherin-associated protein), alpha 2                                                               |
| ENSG00000149256 | 7.52E-08 | 2.14E-06 | 0.011279457 | TENM4      | teneurin transmembrane protein 4                                                                             |
| ENSG00000071991 | 7.91E-08 | 2.23E-06 | 0.036498115 | CDH19      | cadherin 19, type 2                                                                                          |
| ENSG00000115590 | 9.31E-08 | 2.57E-06 | 0.068493847 | IL1R2      | interleukin 1 receptor, type II                                                                              |
| ENSG00000128917 | 1.03E-07 | 2.81E-06 | 0.081029982 | DLL4       | delta-like 4 (Drosophila)                                                                                    |
| ENSG00000180509 | 1.15E-07 | 3.09E-06 | 0.014806034 | KCNE1      | potassium channel, voltage gated subfamily E regulatory beta subunit 1                                       |
| ENSG00000130052 | 1.17E-07 | 3.13E-06 | 0.035852442 | STARD8     | StAR-related lipid transfer (START) domain containing 8                                                      |
| ENSG00000095303 | 1.17E-07 | 3.14E-06 | 0.050730557 | PTGS1      | prostaglandin-endoperoxide synthase 1 (prostaglandin G/H synthase and cyclooxygenase)                        |
| ENSG00000165887 | 1.18E-07 | 3.15E-06 | 0.22145593  | ANKRD2     | ankyrin repeat domain 2 (stretch responsive muscle)                                                          |
| ENSG00000269502 | 1.18E-07 | 3.16E-06 | 0.02821564  | DMRTC1     | DMRT-like family C1                                                                                          |
| ENSG00000154493 | 1.20E-07 | 3.19E-06 | 0.043789534 | C10orf90   | chromosome 10 open reading frame 90                                                                          |
| ENSG00000152217 | 1.22E-07 | 3.24E-06 | 0.055822129 | SETBP1     | SET binding protein 1                                                                                        |
| ENSG00000151150 | 1.23E-07 | 3.26E-06 | 0.019328283 | ANK3       | ankyrin 3, node of Ranvier (ankyrin G)                                                                       |
| ENSG00000245105 | 1.27E-07 | 3.34E-06 | 0.196904486 | A2M-AS1    | A2M antisense RNA 1 (head to head)                                                                           |
| ENSG00000101463 | 1.37E-07 | 3.55E-06 | 0.156371044 | SYNDIG1    | synapse differentiation inducing 1                                                                           |
| ENSG00000124256 | 1.41E-07 | 3.66E-06 | 0.040849488 | ZBP1       | Z-DNA binding protein 1                                                                                      |
| ENSG00000171916 | 1.43E-07 | 3.70E-06 | 0.044956043 | LGALS9B    | lectin, galactoside-binding, soluble, 9B                                                                     |
| ENSG00000153822 | 1.43E-07 | 3.70E-06 | 0.073804953 | KCNJ16     | potassium channel, inwardly rectifying subfamily J, member 16                                                |
| ENSG00000150471 | 1.50E-07 | 3.83E-06 | 0.027046805 | ADGRL3     | adhesion G protein-coupled receptor L3                                                                       |
| ENSG00000138316 | 1.51E-07 | 3.85E-06 | 0.071280932 | ADAMTS14   | ADAM metalloproteinase with thrombospondin type 1 motif, 14                                                  |
| ENSG00000064886 | 1.79E-07 | 4.46E-06 | 0.031741628 | CHI3L2     | chitinase 3-like 2                                                                                           |
| ENSG00000128268 | 2.00E-07 | 4.92E-06 | 0.042225373 | MGAT3      | mannosyl (beta-1,4)-glycoprotein beta-1,4-N-acetylglucosaminyltransferase                                    |
| ENSG00000171872 | 2.08E-07 | 5.06E-06 | 0.045183362 | KLF17      | Kruppel-like factor 17                                                                                       |
| ENSG00000047365 | 2.17E-07 | 5.25E-06 | 0.050147639 | ARAP2      | ArfGAP with RhoGAP domain, ankyrin repeat and PH domain 2                                                    |
| ENSG00000164989 | 2.50E-07 | 5.92E-06 | 0.036084698 | CCDC171    | coiled-coil domain containing 171                                                                            |
| ENSG00000115602 | 2.68E-07 | 6.29E-06 | 0.023788417 | IL1RL1     | interleukin 1 receptor-like 1                                                                                |
| ENSG00000102387 | 3.00E-07 | 6.93E-06 | 0.149503142 | TAF7L      | TAF7-like RNA polymerase II, TATA box binding protein (TBP)-associated factor, 50kDa                         |
| ENSG00000183508 | 3.13E-07 | 7.16E-06 | 0.084237226 | FAM46C     | family with sequence similarity 46, member C                                                                 |
| ENSG00000008277 | 3.14E-07 | 7.17E-06 | 0.05399062  | ADAM22     | ADAM metalloproteinase domain 22                                                                             |
| ENSG00000164418 | 3.50E-07 | 7.89E-06 | 0.076518642 | GRIK2      | glutamate receptor, ionotropic, kainate 2                                                                    |
| ENSG00000196605 | 3.68E-07 | 8.20E-06 | 0.120632891 | ZNF846     |                                                                                                              |

|                 |          |          |             |              |                                                                           |
|-----------------|----------|----------|-------------|--------------|---------------------------------------------------------------------------|
| ENSG00000147614 | 3.74E-07 | 8.31E-06 | 0.094383174 | ATP6V0D2     | ATPase, H+ transporting, lysosomal 38kDa, V0 subunit d2                   |
| ENSG00000117148 | 3.80E-07 | 8.44E-06 | 0.238090834 | ACTL8        | actin-like 8                                                              |
| ENSG00000253882 | 3.83E-07 | 8.50E-06 | 0.10106545  | LOC154761    | family with sequence similarity 115, member C pseudogene                  |
| ENSG00000121743 | 3.91E-07 | 8.64E-06 | 0.071218613 | GJA3         | gap junction protein, alpha 3, 46kDa                                      |
| ENSG00000127152 | 3.93E-07 | 8.69E-06 | 0.113923721 | BCL11B       | B-cell CLL/lymphoma 11B (zinc finger protein)                             |
| ENSG00000206585 | 3.98E-07 | 8.76E-06 | 0.276472029 | RNVU1-7      | RNA, variant U1 small nuclear 7                                           |
| ENSG00000152128 | 4.17E-07 | 9.12E-06 | 0.030906507 | TMEM163      | transmembrane protein 163                                                 |
| ENSG00000133135 | 4.48E-07 | 9.68E-06 | 0.06726596  | RNF128       | ring finger protein 128, E3 ubiquitin protein ligase                      |
| ENSG00000163207 | 4.74E-07 | 1.02E-05 | 0.089845948 | IVL          | involucrin                                                                |
| ENSG00000197110 | 5.33E-07 | 1.12E-05 | 0.112718262 | IFNL3        | interferon, lambda 3                                                      |
| ENSG00000144481 | 5.62E-07 | 1.17E-05 | 0.02056143  | TRPM8        | transient receptor potential cation channel, subfamily M, member 8        |
| ENSG00000160716 | 5.66E-07 | 1.18E-05 | 0.098538754 | CHRNB2       | cholinergic receptor, nicotinic, beta 2 (neuronal)                        |
| ENSG00000073737 | 5.66E-07 | 1.18E-05 | 0.079247094 | DHRS9        | dehydrogenase/reductase (SDR family) member 9                             |
| ENSG00000100968 | 5.80E-07 | 1.20E-05 | 0.020828291 | NFATC4       | nuclear factor of activated T-cells, cytoplasmic, calcineurin-dependent 4 |
| ENSG00000187688 | 5.94E-07 | 1.23E-05 | 0.132031024 | TRPV2        | transient receptor potential cation channel, subfamily V, member 2        |
| ENSG00000168918 | 5.99E-07 | 1.24E-05 | 0.067498765 | INPP5D       | inositol polyphosphate-5-phosphatase D                                    |
| ENSG00000159588 | 6.07E-07 | 1.25E-05 | 0.201176655 | CCDC17       | coiled-coil domain containing 17                                          |
| ENSG00000143355 | 6.14E-07 | 1.26E-05 | 0.044999735 | LHX9         | LIM homeobox 9                                                            |
| ENSG00000170153 | 6.28E-07 | 1.29E-05 | 0.071777776 | RNF150       | ring finger protein 150                                                   |
| ENSG00000140451 | 6.49E-07 | 1.32E-05 | 0.166137096 | PIF1         | PIF1 5'-to-3' DNA helicase                                                |
| ENSG00000091428 | 6.57E-07 | 1.33E-05 | 0.023914083 | RAPGEF4      | Rap guanine nucleotide exchange factor (GEF) 4                            |
| ENSG00000165923 | 6.65E-07 | 1.35E-05 | 0.138496451 | AGBL2        | ATP/GTP binding protein-like 2                                            |
| ENSG00000106560 | 6.68E-07 | 1.35E-05 | 0.0858168   | GIMAP2       | GTPase, IMAP family member 2                                              |
| ENSG00000106789 | 6.82E-07 | 1.38E-05 | 0.167731389 | CORO2A       | coronin, actin binding protein, 2A                                        |
| ENSG00000184911 | 7.01E-07 | 1.41E-05 | 0.033215985 | DMRTC1B      | DMRT-like family C1B                                                      |
| ENSG00000186226 | 7.77E-07 | 1.54E-05 | 0.089851216 | LCE1E        | late cornified envelope 1E                                                |
| ENSG00000164488 | 7.78E-07 | 1.54E-05 | 0.068147986 | DACT2        | dishevelled-binding antagonist of beta-catenin 2                          |
| ENSG00000080573 | 7.91E-07 | 1.57E-05 | 0.171341853 | COL5A3       | collagen, type V, alpha 3                                                 |
| ENSG00000236366 | 8.21E-07 | 1.61E-05 | 0.032584373 | LOC153910    | uncharacterized LOC153910                                                 |
| ENSG00000173077 | 8.23E-07 | 1.62E-05 | 0.06695456  | 42705        | deleted in esophageal cancer 1                                            |
| ENSG00000197748 | 8.28E-07 | 1.62E-05 | 0.040599622 | CFAP43       | cilia and flagella associated protein 43                                  |
| ENSG00000236714 | 8.76E-07 | 1.70E-05 | 0.039804612 | LOC101926975 | uncharacterized LOC101926975                                              |
| ENSG00000180730 | 8.79E-07 | 1.70E-05 | 0.062563456 | SHISA2       | shisa family member 2                                                     |
| ENSG00000269313 | 8.94E-07 | 1.73E-05 | 0.048513232 | MAGIX        | MAGI family member, X-linked                                              |
| ENSG00000106689 | 9.19E-07 | 1.76E-05 | 0.123843133 | LHX2         | LIM homeobox 2                                                            |
| ENSG00000006747 | 9.29E-07 | 1.78E-05 | 0.018209122 | SCIN         | scinderin                                                                 |
| ENSG00000159625 | 9.44E-07 | 1.80E-05 | 0.027282401 | DRC7         | dynein regulatory complex subunit 7                                       |
| ENSG00000184675 | 1.00E-06 | 1.89E-05 | 0.105095581 | AMER1        | APC membrane recruitment protein 1                                        |
| ENSG00000148735 | 1.11E-06 | 2.06E-05 | 0.014632719 | PLEKHS1      | pleckstrin homology domain containing, family S member 1                  |
| ENSG00000227640 | 1.15E-06 | 2.11E-05 | 0.063614951 | SOX21-AS1    | SOX21 antisense RNA 1 (head to head)                                      |
| ENSG00000213417 | 1.18E-06 | 2.17E-05 | 0.102830885 | KRTAP2-4     | keratin associated protein 2-4                                            |
| ENSG00000134317 | 1.29E-06 | 2.35E-05 | 0.039266323 | GRHL1        | grainyhead-like transcription factor 1                                    |
| ENSG00000138606 | 1.32E-06 | 2.39E-05 | 0.145639577 | SHF          | Src homology 2 domain containing F                                        |
| ENSG00000114251 | 1.33E-06 | 2.40E-05 | 0.090846815 | WNT5A        | wingless-type MMTV integration site family, member 5A                     |
| ENSG00000189275 | 1.37E-06 | 2.47E-05 | 0.05965797  | LINC01164    | long intergenic non-protein coding RNA 1164                               |
| ENSG00000153012 | 1.38E-06 | 2.48E-05 | 0.021615986 | LG12         | leucine-rich repeat LGI family, member 2                                  |
| ENSG00000064300 | 1.44E-06 | 2.58E-05 | 0.143348169 | NGFR         | nerve growth factor receptor                                              |
| ENSG00000006210 | 1.44E-06 | 2.58E-05 | 0.058222973 | CX3CL1       | chemokine (C-X3-C motif) ligand 1                                         |
| ENSG00000227258 | 1.45E-06 | 2.59E-05 | 0.199902224 | SMIM2-AS1    | SMIM2 antisense RNA 1                                                     |
| ENSG00000256340 | 1.48E-06 | 2.64E-05 | 0.056400924 | ABCC6P1      | ATP-binding cassette, sub-family C, member 6 pseudogene 1 (functional)    |
| ENSG00000183908 | 1.55E-06 | 2.74E-05 | 0.015440176 | LRRC55       | leucine rich repeat containing 55                                         |
| ENSG00000133106 | 1.55E-06 | 2.75E-05 | 0.095805356 | EPST11       | epithelial stromal interaction 1 (breast)                                 |
| ENSG00000099985 | 1.56E-06 | 2.76E-05 | 0.065183663 | OSM          | oncostatin M                                                              |
| ENSG00000068831 | 1.59E-06 | 2.81E-05 | 0.073148324 | RASGRP2      | RAS guanyl releasing protein 2 (calcium and DAG-regulated)                |
| ENSG00000204291 | 1.63E-06 | 2.86E-05 | 0.098030201 | COL15A1      | collagen, type XV, alpha 1                                                |
| ENSG00000112379 | 1.71E-06 | 2.98E-05 | 0.070888309 | ARFGEF3      | ARFGEF family member 3                                                    |
| ENSG00000235750 | 1.72E-06 | 2.99E-05 | 0.030906426 | KIAA0040     | KIAA0040                                                                  |
| ENSG00000179914 | 1.83E-06 | 3.15E-05 | 0.047613294 | ITLN1        | intelectin 1 (galactofuranose binding)                                    |
| ENSG00000137812 | 1.83E-06 | 3.16E-05 | 0.071181925 | CASC5        | cancer susceptibility candidate 5                                         |
| ENSG00000224805 | 1.89E-06 | 3.25E-05 | 0.246738241 | LINC00853    | long intergenic non-protein coding RNA 853                                |
| ENSG00000050438 | 1.90E-06 | 3.26E-05 | 0.020141897 | SLC4A8       | solute carrier family 4, sodium bicarbonate cotransporter, member 8       |
| ENSG00000148702 | 1.93E-06 | 3.30E-05 | 0.182440554 | HABP2        | hyaluronan binding protein 2                                              |
| ENSG00000085552 | 1.94E-06 | 3.32E-05 | 0.04143977  | IGSF9        | immunoglobulin superfamily, member 9                                      |
| ENSG00000056487 | 2.02E-06 | 3.43E-05 | 0.070205525 | PHF21B       | PHD finger protein 21B                                                    |
| ENSG00000117016 | 2.13E-06 | 3.58E-05 | 0.103263899 | RIMS3        | regulating synaptic membrane exocytosis 3                                 |

|                 |          |             |             |              |                                                                                                               |
|-----------------|----------|-------------|-------------|--------------|---------------------------------------------------------------------------------------------------------------|
| ENSG00000131477 | 2.17E-06 | 3.64E-05    | 0.102531231 | RAMP2        | receptor (G protein-coupled) activity modifying protein 2                                                     |
| ENSG00000164684 | 2.22E-06 | 3.71E-05    | 0.020009506 | ZNF704       | zinc finger protein 704                                                                                       |
| ENSG00000141854 | 2.25E-06 | 3.75E-05    | 0.408513544 | LOC113230    | uncharacterized protein LOC113230                                                                             |
| ENSG00000273706 | 2.29E-06 | 3.81E-05    | 0.106194794 | LHX1         | LIM homeobox 1                                                                                                |
| ENSG00000137752 | 2.40E-06 | 3.97E-05    | 0.068219387 | CASP1        | caspase 1, apoptosis-related cysteine peptidase                                                               |
| ENSG00000185304 | 2.48E-06 | 4.08E-05    | 0.032587647 | RGPD2        | RANBP2-like and GRIP domain containing 2                                                                      |
| ENSG00000176533 | 2.50E-06 | 4.11E-05    | 0.048193713 | GNG7         | guanine nucleotide binding protein (G protein), gamma 7                                                       |
| ENSG00000140937 | 2.52E-06 | 4.13E-05    | 0.042013239 | CDH11        | cadherin 11, type 2, OB-cadherin (osteoblast)                                                                 |
| ENSG00000007968 | 2.53E-06 | 4.15E-05    | 0.050208149 | E2F2         | E2F transcription factor 2                                                                                    |
| ENSG00000078725 | 2.60E-06 | 4.26E-05    | 0.074582965 | BRINP1       | bone morphogenetic protein/retinoic acid inducible neural-specific 1                                          |
| ENSG00000149212 | 2.61E-06 | 4.27E-05    | 0.050217149 | SESN3        | sestrin 3                                                                                                     |
| ENSG00000184731 | 2.85E-06 | 4.61E-05    | 0.053872996 | FAM110C      | family with sequence similarity 110, member C                                                                 |
| ENSG00000135378 | 2.87E-06 | 4.63E-05    | 0.056928072 | PRRG4        | proline rich Gla (G-carboxyglutamic acid) 4 (transmembrane)                                                   |
| ENSG00000112303 | 3.10E-06 | 4.94E-05    | 0.150875828 | VNN2         | vanin 2                                                                                                       |
| ENSG00000144410 | 3.15E-06 | 5.00E-05    | 0.057032428 | CPO          | carboxypeptidase O                                                                                            |
| ENSG00000188994 | 3.39E-06 | 5.35E-05    | 0.092890696 | ZNF292       | zinc finger protein 292                                                                                       |
| ENSG00000182459 | 3.50E-06 | 5.48E-05    | 0.058783305 | TEX19        | testis expressed 19                                                                                           |
| ENSG00000135472 | 3.61E-06 | 5.63E-05    | 0.017195783 | FAIM2        | Fas apoptotic inhibitory molecule 2                                                                           |
| ENSG00000160013 | 3.64E-06 | 5.67E-05    | 0.03716578  | PTGIR        | prostaglandin I2 (prostacyclin) receptor (IP)                                                                 |
| ENSG00000054938 | 3.71E-06 | 5.76E-05    | 0.112365187 | CHRD2        | chordin-like 2                                                                                                |
| ENSG00000108771 | 3.86E-06 | 5.96E-05    | 0.066027249 | DHX58        | DEXH (Asp-Glu-X-His) box polypeptide 58                                                                       |
| ENSG00000224259 | 3.89E-06 | 6.00E-05    | 0.061270141 | LINC01133    | long intergenic non-protein coding RNA 1133                                                                   |
| ENSG00000136869 | 3.90E-06 | 6.01E-05    | 0.035327488 | TLR4         | toll-like receptor 4                                                                                          |
| ENSG00000154330 | 4.05E-06 | 6.19E-05    | 0.021622744 | PGM5         | phosphoglucomutase 5                                                                                          |
| ENSG00000127129 | 4.06E-06 | 6.20E-05    | 0.201719539 | EDN2         | endothelin 2                                                                                                  |
| ENSG00000137460 | 4.23E-06 | 6.43E-05    | 0.137146543 | FHDC1        | FH2 domain containing 1                                                                                       |
| ENSG00000155307 | 4.33E-06 | 6.56E-05    | 0.014797565 | SAMSN1       | SAM domain, SH3 domain and nuclear localization signals 1                                                     |
| ENSG00000176204 | 4.47E-06 | 6.72E-05    | 0.010347376 | LRRTM4       | leucine rich repeat transmembrane neuronal 4                                                                  |
| ENSG00000121903 | 4.48E-06 | 6.73E-05    | 0.108815649 | ZSCAN20      | zinc finger and SCAN domain containing 20                                                                     |
| ENSG00000120156 | 4.73E-06 | 7.06E-05    | 0.038824669 | TEK          | TEK tyrosine kinase, endothelial                                                                              |
| ENSG00000137265 | 4.78E-06 | 7.12E-05    | 0.016725978 | IRF4         | interferon regulatory factor 4                                                                                |
| ENSG00000133101 | 5.01E-06 | 7.40E-05    | 0.085139483 | CCNA1        | cyclin A1                                                                                                     |
| ENSG00000120693 | 5.24E-06 | 7.69E-05    | 0.085292362 | SMAD9        | SMAD family member 9                                                                                          |
| ENSG00000042980 | 5.29E-06 | 7.75E-05    | 0.030215273 | ADAM28       | ADAM metallopeptidase domain 28                                                                               |
| ENSG00000165730 | 5.31E-06 | 7.78E-05    | 0.087499878 | STOX1        | storkhead box 1                                                                                               |
| ENSG00000117707 | 5.32E-06 | 7.78E-05    | 0.042723013 | PROX1        | prospero homeobox 1                                                                                           |
| ENSG00000139200 | 5.53E-06 | 8.07E-05    | 0.091352784 | PIANP        | PILR alpha associated neural protein                                                                          |
| ENSG00000172296 | 5.91E-06 | 8.56E-05    | 0.030635142 | SPTLC3       | serine palmitoyltransferase, long chain base subunit 3                                                        |
| ENSG00000185742 | 6.10E-06 | 8.81E-05    | 0.049902017 | C11orf87     | chromosome 11 open reading frame 87                                                                           |
| ENSG00000106018 | 6.12E-06 | 8.83E-05    | 0.004859246 | VIPR2        | vasoactive intestinal peptide receptor 2                                                                      |
| ENSG00000275713 | 6.34E-06 | 9.08E-05    | 0.062735822 | HIST1H2BH    | histone cluster 1, H2bh                                                                                       |
| ENSG00000237803 | 6.38E-06 | 9.13E-05    | 0.007023858 | LINC00211    | long intergenic non-protein coding RNA 211                                                                    |
| ENSG00000230747 | 6.53E-06 | 9.30E-05    | 0.037069116 | LOC105373495 | uncharacterized LOC105373495                                                                                  |
| ENSG00000214691 | 6.82E-06 | 9.65E-05    | 0.021088538 | LOC388942    | uncharacterized LOC388942                                                                                     |
| ENSG00000116141 | 6.87E-06 | 9.72E-05    | 0.066332004 | MARK1        | MAP/microtubule affinity-regulating kinase 1                                                                  |
| ENSG00000186517 | 6.93E-06 | 9.78E-05    | 0.10680614  | ARHGAP30     | Rho GTPase activating protein 30                                                                              |
| ENSG00000135925 | 6.98E-06 | 9.85E-05    | 0.024297081 | WNT10A       | wingless-type MMTV integration site family, member 10A                                                        |
| ENSG00000117115 | 7.07E-06 | 9.96E-05    | 0.064414991 | PADI2        | peptidyl arginine deiminase, type II                                                                          |
| ENSG00000198483 | 7.49E-06 | 0.000104616 | 0.024850883 | ANKRD35      | ankyrin repeat domain 35                                                                                      |
| ENSG00000109758 | 7.65E-06 | 0.00010629  | 0.138494928 | HGFAC        | HGF activator                                                                                                 |
| ENSG00000130700 | 7.76E-06 | 0.000107634 | 0.072248613 | GATA5        | GATA binding protein 5                                                                                        |
| ENSG00000146267 | 7.91E-06 | 0.000109394 | 0.058043677 | FAXC         | failed axon connections homolog                                                                               |
| ENSG00000178033 | 8.61E-06 | 0.000118174 | 0.028323922 | FAM26E       | family with sequence similarity 26, member E                                                                  |
| ENSG00000277363 | 8.65E-06 | 0.00011858  | 0.084881979 | SRCIN1       | SRC kinase signaling inhibitor 1                                                                              |
| ENSG00000276600 | 8.70E-06 | 0.000119193 | 0.08507578  | RAB7B        | RAB7B, member RAS oncogene family                                                                             |
| ENSG00000111249 | 8.73E-06 | 0.000119399 | 0.03864879  | CUX2         | cut-like homeobox 2                                                                                           |
| ENSG00000137941 | 8.97E-06 | 0.000122194 | 0.100119372 | TTL7         | tubulin tyrosine ligase-like family member 7                                                                  |
| ENSG00000048740 | 9.00E-06 | 0.000122625 | 0.020137218 | CELF2        | CUGBP, Elav-like family member 2                                                                              |
| ENSG00000070526 | 9.16E-06 | 0.000124392 | 0.025783482 | ST6GALNAC1   | ST6 (alpha-N-acetyl-neuraminyl-2,3-beta-galactosyl-1,3)-N-acetylgalactosaminide alpha-2,6-sialyltransferase 1 |
| ENSG00000188825 | 9.25E-06 | 0.000125517 | 0.087160521 | LINC00910    | long intergenic non-protein coding RNA 910                                                                    |
| ENSG00000108242 | 9.41E-06 | 0.000127449 | 0.021116908 | CYP2C18      | cytochrome P450, family 2, subfamily C, polypeptide 18                                                        |
| ENSG00000009950 | 9.49E-06 | 0.000128432 | 0.165685626 | MLXIPL       | MLX interacting protein-like                                                                                  |
| ENSG00000096006 | 9.51E-06 | 0.000128551 | 0.12383872  | CRISP3       | cysteine-rich secretory protein 3                                                                             |
| ENSG00000139445 | 9.83E-06 | 0.00013211  | 0.03075152  | FOXN4        | forkhead box N4                                                                                               |
| ENSG00000275869 | 1.01E-05 | 0.000135328 | 0.086367451 | LOC102723655 | TP53-target gene 3 protein                                                                                    |

|                  |          |             |             |              |                                                                                                              |
|------------------|----------|-------------|-------------|--------------|--------------------------------------------------------------------------------------------------------------|
| ENSG00000203867  | 1.03E-05 | 0.000137792 | 0.097740451 | RBM20        | RNA binding motif protein 20                                                                                 |
| ENSG00000257588  | 1.03E-05 | 0.000138306 | 0.067439057 | LOC101927318 | uncharacterized LOC101927318                                                                                 |
| ENSG00000168702  | 1.05E-05 | 0.000139465 | 0.015727346 | LRP1B        | low density lipoprotein receptor-related protein 1B                                                          |
| ENSG00000178235  | 1.05E-05 | 0.000140201 | 0.018307279 | SLITRK1      | SLIT and NTRK-like family, member 1                                                                          |
| ENSG00000179363  | 1.06E-05 | 0.000140549 | 0.089507813 | TMEM31       | transmembrane protein 31                                                                                     |
| ENSG00000144821  | 1.08E-05 | 0.000143575 | 0.071684922 | MYH15        | myosin, heavy chain 15                                                                                       |
| ENSG00000142619  | 1.10E-05 | 0.000146292 | 0.088870644 | PADI3        | peptidyl arginine deiminase, type III                                                                        |
| ENSG00000139547  | 1.10E-05 | 0.000146318 | 0.101289901 | RDH16        | retinol dehydrogenase 16 (all-trans)                                                                         |
| ENSG00000132465  | 1.10E-05 | 0.000146318 | 0.051480846 | JCHAIN       | joining chain of multimeric IgA and IgM                                                                      |
| ENSG00000231574  | 1.14E-05 | 0.000150688 | 0.030943323 | KCCAT211     | renal clear cell carcinoma-associated transcript 211                                                         |
| ENSG00000196353  | 1.17E-05 | 0.000154163 | 0.125699703 | CPNE4        | copine IV                                                                                                    |
| ENSG00000150628  | 1.19E-05 | 0.000155803 | 0.14676851  | SPATA4       | spermatogenesis associated 4                                                                                 |
| ENSG00000099725  | 1.20E-05 | 0.000156307 | 0.033017004 | PRKY         | protein kinase, Y-linked, pseudogene                                                                         |
| ENSG00000147697  | 1.21E-05 | 0.000157932 | 0.05710624  | GSDMC        | gasdermin C                                                                                                  |
| ENSG00000142149  | 1.22E-05 | 0.000158402 | 0.047214969 | HUNK         | hormonally up-regulated Neu-associated kinase                                                                |
| ENSG00000187492  | 1.28E-05 | 0.000165757 | 0.072962486 | CDHR4        | cadherin-related family member 4                                                                             |
| ENSG00000162733  | 1.39E-05 | 0.00017755  | 0.047605098 | DDR2         | discoidin domain receptor tyrosine kinase 2                                                                  |
| ENSG00000246922  | 1.39E-05 | 0.00017755  | 0.107744418 | UBAP1L       | ubiquitin associated protein 1-like                                                                          |
| ENSG00000135338  | 1.43E-05 | 0.000182095 | 0.114420133 | LCA5         | Leber congenital amaurosis 5                                                                                 |
| ENSG00000104413  | 1.47E-05 | 0.000186483 | 0.055115393 | ESRP1        | epithelial splicing regulatory protein 1                                                                     |
| ENSG00000106178  | 1.50E-05 | 0.000189519 | 0.122219405 | CCL24        | chemokine (C-C motif) ligand 24                                                                              |
| ENSG000002028137 | 1.51E-05 | 0.000191009 | 0.034667648 | TNFRSF1B     | tumor necrosis factor receptor superfamily, member 1B                                                        |
| ENSG00000189420  | 1.57E-05 | 0.000197536 | 0.068571509 | ZFP92        | ZFP92 zinc finger protein                                                                                    |
| ENSG00000261115  | 1.59E-05 | 0.000199727 | 0.066382112 | TMEM178B     | transmembrane protein 178B                                                                                   |
| ENSG00000102174  | 1.60E-05 | 0.000200934 | 0.087113732 | PHEX         | phosphate regulating endopeptidase homolog, X-linked                                                         |
| ENSG00000185015  | 1.61E-05 | 0.000201438 | 0.057028747 | CA13         | carbonic anhydrase XIII                                                                                      |
| ENSG00000136928  | 1.61E-05 | 0.000202058 | 0.026479436 | GABBR2       | gamma-aminobutyric acid (GABA) B receptor, 2                                                                 |
| ENSG00000174951  | 1.66E-05 | 0.000207807 | 0.112983581 | FUT1         | fucosyltransferase 1 (galactoside 2-alpha-L-fucosyltransferase, H blood group)                               |
| ENSG00000251381  | 1.68E-05 | 0.000209864 | 0.022677882 | LINC00958    | long intergenic non-protein coding RNA 958                                                                   |
| ENSG00000272636  | 1.72E-05 | 0.000213288 | 0.047542843 | DOC2B        | double C2-like domains, beta                                                                                 |
| ENSG00000123977  | 1.78E-05 | 0.000220693 | 0.059578165 | DAW1         | dynein assembly factor with WDR repeat domains 1                                                             |
| ENSG00000188921  | 1.79E-05 | 0.000220844 | 0.07168551  | HACD4        | 3-hydroxyacyl-CoA dehydratase 4                                                                              |
| ENSG00000125337  | 1.82E-05 | 0.000223973 | 0.169443497 | KIF25        | kinesin family member 25                                                                                     |
| ENSG00000182836  | 1.82E-05 | 0.000224866 | 0.021235718 | PLCXD3       | phosphatidylinositol-specific phospholipase C, X domain containing 3                                         |
| ENSG00000007062  | 1.85E-05 | 0.000227979 | 0.017688345 | PROM1        | prominin 1                                                                                                   |
| ENSG00000121005  | 1.92E-05 | 0.000234658 | 0.067641024 | CRISPLD1     | cysteine-rich secretory protein LCCL domain containing 1                                                     |
| ENSG00000071073  | 1.93E-05 | 0.000236077 | 0.078933929 | MGAT4A       | mannosyl (alpha-1,3-)-glycoprotein beta-1,4-N-acetylglucosaminyltransferase, isozyme A                       |
| ENSG00000123843  | 1.95E-05 | 0.000238101 | 0.088966899 | C4BPB        | complement component 4 binding protein, beta                                                                 |
| ENSG00000196620  | 1.95E-05 | 0.000238332 | 0.103252581 | UGT2B15      | UDP glucuronosyltransferase 2 family, polypeptide B15                                                        |
| ENSG00000198734  | 1.95E-05 | 0.000238456 | 0.044920881 | F5           | coagulation factor V (proaccelerin, labile factor)                                                           |
| ENSG00000158220  | 1.97E-05 | 0.000240483 | 0.028531048 | ESY3         | extended synaptotagmin-like protein 3                                                                        |
| ENSG00000163501  | 2.00E-05 | 0.00024337  | 0.053170608 | IIHH         | indian hedgehog                                                                                              |
| ENSG00000117069  | 2.05E-05 | 0.00024812  | 0.019107819 | ST6GALNAC5   | ST6 (alpha-N-acetyl-neuraminy-2,3-beta-galactosyl-1,3)-N-acetylgalactosaminide alpha-2,6-sialyltransferase 5 |
| ENSG00000142583  | 2.07E-05 | 0.000250105 | 0.021302075 | SLC2A5       | solute carrier family 2 (facilitated glucose/fructose transporter), member 5                                 |
| ENSG00000111199  | 2.13E-05 | 0.000255902 | 0.03595225  | TRPV4        | transient receptor potential cation channel, subfamily V, member 4                                           |
| ENSG00000166341  | 2.13E-05 | 0.000255992 | 0.019894068 | DCHS1        | dachsous cadherin-related 1                                                                                  |
| ENSG00000086696  | 2.22E-05 | 0.000264855 | 0.008350724 | HSD17B2      | hydroxysteroid (17-beta) dehydrogenase 2                                                                     |
| ENSG00000062038  | 2.22E-05 | 0.000265558 | 0.036809525 | CDH3         | cadherin 3, type 1, P-cadherin (placental)                                                                   |
| ENSG00000069188  | 2.28E-05 | 0.000271126 | 0.044982042 | SDK2         | sidekick cell adhesion molecule 2                                                                            |
| ENSG00000186648  | 2.33E-05 | 0.000276677 | 0.049766156 | LRRC16B      | leucine rich repeat containing 16B                                                                           |
| ENSG00000171051  | 2.37E-05 | 0.000280431 | 0.174814036 | FPR1         | formyl peptide receptor 1                                                                                    |
| ENSG00000243137  | 2.39E-05 | 0.00028265  | 0.067327797 | PSG4         | pregnancy specific beta-1-glycoprotein 4                                                                     |
| ENSG00000122420  | 2.47E-05 | 0.000290264 | 0.033507523 | PTGFR        | prostaglandin F receptor (FP)                                                                                |
| ENSG00000258867  | 2.50E-05 | 0.000292281 | 0.013281141 | LINC01146    | long intergenic non-protein coding RNA 1146                                                                  |
| ENSG00000015520  | 2.55E-05 | 0.000297022 | 0.021128833 | NPC1L1       | NPC1-like 1                                                                                                  |
| ENSG00000129244  | 2.56E-05 | 0.000297467 | 0.03504848  | ATP1B2       | ATPase, Na <sup>+</sup> /K <sup>+</sup> transporting, beta 2 polypeptide                                     |
| ENSG00000172985  | 2.62E-05 | 0.000304113 | 0.057428523 | SH3RF3       | SH3 domain containing ring finger 3                                                                          |
| ENSG00000175048  | 2.64E-05 | 0.000305229 | 0.204086181 | ZDHHC14      | zinc finger, DHHC-type containing 14                                                                         |
| ENSG00000182308  | 2.71E-05 | 0.000312645 | 0.125037881 | DCAF4L1      | DDb1 and CUL4 associated factor 4-like 1                                                                     |
| ENSG00000188897  | 2.80E-05 | 0.000321651 | 0.015345622 | LOC400499    | uncharacterized LOC400499                                                                                    |
| ENSG00000163884  | 2.81E-05 | 0.000322639 | 0.052258569 | KLF15        | Kruppel-like factor 15                                                                                       |
| ENSG00000168135  | 2.89E-05 | 0.000330344 | 0.076019599 | KCNJ4        | potassium channel, inwardly rectifying subfamily J, member 4                                                 |
| ENSG00000143603  | 2.93E-05 | 0.000333911 | 0.009850026 | KCNN3        | potassium channel, calcium activated intermediate/small conductance subfamily N alpha, member 3              |
| ENSG00000231528  | 3.03E-05 | 0.000343995 | 0.013544861 | FAM225A      | family with sequence similarity 225, member A (non-protein coding)                                           |
| ENSG00000215246  | 3.06E-05 | 0.000347435 | 0.020402201 | LOC100506688 | uncharacterized LOC100506688                                                                                 |

|                 |          |             |             |              |                                                                                                      |
|-----------------|----------|-------------|-------------|--------------|------------------------------------------------------------------------------------------------------|
| ENSG00000183709 | 3.11E-05 | 0.000351985 | 0.12402046  | IFNL2        | interferon, lambda 2                                                                                 |
| ENSG00000107954 | 3.11E-05 | 0.000352542 | 0.088354258 | NEURL1       | neutralized E3 ubiquitin protein ligase 1                                                            |
| ENSG00000169247 | 3.15E-05 | 0.000356079 | 0.016308375 | SH3TC2       | SH3 domain and tetratricopeptide repeats 2                                                           |
| ENSG00000131203 | 3.20E-05 | 0.000361571 | 0.052982136 | IDO1         | indoleamine 2,3-dioxygenase 1                                                                        |
| ENSG00000115232 | 3.24E-05 | 0.000364649 | 0.034673104 | ITGA4        | integrin, alpha 4 (antigen CD49D; alpha 4 subunit of VLA-4 receptor)                                 |
| ENSG00000255571 | 3.31E-05 | 0.000371728 | 0.032556138 | LINC00925    | long intergenic non-protein coding RNA 925                                                           |
| ENSG00000165807 | 3.32E-05 | 0.000373126 | 0.053876792 | PPP1R36      | protein phosphatase 1, regulatory subunit 36                                                         |
| ENSG00000234928 | 3.32E-05 | 0.000373395 | 0.046132633 | LOC101929374 | uncharacterized LOC101929374                                                                         |
| ENSG00000088726 | 3.33E-05 | 0.000373893 | 0.061593644 | TMEM40       | transmembrane protein 40                                                                             |
| ENSG00000133317 | 3.33E-05 | 0.000373893 | 0.024704307 | LGALS12      | lectin, galactoside-binding, soluble, 12                                                             |
| ENSG00000106772 | 3.35E-05 | 0.00037564  | 0.016507005 | PRUNE2       | prune homolog 2 (Drosophila)                                                                         |
| ENSG00000197943 | 3.37E-05 | 0.000377133 | 0.077108706 | PLCG2        | phospholipase C, gamma 2 (phosphatidylinositol-specific)                                             |
| ENSG00000171033 | 3.44E-05 | 0.000383545 | 0.033279477 | PKIA         | protein kinase (cAMP-dependent, catalytic) inhibitor alpha                                           |
| ENSG00000134917 | 3.57E-05 | 0.000396649 | 0.05134043  | ADAMTS8      | ADAM metalloproteinase with thrombospondin type 1 motif, 8                                           |
| ENSG00000198336 | 3.66E-05 | 0.000406072 | 0.020082892 | MYL4         | myosin, light chain 4, alkali; atrial, embryonic                                                     |
| ENSG00000050555 | 3.83E-05 | 0.000422474 | 0.122660765 | LAMC3        | laminin, gamma 3                                                                                     |
| ENSG00000080224 | 3.84E-05 | 0.000423641 | 0.035475628 | EPHA6        | EPH receptor A6                                                                                      |
| ENSG00000138771 | 3.91E-05 | 0.000430053 | 0.043326026 | SHROOM3      | shroom family member 3                                                                               |
| ENSG00000127324 | 3.92E-05 | 0.000431085 | 0.086158304 | TSPAN8       | tetraspanin 8                                                                                        |
| ENSG00000251158 | 4.00E-05 | 0.000438642 | 0.031497895 | LOC101929573 | putative POM121-like protein 1-like                                                                  |
| ENSG00000135144 | 4.27E-05 | 0.000463634 | 0.067447162 | DTX1         | deltex 1, E3 ubiquitin ligase                                                                        |
| ENSG00000116785 | 4.43E-05 | 0.000478298 | 0.085862383 | CFHR3        | complement factor H-related 3                                                                        |
| ENSG00000198848 | 4.45E-05 | 0.000479695 | 0.044701211 | CES1         | carboxylesterase 1                                                                                   |
| ENSG00000149527 | 4.48E-05 | 0.000481999 | 0.019453367 | PLCH2        | phospholipase C, eta 2                                                                               |
| ENSG00000109943 | 4.51E-05 | 0.000484474 | 0.045317144 | CRTAM        | cytotoxic and regulatory T cell molecule                                                             |
| ENSG00000184838 | 4.54E-05 | 0.000487713 | 0.056997455 | PRR16        | proline rich 16                                                                                      |
| ENSG00000144218 | 4.57E-05 | 0.000490243 | 0.02082777  | AFF3         | AF4/FMR2 family, member 3                                                                            |
| ENSG00000125804 | 4.62E-05 | 0.000494911 | 0.02378819  | FAM182A      | family with sequence similarity 182, member A                                                        |
| ENSG00000129159 | 4.63E-05 | 0.000495585 | 0.007350271 | KCNK1        | potassium channel, voltage gated Shaw related subfamily C, member 1                                  |
| ENSG00000171786 | 4.75E-05 | 0.000505723 | 0.133024093 | NHLH1        | nescent helix loop helix 1                                                                           |
| ENSG00000171388 | 4.75E-05 | 0.000505975 | 0.046970049 | APLN         | apelin                                                                                               |
| ENSG00000182256 | 4.79E-05 | 0.000509386 | 0.01141726  | GABRG3       | gamma-aminobutyric acid (GABA) A receptor, gamma 3                                                   |
| ENSG00000163121 | 5.00E-05 | 0.00052847  | 0.081936195 | NEURL3       | neutralized E3 ubiquitin protein ligase 3                                                            |
| ENSG00000143278 | 5.18E-05 | 0.000545355 | 0.047969089 | F13B         | coagulation factor XIII, B polypeptide                                                               |
| ENSG00000101331 | 5.20E-05 | 0.000546536 | 0.082498648 | CCM2L        | cerebral cavernous malformation 2-like                                                               |
| ENSG00000276203 | 5.40E-05 | 0.000565904 | 0.0120131   | ANKRD20A3    | ankyrin repeat domain 20 family, member A3                                                           |
| ENSG00000127311 | 5.52E-05 | 0.000576855 | 0.083810861 | HELB         | helicase (DNA) B                                                                                     |
| ENSG00000114378 | 5.55E-05 | 0.000579661 | 0.051204642 | HYAL1        | hyaluronoglucosaminidase 1                                                                           |
| ENSG00000134817 | 5.58E-05 | 0.000582124 | 0.244918594 | APLNR        | apelin receptor                                                                                      |
| ENSG00000135447 | 5.61E-05 | 0.000585205 | 0.022714994 | PPP1R1A      | protein phosphatase 1, regulatory (inhibitor) subunit 1A                                             |
| ENSG00000215644 | 5.66E-05 | 0.000588966 | 0.039193465 | GCGR         | glucagon receptor                                                                                    |
| ENSG00000164362 | 5.72E-05 | 0.000594645 | 0.047033169 | TERT         | telomerase reverse transcriptase                                                                     |
| ENSG00000166473 | 5.73E-05 | 0.000594832 | 0.044710401 | PKD1L2       | polycystic kidney disease 1-like 2 (gene/pseudogene)                                                 |
| ENSG00000060566 | 5.77E-05 | 0.000598783 | 0.027031749 | CREB3L3      | cAMP responsive element binding protein 3-like 3                                                     |
| ENSG00000138271 | 5.86E-05 | 0.000606938 | 0.138503045 | GPR87        | G protein-coupled receptor 87                                                                        |
| ENSG00000066405 | 5.92E-05 | 0.000612028 | 0.011624731 | CLDN18       | claudin 18                                                                                           |
| ENSG00000100298 | 5.96E-05 | 0.000615612 | 0.203690321 | APOBEC3H     | apolipoprotein B mRNA editing enzyme, catalytic polypeptide-like 3H                                  |
| ENSG00000159618 | 6.00E-05 | 0.000619794 | 0.01456013  | ADGRG5       | adhesion G protein-coupled receptor G5                                                               |
| ENSG00000147168 | 6.01E-05 | 0.000620986 | 0.056143963 | IL2RG        | interleukin 2 receptor, gamma                                                                        |
| ENSG00000115616 | 6.19E-05 | 0.000636334 | 0.089112895 | SLC9A2       | solute carrier family 9, subfamily A (NHE2, cation proton antiporter 2), member 2                    |
| ENSG00000127252 | 6.22E-05 | 0.000638788 | 0.160729858 | HRASL5       | HRAS-like suppressor                                                                                 |
| ENSG00000167037 | 6.29E-05 | 0.000645663 | 0.037874639 | SGSM1        | small G protein signaling modulator 1                                                                |
| ENSG00000132554 | 6.39E-05 | 0.000654431 | 0.03378146  | RGS22        | regulator of G-protein signaling 22                                                                  |
| ENSG00000182557 | 6.42E-05 | 0.000657101 | 0.047152231 | SPNS3        | spinster homolog 3 (Drosophila)                                                                      |
| ENSG00000169435 | 6.43E-05 | 0.000658379 | 0.143164869 | RASSF6       | Ras association (RalGDS/AF-6) domain family member 6                                                 |
| ENSG00000092470 | 6.44E-05 | 0.000659134 | 0.160327749 | WDR76        | WD repeat domain 76                                                                                  |
| ENSG00000184828 | 6.60E-05 | 0.000673701 | 0.013742592 | ZBTB7C       | zinc finger and BTB domain containing 7C                                                             |
| ENSG00000178226 | 6.82E-05 | 0.000692576 | 0.063960689 | PRSS36       | protease, serine, 36                                                                                 |
| ENSG00000151490 | 6.85E-05 | 0.000695447 | 0.049830863 | PTPRO        | protein tyrosine phosphatase, receptor type, O                                                       |
| ENSG00000154451 | 6.90E-05 | 0.000698794 | 0.008693324 | GBP5         | guanylate binding protein 5                                                                          |
| ENSG00000175697 | 7.24E-05 | 0.000727303 | 0.034459241 | GPR156       | G protein-coupled receptor 156                                                                       |
| ENSG00000124935 | 7.72E-05 | 0.000768186 | 0.100160496 | SCGB1D2      | secretoglobin, family 1D, member 2                                                                   |
| ENSG00000277893 | 7.73E-05 | 0.000768969 | 0.038327934 | SRDSA2       | steroid-5-alpha-reductase, alpha polypeptide 2 (3-oxo-5 alpha-steroid delta 4-dehydrogenase alpha 2) |
| ENSG00000160145 | 7.74E-05 | 0.000769165 | 0.020264981 | KALRN        | kalirin, RhoGEF kinase                                                                               |
| ENSG00000250075 | 7.75E-05 | 0.000769561 | 0.03995397  | LOC101927237 | uncharacterized LOC101927237                                                                         |

|                 |             |             |             |              |                                                                                                      |
|-----------------|-------------|-------------|-------------|--------------|------------------------------------------------------------------------------------------------------|
| ENSG00000126759 | 7.88E-05    | 0.000781453 | 0.102089799 | CFP          | complement factor properdin                                                                          |
| ENSG00000064835 | 7.89E-05    | 0.000782554 | 0.043361136 | POU1F1       | POU class 1 homeobox 1                                                                               |
| ENSG00000237330 | 7.99E-05    | 0.000790496 | 0.03235186  | RNF223       | ring finger protein 223                                                                              |
| ENSG00000182040 | 8.01E-05    | 0.000791854 | 0.015712369 | USH1G        | Usher syndrome 1G (autosomal recessive)                                                              |
| ENSG00000257838 | 8.09E-05    | 0.000799581 | 0.053265169 | LOC653786    | otoancorin pseudogene                                                                                |
| ENSG00000130940 | 8.15E-05    | 0.000804549 | 0.035168149 | CASZ1        | castor zinc finger 1                                                                                 |
| ENSG00000134830 | 8.22E-05    | 0.000810641 | 0.027860472 | CSAR2        | complement component 5a receptor 2                                                                   |
| ENSG00000102524 | 8.37E-05    | 0.000823778 | 0.179843278 | TNFSF13B     | tumor necrosis factor (ligand) superfamily, member 13b                                               |
| ENSG00000160161 | 8.37E-05    | 0.000824187 | 0.116653851 | CILP2        | cartilage intermediate layer protein 2                                                               |
| ENSG00000153002 | 8.48E-05    | 0.00083331  | 0.005131472 | CPB1         | carboxypeptidase B1 (tissue)                                                                         |
| ENSG00000105549 | 8.59E-05    | 0.000841937 | 0.031113177 | THEG         | theg spermatid protein                                                                               |
| ENSG00000205403 | 8.72E-05    | 0.000854393 | 0.095518865 | CFI          | complement factor I                                                                                  |
| ENSG00000149548 | 8.91E-05    | 0.000870002 | 0.064235816 | CCDC15       | coiled-coil domain containing 15                                                                     |
| ENSG00000274600 | 8.95E-05    | 0.00087331  | 0.086110751 | RIMBP3B      | RIMS binding protein 3B                                                                              |
| ENSG00000102970 | 9.15E-05    | 0.000891163 | 0.075153791 | CCL17        | chemokine (C-C motif) ligand 17                                                                      |
| ENSG00000171236 | 9.23E-05    | 0.00089698  | 0.031404021 | LRG1         | leucine-rich alpha-2-glycoprotein 1                                                                  |
| ENSG00000185432 | 9.39E-05    | 0.000909501 | 0.0205311   | METTL7A      | methyltransferase like 7A                                                                            |
| ENSG00000119547 | 9.47E-05    | 0.000915791 | 0.049562537 | ONECUT2      | one cut homeobox 2                                                                                   |
| ENSG00000186510 | 9.50E-05    | 0.000918238 | 0.026102078 | CLCNKA       | chloride channel, voltage-sensitive Ka                                                               |
| ENSG00000254703 | 9.69E-05    | 0.000934939 | 0.067757277 | SENCR        | smooth muscle and endothelial cell enriched migration/differentiation-associated long non-coding RNA |
| ENSG00000180229 | 9.89E-05    | 0.000951702 | 0.106749211 | HERC2P3      | hct domain and RLD 2 pseudogene 3                                                                    |
| ENSG00000160870 | 9.95E-05    | 0.000955818 | 0.041281854 | CYP3A7       | cytochrome P450, family 3, subfamily A, polypeptide 7                                                |
| ENSG00000183128 | 0.000100383 | 0.000963554 | 0.081441009 | CALHM3       | calcium homeostasis modulator 3                                                                      |
| ENSG00000143546 | 0.00010272  | 0.000982511 | 0.019393078 | S100A8       | S100 calcium binding protein A8                                                                      |
| ENSG00000135116 | 0.000103548 | 0.00098997  | 0.255372846 | HRK          | harakiri, BCL2 interacting protein                                                                   |
| ENSG00000255398 | 0.000105023 | 0.001001955 | 0.05658719  | HCAR3        | hydroxycarboxylic acid receptor 3                                                                    |
| ENSG00000156886 | 0.000105954 | 0.001009414 | 0.01481011  | ITGAD        | integrin, alpha D                                                                                    |
| ENSG00000133083 | 0.000107365 | 0.001019513 | 0.038425871 | DCLK1        | doublecortin-like kinase 1                                                                           |
| ENSG00000233705 | 0.000107778 | 0.00102201  | 0.014248075 | SLC26A4-AS1  | SLC26A4 antisense RNA 1                                                                              |
| ENSG00000076258 | 0.000109541 | 0.001035589 | 0.098770391 | FMO4         | flavin containing monooxygenase 4                                                                    |
| ENSG00000165071 | 0.000110369 | 0.001042449 | 0.059614177 | TMEM71       | transmembrane protein 71                                                                             |
| ENSG00000149922 | 0.000112273 | 0.001057001 | 0.11419932  | TBX6         | T-box 6                                                                                              |
| ENSG00000138083 | 0.00011347  | 0.001066097 | 0.051685301 | SIX3         | SIX homeobox 3                                                                                       |
| ENSG00000069431 | 0.000114133 | 0.001070797 | 0.014546693 | ABCC9        | ATP-binding cassette, sub-family C (CFTR/MRP), member 9                                              |
| ENSG00000113494 | 0.000115154 | 0.001078636 | 0.007233556 | PRLR         | prolactin receptor                                                                                   |
| ENSG00000118620 | 0.000116008 | 0.001085673 | 0.070938269 | ZNF430       | zinc finger protein 430                                                                              |
| ENSG00000166143 | 0.000116475 | 0.001088761 | 0.252755202 | PPP1R14D     | protein phosphatase 1, regulatory (inhibitor) subunit 14D                                            |
| ENSG00000141574 | 0.000118292 | 0.001103209 | 0.041335294 | SECTM1       | secreted and transmembrane 1                                                                         |
| ENSG00000140600 | 0.000122783 | 0.001139095 | 0.038809721 | SH3GL3       | SH3-domain GRB2-like 3                                                                               |
| ENSG00000167157 | 0.000123225 | 0.001142385 | 0.237800298 | PRRX2        | paired related homeobox 2                                                                            |
| ENSG00000271133 | 0.00012325  | 0.001142385 | 0.084711838 | LOC101927811 | uncharacterized LOC101927811                                                                         |
| ENSG00000127325 | 0.000124281 | 0.001150315 | 0.03484952  | BEST3        | bestrophin 3                                                                                         |
| ENSG00000158473 | 0.000126666 | 0.001169254 | 0.097148932 | CD1D         | CD1d molecule                                                                                        |
| ENSG00000111860 | 0.000129133 | 0.001189332 | 0.077959625 | CEP85L       | centrosomal protein 85kDa-like                                                                       |
| ENSG00000110076 | 0.000129894 | 0.001195257 | 0.048968451 | NRXN2        | neurexin 2                                                                                           |
| ENSG00000257842 | 0.00013     | 0.001195939 | 0.023637431 | LOC102725045 | uncharacterized LOC102725045                                                                         |
| ENSG00000227507 | 0.000131604 | 0.001208262 | 0.249323703 | LTB          | lymphotoxin beta (TNF superfamily, member 3)                                                         |
| ENSG00000249306 | 0.000133864 | 0.001224599 | 0.038818439 | LINC01411    | long intergenic non-protein coding RNA 1411                                                          |
| ENSG00000184584 | 0.000135573 | 0.00123828  | 0.083813583 | TMEM173      | transmembrane protein 173                                                                            |
| ENSG00000108924 | 0.000139202 | 0.001264336 | 0.025127953 | HLF          | hepatic leukemia factor                                                                              |
| ENSG00000173868 | 0.000139499 | 0.001266472 | 0.115969105 | PHOSPHO1     | phosphatase, orphan 1                                                                                |
| ENSG00000179674 | 0.000140741 | 0.00127632  | 0.115102137 | ARL14        | ADP-ribosylation factor-like 14                                                                      |
| ENSG00000126016 | 0.000141151 | 0.001279471 | 0.015077207 | AMOT         | angiomin                                                                                             |
| ENSG00000109705 | 0.000141245 | 0.001280041 | 0.074573901 | NKX3-2       | NK3 homeobox 2                                                                                       |
| ENSG00000250138 | 0.000142667 | 0.001292638 | 0.011079861 | LOC728093    | putative POM121-like protein 1-like                                                                  |
| ENSG00000174015 | 0.000144449 | 0.001303849 | 0.071061445 | SPERT        | spermatid associated                                                                                 |
| ENSG00000167332 | 0.000145025 | 0.001308182 | 0.022025856 | OR51E2       | olfactory receptor, family 51, subfamily E, member 2                                                 |
| ENSG00000146453 | 0.000145381 | 0.001310816 | 0.058730859 | PNLDC1       | poly(A)-specific ribonuclease (PARN)-like domain containing 1                                        |
| ENSG00000260057 | 0.000147391 | 0.001325996 | 0.019078723 | LINC01571    | long intergenic non-protein coding RNA 1571                                                          |
| ENSG00000166924 | 0.000148535 | 0.001334296 | 0.077588371 | NYAP1        | neuronal tyrosine-phosphorylated phosphoinositide-3-kinase adaptor 1                                 |
| ENSG00000060140 | 0.000149153 | 0.001338594 | 0.041867091 | STYK1        | serine/threonine/tyrosine kinase 1                                                                   |
| ENSG00000204021 | 0.000150743 | 0.00134989  | 0.018191123 | LIPK         | lipase, family member K                                                                              |
| ENSG00000151388 | 0.000152556 | 0.001362232 | 0.044762264 | ADAMTS12     | ADAM metalloproteinase with thrombospondin type 1 motif, 12                                          |
| ENSG00000107295 | 0.000152607 | 0.001362386 | 0.033213242 | SH3GL2       | SH3-domain GRB2-like 2                                                                               |
| ENSG00000147234 | 0.000153353 | 0.001368449 | 0.012023945 | FRMPD3       | FERM and PDZ domain containing 3                                                                     |

|                 |             |             |             |              |                                                                            |
|-----------------|-------------|-------------|-------------|--------------|----------------------------------------------------------------------------|
| ENSG00000165556 | 0.000154582 | 0.001378507 | 0.039258089 | CDX2         | caudal type homeobox 2                                                     |
| ENSG00000091656 | 0.000154697 | 0.001378926 | 0.048139022 | ZFHX4        | zinc finger homeobox 4                                                     |
| ENSG00000171195 | 0.000155665 | 0.001384829 | 0.00843556  | MUC7         | mucin 7, secreted                                                          |
| ENSG00000103485 | 0.00015804  | 0.001404115 | 0.052884393 | QPRT         | quinolinate phosphoribosyltransferase                                      |
| ENSG00000028277 | 0.000163738 | 0.001446224 | 0.087556489 | POU2F2       | POU class 2 homeobox 2                                                     |
| ENSG00000139364 | 0.000164155 | 0.001449592 | 0.008848006 | TMEM132B     | transmembrane protein 132B                                                 |
| ENSG00000205693 | 0.000165691 | 0.001446094 | 0.037540257 | MANSC4       | MANSC domain containing 4                                                  |
| ENSG00000147676 | 0.00017262  | 0.001513834 | 0.038643576 | MAL2         | mal, T-cell differentiation protein 2 (gene/pseudogene)                    |
| ENSG00000236333 | 0.000173495 | 0.001520203 | 0.013977601 | TRHDE-AS1    | TRHDE antisense RNA 1                                                      |
| ENSG00000157445 | 0.000176117 | 0.00154152  | 0.03469272  | CACNA2D3     | calcium channel, voltage-dependent, alpha 2/delta subunit 3                |
| ENSG00000165023 | 0.000177355 | 0.001551015 | 0.040907292 | DIRAS2       | DIRAS family, GTP-binding RAS-like 2                                       |
| ENSG00000038295 | 0.000180917 | 0.001577084 | 0.142859589 | TLL1         | tollid-like 1                                                              |
| ENSG00000268738 | 0.000182231 | 0.001586484 | 0.083507798 | HSFX2        | heat shock transcription factor family, X linked 2                         |
| ENSG00000123570 | 0.00018539  | 0.001609531 | 0.026850776 | RAB9B        | RAB9B, member RAS oncogene family                                          |
| ENSG00000118971 | 0.000185903 | 0.001613645 | 0.205226279 | CCND2        | cyclin D2                                                                  |
| ENSG00000103546 | 0.000191375 | 0.001655432 | 0.004097347 | SLC6A2       | solute carrier family 6 (neurotransmitter transporter), member 2           |
| ENSG00000248309 | 0.000193291 | 0.001667106 | 0.002515414 | MEF2C-AS1    | MEF2C antisense RNA 1                                                      |
| ENSG00000126217 | 0.000197702 | 0.001701912 | 0.01964929  | MCF2L        | MCF2 cell line derived transforming sequence-like                          |
| ENSG00000189045 | 0.00019843  | 0.001707453 | 0.048950499 | ANKDD1B      | ankyrin repeat and death domain containing 1B                              |
| ENSG00000164588 | 0.000199075 | 0.001711196 | 0.006167881 | HCN1         | hyperpolarization activated cyclic nucleotide gated potassium channel 1    |
| ENSG00000133433 | 0.000200945 | 0.00172399  | 0.101997862 | GSTT2B       | glutathione S-transferase theta 2B (gene/pseudogene)                       |
| ENSG00000005001 | 0.000203919 | 0.001745833 | 0.203319681 | PRSS22       | protease, serine, 22                                                       |
| ENSG00000265763 | 0.000206887 | 0.001766785 | 0.105816155 | ZNF488       | zinc finger protein 488                                                    |
| ENSG00000114757 | 0.00020811  | 0.00177574  | 0.008587537 | PEX5L        | peroxisomal biogenesis factor 5-like                                       |
| ENSG00000181690 | 0.000208539 | 0.001778605 | 0.070249372 | PLAG1        | pleiomorphic adenoma gene 1                                                |
| ENSG00000138622 | 0.000210464 | 0.001791323 | 0.035766665 | HCN4         | hyperpolarization activated cyclic nucleotide gated potassium channel 4    |
| ENSG00000120279 | 0.000210795 | 0.001793762 | 0.052441724 | MYCT1        | myc target 1                                                               |
| ENSG00000116014 | 0.000211678 | 0.001799754 | 0.227287564 | KISS1R       | KISS1 receptor                                                             |
| ENSG00000135744 | 0.000215494 | 0.001828644 | 0.098476884 | AGT          | angiotensinogen (serpin peptidase inhibitor, clade A, member 8)            |
| ENSG00000123243 | 0.000216007 | 0.001831224 | 0.023329711 | ITIH5        | inter-alpha-trypsin inhibitor heavy chain family, member 5                 |
| ENSG00000089558 | 0.000217176 | 0.001839255 | 0.050998858 | KCNH4        | potassium channel, voltage gated eag related subfamily H, member 4         |
| ENSG00000133107 | 0.000219363 | 0.001855424 | 0.0170285   | TRPC4        | transient receptor potential cation channel, subfamily C, member 4         |
| ENSG00000184599 | 0.000219572 | 0.00185642  | 0.066688948 | FAM19A3      | family with sequence similarity 19 (chemokine (C-C motif)-like), member A3 |
| ENSG00000130038 | 0.000220946 | 0.001866623 | 0.027211402 | CRACR2A      | calcium release activated channel regulator 2A                             |
| ENSG00000086205 | 0.000221635 | 0.001871922 | 0.020856126 | FOLH1        | folate hydrolase (prostate-specific membrane antigen) 1                    |
| ENSG00000141668 | 0.000222434 | 0.001876472 | 0.073252926 | CBLN2        | cerebellin 2 precursor                                                     |
| ENSG00000160838 | 0.000225752 | 0.001900386 | 0.057479295 | LRRC71       | leucine rich repeat containing 71                                          |
| ENSG00000003096 | 0.000229064 | 0.001924689 | 0.021057824 | KLHL13       | kelch-like family member 13                                                |
| ENSG00000105855 | 0.0002329   | 0.001952087 | 0.118680837 | ITGB8        | integrin, beta 8                                                           |
| ENSG00000248538 | 0.000233691 | 0.001957502 | 0.063205858 | LOC101929128 | uncharacterized LOC101929128                                               |
| ENSG00000015413 | 0.000242276 | 0.002019447 | 0.033171697 | DPEP1        | dipeptidase 1 (renal)                                                      |
| ENSG00000053918 | 0.000244013 | 0.002029766 | 0.04638128  | KCNQ1        | potassium channel, voltage gated KQT-like subfamily Q, member 1            |
| ENSG00000213967 | 0.00024811  | 0.002059222 | 0.019869802 | ZNF726       | zinc finger protein 726                                                    |
| ENSG00000182393 | 0.000248995 | 0.002064466 | 0.08084156  | IFNL1        | interferon, lambda 1                                                       |
| ENSG00000143365 | 0.000258372 | 0.002130737 | 0.008582183 | RORC         | RAR-related orphan receptor C                                              |
| ENSG00000133019 | 0.000258453 | 0.002130737 | 0.018533868 | CHRM3        | cholinergic receptor, muscarinic 3                                         |
| ENSG00000082126 | 0.000258896 | 0.00213352  | 0.037704444 | MPP4         | membrane protein, palmitoylated 4 (MAGUK p55 subfamily member 4)           |
| ENSG00000159784 | 0.000260193 | 0.002141173 | 0.044963894 | FAM131B      | family with sequence similarity 131, member B                              |
| ENSG00000141449 | 0.000268623 | 0.002201207 | 0.032856611 | GREB1L       | growth regulation by estrogen in breast cancer-like                        |
| ENSG00000197599 | 0.000276455 | 0.002257663 | 0.191184724 | CCDC154      | coiled-coil domain containing 154                                          |
| ENSG00000185518 | 0.0002769   | 0.002260838 | 0.005425109 | SV2B         | synaptic vesicle glycoprotein 2B                                           |
| ENSG00000170290 | 0.000278683 | 0.002273579 | 0.153566865 | SLN          | sarcolipin                                                                 |
| ENSG00000107859 | 0.000283261 | 0.002305379 | 0.076674289 | PITX3        | paired-like homeodomain 3                                                  |
| ENSG00000256594 | 0.000283784 | 0.002309175 | 0.213573501 | LOC374443    | C-type lectin domain family 2, member D pseudogene                         |
| ENSG00000135605 | 0.000289518 | 0.002348789 | 0.094706873 | TEC          | tec protein tyrosine kinase                                                |
| ENSG00000079689 | 0.000290607 | 0.002356635 | 0.0263625   | SCGN         | secretagogin, EF-hand calcium binding protein                              |
| ENSG00000214711 | 0.000298334 | 0.002406891 | 0.019856119 | CAPN14       | calpain 14                                                                 |
| ENSG00000136531 | 0.000301042 | 0.002425854 | 0.032284842 | SCN2A        | sodium channel, voltage gated, type II alpha subunit                       |
| ENSG00000242258 | 0.000308445 | 0.002476682 | 0.046293008 | LINC00996    | long intergenic non-protein coding RNA 996                                 |
| ENSG00000259974 | 0.000314373 | 0.002517331 | 0.206163247 | LINC00261    | long intergenic non-protein coding RNA 261                                 |
| ENSG00000157613 | 0.000317923 | 0.00253977  | 0.134460114 | CREB3L1      | cAMP responsive element binding protein 3-like 1                           |
| ENSG00000221955 | 0.000322429 | 0.002572229 | 0.109674942 | SLC12A8      | solute carrier family 12, member 8                                         |
| ENSG00000007264 | 0.000323561 | 0.002580755 | 0.064122832 | MATK         | megakaryocyte-associated tyrosine kinase                                   |
| ENSG00000187772 | 0.000331013 | 0.002630914 | 0.054328284 | LIN28B       | lin-28 homolog B (C. elegans)                                              |
| ENSG00000151623 | 0.000333353 | 0.002646419 | 0.05589458  | NR3C2        | nuclear receptor subfamily 3, group C, member 2                            |



|                  |             |             |             |              |                                                                                   |
|------------------|-------------|-------------|-------------|--------------|-----------------------------------------------------------------------------------|
| ENSG00000130176  | 0.000337695 | 0.002675145 | 0.079732338 | CNN1         | calponin 1, basic, smooth muscle                                                  |
| ENSG00000204421  | 0.000340772 | 0.002696378 | 0.116101124 | LY6G6C       | lymphocyte antigen 6 complex, locus G6C                                           |
| ENSG00000256164  | 0.000345128 | 0.002727134 | 0.157596711 | CCND2-AS1    | CCND2 antisense RNA 1                                                             |
| ENSG00000185467  | 0.000348951 | 0.002755737 | 0.207432651 | KPNA7        | karyopherin alpha 7 (importin alpha 8)                                            |
| ENSG00000011201  | 0.000357733 | 0.002815805 | 0.015912743 | ANOS1        | anosmin 1                                                                         |
| ENSG00000189090  | 0.000362581 | 0.002848459 | 0.065948349 | FAM25G       | family with sequence similarity 25, member G                                      |
| ENSG00000276476  | 0.000366197 | 0.002874096 | 0.072725664 | LINC00540    | long intergenic non-protein coding RNA 540                                        |
| ENSG00000177181  | 0.000373925 | 0.002927976 | 0.067737499 | RIMKLA       | ribosomal modification protein rimK-like family member A                          |
| ENSG000000087301 | 0.00037914  | 0.002960269 | 0.068572386 | TXNDC16      | thioredoxin domain containing 16                                                  |
| ENSG00000163673  | 0.000383001 | 0.002988129 | 0.019762826 | DCLK3        | doublecortin-like kinase 3                                                        |
| ENSG00000197880  | 0.000386763 | 0.003012282 | 0.034503449 | MDS2         | myelodysplastic syndrome 2 translocation associated                               |
| ENSG00000228358  | 0.000390606 | 0.003038143 | 0.057303633 | LOC105377390 | uncharacterized LOC105377390                                                      |
| ENSG00000168939  | 0.000393455 | 0.00305914  | 0.047120565 | SPRY3        | sprouty RTK signaling antagonist 3                                                |
| ENSG00000111732  | 0.00040113  | 0.003108716 | 0.032973285 | AICDA        | activation-induced cytidine deaminase                                             |
| ENSG00000104967  | 0.000403181 | 0.003122238 | 0.151281357 | NOVA2        | neuro-oncological ventral antigen 2                                               |
| ENSG00000116819  | 0.000407106 | 0.00314665  | 0.142436756 | TFAP2E       | transcription factor AP-2 epsilon (activating enhancer binding protein 2 epsilon) |
| ENSG00000164047  | 0.000410695 | 0.003170774 | 0.05060759  | CAMP         | cathelicidin antimicrobial peptide                                                |
| ENSG00000163689  | 0.000413682 | 0.003192023 | 0.033798099 | C3orf67      | chromosome 3 open reading frame 67                                                |
| ENSG00000115604  | 0.00042187  | 0.003250271 | 0.157633406 | IL18R1       | interleukin 18 receptor 1                                                         |
| ENSG00000160097  | 0.000428166 | 0.003293178 | 0.050232281 | FNDC5        | fibronectin type III domain containing 5                                          |
| ENSG00000163590  | 0.000428552 | 0.003294898 | 0.087045636 | PPM1L        | protein phosphatase, Mg2+/Mn2+ dependent, 1L                                      |
| ENSG00000255819  | 0.00043277  | 0.003323561 | 0.065021853 | KLRC4-KLRK1  | KLRC4-KLRK1 readthrough                                                           |
| ENSG00000248905  | 0.000440982 | 0.003378346 | 0.042710942 | FMN1         | formin 1                                                                          |
| ENSG00000139970  | 0.000447256 | 0.003416129 | 0.024834536 | RTN1         | reticulin 1                                                                       |
| ENSG00000234155  | 0.000447848 | 0.003418721 | 0.226046454 | LOC101928820 | uncharacterized LOC101928820                                                      |
| ENSG00000113430  | 0.000450484 | 0.003435036 | 0.142585388 | IRX4         | iroquois homeobox 4                                                               |
| ENSG00000119915  | 0.000453033 | 0.003449897 | 0.179696861 | ELOVL3       | ELOVL fatty acid elongase 3                                                       |
| ENSG00000186446  | 0.000453325 | 0.003450186 | 0.020635726 | ZNF501       | zinc finger protein 501                                                           |
| ENSG00000160801  | 0.000458518 | 0.003485151 | 0.034535315 | PTH1R        | parathyroid hormone 1 receptor                                                    |
| ENSG00000162711  | 0.000466423 | 0.003538629 | 0.021724821 | NLRP3        | NLR family, pyrin domain containing 3                                             |
| ENSG00000197587  | 0.00046657  | 0.00353908  | 0.0431936   | DMBX1        | diencephalon/mesencephalon homeobox 1                                             |
| ENSG00000109667  | 0.00049066  | 0.003692238 | 0.029936755 | SLC2A9       | solute carrier family 2 (facilitated glucose transporter), member 9               |
| ENSG00000137462  | 0.000497106 | 0.003732464 | 0.132808883 | TLR2         | toll-like receptor 2                                                              |
| ENSG00000196433  | 0.000498158 | 0.003738299 | 0.132718333 | ASMT         | acetylserotonin O-methyltransferase                                               |
| ENSG00000230006  | 0.000500173 | 0.003751345 | 0.002422476 | ANKRD36BP2   | ankyrin repeat domain 36B pseudogene 2                                            |
| ENSG00000129451  | 0.000500559 | 0.003752856 | 0.016923471 | KLK10        | kallikrein-related peptidase 10                                                   |
| ENSG00000196569  | 0.000502151 | 0.003762018 | 0.026456327 | LAMA2        | laminin, alpha 2                                                                  |
| ENSG00000227028  | 0.000511955 | 0.003822112 | 0.006460544 | SLC8A1-AS1   | SLC8A1 antisense RNA 1                                                            |
| ENSG00000132938  | 0.000514241 | 0.003836364 | 0.011276431 | MTUS2        | microtubule associated tumor suppressor candidate 2                               |
| ENSG00000144810  | 0.000516524 | 0.003851979 | 0.007280765 | COL8A1       | collagen, type VIII, alpha 1                                                      |
| ENSG00000149294  | 0.000516794 | 0.00385329  | 0.008599602 | NCAM1        | neural cell adhesion molecule 1                                                   |
| ENSG00000153684  | 0.000520736 | 0.003879837 | 0.027644488 | GOLGA8F      | golgin A8 family, member F                                                        |
| ENSG00000006128  | 0.000530194 | 0.003940218 | 0.042472351 | TAC1         | tachykinin, precursor 1                                                           |
| ENSG00000112218  | 0.00053089  | 0.003944665 | 0.020873086 | GPR63        | G protein-coupled receptor 63                                                     |
| ENSG00000131773  | 0.000533566 | 0.003962379 | 0.044186786 | KHDRBS3      | KH domain containing, RNA binding, signal transduction associated 3               |
| ENSG00000105866  | 0.000536008 | 0.003976168 | 0.074693152 | SP4          | Sp4 transcription factor                                                          |
| ENSG00000164626  | 0.000536748 | 0.003980204 | 0.053672296 | KCNK5        | potassium channel, two pore domain subfamily K, member 5                          |
| ENSG00000115607  | 0.00054754  | 0.004051378 | 0.015191709 | IL18RAP      | interleukin 18 receptor accessory protein                                         |
| ENSG00000135929  | 0.000547696 | 0.004051793 | 0.045979491 | CYP27A1      | cytochrome P450, family 27, subfamily A, polypeptide 1                            |
| ENSG00000167077  | 0.000550298 | 0.004066158 | 0.015067618 | MEI1         | meiotic double-stranded break formation protein 1                                 |
| ENSG00000185274  | 0.000551341 | 0.004071362 | 0.036154326 | WBSCR17      | Williams-Beuren syndrome chromosome region 17                                     |
| ENSG00000179826  | 0.000572668 | 0.004211285 | 0.016574642 | MRGPRX3      | MAS-related GPR, member X3                                                        |
| ENSG00000225684  | 0.000573424 | 0.004214561 | 0.004797899 | FAM225B      | family with sequence similarity 225, member B (non-protein coding)                |
| ENSG00000261341  | 0.000577382 | 0.004241353 | 0.02465378  | LOC105372440 | uncharacterized LOC105372440                                                      |
| ENSG00000183629  | 0.000581819 | 0.00426933  | 0.03844199  | GOLGA8G      | golgin A8 family, member G                                                        |
| ENSG00000169436  | 0.000582245 | 0.004270917 | 0.030443606 | COL22A1      | collagen, type XXII, alpha 1                                                      |
| ENSG00000182230  | 0.00058733  | 0.004302018 | 0.014708848 | FAM153B      | family with sequence similarity 153, member B                                     |
| ENSG00000197444  | 0.000588839 | 0.004311605 | 0.0341173   | OGDHL        | oxoglutarate dehydrogenase-like                                                   |
| ENSG00000039600  | 0.000591816 | 0.004331755 | 0.030450222 | SOX30        | SRY (sex determining region Y)-box 30                                             |
| ENSG00000150722  | 0.000593455 | 0.004341409 | 0.032677055 | PPP1R1C      | protein phosphatase 1, regulatory (inhibitor) subunit 1C                          |
| ENSG00000169862  | 0.000594084 | 0.004344993 | 0.024313627 | CTNND2       | catenin (cadherin-associated protein), delta 2                                    |
| ENSG00000180785  | 0.000600197 | 0.004382862 | 0.012467307 | ORS1E1       | olfactory receptor, family 51, subfamily E, member 1                              |
| ENSG00000061918  | 0.000610751 | 0.004445576 | 0.099385811 | GUCY1B3      | guanylate cyclase 1, soluble, beta 3                                              |
| ENSG00000142347  | 0.000611583 | 0.00445013  | 0.06143343  | MYO1F        | myosin IF                                                                         |
| ENSG00000182162  | 0.000617737 | 0.004486802 | 0.022984882 | P2RY8        | purinergic receptor P2Y, G-protein coupled, 8                                     |

|                 |             |             |             |              |                                                                              |
|-----------------|-------------|-------------|-------------|--------------|------------------------------------------------------------------------------|
| ENSG00000214381 | 0.000638154 | 0.0046137   | 0.095364276 | LINC00488    | long intergenic non-protein coding RNA 488                                   |
| ENSG00000091128 | 0.000659739 | 0.004756244 | 0.022188099 | LAMB4        | laminin, beta 4                                                              |
| ENSG00000233539 | 0.000665696 | 0.004794002 | 0.042486406 | LOC730338    | uncharacterized LOC730338                                                    |
| ENSG00000162654 | 0.000673049 | 0.004837637 | 0.010354246 | GBP4         | guanylate binding protein 4                                                  |
| ENSG00000179766 | 0.000675684 | 0.004850582 | 0.023215754 | ATP8B5P      | ATPase, class I, type 8B, member 5, pseudogene                               |
| ENSG00000102935 | 0.000679395 | 0.004872924 | 0.026206716 | ZNF423       | zinc finger protein 423                                                      |
| ENSG00000135443 | 0.000680211 | 0.004876404 | 0.034374146 | KRT85        | keratin 85, type II                                                          |
| ENSG00000260691 | 0.000687165 | 0.004917399 | 0.020899507 | ANKRD20A1    | ankyrin repeat domain 20 family, member A1                                   |
| ENSG00000198681 | 0.000696221 | 0.004975207 | 0.070256398 | MAGEA1       | melanoma antigen family A1                                                   |
| ENSG00000197980 | 0.000709278 | 0.005054319 | 0.031557196 | LEKR1        | leucine, glutamate and lysine rich 1                                         |
| ENSG00000205015 | 0.000710652 | 0.005060567 | 0.087037722 | LOC400558    | uncharacterized LOC400558                                                    |
| ENSG00000188959 | 0.000719384 | 0.005116485 | 0.031111635 | C9orf152     | chromosome 9 open reading frame 152                                          |
| ENSG00000088756 | 0.00072503  | 0.005150343 | 0.006949886 | ARHGAP28     | Rho GTPase activating protein 28                                             |
| ENSG00000231453 | 0.000734993 | 0.005213839 | 0.102426451 | LINC01305    | long intergenic non-protein coding RNA 1305                                  |
| ENSG00000125910 | 0.00073556  | 0.005215238 | 0.341473001 | S1PR4        | sphingosine-1-phosphate receptor 4                                           |
| ENSG00000158813 | 0.000735574 | 0.005215238 | 0.056119293 | EDA          | ectodysplasin A                                                              |
| ENSG00000107562 | 0.000755286 | 0.005331786 | 0.056702595 | CXCL12       | chemokine (C-X-C motif) ligand 12                                            |
| ENSG00000189068 | 0.000761432 | 0.0053668   | 0.039634924 | VSTM1        | V-set and transmembrane domain containing 1                                  |
| ENSG00000146530 | 0.000764397 | 0.005382108 | 0.068423787 | VWDE         | von Willebrand factor D and EGF domains                                      |
| ENSG00000164266 | 0.000794558 | 0.005577107 | 0.057634541 | SPINK1       | serine peptidase inhibitor, Kazal type 1                                     |
| ENSG00000136573 | 0.000800144 | 0.005610518 | 0.008216753 | BLK          | BLK proto-oncogene, Src family tyrosine kinase                               |
| ENSG00000143110 | 0.000803037 | 0.00562789  | 0.044401193 | C1orf162     | chromosome 1 open reading frame 162                                          |
| ENSG00000080293 | 0.000811463 | 0.005676197 | 0.005650925 | SCTR         | secretin receptor                                                            |
| ENSG00000164694 | 0.000814427 | 0.005692042 | 0.024477755 | FNDC1        | fibronectin type III domain containing 1                                     |
| ENSG00000106031 | 0.000818618 | 0.005711533 | 0.187604975 | HOXA13       | homeobox A13                                                                 |
| ENSG00000175676 | 0.000826881 | 0.005763258 | 0.036595869 | GOLGA8DP     | golgin A8 family, member D, pseudogene                                       |
| ENSG00000157766 | 0.000827391 | 0.005765495 | 0.007999916 | ACAN         | aggregran                                                                    |
| ENSG00000152977 | 0.000827485 | 0.005765495 | 0.012446717 | ZIC1         | Zic family member 1                                                          |
| ENSG00000225492 | 0.000833291 | 0.005799    | 0.017237182 | GBP1P1       | guanylate binding protein 1, interferon-inducible pseudogene 1               |
| ENSG00000111727 | 0.000850985 | 0.005912033 | 0.111215799 | HCFC2        | host cell factor C2                                                          |
| ENSG00000216775 | 0.000854091 | 0.005928547 | 0.067325907 | LOC730101    | uncharacterized LOC730101                                                    |
| ENSG00000269821 | 0.00086757  | 0.006005733 | 0.007547643 | KCNQ1OT1     | KCNQ1 opposite strand/antisense transcript 1 (non-protein coding)            |
| ENSG00000157103 | 0.000887777 | 0.006120643 | 0.007243418 | SLC6A1       | solute carrier family 6 (neurotransmitter transporter), member 1             |
| ENSG00000162944 | 0.000889661 | 0.00612948  | 0.027330985 | RFTN2        | raftlin family member 2                                                      |
| ENSG00000234602 | 0.000890323 | 0.006131962 | 0.06832797  | MCIDAS       | multiciliate differentiation and DNA synthesis associated cell cycle protein |
| ENSG00000224417 | 0.000893479 | 0.006150579 | 0.032394131 | LOC105378138 | uncharacterized LOC105378138                                                 |
| ENSG00000215483 | 0.000913626 | 0.00627336  | 0.021422431 | LINC00598    | long intergenic non-protein coding RNA 598                                   |
| ENSG00000165309 | 0.000914393 | 0.006274774 | 0.03261973  | ARMC3        | armadillo repeat containing 3                                                |
| ENSG00000122733 | 0.000930759 | 0.006377705 | 0.021388078 | PHF24        | PHD finger protein 24                                                        |
| ENSG00000106565 | 0.000931765 | 0.006380693 | 0.019346581 | TMEM176B     | transmembrane protein 176B                                                   |
| ENSG00000178776 | 0.000936411 | 0.006406043 | 0.070704746 | C5orf46      | chromosome 5 open reading frame 46                                           |
| ENSG00000169629 | 0.000937376 | 0.00641157  | 0.09444461  | RGPD8        | RANBP2-like and GRIP domain containing 8                                     |
| ENSG00000258479 | 0.000946464 | 0.006467213 | 0.080386288 | LINC00640    | long intergenic non-protein coding RNA 640                                   |
| ENSG00000132185 | 0.000966667 | 0.006588676 | 0.047768062 | FCRLA        | Fc receptor-like A                                                           |
| ENSG00000153902 | 0.000973265 | 0.006628371 | 0.110034518 | LGI4         | leucine-rich repeat LGI family, member 4                                     |
| ENSG00000128655 | 0.000973305 | 0.006628371 | 0.05105011  | PDE11A       | phosphodiesterase 11A                                                        |
| ENSG00000149050 | 0.000976692 | 0.006649213 | 0.058467663 | ZNF214       | zinc finger protein 214                                                      |
| ENSG00000157423 | 0.00098025  | 0.00666786  | 0.021508175 | HYDIN        | HYDIN, axonemal central pair apparatus protein                               |
| ENSG00000197594 | 0.000993247 | 0.006745004 | 0.053411856 | ENPP1        | ectonucleotide pyrophosphatase/phosphodiesterase 1                           |
| ENSG00000233816 | 0.000998645 | 0.006778268 | 0.093699979 | IFNA13       | interferon, alpha 13                                                         |
| ENSG00000163803 | 0.001021884 | 0.006919852 | 0.022311754 | PLB1         | phospholipase B1                                                             |
| ENSG00000123453 | 0.001022499 | 0.006921712 | 0.018156768 | SARDH        | sarcosine dehydrogenase                                                      |
| ENSG00000182263 | 0.001023442 | 0.00692695  | 0.051813043 | FIGN         | figetin                                                                      |
| ENSG00000078295 | 0.001027358 | 0.006950541 | 0.004551709 | ADCY2        | adenylate cyclase 2 (brain)                                                  |
| ENSG00000172410 | 0.00104092  | 0.007031215 | 0.079177179 | INSL5        | insulin-like 5                                                               |
| ENSG00000261231 | 0.00104442  | 0.007051353 | 0.007403586 | LOC101927132 | uncharacterized LOC101927132                                                 |
| ENSG00000168280 | 0.001062966 | 0.007157577 | 0.027090439 | KIF5C        | kinesin family member 5C                                                     |
| ENSG00000249231 | 0.001071853 | 0.007211455 | 0.01636026  | CASC16       | cancer susceptibility candidate 16 (non-protein coding)                      |
| ENSG00000175874 | 0.001076234 | 0.007234949 | 0.079067233 | CREG2        | cellular repressor of E1A-stimulated genes 2                                 |
| ENSG00000145287 | 0.001079961 | 0.007252819 | 0.033838288 | PLAC8        | placenta-specific 8                                                          |
| ENSG00000125872 | 0.00108507  | 0.007281126 | 0.018623492 | LRRN4        | leucine rich repeat neuronal 4                                               |
| ENSG00000141497 | 0.001085993 | 0.007286118 | 0.061946004 | ZMYND15      | zinc finger, MYND-type containing 15                                         |
| ENSG00000100055 | 0.001094534 | 0.007338397 | 0.050769301 | CYTH4        | cytohesin 4                                                                  |
| ENSG00000119913 | 0.001113407 | 0.007439401 | 0.035412136 | TECTB        | tectorin beta                                                                |
| ENSG00000057593 | 0.001126683 | 0.007515772 | 0.009273754 | F7           | coagulation factor VII (serum prothrombin conversion accelerator)            |

|                 |             |             |             |              |                                                                          |
|-----------------|-------------|-------------|-------------|--------------|--------------------------------------------------------------------------|
| ENSG00000281706 | 0.001128286 | 0.00752277  | 0.029259899 | LINC01012    | long intergenic non-protein coding RNA 1012                              |
| ENSG00000039987 | 0.001143077 | 0.007602714 | 0.016394444 | BEST2        | bestrophin 2                                                             |
| ENSG00000139737 | 0.001150323 | 0.007643414 | 0.06124153  | SLAIN1       | SLAIN motif family, member 1                                             |
| ENSG00000165197 | 0.001159508 | 0.007695657 | 0.129099375 | FIGF         | c-fos induced growth factor (vascular endothelial growth factor D)       |
| ENSG00000159904 | 0.001169314 | 0.007745591 | 0.026255508 | ZNF890P      | zinc finger protein 890, pseudogene                                      |
| ENSG00000156711 | 0.001175583 | 0.007780787 | 0.076097856 | MAPK13       | mitogen-activated protein kinase 13                                      |
| ENSG00000144550 | 0.001197415 | 0.007898928 | 0.072628224 | CPNE9        | copine family member IX                                                  |
| ENSG00000017483 | 0.001207595 | 0.007956452 | 0.065581284 | SLC38A5      | solute carrier family 38, member 5                                       |
| ENSG00000134258 | 0.001209684 | 0.007966345 | 0.04204786  | VTCN1        | V-set domain containing T cell activation inhibitor 1                    |
| ENSG00000197446 | 0.001219271 | 0.008019103 | 0.008020571 | CYP2F1       | cytochrome P450, family 2, subfamily F, polypeptide 1                    |
| ENSG00000277632 | 0.001233719 | 0.008104963 | 0.058798312 | CCL3         | chemokine (C-C motif) ligand 3                                           |
| ENSG00000267551 | 0.001253444 | 0.008213348 | 0.120948555 | LOC100996351 | uncharacterized LOC100996351                                             |
| ENSG00000162706 | 0.001276011 | 0.008341264 | 0.052552175 | CADM3        | cell adhesion molecule 3                                                 |
| ENSG00000132518 | 0.001276818 | 0.008345023 | 0.009453319 | GUCY2D       | guanylate cyclase 2D, membrane (retina-specific)                         |
| ENSG00000237292 | 0.001294093 | 0.008433556 | 0.105053073 | LOC101928973 | uncharacterized LOC101928973                                             |
| ENSG00000186417 | 0.001317193 | 0.008564911 | 0.007951825 | GLDN         | gliomedin                                                                |
| ENSG00000113763 | 0.001320922 | 0.008585041 | 0.0312833   | UNC5A        | unc-5 netrin receptor A                                                  |
| ENSG00000139287 | 0.001322293 | 0.008592586 | 0.003939375 | TPH2         | tryptophan hydroxylase 2                                                 |
| ENSG00000111344 | 0.001323478 | 0.00859754  | 0.014689487 | RASAL1       | RAS protein activator like 1 (GAP1 like)                                 |
| ENSG00000158560 | 0.001325004 | 0.008606081 | 0.018441282 | DYNC111      | dynein, cytoplasmic 1, intermediate chain 1                              |
| ENSG00000182795 | 0.001336576 | 0.008667413 | 0.058062439 | C1orf116     | chromosome 1 open reading frame 116                                      |
| ENSG00000012817 | 0.001352668 | 0.008756426 | 0.014797914 | KDM5D        | lysine (K)-specific demethylase 5D                                       |
| ENSG00000162723 | 0.001361913 | 0.008807875 | 0.300623788 | SLAMF9       | SLAM family member 9                                                     |
| ENSG00000162040 | 0.001390963 | 0.008965842 | 0.154391212 | HS3ST6       | heparan sulfate (glucosamine) 3-O-sulfotransferase 6                     |
| ENSG00000204334 | 0.001395965 | 0.008993813 | 0.109964535 | ERICH2       | glutamate-rich 2                                                         |
| ENSG00000168634 | 0.001417476 | 0.009113657 | 0.011375577 | WFDC13       | WAP four-disulfide core domain 13                                        |
| ENSG00000107187 | 0.001434482 | 0.009209909 | 0.041904162 | LHX3         | LIM homeobox 3                                                           |
| ENSG00000242715 | 0.001488333 | 0.009506186 | 0.031851379 | CCDC169      | coiled-coil domain containing 169                                        |
| ENSG00000169896 | 0.001501382 | 0.009574513 | 0.081119993 | ITGAM        | integrin, alpha M (complement component 3 receptor 3 subunit)            |
| ENSG00000165269 | 0.001535027 | 0.009758504 | 0.090458127 | AQP7         | aquaporin 7                                                              |
| ENSG00000087250 | 0.001542805 | 0.009804888 | 0.054236823 | MT3          | metallothionein 3                                                        |
| ENSG00000251085 | 0.001564973 | 0.009921001 | 0.091788134 | LOC101927230 | uncharacterized LOC101927230                                             |
| ENSG00000205420 | 0.00156709  | 0.009929783 | 0.014534096 | KRT6A        | keratin 6A, type II                                                      |
| ENSG00000128422 | 0.001590345 | 0.010047426 | 0.070841975 | KRT17        | keratin 17, type I                                                       |
| ENSG00000188508 | 0.001602696 | 0.010112906 | 0.059311499 | KRTDAP       | keratinocyte differentiation-associated protein                          |
| ENSG00000205057 | 0.001632226 | 0.010272177 | 0.140723167 | CLUU1OS      | chronic lymphocytic leukemia up-regulated 1 opposite strand              |
| ENSG00000183690 | 0.001644248 | 0.010336654 | 0.042830371 | EFHC2        | EF-hand domain (C-terminal) containing 2                                 |
| ENSG00000000938 | 0.001648732 | 0.010356846 | 0.007382865 | FGR          | FGR proto-oncogene, Src family tyrosine kinase                           |
| ENSG00000237515 | 0.001663123 | 0.010427941 | 0.009897437 | SHISA9       | shisa family member 9                                                    |
| ENSG00000232645 | 0.001671914 | 0.010475555 | 0.101294969 | LINC01431    | long intergenic non-protein coding RNA 1431                              |
| ENSG00000196263 | 0.001691516 | 0.010584778 | 0.036811818 | ZNF471       | zinc finger protein 471                                                  |
| ENSG00000254415 | 0.00169923  | 0.010621622 | 0.028866763 | SIGLEC14     | sialic acid binding Ig-like lectin 14                                    |
| ENSG00000197085 | 0.001702653 | 0.010634853 | 0.010873859 | NPSR1-AS1    | NPSR1 antisense RNA 1                                                    |
| ENSG00000149972 | 0.001717197 | 0.010705991 | 0.008113085 | CNTN5        | contactin 5                                                              |
| ENSG00000188112 | 0.001725682 | 0.010750662 | 0.027200363 | C6orf132     | chromosome 6 open reading frame 132                                      |
| ENSG00000203926 | 0.001728102 | 0.010764091 | 0.035401665 | SPANXA2      | SPANX family, member A2                                                  |
| ENSG00000276289 | 0.001728915 | 0.010766212 | 0.029289124 | LOC102723475 | putative uncharacterized protein LOC388820                               |
| ENSG00000223393 | 0.001733189 | 0.010784228 | 0.065190577 | LOC101927604 | uncharacterized LOC101927604                                             |
| ENSG00000149418 | 0.001739855 | 0.010819094 | 0.029164939 | ST14         | suppression of tumorigenicity 14 (colon carcinoma)                       |
| ENSG00000138376 | 0.001760989 | 0.010928817 | 0.053993671 | BARD1        | BRCA1 associated RING domain 1                                           |
| ENSG00000170477 | 0.001766488 | 0.010951258 | 0.014423023 | KRT4         | keratin 4, type II                                                       |
| ENSG00000162999 | 0.001779569 | 0.011004954 | 0.084783532 | DUSP19       | dual specificity phosphatase 19                                          |
| ENSG00000115041 | 0.001785613 | 0.011037893 | 0.062051359 | KCNIP3       | Kv channel interacting protein 3, calsenilin                             |
| ENSG00000095637 | 0.001785924 | 0.01103814  | 0.015803987 | SORBS1       | sorbin and SH3 domain containing 1                                       |
| ENSG00000105383 | 0.001816904 | 0.011193935 | 0.013924102 | CD33         | CD33 molecule                                                            |
| ENSG00000167011 | 0.001820237 | 0.011212771 | 0.030163479 | NAT16        | N-acetyltransferase 16 (GCN5-related, putative)                          |
| ENSG00000166603 | 0.001844275 | 0.011336207 | 0.033351888 | MC4R         | melanocortin 4 receptor                                                  |
| ENSG00000177301 | 0.001851715 | 0.0113757   | 0.00317796  | KCNA2        | potassium channel, voltage gated shaker related subfamily A, member 2    |
| ENSG00000153563 | 0.001862061 | 0.011428909 | 0.050140725 | CD8A         | CD8a molecule                                                            |
| ENSG00000141469 | 0.001893738 | 0.011600604 | 0.004220655 | SLC14A1      | solute carrier family 14 (urea transporter), member 1 (Kidd blood group) |
| ENSG00000135226 | 0.001913563 | 0.011702682 | 0.032073917 | UGT2B28      | UDP glucuronosyltransferase 2 family, polypeptide B28                    |
| ENSG00000183160 | 0.001918167 | 0.011729078 | 0.016540877 | TMEM119      | transmembrane protein 119                                                |
| ENSG00000183150 | 0.00194667  | 0.011889084 | 0.044976686 | GPR19        | G protein-coupled receptor 19                                            |
| ENSG00000231674 | 0.001987636 | 0.012113838 | 0.019486417 | LINC00410    | long intergenic non-protein coding RNA 410                               |
| ENSG00000152315 | 0.001994129 | 0.012144321 | 0.061805446 | KCNK13       | potassium channel, two pore domain subfamily K, member 13                |

|                 |             |             |             |           |                                                                               |
|-----------------|-------------|-------------|-------------|-----------|-------------------------------------------------------------------------------|
| ENSG00000204624 | 0.002039038 | 0.01237894  | 0.022436988 | PTCHD2    | patched domain containing 2                                                   |
| ENSG00000163285 | 0.002056454 | 0.012467943 | 0.015992549 | GABRG1    | gamma-aminobutyric acid (GABA) A receptor, gamma 1                            |
| ENSG00000168348 | 0.002059971 | 0.012483967 | 0.014786645 | INSM2     | insulinoma-associated 2                                                       |
| ENSG00000109181 | 0.002065262 | 0.012510167 | 0.040142058 | UGT2B10   | UDP glucuronosyltransferase 2 family, polypeptide B10                         |
| ENSG00000163006 | 0.002075814 | 0.012564736 | 0.098414104 | CCDC138   | coiled-coil domain containing 138                                             |
| ENSG00000176092 | 0.002087394 | 0.01262732  | 0.026129955 | AIM1L     | absent in melanoma 1-like                                                     |
| ENSG00000074317 | 0.002098743 | 0.012679024 | 0.02146475  | SNCB      | synuclein, beta                                                               |
| ENSG00000136383 | 0.002103829 | 0.012705981 | 0.039449424 | ALPK3     | alpha-kinase 3                                                                |
| ENSG00000213214 | 0.002111348 | 0.012740435 | 0.024321275 | ARHGEF35  | Rho guanine nucleotide exchange factor (GEF) 35                               |
| ENSG00000133962 | 0.002124858 | 0.012812076 | 0.009103988 | CATSPERB  | catsper channel auxiliary subunit beta                                        |
| ENSG00000064787 | 0.002128276 | 0.01283079  | 0.010095816 | BCAS1     | breast carcinoma amplified sequence 1                                         |
| ENSG00000018625 | 0.002158412 | 0.012987472 | 0.021780299 | ATP1A2    | ATPase, Na+/K+ transporting, alpha 2 polypeptide                              |
| ENSG00000071909 | 0.002216453 | 0.013281759 | 0.007154868 | MYO3B     | myosin IIIB                                                                   |
| ENSG00000167207 | 0.002250507 | 0.013456118 | 0.008270972 | NOD2      | nucleotide-binding oligomerization domain containing 2                        |
| ENSG00000171435 | 0.002252538 | 0.01346628  | 0.029137741 | KSR2      | kinase suppressor of ras 2                                                    |
| ENSG00000164045 | 0.002269643 | 0.013560574 | 0.083140599 | CDC25A    | cell division cycle 25A                                                       |
| ENSG00000250312 | 0.002309473 | 0.013766565 | 0.043833011 | ZNF718    | zinc finger protein 718                                                       |
| ENSG00000255587 | 0.002373333 | 0.014099411 | 0.06230469  | RAB44     | RAB44, member RAS oncogene family                                             |
| ENSG00000214146 | 0.002383484 | 0.014149397 | 0.028840252 | LOC647323 | uncharacterized LOC647323                                                     |
| ENSG00000271550 | 0.002439595 | 0.014450891 | 0.120181946 | BNIP3P11  | BCL2/adenovirus E1B 19kDa interacting protein 3 pseudogene 11                 |
| ENSG00000261279 | 0.002457378 | 0.014547057 | 0.054130402 | ULK4P1    | ULK4 pseudogene 1                                                             |
| ENSG00000187955 | 0.002494926 | 0.014737907 | 0.0096505   | COL14A1   | collagen, type XIV, alpha 1                                                   |
| ENSG00000139714 | 0.002498594 | 0.014755293 | 0.045480841 | MORN3     | MORN repeat containing 3                                                      |
| ENSG00000136828 | 0.002514869 | 0.014829897 | 0.052791367 | RALGPS1   | Ral GEF with PH domain and SH3 binding motif 1                                |
| ENSG00000128285 | 0.0026379   | 0.01542361  | 0.004979103 | MCHR1     | melanin-concentrating hormone receptor 1                                      |
| ENSG00000171551 | 0.002650028 | 0.015483404 | 0.044929121 | ECEL1     | endothelin converting enzyme-like 1                                           |
| ENSG00000181984 | 0.002661606 | 0.015539901 | 0.027664929 | GOLGA8EP  | golgin A8 family, member E, pseudogene                                        |
| ENSG00000169918 | 0.002667062 | 0.015569525 | 0.012090552 | OTUD7A    | OTU deubiquitinase 7A                                                         |
| ENSG00000136514 | 0.002699131 | 0.015724941 | 0.027448922 | RTP4      | receptor (chemosensory) transporter protein 4                                 |
| ENSG00000224383 | 0.002699478 | 0.015724941 | 0.127541319 | PRR29     | proline rich 29                                                               |
| ENSG00000115361 | 0.002706392 | 0.015760708 | 0.031357548 | ACADL     | acyl-CoA dehydrogenase, long chain                                            |
| ENSG00000215458 | 0.002717472 | 0.015809406 | 0.006830302 | AATBC     | apoptosis associated transcript in bladder cancer                             |
| ENSG00000169181 | 0.00274328  | 0.015928622 | 0.004846652 | GSG1L     | GSG1-like                                                                     |
| ENSG00000184845 | 0.002755831 | 0.01599144  | 0.075940395 | DRD1      | dopamine receptor D1                                                          |
| ENSG00000109182 | 0.002758113 | 0.015998943 | 0.00802594  | CWH43     | cell wall biogenesis 43 C-terminal homolog                                    |
| ENSG00000104848 | 0.002779092 | 0.016098885 | 0.022084616 | KCNA7     | potassium channel, voltage gated shaker related subfamily A, member 7         |
| ENSG00000176040 | 0.002780202 | 0.016103024 | 0.054384097 | TMPRSS7   | transmembrane protease, serine 7                                              |
| ENSG00000013725 | 0.002835941 | 0.016374625 | 0.007955242 | CD6       | CD6 molecule                                                                  |
| ENSG00000147606 | 0.002844238 | 0.016415545 | 0.029399627 | SLC26A7   | solute carrier family 26 (anion exchanger), member 7                          |
| ENSG00000070729 | 0.002846682 | 0.016425532 | 0.010574435 | CNGB1     | cyclic nucleotide gated channel beta 1                                        |
| ENSG00000215808 | 0.002864773 | 0.016505991 | 0.162449763 | LINC01139 | long intergenic non-protein coding RNA 1139                                   |
| ENSG00000171446 | 0.002866707 | 0.01651246  | 0.029919846 | KRT27     | keratin 27, type I                                                            |
| ENSG00000165379 | 0.002883025 | 0.016587682 | 0.006313106 | LRFV5     | leucine rich repeat and fibronectin type III domain containing 5              |
| ENSG00000166682 | 0.002885899 | 0.016599527 | 0.058137616 | TMPRSS5   | transmembrane protease, serine 5                                              |
| ENSG00000176438 | 0.002908162 | 0.016715776 | 0.005089679 | SYNE3     | spectrin repeat containing, nuclear envelope family member 3                  |
| ENSG00000234199 | 0.002929453 | 0.016821532 | 0.091338214 | LINC01191 | long intergenic non-protein coding RNA 1191                                   |
| ENSG00000169064 | 0.002947477 | 0.016905952 | 0.035323401 | ZBBX      | zinc finger, B-box domain containing                                          |
| ENSG00000198939 | 0.002971022 | 0.017014636 | 0.046709585 | ZFP2      | ZFP2 zinc finger protein                                                      |
| ENSG00000110675 | 0.003017651 | 0.017233198 | 0.021551817 | ELMOD1    | ELMO/CED-12 domain containing 1                                               |
| ENSG00000204103 | 0.003027494 | 0.01727972  | 0.042496289 | MAFB      | v-maf avian musculoaponeurotic fibrosarcoma oncogene homolog B                |
| ENSG00000249911 | 0.003047065 | 0.017350077 | 0.044671461 | LINC01265 | long intergenic non-protein coding RNA 1265                                   |
| ENSG00000163216 | 0.003051046 | 0.017367884 | 0.089149972 | SPRR2D    | small proline-rich protein 2D                                                 |
| ENSG00000179873 | 0.003069597 | 0.017461281 | 0.016082669 | NLRP11    | NLR family, pyrin domain containing 11                                        |
| ENSG00000116396 | 0.003075364 | 0.017489202 | 0.068466267 | KCNK4     | potassium channel, voltage gated Shaw related subfamily C, member 4           |
| ENSG00000160883 | 0.003084983 | 0.017536556 | 0.040846105 | HK3       | hexokinase 3 (white cell)                                                     |
| ENSG00000180861 | 0.003113748 | 0.017664418 | 0.007822232 | LINC01559 | long intergenic non-protein coding RNA 1559                                   |
| ENSG00000229563 | 0.003121093 | 0.017687495 | 0.01529469  | LINC01204 | long intergenic non-protein coding RNA 1204                                   |
| ENSG00000227630 | 0.003148215 | 0.017823832 | 0.003003614 | LINC01132 | long intergenic non-protein coding RNA 1132                                   |
| ENSG00000237594 | 0.003153643 | 0.017847383 | 0.045145219 | LOC150051 | homeobox protein cut-like 1                                                   |
| ENSG00000250979 | 0.003167184 | 0.017908818 | 0.017655905 | LOC392232 | transient receptor potential cation channel, subfamily A, member 1 pseudogene |
| ENSG00000237877 | 0.003242008 | 0.018250804 | 0.099636783 | LINC01473 | long intergenic non-protein coding RNA 1473                                   |
| ENSG00000133661 | 0.003245028 | 0.018260235 | 0.116280124 | SFTPD     | surfactant protein D                                                          |
| ENSG00000197410 | 0.003274942 | 0.018416795 | 0.007543053 | DCHS2     | dachsous cadherin-related 2                                                   |
| ENSG00000127084 | 0.003307382 | 0.018555277 | 0.014374788 | FGD3      | FYVE, RhoGEF and PH domain containing 3                                       |
| ENSG00000007314 | 0.003360027 | 0.018821516 | 0.020769911 | SCN4A     | sodium channel, voltage gated, type IV alpha subunit                          |

|                 |             |             |             |              |                                                                  |
|-----------------|-------------|-------------|-------------|--------------|------------------------------------------------------------------|
| ENSG00000188883 | 0.003402022 | 0.01902273  | 0.064818264 | KLRG2        | killer cell lectin-like receptor subfamily G, member 2           |
| ENSG00000076716 | 0.003410084 | 0.019065192 | 0.022818967 | GPC4         | glypican 4                                                       |
| ENSG00000021645 | 0.003429402 | 0.019151866 | 0.013922501 | NRXN3        | neurexin 3                                                       |
| ENSG00000127377 | 0.003438494 | 0.019189775 | 0.009202918 | CRYGN        | crystallin, gamma N                                              |
| ENSG00000267254 | 0.003442185 | 0.019199846 | 0.191766594 | ZNF790-AS1   | ZNF790 antisense RNA 1                                           |
| ENSG00000148483 | 0.003447267 | 0.019222929 | 0.021939227 | TMEM236      | transmembrane protein 236                                        |
| ENSG00000072133 | 0.003459858 | 0.019281574 | 0.091880762 | RPS6KA6      | ribosomal protein S6 kinase, 90kDa, polypeptide 6                |
| ENSG00000171772 | 0.003486633 | 0.019416821 | 0.008846877 | SYCE1        | synaptonemal complex central element protein 1                   |
| ENSG00000175691 | 0.003527755 | 0.01959281  | 0.144241363 | ZNF77        | zinc finger protein 77                                           |
| ENSG00000205269 | 0.003538102 | 0.019645292 | 0.079110827 | TMEM170B     | transmembrane protein 170B                                       |
| ENSG00000163817 | 0.003547547 | 0.019682385 | 0.010486735 | SLC6A20      | solute carrier family 6 (proline IMINO transporter), member 20   |
| ENSG00000182218 | 0.003588931 | 0.019871374 | 0.018891649 | HHIPL1       | HHIP-like 1                                                      |
| ENSG00000152454 | 0.003643046 | 0.02013541  | 0.153719939 | ZNF256       | zinc finger protein 256                                          |
| ENSG00000196132 | 0.003653282 | 0.02017776  | 0.013343227 | MYT1         | myelin transcription factor 1                                    |
| ENSG00000166394 | 0.003662348 | 0.020209665 | 0.019012088 | CYB5R2       | cytochrome b5 reductase 2                                        |
| ENSG00000083782 | 0.003663443 | 0.020212476 | 0.009695339 | EPYC         | epiphycan                                                        |
| ENSG00000250634 | 0.003703411 | 0.02040258  | 0.004896071 | LINC01182    | long intergenic non-protein coding RNA 1182                      |
| ENSG00000065328 | 0.003764367 | 0.020671272 | 0.105374356 | MCM10        | minichromosome maintenance 10 replication initiation factor      |
| ENSG00000206596 | 0.003780677 | 0.020746849 | 0.152973828 | RNU1-27P     | RNA, U1 small nuclear 27, pseudogene                             |
| ENSG00000182771 | 0.003846148 | 0.021052219 | 0.120421049 | GRID1        | glutamate receptor, ionotropic, delta 1                          |
| ENSG00000100170 | 0.00384973  | 0.02106899  | 0.012877533 | SLC5A1       | solute carrier family 5 (sodium/glucose cotransporter), member 1 |
| ENSG00000164761 | 0.003859646 | 0.021111909 | 0.02975882  | TNFRSF11B    | tumor necrosis factor receptor superfamily, member 11b           |
| ENSG00000234965 | 0.003900378 | 0.021300376 | 0.06017324  | SHISA8       | shisa family member 8                                            |
| ENSG00000065609 | 0.003905202 | 0.02131814  | 0.051065173 | SNAP91       | synaptosomal-associated protein, 91kDa                           |
| ENSG00000269834 | 0.003979981 | 0.021650886 | 0.045566427 | ZNF528-AS1   | ZNF528 antisense RNA 1                                           |
| ENSG00000242600 | 0.003982715 | 0.021662862 | 0.066029809 | MBL1P        | mannose-binding lectin (protein A) 1, pseudogene                 |
| ENSG00000232139 | 0.003985606 | 0.021672798 | 0.030273689 | LINC00867    | long intergenic non-protein coding RNA 867                       |
| ENSG00000117595 | 0.003992018 | 0.021704765 | 0.013933229 | IRF6         | interferon regulatory factor 6                                   |
| ENSG00000109424 | 0.004012109 | 0.021805269 | 0.055642826 | UCP1         | uncoupling protein 1 (mitochondrial, proton carrier)             |
| ENSG00000150510 | 0.004066692 | 0.022060693 | 0.086165984 | FAM124A      | family with sequence similarity 124A                             |
| ENSG00000224189 | 0.004113537 | 0.022279198 | 0.034769071 | HAGLR        | HOXD antisense growth-associated long non-coding RNA             |
| ENSG00000178462 | 0.004137491 | 0.022394039 | 0.045567561 | TUBAL3       | tubulin, alpha-like 3                                            |
| ENSG00000134769 | 0.00415365  | 0.022469551 | 0.013111345 | DTNA         | dystrobrevin, alpha                                              |
| ENSG00000167851 | 0.004225297 | 0.022802605 | 0.014018565 | CD300A       | CD300a molecule                                                  |
| ENSG00000182950 | 0.004269939 | 0.022997802 | 0.283750857 | ODF3L1       | outer dense fiber of sperm tails 3-like 1                        |
| ENSG00000141540 | 0.004283513 | 0.023055059 | 0.083004467 | TTYH2        | tweety family member 2                                           |
| ENSG00000104722 | 0.004300345 | 0.023129766 | 0.017305822 | NEFM         | neurofilament, medium polypeptide                                |
| ENSG00000188487 | 0.004344151 | 0.023323461 | 0.035832186 | INSC         | inscuteable homolog (Drosophila)                                 |
| ENSG00000129682 | 0.004378421 | 0.023488871 | 0.00926258  | FGF13        | fibroblast growth factor 13                                      |
| ENSG00000156299 | 0.00443863  | 0.023761783 | 0.037341968 | TIAM1        | T-cell lymphoma invasion and metastasis 1                        |
| ENSG00000125492 | 0.004553632 | 0.024313502 | 0.03604648  | BARHL1       | BarH-like homeobox 1                                             |
| ENSG00000168546 | 0.004557366 | 0.024330254 | 0.050545522 | GFRA2        | GDNF family receptor alpha 2                                     |
| ENSG00000173083 | 0.004588726 | 0.024472003 | 0.041611633 | HPSE         | heparanase                                                       |
| ENSG00000198108 | 0.004593258 | 0.024486552 | 0.105901351 | CHSY3        | chondroitin sulfate synthase 3                                   |
| ENSG00000140470 | 0.004603496 | 0.024516254 | 0.011900217 | ADAMTS17     | ADAM metalloproteinase with thrombospondin type 1 motif, 17      |
| ENSG00000204381 | 0.004633082 | 0.024650444 | 0.044265866 | LAYN         | layilin                                                          |
| ENSG00000221878 | 0.00466488  | 0.024777535 | 0.003607409 | PSG7         | pregnancy specific beta-1-glycoprotein 7 (gene/pseudogene)       |
| ENSG00000169403 | 0.004725507 | 0.025060329 | 0.025343873 | PTAFR        | platelet-activating factor receptor                              |
| ENSG00000129810 | 0.004761425 | 0.025224527 | 0.119956106 | SGOL1        | shugoshin-like 1 (S. pombe)                                      |
| ENSG00000174576 | 0.004789189 | 0.025348525 | 0.035412144 | NPAS4        | neuronal PAS domain protein 4                                    |
| ENSG00000121797 | 0.004812608 | 0.025446018 | 0.053428951 | CCRL2        | chemokine (C-C motif) receptor-like 2                            |
| ENSG00000188032 | 0.004891747 | 0.02581752  | 0.015898507 | C19orf67     | chromosome 19 open reading frame 67                              |
| ENSG00000122574 | 0.00492429  | 0.025972438 | 0.051638763 | WIPF3        | WAS/WASL interacting protein family, member 3                    |
| ENSG00000178217 | 0.004926055 | 0.025978382 | 0.00859399  | SH2D4B       | SH2 domain containing 4B                                         |
| ENSG00000115339 | 0.004926759 | 0.02597873  | 0.031342852 | GALNT3       | polypeptide N-acetylgalactosaminyltransferase 3                  |
| ENSG00000198963 | 0.004947741 | 0.026075861 | 0.002087298 | RORB         | RAR-related orphan receptor B                                    |
| ENSG00000106013 | 0.004956314 | 0.026110805 | 0.065059625 | ANKRD7       | ankyrin repeat domain 7                                          |
| ENSG00000170743 | 0.004957916 | 0.026112591 | 0.014068687 | SYT9         | synaptotagmin IX                                                 |
| ENSG00000229015 | 0.004972187 | 0.026168721 | 0.041079895 | LOC100506790 | uncharacterized LOC100506790                                     |
| ENSG00000161180 | 0.005020227 | 0.026392975 | 0.013792018 | CCDC116      | coiled-coil domain containing 116                                |
| ENSG00000140968 | 0.00503332  | 0.026441327 | 0.017285484 | IRF8         | interferon regulatory factor 8                                   |
| ENSG00000152969 | 0.005035277 | 0.026448193 | 0.009175561 | JAKMIP1      | janus kinase and microtubule interacting protein 1               |
| ENSG00000116329 | 0.005040601 | 0.026465919 | 0.012100254 | OPRD1        | opioid receptor, delta 1                                         |
| ENSG00000070808 | 0.005051271 | 0.026515104 | 0.042773982 | CAMK2A       | calcium/calmodulin-dependent protein kinase II alpha             |
| ENSG00000185904 | 0.005053534 | 0.02652356  | 0.087991001 | LINC00839    | long intergenic non-protein coding RNA 839                       |

|                 |             |             |             |              |                                                                                     |
|-----------------|-------------|-------------|-------------|--------------|-------------------------------------------------------------------------------------|
| ENSG00000206026 | 0.005079951 | 0.026621034 | 0.002741715 | SMIM21       | small integral membrane protein 21                                                  |
| ENSG00000134533 | 0.005115584 | 0.026770794 | 0.022783854 | RERG         | RAS-like, estrogen-regulated, growth inhibitor                                      |
| ENSG00000172201 | 0.005118243 | 0.026780341 | 0.03488459  | ID4          | inhibitor of DNA binding 4, dominant negative helix-loop-helix protein              |
| ENSG00000152785 | 0.005139288 | 0.026869739 | 0.007183323 | BMP3         | bone morphogenetic protein 3                                                        |
| ENSG00000141505 | 0.005163044 | 0.026980087 | 0.175158429 | ASGR1        | asialoglycoprotein receptor 1                                                       |
| ENSG00000251247 | 0.005276061 | 0.027467057 | 0.031126698 | ZNF345       | zinc finger protein 345                                                             |
| ENSG00000120471 | 0.005400324 | 0.028036517 | 0.02061314  | TP53AI1      | tumor protein p53 regulated apoptosis inducing protein 1                            |
| ENSG00000248771 | 0.005409162 | 0.028057355 | 0.071919185 | LINC01207    | long intergenic non-protein coding RNA 1207                                         |
| ENSG00000137251 | 0.005451764 | 0.02824236  | 0.027048539 | TINAG        | tubulointerstitial nephritis antigen                                                |
| ENSG00000185668 | 0.005460159 | 0.028275521 | 0.020959374 | POU3F1       | POU class 3 homeobox 1                                                              |
| ENSG00000151883 | 0.005506774 | 0.028465765 | 0.021871376 | PARP8        | poly (ADP-ribose) polymerase family, member 8                                       |
| ENSG00000116106 | 0.005519123 | 0.028515119 | 0.118115933 | EPHA4        | EPH receptor A4                                                                     |
| ENSG00000116703 | 0.005536152 | 0.028588588 | 0.031997655 | PDC          | phosducin                                                                           |
| ENSG00000113946 | 0.005546426 | 0.028634384 | 0.038239964 | CLDN16       | claudin 16                                                                          |
| ENSG00000140623 | 0.005590525 | 0.028821853 | 0.033225776 | 42625        | septin 12                                                                           |
| ENSG00000235480 | 0.005605373 | 0.028880121 | 0.016260382 | LOC105373496 | uncharacterized LOC105373496                                                        |
| ENSG00000214407 | 0.00560862  | 0.028885883 | 0.155547474 | LOC152225    | uncharacterized LOC152225                                                           |
| ENSG00000170681 | 0.005613173 | 0.028902851 | 0.119619989 | MURC         | muscle-related coiled-coil protein                                                  |
| ENSG00000164796 | 0.005620194 | 0.028930188 | 0.014027548 | CSMD3        | CUB and Sushi multiple domains 3                                                    |
| ENSG00000162951 | 0.005647933 | 0.029047938 | 0.003146493 | LRRTM1       | leucine rich repeat transmembrane neuronal 1                                        |
| ENSG00000149131 | 0.005722079 | 0.029388633 | 0.017199864 | SERPING1     | serpin peptidase inhibitor, clade G (C1 inhibitor), member 1                        |
| ENSG00000233776 | 0.005732102 | 0.029432499 | 0.165564289 | LINC01251    | long intergenic non-protein coding RNA 1251                                         |
| ENSG00000106526 | 0.005742888 | 0.029476733 | 0.017862941 | ACTR3C       | ARP3 actin-related protein 3 homolog C (yeast)                                      |
| ENSG00000118513 | 0.005799915 | 0.029717247 | 0.033627981 | MYB          | v-myb avian myeloblastosis viral oncogene homolog                                   |
| ENSG00000146950 | 0.0058431   | 0.029930727 | 0.033445587 | SHROOM2      | shroom family member 2                                                              |
| ENSG00000102384 | 0.00585122  | 0.029953033 | 0.062842032 | CENPI        | centromere protein 1                                                                |
| ENSG00000168004 | 0.005931523 | 0.030292206 | 0.019010981 | HRASL5       | HRAS-like suppressor family, member 5                                               |
| ENSG00000186086 | 0.005946054 | 0.030347386 | 0.029549305 | NBPF6        | neuroblastoma breakpoint family, member 6                                           |
| ENSG00000164512 | 0.006056545 | 0.03083401  | 0.031985937 | ANKRD55      | ankyrin repeat domain 55                                                            |
| ENSG00000173295 | 0.006078097 | 0.030926157 | 0.152643324 | FAM86B3P     | family with sequence similarity 86, member A pseudogene                             |
| ENSG00000090382 | 0.006150263 | 0.031252514 | 0.028805504 | LYZ          | lysozyme                                                                            |
| ENSG00000181450 | 0.006197644 | 0.03146187  | 0.123947304 | ZNF678       | zinc finger protein 678                                                             |
| ENSG00000183148 | 0.006255802 | 0.031701774 | 0.01508871  | ANKRD20A2    | ankyrin repeat domain 20 family, member A2                                          |
| ENSG00000165259 | 0.006292668 | 0.031854728 | 0.072992864 | HDX          | highly divergent homeobox                                                           |
| ENSG00000259954 | 0.006295845 | 0.031857117 | 0.099610446 | IL21R-AS1    | IL21R antisense RNA 1                                                               |
| ENSG00000101883 | 0.006319423 | 0.031940699 | 0.083729898 | RHOXF1       | Rhox homeobox family, member 1                                                      |
| ENSG00000182168 | 0.006331331 | 0.031988975 | 0.02542122  | UNC5C        | unc-5 netrin receptor C                                                             |
| ENSG00000134571 | 0.006338987 | 0.032019711 | 0.051894937 | MYBPC3       | myosin binding protein C, cardiac                                                   |
| ENSG00000233382 | 0.006364794 | 0.032126097 | 0.104708305 | NKAPP1       | NFKB activating protein pseudogene 1                                                |
| ENSG00000187527 | 0.006376902 | 0.032168821 | 0.007154221 | ATP13A5      | ATPase type 13A5                                                                    |
| ENSG00000095587 | 0.006377987 | 0.032168821 | 0.032002932 | TLL2         | tollid-like 2                                                                       |
| ENSG00000278848 | 0.006388239 | 0.032212548 | 0.102420703 | LOC102723655 | TP53-target gene 3 protein                                                          |
| ENSG00000133863 | 0.006458444 | 0.032482081 | 0.012123935 | TEX15        | testis expressed 15                                                                 |
| ENSG00000086991 | 0.006498237 | 0.032637871 | 0.009024291 | NOX4         | NADPH oxidase 4                                                                     |
| ENSG00000182901 | 0.006529685 | 0.032791777 | 0.067828842 | RG57         | regulator of G-protein signaling 7                                                  |
| ENSG00000170099 | 0.006551215 | 0.032883717 | 0.060913831 | SERPINA6     | serpin peptidase inhibitor, clade A (alpha-1 antiproteinase, antitrypsin), member 6 |
| ENSG00000133808 | 0.006599333 | 0.033100719 | 0.038878268 | MICALCL      | MICAL C-terminal like                                                               |
| ENSG00000203783 | 0.006614926 | 0.033158507 | 0.043765094 | PRR9         | proline rich 9                                                                      |
| ENSG00000112320 | 0.006660998 | 0.033352498 | 0.034924253 | SOBP         | sine oculis binding protein homolog                                                 |
| ENSG00000228836 | 0.006753404 | 0.033728087 | 0.015115412 | CT45A5       | cancer/testis antigen family 45, member A5                                          |
| ENSG00000132677 | 0.006775552 | 0.033826256 | 0.006692405 | RHBG         | Rh family, B glycoprotein (gene/pseudogene)                                         |
| ENSG00000172061 | 0.006803628 | 0.033949768 | 0.021153632 | LRRC15       | leucine rich repeat containing 15                                                   |
| ENSG00000156395 | 0.006818424 | 0.034015264 | 0.007892134 | SORCS3       | sortilin-related VPS10 domain containing receptor 3                                 |
| ENSG00000113805 | 0.006886495 | 0.034304414 | 0.007768123 | CNTN3        | contactin 3 (plasmacytoma associated)                                               |
| ENSG00000055118 | 0.006919206 | 0.034442083 | 0.035254901 | KCNH2        | potassium channel, voltage gated eag related subfamily H, member 2                  |
| ENSG00000119125 | 0.006929078 | 0.034482792 | 0.023972999 | GDA          | guanine deaminase                                                                   |
| ENSG00000135218 | 0.006969967 | 0.034652396 | 0.016923146 | CD36         | CD36 molecule (thrombospondin receptor)                                             |
| ENSG00000100629 | 0.007008335 | 0.034830391 | 0.048211712 | CEP128       | centrosomal protein 128kDa                                                          |
| ENSG00000251533 | 0.007038597 | 0.03495945  | 0.096597075 | LINC00605    | long intergenic non-protein coding RNA 605                                          |
| ENSG00000089169 | 0.007055463 | 0.035038947 | 0.006426881 | RPH3A        | rabphilin 3A                                                                        |
| ENSG00000155011 | 0.007061157 | 0.035054401 | 0.058372377 | DKK2         | dickkopf WNT signaling pathway inhibitor 2                                          |
| ENSG00000157856 | 0.007085922 | 0.035155913 | 0.030582127 | DRC1         | dynein regulatory complex subunit 1                                                 |
| ENSG00000176402 | 0.007110255 | 0.035272339 | 0.095603485 | GJC3         | gap junction protein, gamma 3, 30.2kDa                                              |
| ENSG00000182896 | 0.00712673  | 0.035330717 | 0.016205821 | TMEM95       | transmembrane protein 95                                                            |
| ENSG00000233154 | 0.007135573 | 0.035363469 | 0.024051241 | LOC101929023 | uncharacterized LOC101929023                                                        |

|                 |             |             |             |              |                                                                                                           |
|-----------------|-------------|-------------|-------------|--------------|-----------------------------------------------------------------------------------------------------------|
| ENSG00000112175 | 0.007172097 | 0.035497994 | 0.004869148 | BMP5         | bone morphogenetic protein 5                                                                              |
| ENSG00000143297 | 0.007220346 | 0.035667859 | 0.003095647 | FCRL5        | Fc receptor-like 5                                                                                        |
| ENSG00000128340 | 0.007223204 | 0.03567618  | 0.035185344 | RAC2         | ras-related C3 botulinum toxin substrate 2 (rho family, small GTP binding protein Rac2)                   |
| ENSG00000177932 | 0.007226816 | 0.035689692 | 0.114565969 | ZNF354C      | zinc finger protein 354C                                                                                  |
| ENSG00000164342 | 0.007255336 | 0.035808821 | 0.027486465 | TLR3         | toll-like receptor 3                                                                                      |
| ENSG00000249241 | 0.007265738 | 0.035851468 | 0.047678998 | LOC101060498 | uncharacterized LOC101060498                                                                              |
| ENSG00000177363 | 0.007294405 | 0.035971125 | 0.080584391 | LRRN4CL      | LRRN4 C-terminal like                                                                                     |
| ENSG00000165443 | 0.007322276 | 0.036082349 | 0.037196008 | PHYHIPL      | phytanoyl-CoA 2-hydroxylase interacting protein-like                                                      |
| ENSG00000172967 | 0.007368945 | 0.036255282 | 0.01525377  | XKR3         | XK, Kell blood group complex subunit-related family, member 3                                             |
| ENSG00000203989 | 0.007436626 | 0.036544113 | 0.004481367 | RHOXF2B      | Rhox homeobox family, member 2B                                                                           |
| ENSG00000158764 | 0.007446798 | 0.036585269 | 0.031142781 | ITLN2        | intelectin 2                                                                                              |
| ENSG00000258689 | 0.007456167 | 0.036622461 | 0.082857713 | LINC01269    | long intergenic non-protein coding RNA 1269                                                               |
| ENSG00000114646 | 0.007510007 | 0.036846907 | 0.097059566 | CSPG5        | chondroitin sulfate proteoglycan 5 (neuroglycan C)                                                        |
| ENSG00000109458 | 0.007511872 | 0.036851613 | 0.117656171 | GAB1         | GRB2-associated binding protein 1                                                                         |
| ENSG00000118017 | 0.007513738 | 0.036851891 | 0.014920886 | A4GNT        | alpha-1,4-N-acetylglucosaminyltransferase                                                                 |
| ENSG00000147231 | 0.007526587 | 0.036888249 | 0.022428303 | Cxorf57      | chromosome X open reading frame 57                                                                        |
| ENSG00000080166 | 0.00753166  | 0.036908671 | 0.005096757 | DCT          | dopachrome tautomerase                                                                                    |
| ENSG00000107831 | 0.007635227 | 0.037326352 | 0.060661302 | FGF8         | fibroblast growth factor 8 (androgen-induced)                                                             |
| ENSG00000112246 | 0.007656444 | 0.03740313  | 0.002834353 | SIM1         | single-minded family bHLH transcription factor 1                                                          |
| ENSG00000131831 | 0.007699998 | 0.037567969 | 0.06020866  | RAI2         | retinoic acid induced 2                                                                                   |
| ENSG00000253203 | 0.007707419 | 0.037589017 | 0.034125162 | GUSBP3       | glucuronidase, beta pseudogene 3                                                                          |
| ENSG00000250722 | 0.007709188 | 0.03759314  | 0.023617617 | SEPP1        | selenoprotein P, plasma, 1                                                                                |
| ENSG00000223382 | 0.007750557 | 0.037765771 | 0.02355955  | LOC105378622 | uncharacterized LOC105378622                                                                              |
| ENSG00000169885 | 0.007770314 | 0.037839406 | 0.153793497 | CALML6       | calmodulin-like 6                                                                                         |
| ENSG00000158869 | 0.007784887 | 0.037894204 | 0.135580852 | FCER1G       | Fc fragment of IgE, high affinity I, receptor for; gamma polypeptide                                      |
| ENSG00000128284 | 0.007823161 | 0.038052716 | 0.010823762 | APOL3        | apolipoprotein L, 3                                                                                       |
| ENSG00000135374 | 0.007823993 | 0.038052716 | 0.005109342 | ELF5         | E74-like factor 5 (ets domain transcription factor)                                                       |
| ENSG00000135363 | 0.007883244 | 0.038276881 | 0.074377977 | LMO2         | LIM domain only 2 (rhombotin-like 1)                                                                      |
| ENSG00000058335 | 0.007966371 | 0.038593063 | 0.011689197 | RASGRF1      | Ras protein-specific guanine nucleotide-releasing factor 1                                                |
| ENSG00000128253 | 0.007972957 | 0.038620376 | 0.125814131 | RFPL2        | ret finger protein-like 2                                                                                 |
| ENSG00000150051 | 0.00810252  | 0.039173404 | 0.02436659  | MKX          | mohawk homeobox                                                                                           |
| ENSG00000187730 | 0.008105026 | 0.039180867 | 0.12386551  | GABRD        | gamma-aminobutyric acid (GABA) A receptor, delta                                                          |
| ENSG00000178171 | 0.008131333 | 0.039280061 | 0.00519638  | AMER3        | APC membrane recruitment protein 3                                                                        |
| ENSG00000157368 | 0.008156443 | 0.039373332 | 0.038878239 | IL34         | interleukin 34                                                                                            |
| ENSG00000261186 | 0.008187014 | 0.039478784 | 0.122156028 | LOC102723927 | uncharacterized LOC102723927                                                                              |
| ENSG00000234380 | 0.008227032 | 0.039664858 | 0.042496407 | LINC01426    | long intergenic non-protein coding RNA 1426                                                               |
| ENSG00000177692 | 0.00822883  | 0.03966633  | 0.097778778 | DNAJC28      | DnaJ (Hsp40) homolog, subfamily C, member 28                                                              |
| ENSG00000204882 | 0.008239695 | 0.039709304 | 0.037879875 | GPR20        | G protein-coupled receptor 20                                                                             |
| ENSG00000124134 | 0.008245436 | 0.039722865 | 0.009645374 | KCNS1        | potassium voltage-gated channel, modifier subfamily S, member 1                                           |
| ENSG00000132693 | 0.008254216 | 0.039751055 | 0.006016411 | CRP          | C-reactive protein, pentraxin-related                                                                     |
| ENSG00000242759 | 0.008287079 | 0.039885729 | 0.012443042 | LINC00882    | long intergenic non-protein coding RNA 882                                                                |
| ENSG00000124568 | 0.00840979  | 0.04038564  | 0.036710986 | SLC17A1      | solute carrier family 17 (organic anion transporter), member 1                                            |
| ENSG00000143847 | 0.008418541 | 0.040413362 | 0.01539055  | PPFIA4       | protein tyrosine phosphatase, receptor type, f polypeptide (PTPRF), interacting protein (liprin), alpha 4 |
| ENSG00000122025 | 0.008440888 | 0.040501541 | 0.01479604  | FLT3         | fms-related tyrosine kinase 3                                                                             |
| ENSG00000163239 | 0.008442244 | 0.040501676 | 0.013445578 | TDRD10       | tudor domain containing 10                                                                                |
| ENSG00000144847 | 0.00850298  | 0.040741861 | 0.034618998 | IGSF11       | immunoglobulin superfamily, member 11                                                                     |
| ENSG00000198010 | 0.008516307 | 0.040796116 | 0.005393561 | DLGAP2       | discs, large (Drosophila) homolog-associated protein 2                                                    |
| ENSG00000256576 | 0.00851957  | 0.040806948 | 0.150127298 | LOC100996246 | uncharacterized LOC100996246                                                                              |
| ENSG00000142611 | 0.008642919 | 0.041310292 | 0.036593874 | PRDM16       | PR domain containing 16                                                                                   |
| ENSG00000171517 | 0.008726041 | 0.041639158 | 0.019914075 | LPAR3        | lysophosphatidic acid receptor 3                                                                          |
| ENSG00000188779 | 0.008739783 | 0.04169017  | 0.034896994 | SKOR1        | SKI family transcriptional corepressor 1                                                                  |
| ENSG00000181896 | 0.008742235 | 0.041692005 | 0.147110229 | ZNF101       | zinc finger protein 101                                                                                   |
| ENSG00000170516 | 0.008829634 | 0.042046993 | 0.035692519 | COX7B2       | cytochrome c oxidase subunit VIIb2                                                                        |
| ENSG00000087589 | 0.008833027 | 0.042051117 | 0.014690078 | CASS4        | Cas scaffolding protein family member 4                                                                   |
| ENSG00000151025 | 0.008866802 | 0.042187245 | 0.00722389  | GPR158       | G protein-coupled receptor 158                                                                            |
| ENSG00000187242 | 0.008953449 | 0.042539852 | 0.023591647 | KRT12        | keratin 12, type I                                                                                        |
| ENSG00000181995 | 0.008985587 | 0.042657703 | 0.005666298 | LINC00301    | long intergenic non-protein coding RNA 301                                                                |
| ENSG00000185052 | 0.009064183 | 0.042990728 | 0.023730625 | SLC24A3      | solute carrier family 24 (sodium/potassium/calcium exchanger), member 3                                   |
| ENSG00000135298 | 0.00906989  | 0.043012785 | 0.012658308 | ADGRB3       | adhesion G protein-coupled receptor B3                                                                    |
| ENSG00000225556 | 0.009089392 | 0.04309376  | 0.00897163  | C2CD4D       | C2 calcium-dependent domain containing 4D                                                                 |
| ENSG00000123700 | 0.009148843 | 0.043306509 | 0.056046965 | KCNJ2        | potassium channel, inwardly rectifying subfamily J, member 2                                              |
| ENSG00000248587 | 0.009154979 | 0.043330517 | 0.026579461 | GDNF-AS1     | GDNF antisense RNA 1 (head to head)                                                                       |
| ENSG00000160505 | 0.009159056 | 0.043344776 | 0.011426904 | NLRP4        | NLR family, pyrin domain containing 4                                                                     |
| ENSG00000132010 | 0.00920876  | 0.04354457  | 0.022034252 | ZNF20        | zinc finger protein 20                                                                                    |
| ENSG00000203697 | 0.009271848 | 0.043792033 | 0.011864738 | CAPN8        | calpain 8                                                                                                 |

|                 |             |             |             |              |                                                                       |
|-----------------|-------------|-------------|-------------|--------------|-----------------------------------------------------------------------|
| ENSG00000260220 | 0.009273978 | 0.043792852 | 0.01120183  | CCDC187      | coiled-coil domain containing 187                                     |
| ENSG00000145241 | 0.009334918 | 0.044028634 | 0.125123455 | CENPC        | centromere protein C                                                  |
| ENSG00000115423 | 0.00946382  | 0.044496883 | 0.018517602 | DNAH6        | dynein, axonemal, heavy chain 6                                       |
| ENSG00000023892 | 0.009504217 | 0.044630687 | 0.115278297 | DEF6         | DEF6 guanine nucleotide exchange factor                               |
| ENSG00000148680 | 0.009524861 | 0.044717317 | 0.061531339 | HTR7         | 5-hydroxytryptamine (serotonin) receptor 7, adenylate cyclase-coupled |
| ENSG00000169605 | 0.009529205 | 0.044727396 | 0.095615747 | GKN1         | gastrokine 1                                                          |
| ENSG00000145700 | 0.00953601  | 0.044749022 | 0.022621331 | ANKRD31      | ankyrin repeat domain 31                                              |
| ENSG00000158517 | 0.009588786 | 0.044960406 | 0.019893168 | NCF1         | neutrophil cytosolic factor 1                                         |
| ENSG00000234284 | 0.009599063 | 0.045003413 | 0.129857644 | ZNF879       | zinc finger protein 879                                               |
| ENSG00000182885 | 0.009632071 | 0.045137378 | 0.030795241 | ADGRG3       | adhesion G protein-coupled receptor G3                                |
| ENSG00000117643 | 0.009709764 | 0.045412606 | 0.032759734 | MAN1C1       | mannosidase, alpha, class 1C, member 1                                |
| ENSG00000148704 | 0.00989569  | 0.046165523 | 0.045622537 | VAX1         | ventral anterior homeobox 1                                           |
| ENSG00000123388 | 0.009904631 | 0.046196653 | 0.058461064 | HOXC11       | homeobox C11                                                          |
| ENSG00000226629 | 0.00993594  | 0.046326761 | 0.003228956 | LINC00974    | long intergenic non-protein coding RNA 974                            |
| ENSG00000271236 | 0.01001669  | 0.046623883 | 0.025530662 | SUMO2P15     | SUMO2 pseudogene 15                                                   |
| ENSG00000171049 | 0.010058788 | 0.04677635  | 0.008517486 | FPR2         | formyl peptide receptor 2                                             |
| ENSG00000196391 | 0.010100385 | 0.046932269 | 0.039987608 | ZNF774       | zinc finger protein 774                                               |
| ENSG00000196972 | 0.010121507 | 0.047014319 | 0.04149644  | SMIM10L2B    | small integral membrane protein 10 like 2B                            |
| ENSG00000110203 | 0.010140387 | 0.04707779  | 0.079673557 | FOLR3        | folate receptor 3 (gamma)                                             |
| ENSG00000228630 | 0.010281694 | 0.047655098 | 0.055996265 | HOTAIR       | HOX transcript antisense RNA                                          |
| ENSG00000198021 | 0.010324927 | 0.047833697 | 0.037986874 | SPANXA1      | sperm protein associated with the nucleus, X-linked, family member A1 |
| ENSG00000160111 | 0.010332896 | 0.047854282 | 0.007768186 | CPAMD8       | C3 and PZP-like, alpha-2-macroglobulin domain containing 8            |
| ENSG00000171791 | 0.010339166 | 0.047877875 | 0.018406794 | BCL2         | B-cell CLL/lymphoma 2                                                 |
| ENSG00000215018 | 0.01034923  | 0.047913583 | 0.017601472 | COL28A1      | collagen, type XXVIII, alpha 1                                        |
| ENSG00000233396 | 0.010351363 | 0.047918008 | 0.135394354 | LOC101928979 | uncharacterized LOC101928979                                          |
| ENSG00000135220 | 0.010359537 | 0.047944947 | 0.090089068 | UGT2A3       | UDP glucuronosyltransferase 2 family, polypeptide A3                  |
| ENSG00000165025 | 0.010390949 | 0.048057548 | 0.023035368 | SYK          | spleen tyrosine kinase                                                |
| ENSG00000156475 | 0.010401053 | 0.048087894 | 0.002725004 | PPP2R2B      | protein phosphatase 2, regulatory subunit B, beta                     |
| ENSG00000251620 | 0.010405917 | 0.048094    | 0.019091329 | STPG2-AS1    | STPG2 antisense RNA 1                                                 |
| ENSG00000163359 | 0.010445522 | 0.048259629 | 0.009367705 | COL6A3       | collagen, type VI, alpha 3                                            |
| ENSG00000186051 | 0.010459255 | 0.04829666  | 0.034956733 | TAL2         | T-cell acute lymphocytic leukemia 2                                   |
| ENSG00000118514 | 0.01052738  | 0.048556171 | 0.122173896 | ALDH8A1      | aldehyde dehydrogenase 8 family, member A1                            |
| ENSG00000138653 | 0.010576571 | 0.048749924 | 0.005314489 | NDST4        | N-deacetylase/N-sulfotransferase (heparan glucosaminyl) 4             |
| ENSG00000160963 | 0.010597    | 0.048821977 | 0.087587664 | COL26A1      | collagen, type XXVI, alpha 1                                          |
| ENSG00000226995 | 0.010607789 | 0.048855102 | 0.006788336 | LINC00658    | long intergenic non-protein coding RNA 658                            |
| ENSG00000168594 | 0.010645069 | 0.048995258 | 0.007906971 | ADAM29       | ADAM metalloproteinase domain 29                                      |
| ENSG00000164556 | 0.010652584 | 0.049017055 | 0.045579065 | FAM183BP     | acyloxyacyl hydrolase (neutrophil)                                    |
| ENSG00000189325 | 0.010693185 | 0.049137244 | 0.009067982 | C6orf222     | chromosome 6 open reading frame 222                                   |
| ENSG00000174473 | 0.010771549 | 0.04941926  | 0.022430632 | GALNTL6      | polypeptide N-acetylgalactosaminyltransferase-like 6                  |
| ENSG00000180767 | 0.010774026 | 0.049425054 | 0.148831329 | CHST13       | carbohydrate (chondroitin 4) sulfotransferase 13                      |
| ENSG00000188981 | 0.010871776 | 0.049822958 | 0.024588402 | MSANTD1      | Myb/SANT-like DNA-binding domain containing 1                         |



**Supplement Table 2. The number of genes in WGCNA sub-modules.**

| Gene Lv.                      | BLUE  |      |       |       | grey | TURQUOISE |     |           |        | total |
|-------------------------------|-------|------|-------|-------|------|-----------|-----|-----------|--------|-------|
| Module                        | black | blue | brown | green |      | pink      | red | turquoise | yellow |       |
| # of Genes ( $\beta = 0.9$ )  | 417   |      |       |       | 8    | 588       |     |           |        | 1013  |
| # of Genes ( $\beta = 0.25$ ) | 69    | 142  | 123   | 83    |      | 44        | 75  | 361       | 108    |       |

Supplement Table 3. DAVIDS results in WGCNA sub-modules.

| Group | Category      | Term                                                     | Count | %        | PValue   | Genes             | List Total | Pop Hits | Pop Total | d Enrichm | Bonferroni | Benjamini | FDR      |
|-------|---------------|----------------------------------------------------------|-------|----------|----------|-------------------|------------|----------|-----------|-----------|------------|-----------|----------|
| blue  | BBID          | 109.Chemokine_families                                   | 7     | 0.904393 | 3.14E-04 | ENSG00000006210,  | 17         | 25       | 358       | 5.896471  | 0.005638   | 0.005638  | 0.231253 |
| blue  | BIOCARTA      | h_eicosanoidPathway:Eicosanoid Metabolism                | 4     | 0.516796 | 0.013038 | ENSG00000160013,  | 36         | 21       | 1437      | 7.603175  | 0.645399   | 0.645399  | 12.99209 |
| blue  | BIOCARTA      | h_nuclearRsPathway:Nuclear Receptors in Lipid Metabolis  | 4     | 0.516796 | 0.054569 | ENSG00000186951,  | 36         | 36       | 1437      | 4.435185  | 0.988122   | 0.891014  | 44.84806 |
| blue  | COG_ONTOLOGY  | Secondary metabolites biosynthesis, transport, and catab | 11    | 1.421189 | 1.24E-05 | ENSG00000108242,  | 59         | 65       | 1950      | 5.59322   | 1.98E-04   | 1.98E-04  | 0.008786 |
| blue  | GOTERM_BP_FAT | GO:0007610~behavior                                      | 36    | 4.651163 | 2.13E-05 | ENSG00000204640,  | 475        | 469      | 13528     | 2.186098  | 0.050452   | 0.050452  | 0.037509 |
| blue  | GOTERM_BP_FAT | GO:0007626~locomotory behavior                           | 25    | 3.229974 | 3.65E-05 | ENSG00000204640,  | 475        | 274      | 13528     | 2.59854   | 0.08471    | 0.043292  | 0.064124 |
| blue  | GOTERM_BP_FAT | GO:0048598~embryonic morphogenesis                       | 26    | 3.359173 | 8.23E-05 | ENSG00000149256,  | 475        | 307      | 13528     | 2.411987  | 0.180929   | 0.064363  | 0.14453  |
| blue  | GOTERM_BP_FAT | GO:0030855~epithelial cell differentiation               | 16    | 2.067183 | 9.06E-05 | ENSG00000143556,  | 475        | 137      | 13528     | 3.326131  | 0.197408   | 0.053493  | 0.159237 |
| blue  | GOTERM_BP_FAT | GO:0006935~chemotaxis                                    | 17    | 2.196382 | 1.57E-04 | ENSG00000156234,  | 475        | 160      | 13528     | 3.026     | 0.316987   | 0.073414  | 0.275897 |
| blue  | GOTERM_BP_FAT | GO:0042330~taxis                                         | 17    | 2.196382 | 1.57E-04 | ENSG00000156234,  | 475        | 160      | 13528     | 3.026     | 0.316987   | 0.073414  | 0.275897 |
| blue  | GOTERM_BP_FAT | GO:0007218~neuropeptide signaling pathway                | 12    | 1.550388 | 3.97E-04 | ENSG00000197487,  | 475        | 93       | 13528     | 3.674839  | 0.618378   | 0.148328  | 0.695671 |
| blue  | GOTERM_BP_FAT | GO:0007267~cell-cell signaling                           | 38    | 4.909561 | 6.10E-04 | ENSG00000156234,  | 475        | 600      | 13528     | 1.803733  | 0.772642   | 0.190715  | 1.067677 |
| blue  | GOTERM_BP_FAT | GO:0001501~skeletal system development                   | 24    | 3.100775 | 8.86E-04 | ENSG00000009709,  | 475        | 319      | 13528     | 2.142696  | 0.883493   | 0.235647  | 1.545848 |
| blue  | GOTERM_BP_FAT | GO:0006952~defense response                              | 38    | 4.909561 | 9.43E-04 | ENSG00000164047,  | 475        | 615      | 13528     | 1.75974   | 0.898674   | 0.224602  | 1.645403 |
| blue  | GOTERM_BP_FAT | GO:0009611~response to wounding                          | 34    | 4.392765 | 9.73E-04 | ENSG00000135218,  | 475        | 530      | 13528     | 1.827019  | 0.905643   | 0.210272  | 1.696182 |
| blue  | GOTERM_BP_FAT | GO:0043583~ear development                               | 11    | 1.421189 | 0.001785 | ENSG00000152977,  | 475        | 95       | 13528     | 3.297684  | 0.986895   | 0.325691  | 3.092474 |
| blue  | GOTERM_BP_FAT | GO:0042471~ear morphogenesis                             | 9     | 1.162791 | 0.002067 | ENSG00000152977,  | 475        | 66       | 13528     | 3.883636  | 0.993388   | 0.341799  | 3.571773 |
| blue  | GOTERM_BP_FAT | GO:0048562~embryonic organ morphogenesis                 | 13    | 1.679587 | 0.002464 | ENSG00000152977,  | 475        | 133      | 13528     | 2.783759  | 0.997485   | 0.36898   | 4.244805 |
| blue  | GOTERM_BP_FAT | GO:0060429~epithelium development                        | 18    | 2.325581 | 0.002715 | ENSG00000143556,  | 475        | 227      | 13528     | 2.258326  | 0.998634   | 0.375712  | 4.667558 |
| blue  | GOTERM_BP_FAT | GO:0007423~sensory organ development                     | 18    | 2.325581 | 0.002976 | ENSG00000152977,  | 475        | 229      | 13528     | 2.238603  | 0.999276   | 0.382502  | 5.105359 |
| blue  | GOTERM_BP_FAT | GO:0030182~neuron differentiation                        | 28    | 3.617571 | 0.003241 | ENSG00000135333,  | 475        | 438      | 13528     | 1.820639  | 0.99962    | 0.388725  | 5.547296 |
| blue  | GOTERM_BP_FAT | GO:0030326~embryonic limb morphogenesis                  | 10    | 1.29199  | 0.003359 | ENSG00000106031,  | 475        | 87       | 13528     | 3.273563  | 0.999715   | 0.381356  | 5.744566 |
| blue  | GOTERM_BP_FAT | GO:0035113~embryonic appendage morphogenesis             | 10    | 1.29199  | 0.003359 | ENSG00000106031,  | 475        | 87       | 13528     | 3.273563  | 0.999715   | 0.381356  | 5.744566 |
| blue  | GOTERM_BP_FAT | GO:0045165~cell fate commitment                          | 13    | 1.679587 | 0.003548 | ENSG00000009709,  | 475        | 139      | 13528     | 2.663597  | 0.99982    | 0.38059   | 6.056846 |
| blue  | GOTERM_BP_FAT | GO:0007166~cell surface receptor linked signal transduct | 87    | 11.24031 | 0.00357  | ENSG00000135333,  | 475        | 1856     | 13528     | 1.335     | 0.999829   | 0.366603  | 6.094102 |
| blue  | GOTERM_BP_FAT | GO:0032101~regulation of response to external stimulus   | 14    | 1.808786 | 0.003931 | ENSG00000006210,  | 475        | 159      | 13528     | 2.507673  | 0.999929   | 0.379872  | 6.691097 |
| blue  | GOTERM_BP_FAT | GO:0007186~G-protein coupled receptor protein signalir   | 57    | 7.364341 | 0.004437 | ENSG000000054179, | 475        | 1123     | 13528     | 1.445557  | 0.999979   | 0.40176   | 7.52075  |
| blue  | GOTERM_BP_FAT | GO:0007586~digestion                                     | 10    | 1.29199  | 0.004542 | ENSG00000015520,  | 475        | 91       | 13528     | 3.12967   | 0.999984   | 0.394678  | 7.691403 |
| blue  | GOTERM_BP_FAT | GO:0006805~xenobiotic metabolic process                  | 5     | 0.645995 | 0.004613 | ENSG00000135226,  | 475        | 20       | 13528     | 7.12      | 0.999987   | 0.385948  | 7.806831 |
| blue  | GOTERM_BP_FAT | GO:0048608~reproductive structure development            | 12    | 1.550388 | 0.004724 | ENSG00000106031,  | 475        | 126      | 13528     | 2.712381  | 0.99999    | 0.380404  | 7.988358 |
| blue  | GOTERM_BP_FAT | GO:0006954~inflammatory response                         | 22    | 2.842377 | 0.005383 | ENSG00000143546,  | 475        | 325      | 13528     | 1.927877  | 0.999998   | 0.407706  | 9.052545 |
| blue  | GOTERM_BP_FAT | GO:0002064~epithelial cell development                   | 5     | 0.645995 | 0.005543 | ENSG00000119547,  | 475        | 21       | 13528     | 6.780952  | 0.999999   | 0.404659  | 9.309438 |
| blue  | GOTERM_BP_FAT | GO:0048858~cell projection morphogenesis                 | 18    | 2.325581 | 0.005877 | ENSG00000182636,  | 475        | 245      | 13528     | 2.092408  | 0.999999   | 0.411165  | 9.843692 |
| blue  | GOTERM_BP_FAT | GO:0007389~pattern specification process                 | 19    | 2.45478  | 0.006261 | ENSG00000009709,  | 475        | 267      | 13528     | 2.026667  | 1          | 0.419671  | 10.45384 |
| blue  | GOTERM_BP_FAT | GO:0006955~immune response                               | 38    | 4.909561 | 0.006454 | ENSG00000143556,  | 475        | 690      | 13528     | 1.568464  | 1          | 0.418197  | 10.7587  |
| blue  | GOTERM_BP_FAT | GO:0008585~female gonad development                      | 8     | 1.033592 | 0.006874 | ENSG00000204837,  | 475        | 64       | 13528     | 3.56      | 1          | 0.427526  | 11.42012 |
| blue  | GOTERM_BP_FAT | GO:0000902~cell morphogenesis                            | 23    | 2.971576 | 0.007389 | ENSG00000182636,  | 475        | 356      | 13528     | 1.84      | 1          | 0.44032   | 12.22428 |
| blue  | GOTERM_BP_FAT | GO:0048568~embryonic organ development                   | 14    | 1.808786 | 0.007554 | ENSG00000152977,  | 475        | 172      | 13528     | 2.31814   | 1          | 0.437235  | 12.48118 |
| blue  | GOTERM_BP_FAT | GO:0009410~response to xenobiotic stimulus               | 5     | 0.645995 | 0.00776  | ENSG00000135226,  | 475        | 23       | 13528     | 6.191304  | 1          | 0.436013  | 12.79984 |
| blue  | GOTERM_BP_FAT | GO:0002088~lens development in camera-type eye           | 5     | 0.645995 | 0.00776  | ENSG00000146950,  | 475        | 23       | 13528     | 6.191304  | 1          | 0.436013  | 12.79984 |
| blue  | GOTERM_BP_FAT | GO:0035107~appendage morphogenesis                       | 10    | 1.29199  | 0.007858 | ENSG00000106031,  | 475        | 99       | 13528     | 2.876768  | 1          | 0.430442  | 12.95042 |
| blue  | GOTERM_BP_FAT | GO:0035108~limb morphogenesis                            | 10    | 1.29199  | 0.007858 | ENSG00000106031,  | 475        | 99       | 13528     | 2.876768  | 1          | 0.430442  | 12.95042 |
| blue  | GOTERM_BP_FAT | GO:0007409~axonogenesis                                  | 15    | 1.937984 | 0.008081 | ENSG00000182636,  | 475        | 193      | 13528     | 2.213472  | 1          | 0.430163  | 13.29404 |
| blue  | GOTERM_BP_FAT | GO:0048812~neuron projection morphogenesis               | 16    | 2.067183 | 0.00822  | ENSG00000182636,  | 475        | 213      | 13528     | 2.139343  | 1          | 0.42663   | 13.50733 |
| blue  | GOTERM_BP_FAT | GO:0048666~neuron development                            | 22    | 2.842377 | 0.008394 | ENSG00000182636,  | 475        | 339      | 13528     | 1.84826   | 1          | 0.424619  | 13.77436 |
| blue  | GOTERM_BP_FAT | GO:0019932~second-messenger-mediated signaling           | 17    | 2.196382 | 0.008822 | ENSG00000135218,  | 475        | 235      | 13528     | 2.060255  | 1          | 0.432034  | 14.42527 |

|      |               |                                                           |    |          |          |                  |     |     |       |          |   |          |          |
|------|---------------|-----------------------------------------------------------|----|----------|----------|------------------|-----|-----|-------|----------|---|----------|----------|
| blue | GOTERM_BP_FAT | GO:0032990~cell part morphogenesis                        | 18 | 2.325581 | 0.00897  | ENSG00000182636, | 475 | 256 | 13528 | 2.0025   | 1 | 0.429062 | 14.64954 |
| blue | GOTERM_BP_FAT | GO:0031175~neuron projection development                  | 18 | 2.325581 | 0.00897  | ENSG00000182636, | 475 | 256 | 13528 | 2.0025   | 1 | 0.429062 | 14.64954 |
| blue | GOTERM_BP_FAT | GO:0006875~cellular metal ion homeostasis                 | 15 | 1.937984 | 0.009196 | ENSG00000185052, | 475 | 196 | 13528 | 2.179592 | 1 | 0.428979 | 14.99194 |
| blue | GOTERM_BP_FAT | GO:0050953~sensory perception of light stimulus           | 16 | 2.067183 | 0.009292 | ENSG00000101850, | 475 | 216 | 13528 | 2.10963  | 1 | 0.424425 | 15.13635 |
| blue | GOTERM_BP_FAT | GO:0007601~visual perception                              | 16 | 2.067183 | 0.009292 | ENSG00000101850, | 475 | 216 | 13528 | 2.10963  | 1 | 0.424425 | 15.13635 |
| blue | GOTERM_BP_FAT | GO:0042474~middle ear morphogenesis                       | 4  | 0.516796 | 0.009404 | ENSG00000183691, | 475 | 13  | 13528 | 8.763077 | 1 | 0.420611 | 15.30529 |
| blue | GOTERM_BP_FAT | GO:0031328~positive regulation of cellular biosynthetic p | 37 | 4.780362 | 0.009953 | ENSG00000012504, | 475 | 685 | 13528 | 1.538336 | 1 | 0.431256 | 16.12568 |
| blue | GOTERM_BP_FAT | GO:0060173~limb development                               | 10 | 1.29199  | 0.010086 | ENSG00000106031, | 475 | 103 | 13528 | 2.765049 | 1 | 0.428194 | 16.32485 |
| blue | GOTERM_BP_FAT | GO:0048736~appendage development                          | 10 | 1.29199  | 0.010086 | ENSG00000106031, | 475 | 103 | 13528 | 2.765049 | 1 | 0.428194 | 16.32485 |
| blue | GOTERM_BP_FAT | GO:0046660~female sex differentiation                     | 8  | 1.033592 | 0.010289 | ENSG00000204837, | 475 | 69  | 13528 | 3.302029 | 1 | 0.427401 | 16.62546 |
| blue | GOTERM_BP_FAT | GO:0046545~development of primary female sexual char      | 8  | 1.033592 | 0.010289 | ENSG00000204837, | 475 | 69  | 13528 | 3.302029 | 1 | 0.427401 | 16.62546 |
| blue | GOTERM_BP_FAT | GO:0030030~cell projection organization                   | 23 | 2.971576 | 0.010706 | ENSG00000182636, | 475 | 368 | 13528 | 1.78     | 1 | 0.433159 | 17.24094 |
| blue | GOTERM_BP_FAT | GO:0007369~gastrulation                                   | 8  | 1.033592 | 0.011098 | ENSG00000149256, | 475 | 70  | 13528 | 3.254857 | 1 | 0.437887 | 17.81549 |
| blue | GOTERM_BP_FAT | GO:0045088~regulation of innate immune response           | 7  | 0.904393 | 0.011162 | ENSG00000171855, | 475 | 54  | 13528 | 3.691852 | 1 | 0.432963 | 17.9092  |
| blue | GOTERM_BP_FAT | GO:0009891~positive regulation of biosynthetic process    | 37 | 4.780362 | 0.012224 | ENSG00000012504, | 475 | 695 | 13528 | 1.516201 | 1 | 0.456081 | 19.44545 |
| blue | GOTERM_BP_FAT | GO:0000904~cell morphogenesis involved in differentiati   | 17 | 2.196382 | 0.012364 | ENSG00000182636, | 475 | 244 | 13528 | 1.984262 | 1 | 0.453187 | 19.6458  |
| blue | GOTERM_BP_FAT | GO:0055065~metal ion homeostasis                          | 15 | 1.937984 | 0.013278 | ENSG00000185052, | 475 | 205 | 13528 | 2.083902 | 1 | 0.470525 | 20.94365 |
| blue | GOTERM_BP_FAT | GO:0045137~development of primary sexual characterist     | 11 | 1.421189 | 0.013789 | ENSG00000106031, | 475 | 127 | 13528 | 2.466772 | 1 | 0.476801 | 21.65987 |
| blue | GOTERM_BP_FAT | GO:0010648~negative regulation of cell communication      | 17 | 2.196382 | 0.014251 | ENSG00000168918, | 475 | 248 | 13528 | 1.952258 | 1 | 0.481613 | 22.30301 |
| blue | GOTERM_BP_FAT | GO:0050900~leukocyte migration                            | 7  | 0.904393 | 0.014372 | ENSG00000006210, | 475 | 57  | 13528 | 3.497544 | 1 | 0.478141 | 22.46983 |
| blue | GOTERM_BP_FAT | GO:0048511~rhythmic process                               | 11 | 1.421189 | 0.014507 | ENSG00000204640, | 475 | 128 | 13528 | 2.4475   | 1 | 0.475116 | 22.65639 |
| blue | GOTERM_BP_FAT | GO:0048667~cell morphogenesis involved in neuron diff     | 15 | 1.937984 | 0.015702 | ENSG00000182636, | 475 | 209 | 13528 | 2.044019 | 1 | 0.496217 | 24.28808 |
| blue | GOTERM_BP_FAT | GO:0019935~cyclic-nucleotide-mediated signaling           | 11 | 1.421189 | 0.016026 | ENSG00000135218, | 475 | 130 | 13528 | 2.409846 | 1 | 0.497227 | 24.72575 |
| blue | GOTERM_BP_FAT | GO:0007168~receptor guanylyl cyclase signaling pathway    | 3  | 0.387597 | 0.016733 | ENSG00000172367, | 475 | 6   | 13528 | 14.24    | 1 | 0.506308 | 25.67157 |
| blue | GOTERM_BP_FAT | GO:0008406~gonad development                              | 10 | 1.29199  | 0.016805 | ENSG00000204837, | 475 | 112 | 13528 | 2.542857 | 1 | 0.501856 | 25.76638 |
| blue | GOTERM_BP_FAT | GO:0050727~regulation of inflammatory response            | 8  | 1.033592 | 0.016946 | ENSG00000006210, | 475 | 76  | 13528 | 2.997895 | 1 | 0.498945 | 25.95298 |
| blue | GOTERM_BP_FAT | GO:0007548~sex differentiation                            | 12 | 1.550388 | 0.017239 | ENSG00000106031, | 475 | 151 | 13528 | 2.263311 | 1 | 0.499211 | 26.34012 |
| blue | GOTERM_BP_FAT | GO:0015758~glucose transport                              | 5  | 0.645995 | 0.017654 | ENSG00000100170, | 475 | 29  | 13528 | 4.910345 | 1 | 0.501896 | 26.88517 |
| blue | GOTERM_BP_FAT | GO:0040012~regulation of locomotion                       | 14 | 1.808786 | 0.017769 | ENSG00000168539, | 475 | 192 | 13528 | 2.076667 | 1 | 0.498628 | 27.03602 |
| blue | GOTERM_BP_FAT | GO:0009953~dorsal/ventral pattern formation               | 7  | 0.904393 | 0.018174 | ENSG00000009709, | 475 | 60  | 13528 | 3.322667 | 1 | 0.501042 | 27.5625  |
| blue | GOTERM_BP_FAT | GO:0016042~lipid catabolic process                        | 13 | 1.679587 | 0.018776 | ENSG00000204140, | 475 | 173 | 13528 | 2.140116 | 1 | 0.507101 | 28.34017 |
| blue | GOTERM_BP_FAT | GO:0008643~carbohydrate transport                         | 7  | 0.904393 | 0.01958  | ENSG00000100170, | 475 | 61  | 13528 | 3.268197 | 1 | 0.516579 | 29.36558 |
| blue | GOTERM_BP_FAT | GO:0008645~hexose transport                               | 5  | 0.645995 | 0.019821 | ENSG00000100170, | 475 | 30  | 13528 | 4.746667 | 1 | 0.515625 | 29.66941 |
| blue | GOTERM_BP_FAT | GO:0045596~negative regulation of cell differentiation    | 15 | 1.937984 | 0.020314 | ENSG00000135144, | 475 | 216 | 13528 | 1.977778 | 1 | 0.519153 | 30.28948 |
| blue | GOTERM_BP_FAT | GO:0048732~gland development                              | 11 | 1.421189 | 0.020337 | ENSG00000101144, | 475 | 135 | 13528 | 2.320593 | 1 | 0.514422 | 30.31804 |
| blue | GOTERM_BP_FAT | GO:0015749~monosaccharide transport                       | 5  | 0.645995 | 0.022145 | ENSG00000100170, | 475 | 31  | 13528 | 4.593548 | 1 | 0.539801 | 32.54403 |
| blue | GOTERM_BP_FAT | GO:0032989~cellular component morphogenesis               | 23 | 2.971576 | 0.023292 | ENSG00000182636, | 475 | 397 | 13528 | 1.649975 | 1 | 0.553033 | 33.92173 |
| blue | GOTERM_BP_FAT | GO:0048585~negative regulation of response to stimulus    | 9  | 1.162791 | 0.02404  | ENSG00000168918, | 475 | 100 | 13528 | 2.5632   | 1 | 0.559536 | 34.80666 |
| blue | GOTERM_BP_FAT | GO:0009968~negative regulation of signal transduction     | 15 | 1.937984 | 0.024187 | ENSG00000168918, | 475 | 221 | 13528 | 1.933032 | 1 | 0.556783 | 34.97889 |
| blue | GOTERM_BP_FAT | GO:0055082~cellular chemical homeostasis                  | 22 | 2.842377 | 0.027282 | ENSG00000185052, | 475 | 380 | 13528 | 1.648842 | 1 | 0.596201 | 38.51054 |
| blue | GOTERM_BP_FAT | GO:0010907~positive regulation of glucose metabolic pr    | 4  | 0.516796 | 0.027283 | ENSG00000109819, | 475 | 19  | 13528 | 5.995789 | 1 | 0.591298 | 38.51126 |
| blue | GOTERM_BP_FAT | GO:0032102~negative regulation of response to external    | 6  | 0.775194 | 0.030052 | ENSG00000136250, | 475 | 50  | 13528 | 3.4176   | 1 | 0.622435 | 41.51764 |
| blue | GOTERM_BP_FAT | GO:0003013~circulatory system process                     | 13 | 1.679587 | 0.030836 | ENSG00000135744, | 475 | 186 | 13528 | 1.990538 | 1 | 0.627245 | 42.34292 |
| blue | GOTERM_BP_FAT | GO:0008015~blood circulation                              | 13 | 1.679587 | 0.030836 | ENSG00000135744, | 475 | 186 | 13528 | 1.990538 | 1 | 0.627245 | 42.34292 |
| blue | GOTERM_BP_FAT | GO:0045913~positive regulation of carbohydrate metabo     | 4  | 0.516796 | 0.031283 | ENSG00000109819, | 475 | 20  | 13528 | 5.696    | 1 | 0.627879 | 42.80886 |
| blue | GOTERM_BP_FAT | GO:0010676~positive regulation of cellular carbohydrate   | 4  | 0.516796 | 0.031283 | ENSG00000109819, | 475 | 20  | 13528 | 5.696    | 1 | 0.627879 | 42.80886 |
| blue | GOTERM_BP_FAT | GO:0042036~negative regulation of cytokine biosynthetic   | 4  | 0.516796 | 0.031283 | ENSG00000168918, | 475 | 20  | 13528 | 5.696    | 1 | 0.627879 | 42.80886 |
| blue | GOTERM_BP_FAT | GO:0042417~dopamine metabolic process                     | 4  | 0.516796 | 0.031283 | ENSG00000169418, | 475 | 20  | 13528 | 5.696    | 1 | 0.627879 | 42.80886 |

|      |               |                                                                   |    |          |          |                  |     |     |       |          |   |          |          |
|------|---------------|-------------------------------------------------------------------|----|----------|----------|------------------|-----|-----|-------|----------|---|----------|----------|
| blue | GOTERM_BP_FAT | GO:0050778~positive regulation of immune response                 | 11 | 1.421189 | 0.031403 | ENSG00000171855, | 475 | 145 | 13528 | 2.160552 | 1 | 0.624617 | 42.93267 |
| blue | GOTERM_BP_FAT | GO:0001708~cell fate specification                                | 6  | 0.775194 | 0.032396 | ENSG00000103449, | 475 | 51  | 13528 | 3.350588 | 1 | 0.631627 | 43.95228 |
| blue | GOTERM_BP_FAT | GO:0048592~eye morphogenesis                                      | 7  | 0.904393 | 0.033554 | ENSG00000101144, | 475 | 69  | 13528 | 2.889275 | 1 | 0.640203 | 45.12052 |
| blue | GOTERM_BP_FAT | GO:0043010~camera-type eye development                            | 9  | 1.162791 | 0.034187 | ENSG00000101144, | 475 | 107 | 13528 | 2.395514 | 1 | 0.642685 | 45.74919 |
| blue | GOTERM_BP_FAT | GO:0010557~positive regulation of macromolecule biosynthesis      | 33 | 4.263566 | 0.035418 | ENSG00000012504, | 475 | 654 | 13528 | 1.437064 | 1 | 0.651463 | 46.95193 |
| blue | GOTERM_BP_FAT | GO:0045923~positive regulation of fatty acid metabolic process    | 4  | 0.516796 | 0.035573 | ENSG00000186951, | 475 | 21  | 13528 | 5.424762 | 1 | 0.6487   | 47.10191 |
| blue | GOTERM_BP_FAT | GO:0021532~neural tube patterning                                 | 4  | 0.516796 | 0.035573 | ENSG00000009709, | 475 | 21  | 13528 | 5.424762 | 1 | 0.6487   | 47.10191 |
| blue | GOTERM_BP_FAT | GO:0007223~Wnt receptor signaling pathway, calcium mobilization   | 4  | 0.516796 | 0.035573 | ENSG00000169071, | 475 | 21  | 13528 | 5.424762 | 1 | 0.6487   | 47.10191 |
| blue | GOTERM_BP_FAT | GO:0046903~secretion                                              | 18 | 2.325581 | 0.036092 | ENSG00000165269, | 475 | 300 | 13528 | 1.7088   | 1 | 0.649767 | 47.59966 |
| blue | GOTERM_BP_FAT | GO:0032956~regulation of actin cytoskeleton organization          | 8  | 1.033592 | 0.036441 | ENSG00000146950, | 475 | 89  | 13528 | 2.56     | 1 | 0.649067 | 47.93181 |
| blue | GOTERM_BP_FAT | GO:0030335~positive regulation of cell migration                  | 8  | 1.033592 | 0.036441 | ENSG00000119547, | 475 | 89  | 13528 | 2.56     | 1 | 0.649067 | 47.93181 |
| blue | GOTERM_BP_FAT | GO:0048878~chemical homeostasis                                   | 27 | 3.488372 | 0.037335 | ENSG00000156234, | 475 | 512 | 13528 | 1.501875 | 1 | 0.653896 | 48.77495 |
| blue | GOTERM_BP_FAT | GO:0019934~cGMP-mediated signaling                                | 3  | 0.387597 | 0.037462 | ENSG00000135218, | 475 | 9   | 13528 | 9.493333 | 1 | 0.650968 | 48.8935  |
| blue | GOTERM_BP_FAT | GO:0045671~negative regulation of osteoclast differentiation      | 3  | 0.387597 | 0.037462 | ENSG00000168918, | 475 | 9   | 13528 | 9.493333 | 1 | 0.650968 | 48.8935  |
| blue | GOTERM_BP_FAT | GO:0044003~modification by symbiont of host morphology            | 3  | 0.387597 | 0.037462 | ENSG00000164342, | 475 | 9   | 13528 | 9.493333 | 1 | 0.650968 | 48.8935  |
| blue | GOTERM_BP_FAT | GO:0009617~response to bacterium                                  | 13 | 1.679587 | 0.039259 | ENSG00000171855, | 475 | 193 | 13528 | 1.918342 | 1 | 0.664361 | 50.54569 |
| blue | GOTERM_BP_FAT | GO:0030802~regulation of cyclic nucleotide biosynthetic process   | 9  | 1.162791 | 0.039311 | ENSG00000100312, | 475 | 110 | 13528 | 2.330182 | 1 | 0.660761 | 50.59285 |
| blue | GOTERM_BP_FAT | GO:0030808~regulation of nucleotide biosynthetic process          | 9  | 1.162791 | 0.039311 | ENSG00000100312, | 475 | 110 | 13528 | 2.330182 | 1 | 0.660761 | 50.59285 |
| blue | GOTERM_BP_FAT | GO:0030595~leukocyte chemotaxis                                   | 5  | 0.645995 | 0.039495 | ENSG00000006210, | 475 | 37  | 13528 | 3.848649 | 1 | 0.658449 | 50.75829 |
| blue | GOTERM_BP_FAT | GO:0042127~regulation of cell proliferation                       | 38 | 4.909561 | 0.041095 | ENSG00000128340, | 475 | 787 | 13528 | 1.375146 | 1 | 0.669301 | 52.18076 |
| blue | GOTERM_BP_FAT | GO:0032970~regulation of actin filament-based process             | 8  | 1.033592 | 0.042442 | ENSG00000146950, | 475 | 92  | 13528 | 2.476522 | 1 | 0.677393 | 53.34806 |
| blue | GOTERM_BP_FAT | GO:0031349~positive regulation of defense response                | 7  | 0.904393 | 0.042477 | ENSG00000171855, | 475 | 73  | 13528 | 2.730959 | 1 | 0.673795 | 53.37813 |
| blue | GOTERM_BP_FAT | GO:0001654~eye development                                        | 10 | 1.29199  | 0.042483 | ENSG00000101144, | 475 | 132 | 13528 | 2.157576 | 1 | 0.669978 | 53.38319 |
| blue | GOTERM_BP_FAT | GO:0003006~reproductive developmental process                     | 16 | 2.067183 | 0.043603 | ENSG00000169071, | 475 | 262 | 13528 | 1.739237 | 1 | 0.67588  | 54.33309 |
| blue | GOTERM_BP_FAT | GO:0003002~regionalization                                        | 13 | 1.679587 | 0.044739 | ENSG00000009709, | 475 | 197 | 13528 | 1.879391 | 1 | 0.681695 | 55.27722 |
| blue | GOTERM_BP_FAT | GO:0042035~regulation of cytokine biosynthetic process            | 7  | 0.904393 | 0.044919 | ENSG00000197272, | 475 | 74  | 13528 | 2.694054 | 1 | 0.679453 | 55.42506 |
| blue | GOTERM_BP_FAT | GO:0007498~mesoderm development                                   | 7  | 0.904393 | 0.044919 | ENSG00000101144, | 475 | 74  | 13528 | 2.694054 | 1 | 0.679453 | 55.42506 |
| blue | GOTERM_BP_FAT | GO:0051216~cartilage development                                  | 7  | 0.904393 | 0.044919 | ENSG00000054938, | 475 | 74  | 13528 | 2.694054 | 1 | 0.679453 | 55.42506 |
| blue | GOTERM_BP_FAT | GO:0030799~regulation of cyclic nucleotide metabolic process      | 9  | 1.162791 | 0.044925 | ENSG00000100312, | 475 | 113 | 13528 | 2.268319 | 1 | 0.675795 | 55.4297  |
| blue | GOTERM_BP_FAT | GO:0017156~calcium ion-dependent exocytosis                       | 4  | 0.516796 | 0.045008 | ENSG00000100312, | 475 | 23  | 13528 | 4.953043 | 1 | 0.672817 | 55.49809 |
| blue | GOTERM_BP_FAT | GO:0014821~phasic smooth muscle contraction                       | 3  | 0.387597 | 0.04576  | ENSG00000135744, | 475 | 10  | 13528 | 8.544    | 1 | 0.67538  | 56.11031 |
| blue | GOTERM_BP_FAT | GO:0060134~prepulse inhibition                                    | 3  | 0.387597 | 0.04576  | ENSG00000198785, | 475 | 10  | 13528 | 8.544    | 1 | 0.67538  | 56.11031 |
| blue | GOTERM_BP_FAT | GO:0050829~defense response to Gram-negative bacterium            | 3  | 0.387597 | 0.04576  | ENSG00000143556, | 475 | 10  | 13528 | 8.544    | 1 | 0.67538  | 56.11031 |
| blue | GOTERM_BP_FAT | GO:0045123~cellular extravasation                                 | 3  | 0.387597 | 0.04576  | ENSG00000006210, | 475 | 10  | 13528 | 8.544    | 1 | 0.67538  | 56.11031 |
| blue | GOTERM_BP_FAT | GO:0042472~inner ear morphogenesis                                | 6  | 0.775194 | 0.045794 | ENSG00000152977, | 475 | 56  | 13528 | 3.051429 | 1 | 0.672052 | 56.13728 |
| blue | GOTERM_BP_FAT | GO:0001775~cell activation                                        | 17 | 2.196382 | 0.046452 | ENSG00000054179, | 475 | 287 | 13528 | 1.686969 | 1 | 0.673829 | 56.66634 |
| blue | GOTERM_BP_FAT | GO:0060326~cell chemotaxis                                        | 5  | 0.645995 | 0.046601 | ENSG00000006210, | 475 | 39  | 13528 | 3.651282 | 1 | 0.671495 | 56.78508 |
| blue | GOTERM_BP_FAT | GO:0033555~multicellular organismal response to stress            | 5  | 0.645995 | 0.046601 | ENSG00000164418, | 475 | 39  | 13528 | 3.651282 | 1 | 0.671495 | 56.78508 |
| blue | GOTERM_BP_FAT | GO:0006109~regulation of carbohydrate metabolic process           | 5  | 0.645995 | 0.046601 | ENSG00000012504, | 475 | 39  | 13528 | 3.651282 | 1 | 0.671495 | 56.78508 |
| blue | GOTERM_BP_FAT | GO:0045321~leukocyte activation                                   | 15 | 1.937984 | 0.046654 | ENSG00000164342, | 475 | 242 | 13528 | 1.765289 | 1 | 0.668417 | 56.8271  |
| blue | GOTERM_BP_FAT | GO:0010565~regulation of cellular ketone metabolic process        | 6  | 0.775194 | 0.048815 | ENSG00000186951, | 475 | 57  | 13528 | 2.997895 | 1 | 0.681907 | 58.51591 |
| blue | GOTERM_BP_FAT | GO:0001503~ossification                                           | 9  | 1.162791 | 0.048946 | ENSG00000152580, | 475 | 115 | 13528 | 2.22887  | 1 | 0.679482 | 58.61588 |
| blue | GOTERM_BP_FAT | GO:0051240~positive regulation of multicellular organismal growth | 15 | 1.937984 | 0.049381 | ENSG00000137752, | 475 | 244 | 13528 | 1.75082  | 1 | 0.6794   | 58.94748 |
| blue | GOTERM_BP_FAT | GO:0001704~formation of primary germ layer                        | 5  | 0.645995 | 0.050403 | ENSG00000101144, | 475 | 40  | 13528 | 3.56     | 1 | 0.683703 | 59.71673 |
| blue | GOTERM_BP_FAT | GO:0006140~regulation of nucleotide metabolic process             | 9  | 1.162791 | 0.051041 | ENSG00000100312, | 475 | 116 | 13528 | 2.209655 | 1 | 0.685077 | 60.18984 |
| blue | GOTERM_BP_FAT | GO:0008285~negative regulation of cell proliferation              | 20 | 2.583979 | 0.052024 | ENSG00000182636, | 475 | 361 | 13528 | 1.577839 | 1 | 0.68891  | 60.90877 |
| blue | GOTERM_BP_FAT | GO:0048729~tissue morphogenesis                                   | 12 | 1.550388 | 0.052144 | ENSG00000101144, | 475 | 180 | 13528 | 1.898667 | 1 | 0.68651  | 60.99559 |
| blue | GOTERM_BP_FAT | GO:0048706~embryonic skeletal system development                  | 7  | 0.904393 | 0.052763 | ENSG00000009709, | 475 | 77  | 13528 | 2.589091 | 1 | 0.687685 | 61.44088 |

|      |               |                                                         |    |          |          |                  |     |     |       |          |   |          |          |
|------|---------------|---------------------------------------------------------|----|----------|----------|------------------|-----|-----|-------|----------|---|----------|----------|
| blue | GOTERM_BP_FAT | GO:0008016~regulation of heart contraction              | 7  | 0.904393 | 0.052763 | ENSG00000178342, | 475 | 77  | 13528 | 2.589091 | 1 | 0.687685 | 61.44088 |
| blue | GOTERM_BP_FAT | GO:0006182~cGMP biosynthetic process                    | 3  | 0.387597 | 0.054659 | ENSG00000169418, | 475 | 11  | 13528 | 7.767273 | 1 | 0.697654 | 62.77574 |
| blue | GOTERM_BP_FAT | GO:0002089~lens morphogenesis in camera-type eye        | 3  | 0.387597 | 0.054659 | ENSG00000146950, | 475 | 11  | 13528 | 7.767273 | 1 | 0.697654 | 62.77574 |
| blue | GOTERM_BP_FAT | GO:0051272~positive regulation of cell motion           | 8  | 1.033592 | 0.056275 | ENSG00000119547, | 475 | 98  | 13528 | 2.324898 | 1 | 0.705323 | 63.87875 |
| blue | GOTERM_BP_FAT | GO:0040017~positive regulation of locomotion            | 8  | 1.033592 | 0.056275 | ENSG00000119547, | 475 | 98  | 13528 | 2.324898 | 1 | 0.705323 | 63.87875 |
| blue | GOTERM_BP_FAT | GO:0006874~cellular calcium ion homeostasis             | 12 | 1.550388 | 0.057394 | ENSG00000143184, | 475 | 183 | 13528 | 1.867541 | 1 | 0.709499 | 64.62418 |
| blue | GOTERM_BP_FAT | GO:0030003~cellular cation homeostasis                  | 15 | 1.937984 | 0.063867 | ENSG00000185052, | 475 | 254 | 13528 | 1.68189  | 1 | 0.745503 | 68.66046 |
| blue | GOTERM_BP_FAT | GO:0010259~multicellular organismal aging               | 3  | 0.387597 | 0.064106 | ENSG00000168918, | 475 | 12  | 13528 | 7.12     | 1 | 0.743882 | 68.80084 |
| blue | GOTERM_BP_FAT | GO:0050905~neuromuscular process                        | 6  | 0.775194 | 0.065646 | ENSG00000174498, | 475 | 62  | 13528 | 2.756129 | 1 | 0.749485 | 69.69093 |
| blue | GOTERM_BP_FAT | GO:0022602~ovulation cycle process                      | 6  | 0.775194 | 0.065646 | ENSG00000204837, | 475 | 62  | 13528 | 2.756129 | 1 | 0.749485 | 69.69093 |
| blue | GOTERM_BP_FAT | GO:0055074~calcium ion homeostasis                      | 12 | 1.550388 | 0.066901 | ENSG00000143184, | 475 | 188 | 13528 | 1.817872 | 1 | 0.753372 | 70.39878 |
| blue | GOTERM_BP_FAT | GO:0006575~cellular amino acid derivative metabolic pro | 11 | 1.421189 | 0.06711  | ENSG00000169418, | 475 | 166 | 13528 | 1.887229 | 1 | 0.751624 | 70.51553 |
| blue | GOTERM_BP_FAT | GO:0048593~camera-type eye morphogenesis                | 5  | 0.645995 | 0.06725  | ENSG00000101144, | 475 | 44  | 13528 | 3.236364 | 1 | 0.749519 | 70.59298 |
| blue | GOTERM_BP_FAT | GO:0001656~metanephros development                      | 5  | 0.645995 | 0.06725  | ENSG00000100170, | 475 | 44  | 13528 | 3.236364 | 1 | 0.749519 | 70.59298 |
| blue | GOTERM_BP_FAT | GO:0060348~bone development                             | 9  | 1.162791 | 0.067323 | ENSG00000152580, | 475 | 123 | 13528 | 2.083902 | 1 | 0.747073 | 70.63327 |
| blue | GOTERM_BP_FAT | GO:0043482~cellular pigment accumulation                | 2  | 0.258398 | 0.068852 | ENSG00000146950, | 475 | 2   | 13528 | 28.48    | 1 | 0.752332 | 71.46826 |
| blue | GOTERM_BP_FAT | GO:0001869~negative regulation of complement activati   | 2  | 0.258398 | 0.068852 | ENSG00000175899, | 475 | 2   | 13528 | 28.48    | 1 | 0.752332 | 71.46826 |
| blue | GOTERM_BP_FAT | GO:0001868~regulation of complement activation, lectin  | 2  | 0.258398 | 0.068852 | ENSG00000175899, | 475 | 2   | 13528 | 28.48    | 1 | 0.752332 | 71.46826 |
| blue | GOTERM_BP_FAT | GO:0006873~cellular ion homeostasis                     | 20 | 2.583979 | 0.068897 | ENSG00000185052, | 475 | 374 | 13528 | 1.522995 | 1 | 0.749788 | 71.49267 |
| blue | GOTERM_BP_FAT | GO:0046890~regulation of lipid biosynthetic process     | 5  | 0.645995 | 0.071864 | ENSG00000136931, | 475 | 45  | 13528 | 3.164444 | 1 | 0.762101 | 73.04831 |
| blue | GOTERM_BP_FAT | GO:0050768~negative regulation of neurogenesis          | 5  | 0.645995 | 0.071864 | ENSG00000101144, | 475 | 45  | 13528 | 3.164444 | 1 | 0.762101 | 73.04831 |
| blue | GOTERM_BP_FAT | GO:0048584~positive regulation of response to stimulus  | 14 | 1.808786 | 0.073187 | ENSG00000164342, | 475 | 236 | 13528 | 1.689492 | 1 | 0.765862 | 73.71565 |
| blue | GOTERM_BP_FAT | GO:0015908~fatty acid transport                         | 4  | 0.516796 | 0.073335 | ENSG00000135218, | 475 | 28  | 13528 | 4.068571 | 1 | 0.763907 | 73.78937 |
| blue | GOTERM_BP_FAT | GO:0030334~regulation of cell migration                 | 11 | 1.421189 | 0.073732 | ENSG00000119547, | 475 | 169 | 13528 | 1.853728 | 1 | 0.763169 | 73.98633 |
| blue | GOTERM_BP_FAT | GO:0045834~positive regulation of lipid metabolic proce | 5  | 0.645995 | 0.076636 | ENSG00000186951, | 475 | 46  | 13528 | 3.095652 | 1 | 0.774157 | 75.38318 |
| blue | GOTERM_BP_FAT | GO:0021537~telencephalon development                    | 6  | 0.775194 | 0.077115 | ENSG00000106689, | 475 | 65  | 13528 | 2.628923 | 1 | 0.773761 | 75.60672 |
| blue | GOTERM_BP_FAT | GO:0006022~aminoglycan metabolic process                | 6  | 0.775194 | 0.077115 | ENSG00000173376, | 475 | 65  | 13528 | 2.628923 | 1 | 0.773761 | 75.60672 |
| blue | GOTERM_BP_FAT | GO:0002684~positive regulation of immune system proc    | 14 | 1.808786 | 0.077143 | ENSG00000168918, | 475 | 238 | 13528 | 1.675294 | 1 | 0.77133  | 75.61997 |
| blue | GOTERM_BP_FAT | GO:0044057~regulation of system process                 | 17 | 2.196382 | 0.078919 | ENSG00000114646, | 475 | 309 | 13528 | 1.566861 | 1 | 0.776762 | 76.4318  |
| blue | GOTERM_BP_FAT | GO:0030216~keratinocyte differentiation                 | 6  | 0.775194 | 0.081163 | ENSG00000187173, | 475 | 66  | 13528 | 2.589091 | 1 | 0.784001 | 77.42095 |
| blue | GOTERM_BP_FAT | GO:0006690~icosanoid metabolic process                  | 5  | 0.645995 | 0.081562 | ENSG00000134716, | 475 | 47  | 13528 | 3.029787 | 1 | 0.783235 | 77.59288 |
| blue | GOTERM_BP_FAT | GO:0021904~dorsal/ventral neural tube patterning        | 3  | 0.387597 | 0.08445  | ENSG00000009709, | 475 | 14  | 13528 | 6.102857 | 1 | 0.792759 | 78.79973 |
| blue | GOTERM_BP_FAT | GO:0007263~nitric oxide mediated signal transduction    | 3  | 0.387597 | 0.08445  | ENSG00000135218, | 475 | 14  | 13528 | 6.102857 | 1 | 0.792759 | 78.79973 |
| blue | GOTERM_BP_FAT | GO:0048512~circadian behavior                           | 3  | 0.387597 | 0.08445  | ENSG00000204640, | 475 | 14  | 13528 | 6.102857 | 1 | 0.792759 | 78.79973 |
| blue | GOTERM_BP_FAT | GO:0046068~cGMP metabolic process                       | 3  | 0.387597 | 0.08445  | ENSG00000169418, | 475 | 14  | 13528 | 6.102857 | 1 | 0.792759 | 78.79973 |
| blue | GOTERM_BP_FAT | GO:0030204~chondroitin sulfate metabolic process        | 3  | 0.387597 | 0.08445  | ENSG00000173376, | 475 | 14  | 13528 | 6.102857 | 1 | 0.792759 | 78.79973 |
| blue | GOTERM_BP_FAT | GO:0048589~developmental growth                         | 7  | 0.904393 | 0.084576 | ENSG00000152580, | 475 | 87  | 13528 | 2.291494 | 1 | 0.790876 | 78.85106 |
| blue | GOTERM_BP_FAT | GO:0042698~ovulation cycle                              | 6  | 0.775194 | 0.085322 | ENSG00000204837, | 475 | 67  | 13528 | 2.550448 | 1 | 0.7915   | 79.15193 |
| blue | GOTERM_BP_FAT | GO:0050801~ion homeostasis                              | 21 | 2.713178 | 0.085378 | ENSG00000185052, | 475 | 409 | 13528 | 1.462298 | 1 | 0.78936  | 79.17435 |
| blue | GOTERM_BP_FAT | GO:0045638~negative regulation of myeloid cell differen | 4  | 0.516796 | 0.08642  | ENSG00000168918, | 475 | 30  | 13528 | 3.797333 | 1 | 0.791168 | 79.58739 |
| blue | GOTERM_BP_FAT | GO:0046620~regulation of organ growth                   | 4  | 0.516796 | 0.08642  | ENSG00000183691, | 475 | 30  | 13528 | 3.797333 | 1 | 0.791168 | 79.58739 |
| blue | GOTERM_BP_FAT | GO:0050729~positive regulation of inflammatory respons  | 4  | 0.516796 | 0.08642  | ENSG00000006210, | 475 | 30  | 13528 | 3.797333 | 1 | 0.791168 | 79.58739 |
| blue | GOTERM_BP_FAT | GO:0010721~negative regulation of cell development      | 5  | 0.645995 | 0.086641 | ENSG00000101144, | 475 | 48  | 13528 | 2.966667 | 1 | 0.789715 | 79.67427 |
| blue | GOTERM_BP_FAT | GO:0021915~neural tube development                      | 6  | 0.775194 | 0.089591 | ENSG00000009709, | 475 | 68  | 13528 | 2.512941 | 1 | 0.798825 | 80.79801 |
| blue | GOTERM_BP_FAT | GO:0007398~ectoderm development                         | 12 | 1.550388 | 0.09123  | ENSG00000187173, | 475 | 199 | 13528 | 1.717387 | 1 | 0.802679 | 81.39655 |
| blue | GOTERM_BP_FAT | GO:0001655~urogenital system development                | 8  | 1.033592 | 0.091491 | ENSG00000100170, | 475 | 110 | 13528 | 2.071273 | 1 | 0.801407 | 81.49035 |
| blue | GOTERM_BP_FAT | GO:0055114~oxidation reduction                          | 30 | 3.875969 | 0.092358 | ENSG00000138109, | 475 | 639 | 13528 | 1.337089 | 1 | 0.802364 | 81.79856 |
| blue | GOTERM_BP_FAT | GO:0046456~icosanoid biosynthetic process               | 4  | 0.516796 | 0.093306 | ENSG00000107317, | 475 | 31  | 13528 | 3.674839 | 1 | 0.803597 | 82.12994 |

|      |               |                                                       |     |          |          |                  |     |      |       |          |          |          |          |
|------|---------------|-------------------------------------------------------|-----|----------|----------|------------------|-----|------|-------|----------|----------|----------|----------|
| blue | GOTERM_BP_FAT | GO:0006811~ion transport                              | 35  | 4.521964 | 0.093639 | ENSG00000100170, | 475 | 768  | 13528 | 1.297917 | 1        | 0.80261  | 82.24484 |
| blue | GOTERM_BP_FAT | GO:0007631~feeding behavior                           | 6   | 0.775194 | 0.093969 | ENSG00000197587, | 475 | 69   | 13528 | 2.476522 | 1        | 0.801622 | 82.35824 |
| blue | GOTERM_BP_FAT | GO:0005976~polysaccharide metabolic process           | 8   | 1.033592 | 0.094881 | ENSG00000136250, | 475 | 111  | 13528 | 2.052613 | 1        | 0.802717 | 82.6677  |
| blue | GOTERM_BP_FAT | GO:0042116~macrophage activation                      | 3   | 0.387597 | 0.095257 | ENSG00000164342, | 475 | 15   | 13528 | 5.696    | 1        | 0.801908 | 82.794   |
| blue | GOTERM_BP_FAT | GO:0045124~regulation of bone resorption              | 3   | 0.387597 | 0.095257 | ENSG00000168918, | 475 | 15   | 13528 | 5.696    | 1        | 0.801908 | 82.794   |
| blue | GOTERM_BP_FAT | GO:0046850~regulation of bone remodeling              | 3   | 0.387597 | 0.095257 | ENSG00000168918, | 475 | 15   | 13528 | 5.696    | 1        | 0.801908 | 82.794   |
| blue | GOTERM_BP_FAT | GO:0050773~regulation of dendrite development         | 3   | 0.387597 | 0.095257 | ENSG00000115297, | 475 | 15   | 13528 | 5.696    | 1        | 0.801908 | 82.794   |
| blue | GOTERM_BP_FAT | GO:0001662~behavioral fear response                   | 3   | 0.387597 | 0.095257 | ENSG00000164418, | 475 | 15   | 13528 | 5.696    | 1        | 0.801908 | 82.794   |
| blue | GOTERM_BP_FAT | GO:0002209~behavioral defense response                | 3   | 0.387597 | 0.095257 | ENSG00000164418, | 475 | 15   | 13528 | 5.696    | 1        | 0.801908 | 82.794   |
| blue | GOTERM_BP_FAT | GO:0019725~cellular homeostasis                       | 23  | 2.971576 | 0.098105 | ENSG00000185052, | 475 | 466  | 13528 | 1.405665 | 1        | 0.809663 | 83.72186 |
| blue | GOTERM_BP_FAT | GO:0048705~skeletal system morphogenesis              | 8   | 1.033592 | 0.098339 | ENSG00000133937, | 475 | 112  | 13528 | 2.034286 | 1        | 0.80837  | 83.79597 |
| blue | GOTERM_BP_FAT | GO:0042742~defense response to bacterium              | 8   | 1.033592 | 0.098339 | ENSG00000171855, | 475 | 112  | 13528 | 2.034286 | 1        | 0.80837  | 83.79597 |
| blue | GOTERM_BP_FAT | GO:0019216~regulation of lipid metabolic process      | 8   | 1.033592 | 0.098339 | ENSG00000186951, | 475 | 112  | 13528 | 2.034286 | 1        | 0.80837  | 83.79597 |
| blue | GOTERM_BP_FAT | GO:0007229~integrin-mediated signaling pathway        | 6   | 0.775194 | 0.098454 | ENSG00000008277, | 475 | 70   | 13528 | 2.441143 | 1        | 0.806681 | 83.83225 |
| blue | GOTERM_BP_FAT | GO:0051173~positive regulation of nitrogen compound m | 30  | 3.875969 | 0.098668 | ENSG00000012504, | 475 | 644  | 13528 | 1.326708 | 1        | 0.805335 | 83.89952 |
| blue | GOTERM_CC_FAT | GO:0005576~extracellular region                       | 116 | 14.98708 | 9.36E-09 | ENSG00000143556, | 442 | 2010 | 12782 | 1.668931 | 2.83E-06 | 2.83E-06 | 1.25E-05 |
| blue | GOTERM_CC_FAT | GO:0044421~extracellular region part                  | 66  | 8.527132 | 9.72E-08 | ENSG00000054179, | 442 | 960  | 12782 | 1.98815  | 2.94E-05 | 1.47E-05 | 1.30E-04 |
| blue | GOTERM_CC_FAT | GO:0005615~extracellular space                        | 50  | 6.459948 | 9.26E-07 | ENSG00000137745, | 442 | 685  | 12782 | 2.110843 | 2.80E-04 | 9.33E-05 | 0.001239 |
| blue | GOTERM_CC_FAT | GO:0030054~cell junction                              | 37  | 4.780362 | 5.07E-05 | ENSG00000100170, | 442 | 518  | 12782 | 2.065611 | 0.015201 | 0.003822 | 0.067824 |
| blue | GOTERM_CC_FAT | GO:0044459~plasma membrane part                       | 107 | 13.82429 | 1.38E-04 | ENSG00000114646, | 442 | 2203 | 12782 | 1.404578 | 0.040855 | 0.008308 | 0.18459  |
| blue | GOTERM_CC_FAT | GO:0005886~plasma membrane                            | 165 | 21.31783 | 2.71E-04 | ENSG00000114646, | 442 | 3777 | 12782 | 1.26332  | 0.078676 | 0.013564 | 0.362296 |
| blue | GOTERM_CC_FAT | GO:0031226~intrinsic to plasma membrane               | 61  | 7.881137 | 0.002807 | ENSG00000114646, | 442 | 1215 | 12782 | 1.451878 | 0.572173 | 0.114224 | 3.690819 |
| blue | GOTERM_CC_FAT | GO:0005887~integral to plasma membrane                | 59  | 7.622739 | 0.004153 | ENSG00000114646, | 442 | 1188 | 12782 | 1.436191 | 0.715442 | 0.145383 | 5.414739 |
| blue | GOTERM_CC_FAT | GO:0045202~synapse                                    | 23  | 2.971576 | 0.00581  | ENSG00000068831, | 442 | 355  | 12782 | 1.873596 | 0.827886 | 0.177585 | 7.497843 |
| blue | GOTERM_CC_FAT | GO:0042995~cell projection                            | 38  | 4.909561 | 0.006027 | ENSG00000100170, | 442 | 697  | 12782 | 1.576621 | 0.83889  | 0.166871 | 7.768159 |
| blue | GOTERM_CC_FAT | GO:0043235~receptor complex                           | 11  | 1.421189 | 0.006776 | ENSG00000164418, | 442 | 116  | 12782 | 2.742276 | 0.871698 | 0.170282 | 8.69368  |
| blue | GOTERM_CC_FAT | GO:0045211~postsynaptic membrane                      | 12  | 1.550388 | 0.00703  | ENSG00000164418, | 442 | 135  | 12782 | 2.570538 | 0.881238 | 0.162683 | 9.005649 |
| blue | GOTERM_CC_FAT | GO:0031012~extracellular matrix                       | 22  | 2.842377 | 0.008405 | ENSG00000154485, | 442 | 345  | 12782 | 1.844082 | 0.921849 | 0.178058 | 10.67677 |
| blue | GOTERM_CC_FAT | GO:0044456~synapse part                               | 17  | 2.196382 | 0.01126  | ENSG00000135333, | 442 | 246  | 12782 | 1.998437 | 0.967283 | 0.216729 | 14.05623 |
| blue | GOTERM_CC_FAT | GO:0031091~platelet alpha granule                     | 7   | 0.904393 | 0.01233  | ENSG00000135218, | 442 | 56   | 12782 | 3.614819 | 0.976404 | 0.221027 | 15.29134 |
| blue | GOTERM_CC_FAT | GO:0005578~proteinaceous extracellular matrix         | 20  | 2.583979 | 0.015096 | ENSG00000154485, | 442 | 320  | 12782 | 1.80741  | 0.989884 | 0.249564 | 18.4102  |
| blue | GOTERM_CC_FAT | GO:0015629~actin cytoskeleton                         | 17  | 2.196382 | 0.024084 | ENSG00000133055, | 442 | 269  | 12782 | 1.827566 | 0.999365 | 0.351488 | 27.82662 |
| blue | GOTERM_CC_FAT | GO:0030425~dendrite                                   | 12  | 1.550388 | 0.02575  | ENSG00000164418, | 442 | 163  | 12782 | 2.128973 | 0.999621 | 0.354471 | 29.45761 |
| blue | GOTERM_CC_FAT | GO:0031224~intrinsic to membrane                      | 209 | 27.00258 | 0.037231 | ENSG00000114646, | 442 | 5485 | 12782 | 1.10191  | 0.999899 | 0.452877 | 39.80231 |
| blue | GOTERM_CC_FAT | GO:0033267~axon part                                  | 6   | 0.775194 | 0.037892 | ENSG00000164418, | 442 | 54   | 12782 | 3.213172 | 0.999991 | 0.441943 | 40.35259 |
| blue | GOTERM_CC_FAT | GO:0005912~adherens junction                          | 11  | 1.421189 | 0.042268 | ENSG00000143556, | 442 | 155  | 12782 | 2.052284 | 0.999998 | 0.462635 | 43.88126 |
| blue | GOTERM_CC_FAT | GO:0030141~secretory granule                          | 12  | 1.550388 | 0.047575 | ENSG00000100312, | 442 | 180  | 12782 | 1.927903 | 1        | 0.487838 | 47.90077 |
| blue | GOTERM_CC_FAT | GO:0005624~membrane fraction                          | 38  | 4.909561 | 0.048039 | ENSG00000135218, | 442 | 809  | 12782 | 1.35835  | 1        | 0.476086 | 48.23961 |
| blue | GOTERM_CC_FAT | GO:0043005~neuron projection                          | 19  | 2.45478  | 0.049313 | ENSG00000135333, | 442 | 342  | 12782 | 1.606586 | 1        | 0.470776 | 49.15853 |
| blue | GOTERM_CC_FAT | GO:0016021~integral to membrane                       | 201 | 25.96899 | 0.050153 | ENSG00000114646, | 442 | 5297 | 12782 | 1.097344 | 1        | 0.462899 | 49.75617 |
| blue | GOTERM_CC_FAT | GO:0005626~insoluble fraction                         | 39  | 5.03876  | 0.051023 | ENSG00000135218, | 442 | 839  | 12782 | 1.344247 | 1        | 0.455726 | 50.36804 |
| blue | GOTERM_CC_FAT | GO:0034702~ion channel complex                        | 13  | 1.679587 | 0.051332 | ENSG00000108818, | 442 | 205  | 12782 | 1.833859 | 1        | 0.445352 | 50.58417 |
| blue | GOTERM_CC_FAT | GO:0005884~actin filament                             | 5   | 0.645995 | 0.05189  | ENSG00000007237, | 442 | 41   | 12782 | 3.526653 | 1        | 0.437133 | 50.97127 |
| blue | GOTERM_CC_FAT | GO:0031093~platelet alpha granule lumen               | 5   | 0.645995 | 0.05189  | ENSG00000175899, | 442 | 41   | 12782 | 3.526653 | 1        | 0.437133 | 50.97127 |
| blue | GOTERM_CC_FAT | GO:0000267~cell fraction                              | 48  | 6.20155  | 0.058869 | ENSG00000135218, | 442 | 1083 | 12782 | 1.281709 | 1        | 0.468382 | 55.58485 |
| blue | GOTERM_CC_FAT | GO:0060205~cytoplasmic membrane-bounded vesicle lum   | 5   | 0.645995 | 0.06426  | ENSG00000175899, | 442 | 44   | 12782 | 3.286199 | 1        | 0.487576 | 58.8702  |
| blue | GOTERM_CC_FAT | GO:0005911~cell-cell junction                         | 12  | 1.550388 | 0.06505  | ENSG00000176402, | 442 | 190  | 12782 | 1.826435 | 1        | 0.480694 | 59.33223 |
| blue | GOTERM_CC_FAT | GO:0043025~cell soma                                  | 11  | 1.421189 | 0.065853 | ENSG00000164418, | 442 | 168  | 12782 | 1.893477 | 1        | 0.474232 | 59.79703 |

|      |               |                                                         |    |          |          |                  |     |     |       |          |          |          |          |
|------|---------------|---------------------------------------------------------|----|----------|----------|------------------|-----|-----|-------|----------|----------|----------|----------|
| blue | GOTERM_CC_FAT | GO:0030864~cortical actin cytoskeleton                  | 4  | 0.516796 | 0.070691 | ENSG00000146950, | 442 | 28  | 12782 | 4.131222 | 1        | 0.488771 | 62.49494 |
| blue | GOTERM_CC_FAT | GO:0005903~brush border                                 | 5  | 0.645995 | 0.073287 | ENSG00000100170, | 442 | 46  | 12782 | 3.143321 | 1        | 0.491377 | 63.87221 |
| blue | GOTERM_CC_FAT | GO:0031983~vesicle lumen                                | 5  | 0.645995 | 0.073287 | ENSG00000175899, | 442 | 46  | 12782 | 3.143321 | 1        | 0.491377 | 63.87221 |
| blue | GOTERM_CC_FAT | GO:0070161~anchoring junction                           | 11 | 1.421189 | 0.074526 | ENSG00000143556, | 442 | 172 | 12782 | 1.849442 | 1        | 0.487407 | 64.5128  |
| blue | GOTERM_CC_FAT | GO:0008305~integrin complex                             | 4  | 0.516796 | 0.076914 | ENSG00000156886, | 442 | 29  | 12782 | 3.988766 | 1        | 0.488999 | 65.71835 |
| blue | GOTERM_CC_FAT | GO:0031941~filamentous actin                            | 3  | 0.387597 | 0.092777 | ENSG00000146950, | 442 | 15  | 12782 | 5.78371  | 1        | 0.548296 | 72.81321 |
| blue | GOTERM_CC_FAT | GO:0009986~cell surface                                 | 18 | 2.325581 | 0.09471  | ENSG00000135218, | 442 | 348 | 12782 | 1.495787 | 1        | 0.546501 | 73.57786 |
| blue | GOTERM_CC_FAT | GO:0030424~axon                                         | 10 | 1.29199  | 0.099374 | ENSG00000164418, | 442 | 159 | 12782 | 1.818777 | 1        | 0.555357 | 75.34179 |
| blue | GOTERM_MF_FAT | GO:0005125~cytokine activity                            | 19 | 2.45478  | 2.85E-04 | ENSG00000156234, | 475 | 195 | 12983 | 2.663179 | 0.173457 | 0.173457 | 0.426469 |
| blue | GOTERM_MF_FAT | GO:0016712~oxidoreductase activity, acting on paired do | 7  | 0.904393 | 6.45E-04 | ENSG00000108242, | 475 | 30  | 12983 | 6.377614 | 0.35034  | 0.193985 | 0.962941 |
| blue | GOTERM_MF_FAT | GO:0003700~transcription factor activity                | 56 | 7.235142 | 7.83E-04 | ENSG00000028277, | 475 | 975 | 12983 | 1.569874 | 0.407293 | 0.159999 | 1.166582 |
| blue | GOTERM_MF_FAT | GO:0030246~carbohydrate binding                         | 26 | 3.359173 | 0.001276 | ENSG00000164764, | 475 | 354 | 12983 | 2.007481 | 0.573717 | 0.191976 | 1.89469  |
| blue | GOTERM_MF_FAT | GO:0008009~chemokine activity                           | 8  | 1.033592 | 0.001288 | ENSG00000143184, | 475 | 46  | 12983 | 4.753501 | 0.577219 | 0.158173 | 1.912843 |
| blue | GOTERM_MF_FAT | GO:0020037~heme binding                                 | 13 | 1.679587 | 0.001551 | ENSG00000108242, | 475 | 121 | 12983 | 2.936564 | 0.645358 | 0.158673 | 2.298816 |
| blue | GOTERM_MF_FAT | GO:0043565~sequence-specific DNA binding                | 38 | 4.909561 | 0.001578 | ENSG00000028277, | 475 | 607 | 12983 | 1.711104 | 0.651755 | 0.139888 | 2.338703 |
| blue | GOTERM_MF_FAT | GO:0005509~calcium ion binding                          | 52 | 6.718346 | 0.00173  | ENSG00000143556, | 475 | 919 | 12983 | 1.546569 | 0.685461 | 0.134615 | 2.561482 |
| blue | GOTERM_MF_FAT | GO:0008395~steroid hydroxylase activity                 | 5  | 0.645995 | 0.001737 | ENSG00000108242, | 475 | 15  | 12983 | 9.110877 | 0.686974 | 0.121072 | 2.572023 |
| blue | GOTERM_MF_FAT | GO:0042379~chemokine receptor binding                   | 8  | 1.033592 | 0.001882 | ENSG00000143184, | 475 | 49  | 12983 | 4.46247  | 0.715796 | 0.118215 | 2.782928 |
| blue | GOTERM_MF_FAT | GO:0046906~tetrapyrrole binding                         | 13 | 1.679587 | 0.002668 | ENSG00000108242, | 475 | 129 | 12983 | 2.754451 | 0.832184 | 0.149782 | 3.925163 |
| blue | GOTERM_MF_FAT | GO:0016298~lipase activity                              | 11 | 1.421189 | 0.00351  | ENSG00000136250, | 475 | 100 | 12983 | 3.006589 | 0.904513 | 0.177766 | 5.132881 |
| blue | GOTERM_MF_FAT | GO:0019825~oxygen binding                               | 7  | 0.904393 | 0.004442 | ENSG00000108242, | 475 | 43  | 12983 | 4.449498 | 0.94891  | 0.204498 | 6.454609 |
| blue | GOTERM_MF_FAT | GO:0015267~channel activity                             | 27 | 3.488372 | 0.0048   | ENSG00000165269, | 475 | 412 | 12983 | 1.791216 | 0.95981  | 0.205133 | 6.956852 |
| blue | GOTERM_MF_FAT | GO:0022803~passive transmembrane transporter activity   | 27 | 3.488372 | 0.004995 | ENSG00000165269, | 475 | 413 | 12983 | 1.786879 | 0.964732 | 0.199873 | 7.229157 |
| blue | GOTERM_MF_FAT | GO:0022838~substrate specific channel activity          | 26 | 3.359173 | 0.005928 | ENSG00000165269, | 475 | 398 | 12983 | 1.785549 | 0.981164 | 0.219835 | 8.525433 |
| blue | GOTERM_MF_FAT | GO:0005216~ion channel activity                         | 25 | 3.229974 | 0.007869 | ENSG00000108878, | 475 | 386 | 12983 | 1.770248 | 0.994892 | 0.266854 | 11.16465 |
| blue | GOTERM_MF_FAT | GO:0070330~aromatase activity                           | 5  | 0.645995 | 0.012068 | ENSG00000108242, | 475 | 25  | 12983 | 5.466526 | 0.9997   | 0.362741 | 16.63586 |
| blue | GOTERM_MF_FAT | GO:0008227~amine receptor activity                      | 6  | 0.775194 | 0.01612  | ENSG00000133019, | 475 | 41  | 12983 | 3.999897 | 0.999981 | 0.435238 | 21.61515 |
| blue | GOTERM_MF_FAT | GO:0015276~ligand-gated ion channel activity            | 11 | 1.421189 | 0.01786  | ENSG00000164418, | 475 | 127 | 12983 | 2.367393 | 0.999994 | 0.452235 | 23.66727 |
| blue | GOTERM_MF_FAT | GO:0022834~ligand-gated channel activity                | 11 | 1.421189 | 0.01786  | ENSG00000164418, | 475 | 127 | 12983 | 2.367393 | 0.999994 | 0.452235 | 23.66727 |
| blue | GOTERM_MF_FAT | GO:0005261~cation channel activity                      | 18 | 2.325581 | 0.024344 | ENSG00000108878, | 475 | 275 | 12983 | 1.789045 | 1        | 0.543404 | 30.88086 |
| blue | GOTERM_MF_FAT | GO:0004629~phospholipase C activity                     | 5  | 0.645995 | 0.025299 | ENSG00000133019, | 475 | 31  | 12983 | 4.408489 | 1        | 0.540694 | 31.88725 |
| blue | GOTERM_MF_FAT | GO:0030247~polysaccharide binding                       | 12 | 1.550388 | 0.025633 | ENSG00000101144, | 475 | 154 | 12983 | 2.129815 | 1        | 0.529598 | 32.23625 |
| blue | GOTERM_MF_FAT | GO:0001871~pattern binding                              | 12 | 1.550388 | 0.025633 | ENSG00000101144, | 475 | 154 | 12983 | 2.129815 | 1        | 0.529598 | 32.23625 |
| blue | GOTERM_MF_FAT | GO:0005529~sugar binding                                | 14 | 1.808786 | 0.026729 | ENSG00000115339, | 475 | 195 | 12983 | 1.962343 | 1        | 0.529557 | 33.36998 |
| blue | GOTERM_MF_FAT | GO:0004620~phospholipase activity                       | 8  | 1.033592 | 0.031748 | ENSG00000133019, | 475 | 83  | 12983 | 2.634471 | 1        | 0.577715 | 38.33799 |
| blue | GOTERM_MF_FAT | GO:0004383~guanylate cyclase activity                   | 3  | 0.387597 | 0.032184 | ENSG00000169418, | 475 | 8   | 12983 | 10.24974 | 1        | 0.568492 | 38.75201 |
| blue | GOTERM_MF_FAT | GO:0009055~electron carrier activity                    | 15 | 1.937984 | 0.032341 | ENSG00000108242, | 475 | 221 | 12983 | 1.855156 | 1        | 0.556633 | 38.9009  |
| blue | GOTERM_MF_FAT | GO:0042165~neurotransmitter binding                     | 9  | 1.162791 | 0.0346   | ENSG00000133019, | 475 | 103 | 12983 | 2.388288 | 1        | 0.568317 | 41.00371 |
| blue | GOTERM_MF_FAT | GO:0022836~gated channel activity                       | 19 | 2.45478  | 0.035809 | ENSG00000108878, | 475 | 310 | 12983 | 1.675226 | 1        | 0.568279 | 42.10187 |
| blue | GOTERM_MF_FAT | GO:0008237~metallopeptidase activity                    | 13 | 1.679587 | 0.036191 | ENSG00000154485, | 475 | 183 | 12983 | 1.941662 | 1        | 0.559924 | 42.44494 |
| blue | GOTERM_MF_FAT | GO:0005179~hormone activity                             | 9  | 1.162791 | 0.043889 | ENSG00000197487, | 475 | 108 | 12983 | 2.277719 | 1        | 0.619826 | 48.96214 |
| blue | GOTERM_MF_FAT | GO:0030955~potassium ion binding                        | 10 | 1.29199  | 0.044752 | ENSG00000185052, | 475 | 128 | 12983 | 2.135362 | 1        | 0.615479 | 49.64822 |
| blue | GOTERM_MF_FAT | GO:0004180~carboxypeptidase activity                    | 5  | 0.645995 | 0.044822 | ENSG00000109625, | 475 | 37  | 12983 | 3.693599 | 1        | 0.604759 | 49.70282 |
| blue | GOTERM_MF_FAT | GO:0008235~metalloexopeptidase activity                 | 5  | 0.645995 | 0.048706 | ENSG00000109625, | 475 | 38  | 12983 | 3.596399 | 1        | 0.625075 | 52.68286 |
| blue | GOTERM_MF_FAT | GO:0004745~retinol dehydrogenase activity               | 3  | 0.387597 | 0.049296 | ENSG00000080511, | 475 | 10  | 12983 | 8.199789 | 1        | 0.618949 | 53.12004 |
| blue | GOTERM_MF_FAT | GO:0008144~drug binding                                 | 6  | 0.775194 | 0.056368 | ENSG00000100312, | 475 | 57  | 12983 | 2.877119 | 1        | 0.65924  | 58.08314 |
| blue | GOTERM_MF_FAT | GO:0046873~metal ion transmembrane transporter activ    | 19 | 2.45478  | 0.056562 | ENSG00000108878, | 475 | 328 | 12983 | 1.583293 | 1        | 0.650477 | 58.21187 |
| blue | GOTERM_MF_FAT | GO:0030594~neurotransmitter receptor activity           | 8  | 1.033592 | 0.058647 | ENSG00000133019, | 475 | 95  | 12983 | 2.301695 | 1        | 0.654385 | 59.57519 |

|      |                 |                                                           |    |          |          |                  |     |      |       |          |          |          |          |
|------|-----------------|-----------------------------------------------------------|----|----------|----------|------------------|-----|------|-------|----------|----------|----------|----------|
| blue | GOTERM_MF_FAT   | GO:0005506~iron ion binding                               | 18 | 2.325581 | 0.059959 | ENSG00000108242, | 475 | 308  | 12983 | 1.597362 | 1        | 0.653218 | 60.41077 |
| blue | GOTERM_MF_FAT   | GO:0004435~phosphoinositide phospholipase C activity      | 4  | 0.516796 | 0.061368 | ENSG00000133019, | 475 | 25   | 12983 | 4.373221 | 1        | 0.652726 | 61.29101 |
| blue | GOTERM_MF_FAT   | GO:0004181~metallocarboxypeptidase activity               | 4  | 0.516796 | 0.061368 | ENSG00000109625, | 475 | 25   | 12983 | 4.373221 | 1        | 0.652726 | 61.29101 |
| blue | GOTERM_MF_FAT   | GO:0008238~exopeptidase activity                          | 7  | 0.904393 | 0.061944 | ENSG00000102174, | 475 | 77   | 12983 | 2.484785 | 1        | 0.647196 | 61.64538 |
| blue | GOTERM_MF_FAT   | GO:0005251~delayed rectifier potassium channel activity   | 3  | 0.387597 | 0.068928 | ENSG00000178342, | 475 | 12   | 12983 | 6.833158 | 1        | 0.678865 | 65.70897 |
| blue | GOTERM_MF_FAT   | GO:0030528~transcription regulator activity               | 67 | 8.656331 | 0.069595 | ENSG00000028277, | 475 | 1512 | 12983 | 1.211168 | 1        | 0.673392 | 66.07536 |
| blue | GOTERM_MF_FAT   | GO:0005539~glycosaminoglycan binding                      | 10 | 1.29199  | 0.070786 | ENSG00000101144, | 475 | 140  | 12983 | 1.952331 | 1        | 0.671952 | 66.72055 |
| blue | GOTERM_MF_FAT   | GO:0050840~extracellular matrix binding                   | 4  | 0.516796 | 0.074034 | ENSG00000124466, | 475 | 27   | 12983 | 4.049279 | 1        | 0.680755 | 68.42157 |
| blue | GOTERM_MF_FAT   | GO:0008201~heparin binding                                | 8  | 1.033592 | 0.082604 | ENSG00000101144, | 475 | 103  | 12983 | 2.122923 | 1        | 0.714068 | 72.52907 |
| blue | GOTERM_MF_FAT   | GO:0003714~transcription corepressor activity             | 10 | 1.29199  | 0.083938 | ENSG00000171855, | 475 | 145  | 12983 | 1.885009 | 1        | 0.712362 | 73.12185 |
| blue | HIV_INTERACTION | env:Envelope surface glycoprotein gp120                   | 25 | 3.229974 | 0.002098 | ENSG00000162551, | 40  | 529  | 1394  | 1.646975 | 0.020784 | 0.020784 | 1.253279 |
| blue | INTERPRO        | IPR017970:Homeobox, conserved site                        | 26 | 3.359173 | 5.91E-07 | ENSG00000028277, | 582 | 232  | 16659 | 3.20783  | 5.68E-04 | 5.68E-04 | 9.29E-04 |
| blue | INTERPRO        | IPR001356:Homeobox                                        | 26 | 3.359173 | 7.52E-07 | ENSG00000028277, | 582 | 235  | 16659 | 3.166879 | 7.23E-04 | 3.62E-04 | 0.001182 |
| blue | INTERPRO        | IPR012287:Homeodomain-related                             | 25 | 3.229974 | 3.23E-06 | ENSG00000009709, | 582 | 238  | 16659 | 3.006692 | 0.0031   | 0.001035 | 0.005074 |
| blue | INTERPRO        | IPR001128:Cytochrome P450                                 | 10 | 1.29199  | 2.47E-04 | ENSG00000108242, | 582 | 61   | 16659 | 4.692412 | 0.211177 | 0.057579 | 0.38692  |
| blue | INTERPRO        | IPR017972:Cytochrome P450, conserved site                 | 10 | 1.29199  | 2.80E-04 | ENSG00000108242, | 582 | 62   | 16659 | 4.616728 | 0.235902 | 0.05239  | 0.43875  |
| blue | INTERPRO        | IPR001811:Small chemokine, interleukin-8-like             | 8  | 1.033592 | 4.85E-04 | ENSG00000143184, | 582 | 41   | 16659 | 5.585114 | 0.37287  | 0.07482  | 0.759652 |
| blue | INTERPRO        | IPR017973:Cytochrome P450, C-terminal region              | 9  | 1.162791 | 6.77E-04 | ENSG00000108242, | 582 | 56   | 16659 | 4.600239 | 0.478699 | 0.088862 | 1.058962 |
| blue | INTERPRO        | IPR002401:Cytochrome P450, E-class, group I               | 8  | 1.033592 | 0.001457 | ENSG00000108242, | 582 | 49   | 16659 | 4.673259 | 0.754031 | 0.16081  | 2.266074 |
| blue | INTERPRO        | IPR013098:Immunoglobulin I-set                            | 13 | 1.679587 | 0.003254 | ENSG00000152580, | 582 | 138  | 16659 | 2.696437 | 0.956525 | 0.294182 | 4.995296 |
| blue | INTERPRO        | IPR011511:Variant SH3                                     | 8  | 1.033592 | 0.007326 | ENSG00000126217, | 582 | 65   | 16659 | 3.522918 | 0.999153 | 0.50704  | 10.91654 |
| blue | INTERPRO        | IPR018249:EF-HAND 2                                       | 16 | 2.067183 | 0.008575 | ENSG00000143546, | 582 | 215  | 16659 | 2.130137 | 0.999748 | 0.529142 | 12.66357 |
| blue | INTERPRO        | IPR018247:EF-HAND 1                                       | 16 | 2.067183 | 0.009282 | ENSG00000143546, | 582 | 217  | 16659 | 2.110504 | 0.999873 | 0.526489 | 13.63691 |
| blue | INTERPRO        | IPR001089:Small chemokine, C-X-C                          | 4  | 0.516796 | 0.009293 | ENSG00000156234, | 582 | 13   | 16659 | 8.807296 | 0.999874 | 0.498886 | 13.65247 |
| blue | INTERPRO        | IPR002402:Cytochrome P450, E-class, group II              | 3  | 0.387597 | 0.011321 | ENSG00000160868, | 582 | 5    | 16659 | 17.17423 | 0.999982 | 0.542663 | 16.38911 |
| blue | INTERPRO        | IPR018039:Intermediate filament protein, conserved site   | 8  | 1.033592 | 0.012599 | ENSG00000132688, | 582 | 72   | 16659 | 3.180412 | 0.999995 | 0.556532 | 18.07215 |
| blue | INTERPRO        | IPR016044:Filament                                        | 8  | 1.033592 | 0.012599 | ENSG00000132688, | 582 | 72   | 16659 | 3.180412 | 0.999995 | 0.556532 | 18.07215 |
| blue | INTERPRO        | IPR003598:Immunoglobulin subtype 2                        | 15 | 1.937984 | 0.01292  | ENSG00000169071, | 582 | 205  | 16659 | 2.094418 | 0.999996 | 0.542466 | 18.49084 |
| blue | INTERPRO        | IPR001079:Galectin, carbohydrate recognition domain       | 4  | 0.516796 | 0.014039 | ENSG00000170298, | 582 | 15   | 16659 | 7.63299  | 0.999999 | 0.550711 | 19.93134 |
| blue | INTERPRO        | IPR001452:Src homology-3 domain                           | 15 | 1.937984 | 0.017447 | ENSG00000111816, | 582 | 213  | 16659 | 2.015754 | 1        | 0.609634 | 24.17298 |
| blue | INTERPRO        | IPR013320:Concanavalin A-like lectin/glucanase, subgroup  | 8  | 1.033592 | 0.017747 | ENSG00000165323, | 582 | 77   | 16659 | 2.973892 | 1        | 0.596117 | 24.53633 |
| blue | INTERPRO        | IPR011992:EF-Hand type                                    | 16 | 2.067183 | 0.018697 | ENSG00000143546, | 582 | 236  | 16659 | 1.940591 | 1        | 0.596595 | 25.67503 |
| blue | INTERPRO        | IPR018048:Small chemokine, C-X-C, conserved site          | 4  | 0.516796 | 0.019928 | ENSG00000156234, | 582 | 17   | 16659 | 6.734991 | 1        | 0.602317 | 27.12772 |
| blue | INTERPRO        | IPR006210:EGF-like                                        | 14 | 1.808786 | 0.024203 | ENSG00000114646, | 582 | 201  | 16659 | 1.993691 | 1        | 0.657457 | 31.96821 |
| blue | INTERPRO        | IPR013088:Zinc finger, NHR/GATA-type                      | 6  | 0.775194 | 0.031897 | ENSG00000186951, | 582 | 51   | 16659 | 3.367495 | 1        | 0.742272 | 39.92881 |
| blue | INTERPRO        | IPR002017:Spectrin repeat                                 | 4  | 0.516796 | 0.03518  | ENSG00000126217, | 582 | 21   | 16659 | 5.452135 | 1        | 0.76201  | 43.053   |
| blue | INTERPRO        | IPR018248:EF hand                                         | 10 | 1.29199  | 0.038329 | ENSG00000143546, | 582 | 130  | 16659 | 2.201824 | 1        | 0.777736 | 45.90566 |
| blue | INTERPRO        | IPR001664:Intermediate filament protein                   | 7  | 0.904393 | 0.041767 | ENSG00000132688, | 582 | 73   | 16659 | 2.744739 | 1        | 0.793731 | 48.8676  |
| blue | INTERPRO        | IPR000203:GPS                                             | 5  | 0.645995 | 0.0424   | ENSG00000144820, | 582 | 38   | 16659 | 3.766278 | 1        | 0.786398 | 49.39585 |
| blue | INTERPRO        | IPR000834:Peptidase M14, carboxypeptidase A               | 4  | 0.516796 | 0.044518 | ENSG00000109625, | 582 | 23   | 16659 | 4.978037 | 1        | 0.790832 | 51.12783 |
| blue | INTERPRO        | IPR000906:ZU5                                             | 3  | 0.387597 | 0.045387 | ENSG00000151150, | 582 | 10   | 16659 | 8.587113 | 1        | 0.7858   | 51.82196 |
| blue | INTERPRO        | IPR013032:EGF-like region, conserved site                 | 17 | 2.196382 | 0.051984 | ENSG00000114646, | 582 | 293  | 16659 | 1.660761 | 1        | 0.819465 | 56.79775 |
| blue | INTERPRO        | IPR013787:S100/CaBP-9k-type, calcium binding, subdoma     | 4  | 0.516796 | 0.066447 | ENSG00000196420, | 582 | 27   | 16659 | 4.24055  | 1        | 0.881602 | 66.0739  |
| blue | INTERPRO        | IPR019391:Storkhead-box protein, winged-helix domain      | 2  | 0.258398 | 0.068538 | ENSG00000173320, | 582 | 2    | 16659 | 28.62371 | 1        | 0.881688 | 67.24891 |
| blue | INTERPRO        | IPR001751:S100/CaBP-9k-type, calcium binding              | 4  | 0.516796 | 0.07257  | ENSG00000196420, | 582 | 28   | 16659 | 4.089102 | 1        | 0.888777 | 69.40835 |
| blue | INTERPRO        | IPR013513:Integrin alpha chain, C-terminal, cytoplasmic r | 3  | 0.387597 | 0.073468 | ENSG00000156886, | 582 | 13   | 16659 | 6.605472 | 1        | 0.884563 | 69.87058 |
| blue | INTERPRO        | IPR001628:Zinc finger, nuclear hormone receptor-type      | 5  | 0.645995 | 0.075683 | ENSG00000186951, | 582 | 46   | 16659 | 3.111273 | 1        | 0.885034 | 70.98315 |
| blue | INTERPRO        | IPR000832:GPCR, family 2, secretin-like                   | 5  | 0.645995 | 0.075683 | ENSG00000215644, | 582 | 46   | 16659 | 3.111273 | 1        | 0.885034 | 70.98315 |



|      |                 |                                                          |     |          |          |                  |     |      |       |          |          |          |          |
|------|-----------------|----------------------------------------------------------|-----|----------|----------|------------------|-----|------|-------|----------|----------|----------|----------|
| blue | INTERPRO        | IPR000884:Thrombospondin, type 1 repeat                  | 6   | 0.775194 | 0.076021 | ENSG00000143341, | 582 | 65   | 16659 | 2.642189 | 1        | 0.879104 | 71.14989 |
| blue | INTERPRO        | IPR000742:EGF-like, type 3                               | 12  | 1.550388 | 0.077883 | ENSG00000149256, | 582 | 194  | 16659 | 1.770539 | 1        | 0.878538 | 72.05022 |
| blue | INTERPRO        | IPR001723:Steroid hormone receptor                       | 5   | 0.645995 | 0.080555 | ENSG00000186951, | 582 | 47   | 16659 | 3.045076 | 1        | 0.880705 | 73.29686 |
| blue | INTERPRO        | IPR003585:Neurexin/syndecan/glycophorin C                | 3   | 0.387597 | 0.083792 | ENSG00000175161, | 582 | 14   | 16659 | 6.133652 | 1        | 0.884515 | 74.73696 |
| blue | INTERPRO        | IPR003654:Paired-like homeodomain protein, OAR           | 3   | 0.387597 | 0.083792 | ENSG00000197587, | 582 | 14   | 16659 | 6.133652 | 1        | 0.884515 | 74.73696 |
| blue | INTERPRO        | IPR000536:Nuclear hormone receptor, ligand-binding, co   | 5   | 0.645995 | 0.085579 | ENSG00000186951, | 582 | 48   | 16659 | 2.981637 | 1        | 0.883704 | 75.50081 |
| blue | INTERPRO        | IPR008946:Nuclear hormone receptor, ligand-binding       | 5   | 0.645995 | 0.085579 | ENSG00000186951, | 582 | 48   | 16659 | 2.981637 | 1        | 0.883704 | 75.50081 |
| blue | INTERPRO        | IPR017983:GPCR, family 2, secretin-like, conserved site  | 5   | 0.645995 | 0.085579 | ENSG00000215644, | 582 | 48   | 16659 | 2.981637 | 1        | 0.883704 | 75.50081 |
| blue | INTERPRO        | IPR018159:Spectrin/alpha-actinin                         | 4   | 0.516796 | 0.092358 | ENSG00000126217, | 582 | 31   | 16659 | 3.693382 | 1        | 0.897073 | 78.20567 |
| blue | INTERPRO        | IPR008085:Thrombospondin, type 1 repeat, subgroup        | 3   | 0.387597 | 0.094523 | ENSG00000143341, | 582 | 15   | 16659 | 5.724742 | 1        | 0.89713  | 79.00856 |
| blue | INTERPRO        | IPR001064:Beta and gamma crystallin                      | 3   | 0.387597 | 0.094523 | ENSG00000168582, | 582 | 15   | 16659 | 5.724742 | 1        | 0.89713  | 79.00856 |
| blue | INTERPRO        | IPR013151:Immunoglobulin                                 | 12  | 1.550388 | 0.096638 | ENSG00000152580, | 582 | 202  | 16659 | 1.700418 | 1        | 0.897071 | 79.76633 |
| blue | KEGG_PATHWAY    | hsa00830:Retinol metabolism                              | 10  | 1.29199  | 8.80E-05 | ENSG00000108242, | 179 | 54   | 5085  | 5.260708 | 0.011891 | 0.011891 | 0.103204 |
| blue | KEGG_PATHWAY    | hsa04080:Neuroactive ligand-receptor interaction         | 22  | 2.842377 | 2.02E-04 | ENSG00000160013, | 179 | 256  | 5085  | 2.441297 | 0.027042 | 0.013614 | 0.236353 |
| blue | KEGG_PATHWAY    | hsa00982:Drug metabolism                                 | 10  | 1.29199  | 2.64E-04 | ENSG00000108242, | 179 | 62   | 5085  | 4.581907 | 0.03522  | 0.011881 | 0.309012 |
| blue | KEGG_PATHWAY    | hsa00591:Linoleic acid metabolism                        | 7   | 0.904393 | 3.35E-04 | ENSG00000108242, | 179 | 28   | 5085  | 7.101955 | 0.044551 | 0.011329 | 0.392607 |
| blue | KEGG_PATHWAY    | hsa04060:Cytokine-cytokine receptor interaction          | 19  | 2.45478  | 0.004346 | ENSG00000156234, | 179 | 262  | 5085  | 2.060109 | 0.447006 | 0.111732 | 4.984907 |
| blue | KEGG_PATHWAY    | hsa00980:Metabolism of xenobiotics by cytochrome P450    | 8   | 1.033592 | 0.004611 | ENSG00000108242, | 179 | 60   | 5085  | 3.787709 | 0.466627 | 0.099455 | 5.280718 |
| blue | KEGG_PATHWAY    | hsa00590:Arachidonic acid metabolism                     | 7   | 0.904393 | 0.012857 | ENSG00000108242, | 179 | 56   | 5085  | 3.550978 | 0.827942 | 0.222302 | 14.09341 |
| blue | KEGG_PATHWAY    | hsa04062:Chemokine signaling pathway                     | 13  | 1.679587 | 0.030081 | ENSG00000143184, | 179 | 187  | 5085  | 1.974875 | 0.984295 | 0.405018 | 30.13035 |
| blue | KEGG_PATHWAY    | hsa00983:Drug metabolism                                 | 5   | 0.645995 | 0.062119 | ENSG00000135226, | 179 | 43   | 5085  | 3.303235 | 0.999837 | 0.620581 | 52.89782 |
| blue | KEGG_PATHWAY    | hsa04020:Calcium signaling pathway                       | 11  | 1.421189 | 0.088024 | ENSG00000133019, | 179 | 176  | 5085  | 1.775489 | 0.999996 | 0.714391 | 66.09662 |
| blue | PIR_SUPERFAMILY | PIRSF038749:interferon lambda                            | 3   | 0.387597 | 0.004148 | ENSG00000183709, | 280 | 3    | 7396  | 26.41429 | 0.6916   | 0.6916   | 5.356435 |
| blue | PIR_SUPERFAMILY | PIRSF000045:cytochrome P450 CYP2D6                       | 5   | 0.645995 | 0.013408 | ENSG00000108242, | 280 | 25   | 7396  | 5.282857 | 0.978075 | 0.851929 | 16.37081 |
| blue | PIR_SUPERFAMILY | PIRSF002522:CXC chemokine                                | 4   | 0.516796 | 0.014191 | ENSG00000156234, | 280 | 14   | 7396  | 7.546939 | 0.982489 | 0.740319 | 17.24594 |
| blue | PIR_SUPERFAMILY | PIRSF002353:S-100 protein                                | 4   | 0.516796 | 0.032894 | ENSG00000196420, | 280 | 19   | 7396  | 5.560902 | 0.999923 | 0.90618  | 35.78775 |
| blue | PIR_SUPERFAMILY | PIRSF002281:beta/gamma crystallins                       | 3   | 0.387597 | 0.062298 | ENSG00000168582, | 280 | 11   | 7396  | 7.203896 | 1        | 0.973766 | 57.3398  |
| blue | PIR_SUPERFAMILY | PIRSF800007:secretin receptor-like G protein-coupled rec | 5   | 0.645995 | 0.072392 | ENSG00000215644, | 280 | 42   | 7396  | 3.144558 | 1        | 0.971114 | 63.03665 |
| blue | PIR_SUPERFAMILY | PIRSF000601:tyrosine-protein kinase, proto-oncogene SR   | 3   | 0.387597 | 0.072944 | ENSG00000111816, | 280 | 12   | 7396  | 6.603571 | 1        | 0.953211 | 63.32685 |
| blue | PIR_SUPERFAMILY | PIRSF002352:parvalbumin                                  | 2   | 0.258398 | 0.074028 | ENSG00000122543, | 280 | 2    | 7396  | 26.41429 | 1        | 0.934174 | 63.89075 |
| blue | PIR_SUPERFAMILY | PIRSF002282:cytoskeletal keratin                         | 6   | 0.775194 | 0.07921  | ENSG00000187242, | 280 | 61   | 7396  | 2.598126 | 1        | 0.925346 | 66.47709 |
| blue | SMART           | SM00389:HOX                                              | 26  | 3.359173 | 3.96E-06 | ENSG00000028277, | 352 | 235  | 9079  | 2.853651 | 8.24E-04 | 8.24E-04 | 0.004998 |
| blue | SMART           | SM00199:SCY                                              | 8   | 1.033592 | 8.78E-04 | ENSG00000143184, | 352 | 41   | 9079  | 5.032705 | 0.166955 | 0.087287 | 1.101695 |
| blue | SMART           | SM00276:GLECT                                            | 4   | 0.516796 | 0.018442 | ENSG00000170298, | 352 | 15   | 9079  | 6.87803  | 0.979179 | 0.724895 | 20.92796 |
| blue | SMART           | SM00408:IGc2                                             | 15  | 1.937984 | 0.02752  | ENSG00000169071, | 352 | 205  | 9079  | 1.887264 | 0.996986 | 0.765693 | 29.67345 |
| blue | SMART           | SM00326:SH3                                              | 15  | 1.937984 | 0.036399 | ENSG00000111816, | 352 | 213  | 9079  | 1.816381 | 0.999553 | 0.786144 | 37.35709 |
| blue | SMART           | SM00181:EGF                                              | 14  | 1.808786 | 0.047911 | ENSG00000114646, | 352 | 201  | 9079  | 1.7965   | 0.999963 | 0.817687 | 46.16953 |
| blue | SMART           | SM00218:ZUS                                              | 3   | 0.387597 | 0.054623 | ENSG00000151150, | 352 | 10   | 9079  | 7.737784 | 0.999992 | 0.811585 | 50.76554 |
| blue | SMART           | SM00631:Zn_pept                                          | 4   | 0.516796 | 0.057255 | ENSG00000109625, | 352 | 23   | 9079  | 4.485672 | 0.999995 | 0.784101 | 52.46665 |
| blue | SMART           | SM00303:GPS                                              | 5   | 0.645995 | 0.057746 | ENSG00000144820, | 352 | 38   | 9079  | 3.393765 | 0.999996 | 0.747071 | 52.77775 |
| blue | SMART           | SM00294:4.1m                                             | 3   | 0.387597 | 0.09989  | ENSG00000175161, | 352 | 14   | 9079  | 5.526989 | 1        | 0.887967 | 73.48673 |
| blue | SP_PIR_KEYWORDS | signal                                                   | 179 | 23.12661 | 2.36E-12 | ENSG00000114646, | 644 | 3250 | 19235 | 1.645038 | 1.05E-09 | 1.05E-09 | 3.34E-09 |
| blue | SP_PIR_KEYWORDS | glycoprotein                                             | 209 | 27.00258 | 2.83E-09 | ENSG00000114646, | 644 | 4318 | 19235 | 1.445673 | 1.26E-06 | 6.32E-07 | 4.01E-06 |
| blue | SP_PIR_KEYWORDS | Secreted                                                 | 102 | 13.17829 | 5.32E-09 | ENSG00000143556, | 644 | 1689 | 19235 | 1.803752 | 2.38E-06 | 7.92E-07 | 7.54E-06 |
| blue | SP_PIR_KEYWORDS | disulfide bond                                           | 152 | 19.63824 | 1.28E-08 | ENSG00000114646, | 644 | 2924 | 19235 | 1.552646 | 5.74E-06 | 1.44E-06 | 1.82E-05 |
| blue | SP_PIR_KEYWORDS | Homeobox                                                 | 27  | 3.488372 | 1.71E-07 | ENSG00000028277, | 644 | 242  | 19235 | 3.332382 | 7.65E-05 | 1.53E-05 | 2.43E-04 |
| blue | SP_PIR_KEYWORDS | developmental protein                                    | 52  | 6.718346 | 3.83E-06 | ENSG00000114646, | 644 | 779  | 19235 | 1.993757 | 0.001708 | 2.85E-04 | 0.005421 |
| blue | SP_PIR_KEYWORDS | cell junction                                            | 32  | 4.134367 | 1.29E-05 | ENSG00000095637, | 644 | 399  | 19235 | 2.39543  | 0.005741 | 8.22E-04 | 0.018256 |

|      |                 |                                    |     |          |          |                  |     |       |       |          |          |          |          |
|------|-----------------|------------------------------------|-----|----------|----------|------------------|-----|-------|-------|----------|----------|----------|----------|
| blue | SP_PIR_KEYWORDS | cytokine                           | 19  | 2.45478  | 3.81E-05 | ENSG00000143546, | 644 | 181   | 19235 | 3.135316 | 0.016868 | 0.002124 | 0.053927 |
| blue | SP_PIR_KEYWORDS | Monooxygenase                      | 12  | 1.550388 | 5.44E-05 | ENSG00000108242, | 644 | 78    | 19235 | 4.595079 | 0.024015 | 0.002697 | 0.077047 |
| blue | SP_PIR_KEYWORDS | calcium                            | 49  | 6.330749 | 7.40E-05 | ENSG00000143556, | 644 | 803   | 19235 | 1.822581 | 0.032519 | 0.0033   | 0.104769 |
| blue | SP_PIR_KEYWORDS | microsome                          | 13  | 1.679587 | 2.20E-04 | ENSG00000108242, | 644 | 106   | 19235 | 3.663058 | 0.093638 | 0.008898 | 0.311254 |
| blue | SP_PIR_KEYWORDS | transmembrane protein              | 39  | 5.03876  | 4.94E-04 | ENSG00000135218, | 644 | 642   | 19235 | 1.814412 | 0.198288 | 0.018249 | 0.698314 |
| blue | SP_PIR_KEYWORDS | chemotaxis                         | 10  | 1.29199  | 6.41E-04 | ENSG00000143184, | 644 | 72    | 19235 | 4.148335 | 0.24916  | 0.021802 | 0.904515 |
| blue | SP_PIR_KEYWORDS | heme                               | 13  | 1.679587 | 7.44E-04 | ENSG00000108242, | 644 | 121   | 19235 | 3.20896  | 0.282872 | 0.02347  | 1.048749 |
| blue | SP_PIR_KEYWORDS | synapse                            | 18  | 2.325581 | 8.44E-04 | ENSG00000068831, | 644 | 213   | 19235 | 2.524057 | 0.314327 | 0.024843 | 1.18938  |
| blue | SP_PIR_KEYWORDS | ionic channel                      | 23  | 2.971576 | 0.001094 | ENSG00000108878, | 644 | 318   | 19235 | 2.160265 | 0.386887 | 0.030113 | 1.539196 |
| blue | SP_PIR_KEYWORDS | cleavage on pair of basic residues | 20  | 2.583979 | 0.001999 | ENSG00000197487, | 644 | 271   | 19235 | 2.204281 | 0.591175 | 0.051256 | 2.796327 |
| blue | SP_PIR_KEYWORDS | pancreas                           | 5   | 0.645995 | 0.002604 | ENSG00000129538, | 644 | 18    | 19235 | 8.29667  | 0.688263 | 0.062703 | 3.628388 |
| blue | SP_PIR_KEYWORDS | polymorphism                       | 421 | 54.39276 | 0.00294  | ENSG00000198521, | 644 | 11550 | 19235 | 1.088696 | 0.731816 | 0.066923 | 4.087145 |
| blue | SP_PIR_KEYWORDS | postsynaptic cell membrane         | 11  | 1.421189 | 0.0038   | ENSG00000164418, | 644 | 110   | 19235 | 2.986801 | 0.817639 | 0.081569 | 5.252941 |
| blue | SP_PIR_KEYWORDS | membrane                           | 242 | 31.26615 | 0.003894 | ENSG00000114646, | 644 | 6256  | 19235 | 1.15538  | 0.82516  | 0.079687 | 5.379377 |
| blue | SP_PIR_KEYWORDS | inflammatory response              | 9   | 1.162791 | 0.004135 | ENSG00000197272, | 644 | 77    | 19235 | 3.491066 | 0.843083 | 0.080738 | 5.703321 |
| blue | SP_PIR_KEYWORDS | metalloprotease                    | 13  | 1.679587 | 0.004836 | ENSG00000154485, | 644 | 151   | 19235 | 2.571418 | 0.885476 | 0.089914 | 6.640265 |
| blue | SP_PIR_KEYWORDS | electron transfer                  | 7   | 0.904393 | 0.006208 | ENSG00000108242, | 644 | 50    | 19235 | 4.181522 | 0.93819  | 0.109513 | 8.44816  |
| blue | SP_PIR_KEYWORDS | ion transport                      | 32  | 4.134367 | 0.006759 | ENSG00000100170, | 644 | 578   | 19235 | 1.653592 | 0.951757 | 0.114196 | 9.164714 |
| blue | SP_PIR_KEYWORDS | cell membrane                      | 95  | 12.2739  | 0.006979 | ENSG00000114646, | 644 | 2194  | 19235 | 1.293282 | 0.956308 | 0.113441 | 9.449685 |
| blue | SP_PIR_KEYWORDS | lipid degradation                  | 9   | 1.162791 | 0.008039 | ENSG00000203837, | 644 | 86    | 19235 | 3.125722 | 0.972891 | 0.125083 | 10.80978 |
| blue | SP_PIR_KEYWORDS | lipoprotein                        | 34  | 4.392765 | 0.009676 | ENSG00000135218, | 644 | 642   | 19235 | 1.581795 | 0.987042 | 0.14377  | 12.87305 |
| blue | SP_PIR_KEYWORDS | Intermediate filament              | 8   | 1.033592 | 0.015388 | ENSG00000132688, | 644 | 78    | 19235 | 3.063386 | 0.999024 | 0.212605 | 19.73126 |
| blue | SP_PIR_KEYWORDS | iron                               | 18  | 2.325581 | 0.01567  | ENSG00000108242, | 644 | 285   | 19235 | 1.886401 | 0.999141 | 0.209696 | 20.05742 |
| blue | SP_PIR_KEYWORDS | extracellular matrix               | 16  | 2.067183 | 0.015854 | ENSG00000137745, | 644 | 241   | 19235 | 1.982939 | 0.99921  | 0.205817 | 20.26898 |
| blue | SP_PIR_KEYWORDS | chondroitin sulfate proteoglycan   | 4   | 0.516796 | 0.017822 | ENSG00000049089, | 644 | 17    | 19235 | 7.027768 | 0.999677 | 0.222128 | 22.4986  |
| blue | SP_PIR_KEYWORDS | Lectin                             | 12  | 1.550388 | 0.018026 | ENSG00000115339, | 644 | 159   | 19235 | 2.25419  | 0.999706 | 0.218384 | 22.72612 |
| blue | SP_PIR_KEYWORDS | carboxypeptidase                   | 5   | 0.645995 | 0.02118  | ENSG00000109625, | 644 | 32    | 19235 | 4.666877 | 0.99993  | 0.24531  | 26.17111 |
| blue | SP_PIR_KEYWORDS | differentiation                    | 25  | 3.229974 | 0.021227 | ENSG00000114646, | 644 | 460   | 19235 | 1.623262 | 0.999932 | 0.239686 | 26.22165 |
| blue | SP_PIR_KEYWORDS | zymogen                            | 14  | 1.808786 | 0.021431 | ENSG00000136250, | 644 | 206   | 19235 | 2.029865 | 0.999938 | 0.235852 | 26.43869 |
| blue | SP_PIR_KEYWORDS | egf-like domain                    | 15  | 1.937984 | 0.022917 | ENSG00000114646, | 644 | 230   | 19235 | 1.947914 | 0.999968 | 0.244281 | 28.00641 |
| blue | SP_PIR_KEYWORDS | sh3 domain                         | 14  | 1.808786 | 0.025056 | ENSG00000111816, | 644 | 210   | 19235 | 1.991201 | 0.999988 | 0.258064 | 30.20812 |
| blue | SP_PIR_KEYWORDS | potassium                          | 10  | 1.29199  | 0.025629 | ENSG00000185052, | 644 | 126   | 19235 | 2.370477 | 0.999991 | 0.257386 | 30.78744 |
| blue | SP_PIR_KEYWORDS | gpi-anchor                         | 10  | 1.29199  | 0.025629 | ENSG00000124466, | 644 | 126   | 19235 | 2.370477 | 0.999991 | 0.257386 | 30.78744 |
| blue | SP_PIR_KEYWORDS | transmembrane                      | 189 | 24.4186  | 0.026146 | ENSG00000114646, | 644 | 4973  | 19235 | 1.135141 | 0.999993 | 0.256262 | 31.3058  |
| blue | SP_PIR_KEYWORDS | cgrp biosynthesis                  | 3   | 0.387597 | 0.027328 | ENSG00000169418, | 644 | 8     | 19235 | 11.2005  | 0.999996 | 0.260728 | 32.47846 |
| blue | SP_PIR_KEYWORDS | voltage-gated channel              | 11  | 1.421189 | 0.029353 | ENSG00000168135, | 644 | 150   | 19235 | 2.190321 | 0.999998 | 0.271725 | 34.44363 |
| blue | SP_PIR_KEYWORDS | proteoglycan                       | 6   | 0.775194 | 0.033864 | ENSG00000114646, | 644 | 54    | 19235 | 3.318668 | 1        | 0.301012 | 38.63171 |
| blue | SP_PIR_KEYWORDS | nadp                               | 11  | 1.421189 | 0.036952 | ENSG00000080511, | 644 | 156   | 19235 | 2.106078 | 1        | 0.317854 | 41.3545  |
| blue | SP_PIR_KEYWORDS | potassium transport                | 9   | 1.162791 | 0.039114 | ENSG00000185052, | 644 | 115   | 19235 | 2.337497 | 1        | 0.327216 | 43.19278 |
| blue | SP_PIR_KEYWORDS | neurotransmitter receptor          | 6   | 0.775194 | 0.041375 | ENSG00000164418, | 644 | 57    | 19235 | 3.144001 | 1        | 0.336757 | 45.05868 |
| blue | SP_PIR_KEYWORDS | dna-binding                        | 77  | 9.94832  | 0.041421 | ENSG00000198521, | 644 | 1868  | 19235 | 1.231176 | 1        | 0.331238 | 45.09549 |
| blue | SP_PIR_KEYWORDS | phosphorus-oxygen lyase            | 3   | 0.387597 | 0.042025 | ENSG00000169418, | 644 | 10    | 19235 | 8.960404 | 1        | 0.329561 | 45.58449 |
| blue | SP_PIR_KEYWORDS | Immunoglobulin domain              | 24  | 3.100775 | 0.043682 | ENSG00000133055, | 644 | 470   | 19235 | 1.525175 | 1        | 0.33466  | 46.9035  |
| blue | SP_PIR_KEYWORDS | cell adhesion                      | 22  | 2.842377 | 0.045538 | ENSG00000135218, | 644 | 422   | 19235 | 1.5571   | 1        | 0.340765 | 48.34552 |
| blue | SP_PIR_KEYWORDS | liver                              | 6   | 0.775194 | 0.046899 | ENSG00000160868, | 644 | 59    | 19235 | 3.037425 | 1        | 0.343615 | 49.37945 |
| blue | SP_PIR_KEYWORDS | integrin                           | 5   | 0.645995 | 0.04725  | ENSG00000008277, | 644 | 41    | 19235 | 3.642441 | 1        | 0.340369 | 49.64271 |
| blue | SP_PIR_KEYWORDS | deafness                           | 8   | 1.033592 | 0.050305 | ENSG00000166866, | 644 | 100   | 19235 | 2.389441 | 1        | 0.352939 | 51.88396 |
| blue | SP_PIR_KEYWORDS | palmitate                          | 13  | 1.679587 | 0.054674 | ENSG00000163746, | 644 | 213   | 19235 | 1.82293  | 1        | 0.372128 | 54.92767 |

|      |                 |                                                        |     |          |          |                  |     |       |       |          |          |          |          |
|------|-----------------|--------------------------------------------------------|-----|----------|----------|------------------|-----|-------|-------|----------|----------|----------|----------|
| blue | SP_PIR_KEYWORDS | chromoprotein                                          | 6   | 0.775194 | 0.055967 | ENSG00000108242, | 644 | 62    | 19235 | 2.890453 | 1        | 0.373797 | 55.79366 |
| blue | SP_PIR_KEYWORDS | metalloprotein                                         | 9   | 1.162791 | 0.056454 | ENSG00000108242, | 644 | 124   | 19235 | 2.16784  | 1        | 0.371136 | 56.11567 |
| blue | SP_PIR_KEYWORDS | oxidoreductase                                         | 27  | 3.488372 | 0.059371 | ENSG00000138109, | 644 | 562   | 19235 | 1.43494  | 1        | 0.381208 | 58.00003 |
| blue | SP_PIR_KEYWORDS | hormone                                                | 7   | 0.904393 | 0.071138 | ENSG00000197487, | 644 | 87    | 19235 | 2.403173 | 1        | 0.433758 | 64.8636  |
| blue | SP_PIR_KEYWORDS | Chondrogenesis                                         | 3   | 0.387597 | 0.077871 | ENSG00000054938, | 644 | 14    | 19235 | 6.400288 | 1        | 0.458934 | 68.30615 |
| blue | SP_PIR_KEYWORDS | receptor                                               | 64  | 8.268734 | 0.084226 | ENSG00000135333, | 644 | 1583  | 19235 | 1.207551 | 1        | 0.480815 | 71.26517 |
| blue | SP_PIR_KEYWORDS | plasma                                                 | 7   | 0.904393 | 0.0913   | ENSG00000175899, | 644 | 93    | 19235 | 2.24813  | 1        | 0.504194 | 74.25588 |
| blue | SP_PIR_KEYWORDS | Short QT syndrome                                      | 2   | 0.258398 | 0.096976 | ENSG00000053918, | 644 | 3     | 19235 | 19.91201 | 1        | 0.5207   | 76.44356 |
| blue | SP_PIR_KEYWORDS | carboxylic ester hydrolase                             | 3   | 0.387597 | 0.098336 | ENSG00000136250, | 644 | 16    | 19235 | 5.600252 | 1        | 0.52023  | 76.94136 |
| blue | UP_SEQ_FEATURE  | signal peptide                                         | 179 | 23.12661 | 4.12E-12 | ENSG00000114646, | 644 | 3250  | 19113 | 1.634604 | 7.72E-09 | 7.72E-09 | 7.04E-09 |
| blue | UP_SEQ_FEATURE  | disulfide bond                                         | 149 | 19.25065 | 9.86E-09 | ENSG00000114646, | 644 | 2819  | 19113 | 1.568679 | 1.85E-05 | 9.23E-06 | 1.68E-05 |
| blue | UP_SEQ_FEATURE  | glycosylation site:N-linked (GlcNAc...)                | 200 | 25.83979 | 1.22E-08 | ENSG00000114646, | 644 | 4129  | 19113 | 1.437567 | 2.28E-05 | 7.60E-06 | 2.08E-05 |
| blue | UP_SEQ_FEATURE  | DNA-binding region:Homeobox                            | 24  | 3.100775 | 1.14E-07 | ENSG00000009709, | 644 | 190   | 19113 | 3.748872 | 2.13E-04 | 5.34E-05 | 1.95E-04 |
| blue | UP_SEQ_FEATURE  | topological domain:Extracellular                       | 129 | 16.66667 | 3.72E-05 | ENSG00000114646, | 644 | 2719  | 19113 | 1.408068 | 0.067343 | 0.013847 | 0.063517 |
| blue | UP_SEQ_FEATURE  | topological domain:Cytoplasmic                         | 151 | 19.50904 | 1.27E-04 | ENSG00000114646, | 644 | 3374  | 19113 | 1.328235 | 0.211661 | 0.038862 | 0.216508 |
| blue | UP_SEQ_FEATURE  | metal ion-binding site:Iron (heme axial ligand)        | 11  | 1.421189 | 0.001696 | ENSG00000108242, | 644 | 98    | 19113 | 3.331268 | 0.958332 | 0.364918 | 2.854731 |
| blue | UP_SEQ_FEATURE  | region of interest:Head                                | 9   | 1.162791 | 0.003083 | ENSG00000132688, | 644 | 73    | 19113 | 3.659002 | 0.996913 | 0.514489 | 5.13162  |
| blue | UP_SEQ_FEATURE  | region of interest:Linker 12                           | 8   | 1.033592 | 0.005571 | ENSG00000132688, | 644 | 64    | 19113 | 3.709821 | 0.999971 | 0.687121 | 9.090307 |
| blue | UP_SEQ_FEATURE  | sequence variant                                       | 434 | 56.07235 | 0.007564 | ENSG00000198521, | 644 | 11992 | 19113 | 1.074091 | 0.999999 | 0.758613 | 12.14957 |
| blue | UP_SEQ_FEATURE  | compositionally biased region:Poly-Ala                 | 24  | 3.100775 | 0.007573 | ENSG00000009709, | 644 | 393   | 19113 | 1.812432 | 0.999999 | 0.725731 | 12.16284 |
| blue | UP_SEQ_FEATURE  | region of interest:Coil 1B                             | 8   | 1.033592 | 0.009052 | ENSG00000132688, | 644 | 70    | 19113 | 3.391837 | 1        | 0.757947 | 14.37048 |
| blue | UP_SEQ_FEATURE  | region of interest:Linker 1                            | 8   | 1.033592 | 0.009052 | ENSG00000132688, | 644 | 70    | 19113 | 3.391837 | 1        | 0.757947 | 14.37048 |
| blue | UP_SEQ_FEATURE  | region of interest:Coil 1A                             | 8   | 1.033592 | 0.009052 | ENSG00000132688, | 644 | 70    | 19113 | 3.391837 | 1        | 0.757947 | 14.37048 |
| blue | UP_SEQ_FEATURE  | lipid moiety-binding region:GPI-anchor amidated serine | 7   | 0.904393 | 0.009293 | ENSG00000007306, | 644 | 54    | 19113 | 3.847222 | 1        | 0.73932  | 14.7247  |
| blue | UP_SEQ_FEATURE  | region of interest:Rod                                 | 8   | 1.033592 | 0.009759 | ENSG00000132688, | 644 | 71    | 19113 | 3.344064 | 1        | 0.730556 | 15.40702 |
| blue | UP_SEQ_FEATURE  | region of interest:Tail                                | 8   | 1.033592 | 0.012995 | ENSG00000132688, | 644 | 75    | 19113 | 3.165714 | 1        | 0.804534 | 20.00039 |
| blue | UP_SEQ_FEATURE  | domain:Galectin 1                                      | 3   | 0.387597 | 0.015491 | ENSG00000170298, | 644 | 6     | 19113 | 14.83929 | 1        | 0.839049 | 23.3833  |
| blue | UP_SEQ_FEATURE  | domain:Galectin 2                                      | 3   | 0.387597 | 0.015491 | ENSG00000170298, | 644 | 6     | 19113 | 14.83929 | 1        | 0.839049 | 23.3833  |
| blue | UP_SEQ_FEATURE  | domain:SH3                                             | 13  | 1.679587 | 0.016789 | ENSG00000074966, | 644 | 177   | 19113 | 2.179782 | 1        | 0.845012 | 25.08762 |
| blue | UP_SEQ_FEATURE  | domain:Ig-like C2-type                                 | 9   | 1.162791 | 0.022869 | ENSG00000138615, | 644 | 103   | 19113 | 2.593273 | 1        | 0.909822 | 32.61056 |
| blue | UP_SEQ_FEATURE  | compositionally biased region:Poly-Pro                 | 23  | 2.971576 | 0.023269 | ENSG00000149256, | 644 | 413   | 19113 | 1.652802 | 1        | 0.901701 | 33.08029 |
| blue | UP_SEQ_FEATURE  | propeptide:Removed in mature form                      | 15  | 1.937984 | 0.023304 | ENSG00000124466, | 644 | 229   | 19113 | 1.944011 | 1        | 0.889977 | 33.12069 |
| blue | UP_SEQ_FEATURE  | transmembrane region                                   | 188 | 24.28941 | 0.026291 | ENSG00000114646, | 644 | 4911  | 19113 | 1.136138 | 1        | 0.906984 | 36.52542 |
| blue | UP_SEQ_FEATURE  | domain:Guanylate cyclase                               | 3   | 0.387597 | 0.027654 | ENSG00000169418, | 644 | 8     | 19113 | 11.12946 | 1        | 0.908029 | 38.02515 |
| blue | UP_SEQ_FEATURE  | domain:GPS                                             | 5   | 0.645995 | 0.031905 | ENSG00000144820, | 644 | 36    | 19113 | 4.122024 | 1        | 0.928574 | 42.48824 |
| blue | UP_SEQ_FEATURE  | calcium-binding region:2; high affinity                | 4   | 0.516796 | 0.03211  | ENSG00000196420, | 644 | 21    | 19113 | 5.653061 | 1        | 0.921578 | 42.69563 |
| blue | UP_SEQ_FEATURE  | domain:ZU5                                             | 3   | 0.387597 | 0.034774 | ENSG00000151150, | 644 | 9     | 19113 | 9.892857 | 1        | 0.929366 | 45.32824 |
| blue | UP_SEQ_FEATURE  | domain:Ig-like C2-type 6                               | 5   | 0.645995 | 0.034852 | ENSG00000152580, | 644 | 37    | 19113 | 4.010618 | 1        | 0.92224  | 45.40355 |
| blue | UP_SEQ_FEATURE  | domain:Ig-like C2-type 7                               | 4   | 0.516796 | 0.036275 | ENSG00000152580, | 644 | 22    | 19113 | 5.396104 | 1        | 0.922838 | 46.76095 |
| blue | UP_SEQ_FEATURE  | lipid moiety-binding region:S-palmitoyl cysteine       | 12  | 1.550388 | 0.042724 | ENSG00000163746, | 644 | 181   | 19113 | 1.96764  | 1        | 0.946023 | 52.52231 |
| blue | UP_SEQ_FEATURE  | domain:EF-hand 2                                       | 12  | 1.550388 | 0.044158 | ENSG00000196420, | 644 | 182   | 19113 | 1.956829 | 1        | 0.945814 | 53.72157 |
| blue | UP_SEQ_FEATURE  | domain:EF-hand 1                                       | 12  | 1.550388 | 0.044158 | ENSG00000196420, | 644 | 182   | 19113 | 1.956829 | 1        | 0.945814 | 53.72157 |
| blue | UP_SEQ_FEATURE  | domain:Kringle                                         | 3   | 0.387597 | 0.050828 | ENSG00000169071, | 644 | 11    | 19113 | 8.094156 | 1        | 0.961423 | 58.93265 |
| blue | UP_SEQ_FEATURE  | domain:VWFA                                            | 6   | 0.775194 | 0.057212 | ENSG00000143341, | 644 | 62    | 19113 | 2.87212  | 1        | 0.971495 | 63.39925 |
| blue | UP_SEQ_FEATURE  | repeat:LRR 18                                          | 4   | 0.516796 | 0.060963 | ENSG00000179542, | 644 | 27    | 19113 | 4.396825 | 1        | 0.974769 | 65.80549 |
| blue | UP_SEQ_FEATURE  | region of interest:Coil 2                              | 6   | 0.775194 | 0.063905 | ENSG00000187242, | 644 | 64    | 19113 | 2.782366 | 1        | 0.976392 | 67.5881  |
| blue | UP_SEQ_FEATURE  | DNA-binding region:Nuclear receptor                    | 5   | 0.645995 | 0.06392  | ENSG00000186951, | 644 | 45    | 19113 | 3.297619 | 1        | 0.973665 | 67.59675 |
| blue | UP_SEQ_FEATURE  | zinc finger region:NR C4-type                          | 5   | 0.645995 | 0.06392  | ENSG00000186951, | 644 | 45    | 19113 | 3.297619 | 1        | 0.973665 | 67.59675 |

|       |                |                                                           |       |          |          |                  |            |          |           |            |           |           |          |
|-------|----------------|-----------------------------------------------------------|-------|----------|----------|------------------|------------|----------|-----------|------------|-----------|-----------|----------|
| blue  | UP_SEQ_FEATURE | chain:Oncomodulin                                         | 2     | 0.258398 | 0.066154 | ENSG00000122543, | 644        | 2        | 19113     | 29.67857   | 1         | 0.974287  | 68.89114 |
| blue  | UP_SEQ_FEATURE | binding site:Substrate                                    | 16    | 2.067183 | 0.077905 | ENSG00000103485, | 644        | 297      | 19113     | 1.598846   | 1         | 0.985265  | 74.93552 |
| blue  | UP_SEQ_FEATURE | region of interest:Ligand-binding                         | 4     | 0.516796 | 0.078674 | ENSG00000186951, | 644        | 30       | 19113     | 3.957143   | 1         | 0.984169  | 75.28961 |
| blue  | UP_SEQ_FEATURE | glycosylation site:O-linked (Xyl...) (glycosaminoglycan)  | 3     | 0.387597 | 0.078736 | ENSG00000179399, | 644        | 14       | 19113     | 6.359694   | 1         | 0.982403  | 75.31814 |
| blue  | UP_SEQ_FEATURE | domain:Beta/gamma crystallin 'Greek key' 4                | 3     | 0.387597 | 0.078736 | ENSG00000168582, | 644        | 14       | 19113     | 6.359694   | 1         | 0.982403  | 75.31814 |
| blue  | UP_SEQ_FEATURE | short sequence motif:OAR                                  | 3     | 0.387597 | 0.078736 | ENSG00000197587, | 644        | 14       | 19113     | 6.359694   | 1         | 0.982403  | 75.31814 |
| blue  | UP_SEQ_FEATURE | domain:Beta/gamma crystallin 'Greek key' 2                | 3     | 0.387597 | 0.088888 | ENSG00000168582, | 644        | 15       | 19113     | 5.935714   | 1         | 0.988533  | 79.56967 |
| blue  | UP_SEQ_FEATURE | domain:Beta/gamma crystallin 'Greek key' 1                | 3     | 0.387597 | 0.088888 | ENSG00000168582, | 644        | 15       | 19113     | 5.935714   | 1         | 0.988533  | 79.56967 |
| blue  | UP_SEQ_FEATURE | short sequence motif:GFFKR motif                          | 3     | 0.387597 | 0.088888 | ENSG00000156886, | 644        | 15       | 19113     | 5.935714   | 1         | 0.988533  | 79.56967 |
| blue  | UP_SEQ_FEATURE | domain:Beta/gamma crystallin 'Greek key' 3                | 3     | 0.387597 | 0.088888 | ENSG00000168582, | 644        | 15       | 19113     | 5.935714   | 1         | 0.988533  | 79.56967 |
| blue  | UP_SEQ_FEATURE | region of interest:Beta-galactoside binding 1             | 2     | 0.258398 | 0.097574 | ENSG00000170298, | 644        | 3        | 19113     | 19.78571   | 1         | 0.99181   | 82.64975 |
| blue  | UP_SEQ_FEATURE | repeat:DUF1309_1                                          | 2     | 0.258398 | 0.097574 | ENSG00000181781, | 644        | 3        | 19113     | 19.78571   | 1         | 0.99181   | 82.64975 |
| blue  | UP_SEQ_FEATURE | domain:ASD1                                               | 2     | 0.258398 | 0.097574 | ENSG00000146950, | 644        | 3        | 19113     | 19.78571   | 1         | 0.99181   | 82.64975 |
| blue  | UP_SEQ_FEATURE | region of interest:Beta-galactoside binding 2             | 2     | 0.258398 | 0.097574 | ENSG00000170298, | 644        | 3        | 19113     | 19.78571   | 1         | 0.99181   | 82.64975 |
| blue  | UP_SEQ_FEATURE | DNA-binding region:CUT                                    | 2     | 0.258398 | 0.097574 | ENSG00000119547, | 644        | 3        | 19113     | 19.78571   | 1         | 0.99181   | 82.64975 |
| blue  | UP_SEQ_FEATURE | repeat:DUF1309_2                                          | 2     | 0.258398 | 0.097574 | ENSG00000181781, | 644        | 3        | 19113     | 19.78571   | 1         | 0.99181   | 82.64975 |
| blue  | UP_SEQ_FEATURE | DNA-binding region:T-box                                  | 3     | 0.387597 | 0.099401 | ENSG00000121075, | 644        | 16       | 19113     | 5.564732   | 1         | 0.991606  | 83.23934 |
| brown | BIOCARTA       | h_mhcPathway:Antigen Processing and Presentation          | 3     | 0.332226 | 0.013947 | ENSG00000204287, | 28         | 10       | 1437      | 15.39643   | 0.587228  | 0.587228  | 13.25671 |
| brown | BIOCARTA       | h_tcrPathway:Lck and Fyn tyrosine kinases in initiation o | 3     | 0.332226 | 0.01685  | ENSG00000204287, | 28         | 11       | 1437      | 13.99675   | 0.657199  | 0.414508  | 15.80803 |
| brown | BIOCARTA       | h_ctlPathway:CTL mediated immune response against tar     | 3     | 0.332226 | 0.030715 | ENSG00000180644, | 28         | 15       | 1437      | 10.26429   | 0.859895  | 0.480621  | 27.08524 |
| brown | BIOCARTA       | h_CSKPathway:Activation of Csk by cAMP-dependent Pro      | 3     | 0.332226 | 0.038876 | ENSG00000204287, | 28         | 17       | 1437      | 9.056723   | 0.917758  | 0.464482  | 33.06843 |
| brown | BIOCARTA       | h_ctla4Pathway:The Co-Stimulatory Signal During T-cell A  | 3     | 0.332226 | 0.04777  | ENSG00000204287, | 28         | 19       | 1437      | 8.103383   | 0.954213  | 0.460304  | 39.08121 |
| brown | BIOCARTA       | h_th1th2Pathway:Th1/Th2 Differentiation                   | 3     | 0.332226 | 0.052471 | ENSG00000204287, | 28         | 20       | 1437      | 7.698214   | 0.966479  | 0.432169  | 42.05922 |
| brown | BIOCARTA       | h_inflamPathway:Cytokines and Inflammatory Response       | 3     | 0.332226 | 0.083801 | ENSG00000204287, | 28         | 26       | 1437      | 5.921703   | 0.995969  | 0.545106  | 58.7781  |
| brown | Category       | Term                                                      | Count | %        | Pvalue   | Genes            | List Total | Pop Hits | Pop Total | Fold Enric | Bonferron | Benjamini | FDR      |
| brown | GOTERM_BP_FAT  | GO:0007608~sensory perception of smell                    | 136   | 15.06091 | 1.54E-87 | ENSG00000221931, | 530        | 431      | 13528     | 8.054144   | 2.65E-84  | 2.65E-84  | 2.61E-84 |
| brown | GOTERM_BP_FAT  | GO:0007606~sensory perception of chemical stimulus        | 141   | 15.61462 | 1.50E-86 | ENSG00000221931, | 530        | 478      | 13528     | 7.529202   | 2.58E-83  | 1.29E-83  | 2.54E-83 |
| brown | GOTERM_BP_FAT  | GO:0007186~G-protein coupled receptor protein signalin    | 196   | 21.70543 | 1.73E-79 | ENSG00000178394, | 530        | 1123     | 13528     | 4.45486    | 2.97E-76  | 9.90E-77  | 2.92E-76 |
| brown | GOTERM_BP_FAT  | GO:0007600~sensory perception                             | 157   | 17.38649 | 2.35E-68 | ENSG00000221931, | 530        | 810      | 13528     | 4.947347   | 4.02E-65  | 1.01E-65  | 3.96E-65 |
| brown | GOTERM_BP_FAT  | GO:0050890~cognition                                      | 157   | 17.38649 | 5.05E-61 | ENSG00000221931, | 530        | 909      | 13528     | 4.408527   | 8.65E-58  | 1.73E-58  | 8.52E-58 |
| brown | GOTERM_BP_FAT  | GO:0007166~cell surface receptor linked signal transduct  | 212   | 23.4773  | 8.31E-53 | ENSG00000178394, | 530        | 1856     | 13528     | 2.915517   | 1.42E-49  | 2.37E-50  | 1.40E-49 |
| brown | GOTERM_BP_FAT  | GO:0050877~neurological system process                    | 166   | 18.38317 | 2.80E-50 | ENSG00000221931, | 530        | 1210     | 13528     | 3.501712   | 4.80E-47  | 6.85E-48  | 4.72E-47 |
| brown | GOTERM_BP_FAT  | GO:0042742~defense response to bacterium                  | 20    | 2.214839 | 6.17E-08 | ENSG00000203970, | 530        | 112      | 13528     | 4.557951   | 1.06E-04  | 1.32E-05  | 1.04E-04 |
| brown | GOTERM_BP_FAT  | GO:0009617~response to bacterium                          | 20    | 2.214839 | 2.04E-04 | ENSG00000203970, | 530        | 193      | 13528     | 2.645029   | 0.295107  | 0.038111  | 0.343879 |
| brown | GOTERM_BP_FAT  | GO:0006952~defense response                               | 43    | 4.761905 | 3.03E-04 | ENSG00000088827, | 530        | 615      | 13528     | 1.784642   | 0.404631  | 0.050536  | 0.509505 |
| brown | GOTERM_BP_FAT  | GO:0007586~digestion                                      | 12    | 1.328904 | 8.22E-04 | ENSG00000137392, | 530        | 91       | 13528     | 3.365872   | 0.755523  | 0.120197  | 1.377955 |
| brown | GOTERM_BP_FAT  | GO:0009566~fertilization                                  | 11    | 1.218162 | 9.78E-04 | ENSG00000118245, | 530        | 79       | 13528     | 3.554048   | 0.813239  | 0.130491  | 1.639213 |
| brown | GOTERM_BP_FAT  | GO:0007218~neuropeptide signaling pathway                 | 12    | 1.328904 | 9.87E-04 | ENSG00000105954, | 530        | 93       | 13528     | 3.293488   | 0.815829  | 0.122032  | 1.652745 |
| brown | GOTERM_BP_FAT  | GO:0006955~immune response                                | 43    | 4.761905 | 0.00292  | ENSG00000173369, | 530        | 690      | 13528     | 1.590659   | 0.993342  | 0.300924  | 4.817    |
| brown | GOTERM_BP_FAT  | GO:0042953~lipoprotein transport                          | 4     | 0.442968 | 0.005808 | ENSG00000081479, | 530        | 10       | 13528     | 10.20981   | 0.999954  | 0.486031  | 9.366255 |
| brown | GOTERM_BP_FAT  | GO:0007338~single fertilization                           | 7     | 0.775194 | 0.029245 | ENSG00000118245, | 530        | 60       | 13528     | 2.977862   | 1         | 0.958399  | 39.41492 |
| brown | GOTERM_BP_FAT  | GO:0019953~sexual reproduction                            | 27    | 2.990033 | 0.03666  | ENSG00000118245, | 530        | 458      | 13528     | 1.504721   | 1         | 0.976848  | 46.77163 |
| brown | GOTERM_BP_FAT  | GO:0007602~phototransduction                              | 5     | 0.55371  | 0.038587 | ENSG00000122375, | 530        | 33       | 13528     | 3.867353   | 1         | 0.976413  | 48.54029 |
| brown | GOTERM_BP_FAT  | GO:0019932~second-messenger-mediated signaling            | 16    | 1.771872 | 0.043043 | ENSG00000178394, | 530        | 235      | 13528     | 1.73784    | 1         | 0.981107  | 52.42249 |
| brown | GOTERM_BP_FAT  | GO:0007603~phototransduction, visible light               | 3     | 0.332226 | 0.045788 | ENSG00000198691, | 530        | 9        | 13528     | 8.508176   | 1         | 0.981988  | 54.67513 |
| brown | GOTERM_BP_FAT  | GO:0007200~activation of phospholipase C activity by G    | 6     | 0.664452 | 0.051713 | ENSG00000110148, | 530        | 52       | 13528     | 2.945138   | 1         | 0.986883  | 59.19935 |
| brown | GOTERM_BP_FAT  | GO:0044241~lipid digestion                                | 3     | 0.332226 | 0.055783 | ENSG00000143921, | 530        | 10       | 13528     | 7.657358   | 1         | 0.988575  | 62.05734 |
| brown | GOTERM_BP_FAT  | GO:0009583~detection of light stimulus                    | 5     | 0.55371  | 0.064741 | ENSG00000122375, | 530        | 39       | 13528     | 3.272375   | 1         | 0.99318   | 67.69765 |

|       |                          |                                                         |     |          |          |                  |     |      |       |          |          |          |          |
|-------|--------------------------|---------------------------------------------------------|-----|----------|----------|------------------|-----|------|-------|----------|----------|----------|----------|
| brown | GOTERM_BP_FAT            | GO:0055006~cardiac cell development                     | 3   | 0.332226 | 0.066456 | ENSG00000163217, | 530 | 11   | 13528 | 6.961235 | 1        | 0.992636 | 68.68322 |
| brown | GOTERM_BP_FAT            | GO:0055013~cardiac muscle cell development              | 3   | 0.332226 | 0.066456 | ENSG00000163217, | 530 | 11   | 13528 | 6.961235 | 1        | 0.992636 | 68.68322 |
| brown | GOTERM_BP_FAT            | GO:0060193~positive regulation of lipase activity       | 7   | 0.775194 | 0.072764 | ENSG00000110148, | 530 | 75   | 13528 | 2.382289 | 1        | 0.994369 | 72.07064 |
| brown | GOTERM_BP_FAT            | GO:0070170~regulation of tooth mineralization           | 2   | 0.221484 | 0.076682 | ENSG00000137674, | 530 | 2    | 13528 | 25.52453 | 1        | 0.994802 | 73.99742 |
| brown | GOTERM_BP_FAT            | GO:0048663~neuron fate commitment                       | 5   | 0.55371  | 0.080548 | ENSG00000115844, | 530 | 42   | 13528 | 3.038634 | 1        | 0.995161 | 75.77577 |
| brown | GOTERM_BP_FAT            | GO:0050909~sensory perception of taste                  | 5   | 0.55371  | 0.092047 | ENSG00000169777, | 530 | 44   | 13528 | 2.900515 | 1        | 0.997291 | 80.41305 |
| brown | GOTERM_CC_FAT            | GO:0005886~plasma membrane                              | 269 | 29.78959 | 5.16E-23 | ENSG00000178394, | 547 | 3777 | 12782 | 1.664243 | 1.27E-20 | 1.27E-20 | 6.69E-20 |
| brown | GOTERM_CC_FAT            | GO:0031224~intrinsic to membrane                        | 321 | 35.54817 | 3.65E-14 | ENSG00000088827, | 547 | 5485 | 12782 | 1.36754  | 8.99E-12 | 4.49E-12 | 4.73E-11 |
| brown | GOTERM_CC_FAT            | GO:0016021~integral to membrane                         | 312 | 34.5515  | 6.29E-14 | ENSG00000088827, | 547 | 5297 | 12782 | 1.376373 | 1.55E-11 | 5.15E-12 | 8.14E-11 |
| brown | GOTERM_CC_FAT            | GO:0005576~extracellular region                         | 146 | 16.16833 | 2.42E-11 | ENSG00000173369, | 547 | 2010 | 12782 | 1.697338 | 5.96E-09 | 1.49E-09 | 3.14E-08 |
| brown | GOTERM_CC_FAT            | GO:0005882~intermediate filament                        | 27  | 2.990033 | 6.60E-08 | ENSG00000204889, | 547 | 183  | 12782 | 3.447658 | 1.62E-05 | 3.25E-06 | 8.55E-05 |
| brown | GOTERM_CC_FAT            | GO:0045111~intermediate filament cytoskeleton           | 27  | 2.990033 | 1.03E-07 | ENSG00000204889, | 547 | 187  | 12782 | 3.373911 | 2.53E-05 | 4.22E-06 | 1.33E-04 |
| brown | GOTERM_CC_FAT            | GO:0045095~keratin filament                             | 16  | 1.771872 | 4.20E-06 | ENSG00000139648, | 547 | 88   | 12782 | 4.248629 | 0.001034 | 1.48E-04 | 0.005447 |
| brown | GOTERM_CC_FAT            | GO:0044447~axoneme part                                 | 4   | 0.442968 | 0.033724 | ENSG00000168454, | 547 | 17   | 12782 | 5.498226 | 0.999784 | 0.651775 | 35.88783 |
| brown | GOTERM_CC_FAT            | GO:0045179~apical cortex                                | 3   | 0.332226 | 0.042979 | ENSG00000163586, | 547 | 8    | 12782 | 8.762797 | 0.99998  | 0.699033 | 43.40475 |
| brown | GOTERM_CC_FAT            | GO:0045177~apical part of cell                          | 14  | 1.550388 | 0.043337 | ENSG00000091138, | 547 | 179  | 12782 | 1.827622 | 0.999982 | 0.663743 | 43.67831 |
| brown | GOTERM_CC_FAT            | GO:0005903~brush border                                 | 6   | 0.664452 | 0.045375 | ENSG00000091138, | 547 | 46   | 12782 | 3.047929 | 0.999989 | 0.64601  | 45.21325 |
| brown | GOTERM_CC_FAT            | GO:0016324~apical plasma membrane                       | 11  | 1.218162 | 0.05857  | ENSG00000169344, | 547 | 133  | 12782 | 1.932647 | 1        | 0.709826 | 54.25451 |
| brown | GOTERM_CC_FAT            | GO:0005615~extracellular space                          | 39  | 4.318937 | 0.059396 | ENSG00000173369, | 547 | 685  | 12782 | 1.33041  | 1        | 0.686114 | 54.77242 |
| brown | GOTERM_CC_FAT            | GO:0009434~microtubule-based flagellum                  | 4   | 0.442968 | 0.072854 | ENSG00000168454, | 547 | 23   | 12782 | 4.063906 | 1        | 0.735306 | 62.47641 |
| brown | GOTERM_CC_FAT            | GO:0005930~axoneme                                      | 5   | 0.55371  | 0.096413 | ENSG00000138892, | 547 | 41   | 12782 | 2.84969  | 1        | 0.810369 | 73.118   |
| brown | GOTERM_MF_FAT            | GO:0004984~olfactory receptor activity                  | 137 | 15.17165 | 5.47E-89 | ENSG00000221931, | 509 | 431  | 12983 | 8.107754 | 2.94E-86 | 2.94E-86 | 7.95E-86 |
| brown | GOTERM_MF_FAT            | GO:0003823~antigen binding                              | 13  | 1.439646 | 1.31E-06 | ENSG00000211899, | 509 | 56   | 12983 | 5.921239 | 7.04E-04 | 3.52E-04 | 0.001908 |
| brown | GOTERM_MF_FAT            | GO:0001653~peptide receptor activity                    | 13  | 1.439646 | 0.001663 | ENSG00000110148, | 509 | 114  | 12983 | 2.908679 | 0.590841 | 0.257612 | 2.391438 |
| brown | GOTERM_MF_FAT            | GO:0008528~peptide receptor activity, G-protein coupled | 13  | 1.439646 | 0.001663 | ENSG00000110148, | 509 | 114  | 12983 | 2.908679 | 0.590841 | 0.257612 | 2.391438 |
| brown | GOTERM_MF_FAT            | GO:0001584~rhodopsin-like receptor activity             | 4   | 0.442968 | 0.01006  | ENSG00000157219, | 509 | 12   | 12983 | 8.502292 | 0.995615 | 0.74267  | 13.67603 |
| brown | GOTERM_MF_FAT            | GO:0008188~neuropeptide receptor activity               | 6   | 0.664452 | 0.019129 | ENSG00000110148, | 509 | 40   | 12983 | 3.826031 | 0.999969 | 0.874368 | 24.49196 |
| brown | GOTERM_MF_FAT            | GO:0042923~neuropeptide binding                         | 6   | 0.664452 | 0.021107 | ENSG00000110148, | 509 | 41   | 12983 | 3.732714 | 0.999989 | 0.851821 | 26.6767  |
| brown | GOTERM_MF_FAT            | GO:0005212~structural constituent of eye lens           | 4   | 0.442968 | 0.026904 | ENSG00000105370, | 509 | 17   | 12983 | 6.001618 | 1        | 0.876588 | 32.74529 |
| brown | GOTERM_MF_FAT            | GO:0004982~N-formyl peptide receptor activity           | 3   | 0.332226 | 0.028157 | ENSG00000187474, | 509 | 7    | 12983 | 10.93152 | 1        | 0.852972 | 33.99315 |
| brown | GOTERM_MF_FAT            | GO:0042277~peptide binding                              | 15  | 1.66113  | 0.028619 | ENSG00000204287, | 509 | 203  | 12983 | 1.884745 | 1        | 0.823162 | 34.4486  |
| brown | GOTERM_MF_FAT            | GO:0005529~sugar binding                                | 14  | 1.550388 | 0.042948 | ENSG00000156575, | 509 | 195  | 12983 | 1.831263 | 1        | 0.905323 | 47.19061 |
| brown | GOTERM_MF_FAT            | GO:0005179~hormone activity                             | 9   | 0.996678 | 0.061083 | ENSG00000134200, | 509 | 108  | 12983 | 2.125573 | 1        | 0.953898 | 60.0177  |
| brown | GOTERM_MF_FAT            | GO:0030246~carbohydrate binding                         | 21  | 2.325581 | 0.062354 | ENSG00000088827, | 509 | 354  | 12983 | 1.51312  | 1        | 0.943929 | 60.798   |
| brown | GOTERM_MF_FAT            | GO:0048029~monosaccharide binding                       | 5   | 0.55371  | 0.069926 | ENSG00000118004, | 509 | 40   | 12983 | 3.18836  | 1        | 0.949935 | 65.15908 |
| brown | GOTERM_MF_FAT            | GO:0008227~amine receptor activity                      | 5   | 0.55371  | 0.075204 | ENSG00000157219, | 509 | 41   | 12983 | 3.110595 | 1        | 0.950155 | 67.92674 |
| brown | GOTERM_MF_FAT            | GO:0004951~cholecystokinin receptor activity            | 2   | 0.221484 | 0.076728 | ENSG00000110148, | 509 | 2    | 12983 | 25.50688 | 1        | 0.942615 | 68.68715 |
| brown | GOTERM_MF_FAT            | GO:0018685~alkane 1-monooxygenase activity              | 2   | 0.221484 | 0.076728 | ENSG00000162365, | 509 | 2    | 12983 | 25.50688 | 1        | 0.942615 | 68.68715 |
| brown | GOTERM_MF_FAT            | GO:0017127~cholesterol transporter activity             | 3   | 0.332226 | 0.077818 | ENSG00000084674, | 509 | 12   | 12983 | 6.376719 | 1        | 0.934059 | 69.22063 |
| brown | GOTERM_MF_FAT            | GO:0030594~neurotransmitter receptor activity           | 8   | 0.885936 | 0.07852  | ENSG00000110148, | 509 | 95   | 12983 | 2.147947 | 1        | 0.924461 | 69.55959 |
| brown | GOTERM_MF_FAT            | GO:0004993~serotonin receptor activity                  | 3   | 0.332226 | 0.089657 | ENSG00000157219, | 509 | 13   | 12983 | 5.886202 | 1        | 0.939334 | 74.49419 |
| brown | HIV_INTERACTION          | gag:capsid                                              | 7   | 0.775194 | 2.98E-05 | ENSG00000204287, | 31  | 31   | 1394  | 10.15401 | 4.17E-04 | 4.17E-04 | 0.020249 |
| brown | HIV_INTERACTION          | env:Envelope transmembrane glycoprotein gp41            | 10  | 1.10742  | 0.003277 | ENSG00000173369, | 31  | 152  | 1394  | 2.958404 | 0.044917 | 0.022717 | 2.205197 |
| brown | HIV_INTERACTION          | env:Envelope surface glycoprotein gp120                 | 20  | 2.214839 | 0.003892 | ENSG00000196126, | 31  | 529  | 1394  | 1.700104 | 0.053128 | 0.018033 | 2.614061 |
| brown | HIV_INTERACTION_CATEGORY | gag:Pr55(Gag) relocalizes                               | 3   | 0.332226 | 0.002617 | ENSG00000204287, | 31  | 4    | 1394  | 33.72581 | 0.158797 | 0.158797 | 2.643257 |
| brown | HIV_INTERACTION_CATEGORY | env:Envelope surface glycoprotein gp120 interacts with  | 10  | 1.10742  | 0.002716 | ENSG00000173369, | 31  | 148  | 1394  | 3.038361 | 0.164328 | 0.085849 | 2.742703 |
| brown | HIV_INTERACTION_CATEGORY | gag:Pr55(Gag) relocalized by                            | 3   | 0.332226 | 0.004303 | ENSG00000204287, | 31  | 5    | 1394  | 26.98065 | 0.247676 | 0.090502 | 4.312922 |
| brown | HIV_INTERACTION_CATEGORY | gag:capsid downregulates                                | 3   | 0.332226 | 0.004303 | ENSG00000204287, | 31  | 5    | 1394  | 26.98065 | 0.247676 | 0.090502 | 4.312922 |

|       |                          |                                                            |     |          |          |                  |     |     |       |          |          |          |          |
|-------|--------------------------|------------------------------------------------------------|-----|----------|----------|------------------|-----|-----|-------|----------|----------|----------|----------|
| brown | HIV_INTERACTION_CATEGORY | env:Envelope transmembrane glycoprotein gp41 upregul       | 5   | 0.55371  | 0.007738 | ENSG00000204287, | 31  | 38  | 1394  | 5.916808 | 0.40113  | 0.120303 | 7.635423 |
| brown | HIV_INTERACTION_CATEGORY | gag:Pr55(Gag) co-localizes with                            | 3   | 0.332226 | 0.021835 | ENSG00000204287, | 31  | 11  | 1394  | 12.26393 | 0.767081 | 0.252793 | 20.20596 |
| brown | HIV_INTERACTION_CATEGORY | env:Envelope surface glycoprotein gp160, precursor asso    | 3   | 0.332226 | 0.03471  | ENSG00000204287, | 31  | 14  | 1394  | 9.635945 | 0.902855 | 0.321988 | 30.31545 |
| brown | HIV_INTERACTION_CATEGORY | env:Envelope transmembrane glycoprotein gp41 incorpo       | 3   | 0.332226 | 0.03471  | ENSG00000204287, | 31  | 14  | 1394  | 9.635945 | 0.902855 | 0.321988 | 30.31545 |
| brown | HIV_INTERACTION_CATEGORY | env:Envelope surface glycoprotein gp120 inhibits           | 5   | 0.55371  | 0.034819 | ENSG00000204287, | 31  | 59  | 1394  | 3.810826 | 0.903578 | 0.28405  | 30.39606 |
| brown | HIV_INTERACTION_CATEGORY | env:Envelope surface glycoprotein gp120 inhibited by       | 5   | 0.55371  | 0.034819 | ENSG00000108700, | 31  | 59  | 1394  | 3.810826 | 0.903578 | 0.28405  | 30.39606 |
| brown | HIV_INTERACTION_CATEGORY | nef:Nef downregulates                                      | 4   | 0.442968 | 0.062206 | ENSG00000204287, | 31  | 43  | 1394  | 4.183046 | 0.985576 | 0.411313 | 48.14228 |
| brown | HIV_INTERACTION_CATEGORY | env:Envelope surface glycoprotein gp120 upregulates        | 7   | 0.775194 | 0.08514  | ENSG00000204287, | 31  | 146 | 1394  | 2.155988 | 0.997185 | 0.479285 | 59.73997 |
| brown | HIV_INTERACTION_CATEGORY | tat:Tat downregulates                                      | 6   | 0.664452 | 0.086396 | ENSG00000204287, | 31  | 112 | 1394  | 2.408986 | 0.997429 | 0.449188 | 60.30139 |
| brown | INTERPRO                 | IPR017452:GPCR, rhodopsin-like superfamily                 | 174 | 19.2691  | 2.53E-92 | ENSG00000178394, | 636 | 726 | 16659 | 6.277756 | 1.94E-89 | 1.94E-89 | 3.87E-89 |
| brown | INTERPRO                 | IPR000276:7TM GPCR, rhodopsin-like                         | 172 | 19.04762 | 3.47E-90 | ENSG00000178394, | 636 | 727 | 16659 | 6.197062 | 2.66E-87 | 1.33E-87 | 5.29E-87 |
| brown | INTERPRO                 | IPR000725:Olfactory receptor                               | 136 | 15.06091 | 3.59E-88 | ENSG00000221931, | 636 | 428 | 16659 | 8.323135 | 2.76E-85 | 9.19E-86 | 5.48E-85 |
| brown | INTERPRO                 | IPR003596:Immunoglobulin V-set, subgroup                   | 22  | 2.436323 | 8.22E-13 | ENSG00000124557, | 636 | 78  | 16659 | 7.387881 | 6.31E-10 | 1.58E-10 | 1.25E-09 |
| brown | INTERPRO                 | IPR013106:Immunoglobulin V-set                             | 31  | 3.433001 | 2.52E-08 | ENSG00000088827, | 636 | 249 | 16659 | 3.261025 | 1.93E-05 | 3.87E-06 | 3.84E-05 |
| brown | INTERPRO                 | IPR013783:Immunoglobulin-like fold                         | 46  | 5.094131 | 1.44E-06 | ENSG00000124557, | 636 | 553 | 16659 | 2.178836 | 0.001104 | 1.84E-04 | 0.002196 |
| brown | INTERPRO                 | IPR003597:Immunoglobulin C1-set                            | 13  | 1.439646 | 8.74E-06 | ENSG00000204287, | 636 | 68  | 16659 | 5.007561 | 0.006686 | 9.58E-04 | 0.013336 |
| brown | INTERPRO                 | IPR016044:Filament                                         | 12  | 1.328904 | 8.25E-05 | ENSG00000173908, | 636 | 72  | 16659 | 4.365566 | 0.061376 | 0.007886 | 0.12584  |
| brown | INTERPRO                 | IPR001664:Intermediate filament protein                    | 12  | 1.328904 | 9.38E-05 | ENSG00000173908, | 636 | 73  | 16659 | 4.305764 | 0.069518 | 0.007974 | 0.143137 |
| brown | INTERPRO                 | IPR007110:Immunoglobulin-like                              | 38  | 4.208195 | 9.77E-05 | ENSG00000088827, | 636 | 501 | 16659 | 1.986725 | 0.072261 | 0.007472 | 0.148996 |
| brown | INTERPRO                 | IPR015544:Olfactory receptor MOR256                        | 7   | 0.775194 | 1.32E-04 | ENSG00000203664, | 636 | 22  | 16659 | 8.334262 | 0.096744 | 0.009207 | 0.20207  |
| brown | INTERPRO                 | IPR018039:Intermediate filament protein, conserved site    | 11  | 1.218162 | 3.84E-04 | ENSG00000173908, | 636 | 72  | 16659 | 4.001769 | 0.255168 | 0.024251 | 0.58394  |
| brown | INTERPRO                 | IPR003006:Immunoglobulin/major histocompatibility com      | 12  | 1.328904 | 4.56E-04 | ENSG00000204287, | 636 | 87  | 16659 | 3.612882 | 0.295666 | 0.026602 | 0.694371 |
| brown | INTERPRO                 | IPR015539:Olfactory receptor MOR103                        | 4   | 0.442968 | 0.001011 | ENSG00000186440, | 636 | 6   | 16659 | 17.46226 | 0.540254 | 0.053993 | 1.532952 |
| brown | INTERPRO                 | IPR004020:Pyrim                                            | 6   | 0.664452 | 0.001216 | ENSG00000142405, | 636 | 22  | 16659 | 7.143654 | 0.607094 | 0.060379 | 1.840004 |
| brown | INTERPRO                 | IPR002957:Keratin, type I                                  | 7   | 0.775194 | 0.001377 | ENSG00000173908, | 636 | 33  | 16659 | 5.556175 | 0.652826 | 0.063982 | 2.081184 |
| brown | INTERPRO                 | IPR003267:Small proline-rich                               | 6   | 0.664452 | 0.002232 | ENSG00000198854, | 636 | 25  | 16659 | 6.286415 | 0.820173 | 0.096001 | 3.35338  |
| brown | INTERPRO                 | IPR007659:Keratin, high-sulphur matrix protein             | 3   | 0.332226 | 0.00827  | ENSG00000212900, | 636 | 4   | 16659 | 19.64505 | 0.998301 | 0.298341 | 11.90763 |
| brown | INTERPRO                 | IPR002494:Keratin, high sulphur B2 protein                 | 7   | 0.775194 | 0.008515 | ENSG00000196224, | 636 | 47  | 16659 | 3.901144 | 0.998594 | 0.292233 | 12.23907 |
| brown | INTERPRO                 | IPR007111:NACHT nucleoside triphosphatase                  | 5   | 0.55371  | 0.010394 | ENSG00000142405, | 636 | 23  | 16659 | 5.694217 | 0.999673 | 0.330502 | 14.74525 |
| brown | INTERPRO                 | IPR014853:Conserved-cysteine-rich domain                   | 4   | 0.442968 | 0.011844 | ENSG00000205592, | 636 | 13  | 16659 | 8.059507 | 0.999894 | 0.353207 | 16.63205 |
| brown | INTERPRO                 | IPR001855:Beta defensin                                    | 4   | 0.442968 | 0.011844 | ENSG00000203970, | 636 | 13  | 16659 | 8.059507 | 0.999894 | 0.353207 | 16.63205 |
| brown | INTERPRO                 | IPR006207:Cystine knot, C-terminal                         | 5   | 0.55371  | 0.013985 | ENSG00000104415, | 636 | 25  | 16659 | 5.238679 | 0.99998  | 0.388387 | 19.34817 |
| brown | INTERPRO                 | IPR001314:Peptidase S1A, chymotrypsin                      | 10  | 1.10742  | 0.017784 | ENSG00000154646, | 636 | 104 | 16659 | 2.518596 | 0.999999 | 0.450741 | 23.96442 |
| brown | INTERPRO                 | IPR008197:Whey acidic protein, 4-disulphide core           | 4   | 0.442968 | 0.017807 | ENSG00000101443, | 636 | 15  | 16659 | 6.984906 | 0.999999 | 0.437266 | 23.99087 |
| brown | INTERPRO                 | IPR018114:Peptidase S1/S6, chymotrypsin/Hap, active site   | 10  | 1.10742  | 0.018819 | ENSG00000154646, | 636 | 105 | 16659 | 2.494609 | 1        | 0.44213  | 25.17819 |
| brown | INTERPRO                 | IPR003054:Type II keratin                                  | 5   | 0.55371  | 0.020697 | ENSG00000139648, | 636 | 28  | 16659 | 4.677392 | 1        | 0.460858 | 27.3352  |
| brown | INTERPRO                 | IPR001846:von Willebrand factor, type D                    | 4   | 0.442968 | 0.025155 | ENSG00000205592, | 636 | 17  | 16659 | 6.163152 | 1        | 0.515524 | 32.2252  |
| brown | INTERPRO                 | IPR000826:Formyl/methionyl peptide receptor                | 3   | 0.332226 | 0.02682  | ENSG00000187474, | 636 | 7   | 16659 | 11.22574 | 1        | 0.525582 | 33.97021 |
| brown | INTERPRO                 | IPR001254:Peptidase S1 and S6, chymotrypsin/Hap            | 10  | 1.10742  | 0.033229 | ENSG00000154646, | 636 | 116 | 16659 | 2.258051 | 1        | 0.591374 | 40.30693 |
| brown | INTERPRO                 | IPR018378:C-type lectin, conserved site                    | 8   | 0.885936 | 0.03671  | ENSG00000118004, | 636 | 82  | 16659 | 2.555453 | 1        | 0.616138 | 43.50575 |
| brown | INTERPRO                 | IPR011029:DEATH-like                                       | 7   | 0.775194 | 0.042051 | ENSG00000142405, | 636 | 67  | 16659 | 2.736623 | 1        | 0.655041 | 48.10349 |
| brown | INTERPRO                 | IPR002231:5-Hydroxytryptamine receptor                     | 3   | 0.332226 | 0.043717 | ENSG00000157219, | 636 | 9   | 16659 | 8.731132 | 1        | 0.65796  | 49.464   |
| brown | INTERPRO                 | IPR013091:EGF calcium-binding                              | 7   | 0.775194 | 0.056319 | ENSG00000169344, | 636 | 72  | 16659 | 2.54658  | 1        | 0.740516 | 58.7298  |
| brown | INTERPRO                 | IPR004000:Actin/actin-like                                 | 5   | 0.55371  | 0.060087 | ENSG00000163017, | 636 | 39  | 16659 | 3.358128 | 1        | 0.753341 | 61.17518 |
| brown | INTERPRO                 | IPR018453:Protease inhibitor I8, cysteine-rich trypsin inh | 3   | 0.332226 | 0.063529 | ENSG00000205592, | 636 | 11  | 16659 | 7.143654 | 1        | 0.763133 | 63.28998 |
| brown | INTERPRO                 | IPR007951:PMG                                              | 3   | 0.332226 | 0.063529 | ENSG00000206107, | 636 | 11  | 16659 | 7.143654 | 1        | 0.763133 | 63.28998 |
| brown | INTERPRO                 | IPR016186:C-type lectin-like                               | 8   | 0.885936 | 0.070594 | ENSG00000118004, | 636 | 95  | 16659 | 2.20576  | 1        | 0.790242 | 67.29816 |
| brown | INTERPRO                 | IPR008836:Semenogelin                                      | 2   | 0.221484 | 0.074784 | ENSG00000124157, | 636 | 2   | 16659 | 26.1934  | 1        | 0.800789 | 69.47835 |

|       |                 |                                                              |     |          |          |                  |     |       |       |          |          |          |          |
|-------|-----------------|--------------------------------------------------------------|-----|----------|----------|------------------|-----|-------|-------|----------|----------|----------|----------|
| brown | INTERPRO        | IPR012510:Actin-binding, Xin repeat                          | 2   | 0.221484 | 0.074784 | ENSG00000163092, | 636 | 2     | 16659 | 26.1934  | 1        | 0.800789 | 69.47835 |
| brown | INTERPRO        | IPR009126:Cholecystokinin receptor                           | 2   | 0.221484 | 0.074784 | ENSG00000110148, | 636 | 2     | 16659 | 26.1934  | 1        | 0.800789 | 69.47835 |
| brown | INTERPRO        | IPR007960:Mammalian taste receptor                           | 4   | 0.442968 | 0.074887 | ENSG00000169777, | 636 | 26    | 16659 | 4.029753 | 1        | 0.792614 | 69.53004 |
| brown | INTERPRO        | IPR018069:Whey acidic protein, 4-disulphide core, conserved  | 3   | 0.332226 | 0.085727 | ENSG00000101443, | 636 | 13    | 16659 | 6.04463  | 1        | 0.828803 | 74.54812 |
| brown | INTERPRO        | IPR017942:Lipid-binding serum glycoprotein, N-terminal       | 3   | 0.332226 | 0.085727 | ENSG00000186190, | 636 | 13    | 16659 | 6.04463  | 1        | 0.828803 | 74.54812 |
| brown | INTERPRO        | IPR001304:C-type lectin                                      | 7   | 0.775194 | 0.092603 | ENSG00000118004, | 636 | 82    | 16659 | 2.236022 | 1        | 0.845223 | 77.3191  |
| brown | INTERPRO        | IPR012351:Four-helical cytokine, core                        | 5   | 0.55371  | 0.097252 | ENSG00000162891, | 636 | 46    | 16659 | 2.847108 | 1        | 0.852874 | 79.02965 |
| brown | KEGG_PATHWAY    | hsa04740:Olfactory transduction                              | 128 | 14.17497 | 2.09E-81 | ENSG00000221931, | 255 | 379   | 5085  | 6.734751 | 2.59E-79 | 2.59E-79 | 2.41E-78 |
| brown | KEGG_PATHWAY    | hsa05332:Graft-versus-host disease                           | 8   | 0.885936 | 0.002777 | ENSG00000204287, | 255 | 39    | 5085  | 4.090498 | 0.291677 | 0.158381 | 3.16043  |
| brown | KEGG_PATHWAY    | hsa04080:Neuroactive ligand-receptor interaction             | 24  | 2.657807 | 0.004085 | ENSG00000178394, | 255 | 256   | 5085  | 1.869485 | 0.398026 | 0.155644 | 4.616497 |
| brown | KEGG_PATHWAY    | hsa05330:Allograft rejection                                 | 6   | 0.664452 | 0.031713 | ENSG00000204287, | 255 | 36    | 5085  | 3.323529 | 0.981614 | 0.631766 | 31.07414 |
| brown | KEGG_PATHWAY    | hsa05320:Autoimmune thyroid disease                          | 7   | 0.775194 | 0.040077 | ENSG00000204287, | 255 | 51    | 5085  | 2.737024 | 0.993729 | 0.637369 | 37.64421 |
| brown | KEGG_PATHWAY    | hsa04940:Type 1 diabetes mellitus                            | 6   | 0.664452 | 0.056316 | ENSG00000204287, | 255 | 42    | 5085  | 2.848739 | 0.999244 | 0.698178 | 48.79502 |
| brown | OMIM_DISEASE    | Genome-wide association and linkage analyses of hemophilia A | 4   | 0.442968 | 0.00723  | ENSG00000172464, | 102 | 15    | 3671  | 9.597386 | 0.715042 | 0.715042 | 8.496445 |
| brown | PIR_SUPERFAMILY | PIRSF000006:rhodopsin-like G protein-coupled receptors       | 168 | 18.60465 | 7.28E-76 | ENSG00000178394, | 387 | 686   | 7396  | 4.680272 | 1.65E-73 | 1.65E-73 | 9.31E-73 |
| brown | PIR_SUPERFAMILY | PIRSF003152:G protein-coupled olfactory receptor, class 1    | 121 | 13.39978 | 3.98E-70 | ENSG00000221931, | 387 | 353   | 7396  | 6.550834 | 9.00E-68 | 4.50E-68 | 5.09E-67 |
| brown | PIR_SUPERFAMILY | PIRSF001974:immunoglobulin V region                          | 13  | 1.439646 | 3.73E-07 | ENSG00000211642, | 387 | 39    | 7396  | 6.37037  | 8.44E-05 | 2.81E-05 | 4.77E-04 |
| brown | PIR_SUPERFAMILY | PIRSF038651:G protein-coupled olfactory receptor, class 2    | 13  | 1.439646 | 3.45E-05 | ENSG00000205497, | 387 | 58    | 7396  | 4.283525 | 0.00777  | 0.001948 | 0.044117 |
| brown | PIR_SUPERFAMILY | PIRSF001712:mas-related G protein-coupled receptor           | 5   | 0.55371  | 0.001193 | ENSG00000172938, | 387 | 10    | 7396  | 9.555556 | 0.236444 | 0.052524 | 1.51446  |
| brown | PIR_SUPERFAMILY | PIRSF037494:NALP protein                                     | 5   | 0.55371  | 0.002587 | ENSG00000142405, | 387 | 12    | 7396  | 7.962963 | 0.4431   | 0.092954 | 3.25713  |
| brown | PIR_SUPERFAMILY | PIRSF002282:cytoskeletal keratin                             | 10  | 1.10742  | 0.004063 | ENSG00000173908, | 387 | 61    | 7396  | 3.132969 | 0.601535 | 0.123175 | 5.071929 |
| brown | PIR_SUPERFAMILY | PIRSF005569:ultra-high-sulfur keratin                        | 4   | 0.442968 | 0.00936  | ENSG00000212721, | 387 | 9     | 7396  | 8.493827 | 0.880602 | 0.233301 | 11.32789 |
| brown | PIR_SUPERFAMILY | PIRSF001135:trypsin                                          | 7   | 0.775194 | 0.009996 | ENSG00000007038, | 387 | 36    | 7396  | 3.716049 | 0.896728 | 0.222962 | 12.05274 |
| brown | SMART           | SM00406:IGv                                                  | 22  | 2.436323 | 2.04E-15 | ENSG00000124557, | 260 | 78    | 9079  | 9.849014 | 3.02E-13 | 3.02E-13 | 2.39E-12 |
| brown | SMART           | SM00407:IGc1                                                 | 13  | 1.439646 | 3.96E-07 | ENSG00000204287, | 260 | 68    | 9079  | 6.675735 | 5.98E-05 | 2.99E-05 | 4.74E-04 |
| brown | SMART           | SM00041:CT                                                   | 5   | 0.55371  | 0.005103 | ENSG00000104415, | 260 | 25    | 9079  | 6.983846 | 0.538175 | 0.227036 | 5.933475 |
| brown | SMART           | SM00020:Tryp_SPc                                             | 10  | 1.10742  | 0.005827 | ENSG00000154646, | 260 | 116   | 9079  | 3.010279 | 0.586228 | 0.197971 | 6.748213 |
| brown | SMART           | SM00217:WAP                                                  | 4   | 0.442968 | 0.008097 | ENSG00000101443, | 260 | 15    | 9079  | 9.311795 | 0.707005 | 0.217702 | 9.262088 |
| brown | SMART           | SM00216:VWD                                                  | 4   | 0.442968 | 0.011603 | ENSG00000205592, | 260 | 17    | 9079  | 8.21629  | 0.828349 | 0.254511 | 13.02322 |
| brown | SMART           | SM00268:ACTIN                                                | 5   | 0.55371  | 0.024337 | ENSG00000163017, | 260 | 39    | 9079  | 4.476824 | 0.975775 | 0.412266 | 25.51402 |
| brown | SMART           | SM00034:CLECT                                                | 7   | 0.775194 | 0.029334 | ENSG00000118004, | 260 | 82    | 9079  | 2.98091  | 0.988843 | 0.429908 | 29.9487  |
| brown | SMART           | SM00328:BPI1                                                 | 3   | 0.332226 | 0.051408 | ENSG00000186190, | 260 | 13    | 9079  | 8.058284 | 0.999654 | 0.587482 | 46.7922  |
| brown | SMART           | SM00303:GPS                                                  | 4   | 0.442968 | 0.093331 | ENSG00000130943, | 260 | 38    | 9079  | 3.675709 | 1        | 0.77224  | 69.00548 |
| brown | SP_PIR_KEYWORDS | g-protein coupled receptor                                   | 183 | 20.26578 | 6.52E-94 | ENSG00000178394, | 707 | 816   | 19235 | 6.101459 | 2.74E-91 | 2.74E-91 | 9.15E-91 |
| brown | SP_PIR_KEYWORDS | olfaction                                                    | 135 | 14.95017 | 2.09E-91 | ENSG00000221931, | 707 | 409   | 19235 | 8.980143 | 8.79E-89 | 4.40E-89 | 2.94E-88 |
| brown | SP_PIR_KEYWORDS | transducer                                                   | 185 | 20.48726 | 1.92E-90 | ENSG00000178394, | 707 | 874   | 19235 | 5.758814 | 8.04E-88 | 2.68E-88 | 2.69E-87 |
| brown | SP_PIR_KEYWORDS | sensory transduction                                         | 148 | 16.38981 | 2.18E-81 | ENSG00000221931, | 707 | 595   | 19235 | 6.767333 | 9.16E-79 | 2.29E-79 | 3.06E-78 |
| brown | SP_PIR_KEYWORDS | disulfide bond                                               | 298 | 33.00111 | 3.58E-69 | ENSG00000173369, | 707 | 2924  | 19235 | 2.772756 | 1.50E-66 | 3.01E-67 | 5.03E-66 |
| brown | SP_PIR_KEYWORDS | receptor                                                     | 208 | 23.03433 | 2.35E-63 | ENSG00000178394, | 707 | 1583  | 19235 | 3.574828 | 9.86E-61 | 1.64E-61 | 3.30E-60 |
| brown | SP_PIR_KEYWORDS | cell membrane                                                | 220 | 24.36323 | 1.09E-46 | ENSG00000178394, | 707 | 2194  | 19235 | 2.728091 | 4.57E-44 | 6.53E-45 | 1.53E-43 |
| brown | SP_PIR_KEYWORDS | glycoprotein                                                 | 327 | 36.21262 | 5.59E-46 | ENSG00000173369, | 707 | 4318  | 19235 | 2.060335 | 2.35E-43 | 2.93E-44 | 7.85E-43 |
| brown | SP_PIR_KEYWORDS | transmembrane                                                | 297 | 32.89037 | 1.15E-21 | ENSG00000178394, | 707 | 4973  | 19235 | 1.624841 | 4.82E-19 | 5.35E-20 | 1.61E-18 |
| brown | SP_PIR_KEYWORDS | membrane                                                     | 324 | 35.8804  | 6.24E-14 | ENSG00000088827, | 707 | 6256  | 19235 | 1.409033 | 2.62E-11 | 2.62E-12 | 8.76E-11 |
| brown | SP_PIR_KEYWORDS | Secreted                                                     | 121 | 13.39978 | 9.38E-13 | ENSG00000088827, | 707 | 1689  | 19235 | 1.949075 | 3.94E-10 | 3.58E-11 | 1.32E-09 |
| brown | SP_PIR_KEYWORDS | polymorphism                                                 | 506 | 56.03544 | 6.12E-11 | ENSG00000173369, | 707 | 11550 | 19235 | 1.191904 | 2.57E-08 | 2.14E-09 | 8.59E-08 |
| brown | SP_PIR_KEYWORDS | signal                                                       | 184 | 20.37652 | 4.53E-10 | ENSG00000173369, | 707 | 3250  | 19235 | 1.540307 | 1.90E-07 | 1.46E-08 | 6.37E-07 |
| brown | SP_PIR_KEYWORDS | keratin                                                      | 25  | 2.768549 | 5.11E-10 | ENSG00000173908, | 707 | 144   | 19235 | 4.723352 | 2.15E-07 | 1.53E-08 | 7.17E-07 |
| brown | SP_PIR_KEYWORDS | defensin                                                     | 14  | 1.550388 | 9.48E-10 | ENSG00000203970, | 707 | 40    | 19235 | 9.522277 | 3.98E-07 | 2.65E-08 | 1.33E-06 |

|       |                 |                                         |     |          |          |                  |     |       |       |          |          |          |          |
|-------|-----------------|-----------------------------------------|-----|----------|----------|------------------|-----|-------|-------|----------|----------|----------|----------|
| brown | SP_PIR_KEYWORDS | antibiotic                              | 17  | 1.882614 | 2.27E-09 | ENSG00000203970, | 707 | 68    | 19235 | 6.801627 | 9.54E-07 | 5.96E-08 | 3.19E-06 |
| brown | SP_PIR_KEYWORDS | immunoglobulin c region                 | 8   | 0.885936 | 2.94E-09 | ENSG00000211669, | 707 | 9     | 19235 | 24.18356 | 1.24E-06 | 7.27E-08 | 4.13E-06 |
| brown | SP_PIR_KEYWORDS | Antimicrobial                           | 17  | 1.882614 | 4.47E-09 | ENSG00000203970, | 707 | 71    | 19235 | 6.514234 | 1.88E-06 | 1.04E-07 | 6.27E-06 |
| brown | SP_PIR_KEYWORDS | immunoglobulin                          | 11  | 1.218162 | 9.18E-08 | ENSG00000211899, | 707 | 31    | 19235 | 9.653922 | 3.86E-05 | 2.03E-06 | 1.29E-04 |
| brown | SP_PIR_KEYWORDS | heterotetramer                          | 13  | 1.439646 | 7.04E-06 | ENSG00000211899, | 707 | 69    | 19235 | 5.125864 | 0.002953 | 1.48E-04 | 0.009889 |
| brown | SP_PIR_KEYWORDS | Intermediate filament                   | 12  | 1.328904 | 1.25E-04 | ENSG00000173908, | 707 | 78    | 19235 | 4.185616 | 0.051106 | 0.002495 | 0.175294 |
| brown | SP_PIR_KEYWORDS | G protein-coupled receptor              | 14  | 1.550388 | 3.35E-04 | ENSG00000178394, | 707 | 116   | 19235 | 3.283544 | 0.131162 | 0.00637  | 0.469134 |
| brown | SP_PIR_KEYWORDS | neuropeptide                            | 7   | 0.775194 | 0.001564 | ENSG00000105954, | 707 | 35    | 19235 | 5.441301 | 0.481809 | 0.028179 | 2.174744 |
| brown | SP_PIR_KEYWORDS | transmembrane protein                   | 38  | 4.208195 | 0.004688 | ENSG00000178394, | 707 | 642   | 19235 | 1.610354 | 0.86103  | 0.078939 | 6.387332 |
| brown | SP_PIR_KEYWORDS | Pyrrrolidone carboxylic acid            | 8   | 0.885936 | 0.011249 | ENSG00000173369, | 707 | 67    | 19235 | 3.248538 | 0.991362 | 0.173093 | 14.69336 |
| brown | SP_PIR_KEYWORDS | hormone                                 | 9   | 0.996678 | 0.014514 | ENSG00000134200, | 707 | 87    | 19235 | 2.814466 | 0.997846 | 0.210356 | 18.56556 |
| brown | SP_PIR_KEYWORDS | Immunoglobulin domain                   | 28  | 3.100775 | 0.014947 | ENSG00000124557, | 707 | 470   | 19235 | 1.620813 | 0.998209 | 0.208844 | 19.06656 |
| brown | SP_PIR_KEYWORDS | zymogen                                 | 15  | 1.66113  | 0.020089 | ENSG00000137757, | 707 | 206   | 19235 | 1.981056 | 0.999801 | 0.262432 | 24.80303 |
| brown | SP_PIR_KEYWORDS | eye lens protein                        | 4   | 0.442968 | 0.022801 | ENSG00000105370, | 707 | 17    | 19235 | 6.401531 | 0.999938 | 0.283977 | 27.67448 |
| brown | SP_PIR_KEYWORDS | pyroglutamic acid                       | 6   | 0.664452 | 0.026041 | ENSG00000173369, | 707 | 46    | 19235 | 3.548675 | 0.999985 | 0.308852 | 30.97095 |
| brown | SP_PIR_KEYWORDS | Lectin                                  | 12  | 1.328904 | 0.03277  | ENSG00000118004, | 707 | 159   | 19235 | 2.053321 | 0.999999 | 0.363275 | 37.37667 |
| brown | SP_PIR_KEYWORDS | digestion                               | 3   | 0.332226 | 0.040807 | ENSG00000137392, | 707 | 9     | 19235 | 9.068835 | 1        | 0.42122  | 44.30329 |
| brown | SP_PIR_KEYWORDS | protease inhibitor                      | 9   | 0.996678 | 0.043245 | ENSG00000126838, | 707 | 107   | 19235 | 2.288398 | 1        | 0.430301 | 46.2589  |
| brown | SP_PIR_KEYWORDS | Serine protease                         | 10  | 1.10742  | 0.06323  | ENSG00000154646, | 707 | 136   | 19235 | 2.000478 | 1        | 0.553743 | 60.04897 |
| brown | SP_PIR_KEYWORDS | seminal vesicle                         | 2   | 0.221484 | 0.072063 | ENSG00000124157, | 707 | 2     | 19235 | 27.20651 | 1        | 0.592409 | 65.02696 |
| brown | SP_PIR_KEYWORDS | Serine protease inhibitor               | 7   | 0.775194 | 0.073486 | ENSG00000126838, | 707 | 80    | 19235 | 2.380569 | 1        | 0.589538 | 65.77313 |
| brown | SP_PIR_KEYWORDS | cleavage on pair of basic residues      | 16  | 1.771872 | 0.075392 | ENSG00000105954, | 707 | 271   | 19235 | 1.606288 | 1        | 0.589254 | 66.74901 |
| brown | SP_PIR_KEYWORDS | duplication                             | 14  | 1.550388 | 0.078155 | ENSG00000211899, | 707 | 228   | 19235 | 1.670575 | 1        | 0.593203 | 68.11782 |
| brown | SP_PIR_KEYWORDS | egf-like domain                         | 14  | 1.550388 | 0.082216 | ENSG00000086570, | 707 | 230   | 19235 | 1.656048 | 1        | 0.603042 | 70.03499 |
| brown | SP_PIR_KEYWORDS | carbon-carbon lyase                     | 3   | 0.332226 | 0.09149  | ENSG00000134240, | 707 | 14    | 19235 | 5.829966 | 1        | 0.634856 | 74.01889 |
| brown | SP_PIR_KEYWORDS | gpi-anchor                              | 9   | 0.996678 | 0.0926   | ENSG00000163295, | 707 | 126   | 19235 | 1.943322 | 1        | 0.630433 | 74.46157 |
| brown | UP_SEQ_FEATURE  | disulfide bond                          | 290 | 32.11517 | 5.56E-68 | ENSG00000173369, | 702 | 2819  | 19113 | 2.800881 | 1.07E-64 | 1.07E-64 | 9.51E-65 |
| brown | UP_SEQ_FEATURE  | topological domain:Extracellular        | 250 | 27.68549 | 2.48E-47 | ENSG00000178394, | 702 | 2719  | 19113 | 2.503356 | 4.78E-44 | 2.39E-44 | 4.24E-44 |
| brown | UP_SEQ_FEATURE  | glycosylation site:N-linked (GlcNAc...) | 319 | 35.32669 | 1.41E-46 | ENSG00000088827, | 702 | 4129  | 19113 | 2.103476 | 2.71E-43 | 9.04E-44 | 2.41E-43 |
| brown | UP_SEQ_FEATURE  | topological domain:Cytoplasmic          | 264 | 29.23588 | 2.08E-37 | ENSG00000178394, | 702 | 3374  | 19113 | 2.130348 | 4.01E-34 | 1.00E-34 | 3.56E-34 |
| brown | UP_SEQ_FEATURE  | transmembrane region                    | 290 | 32.11517 | 2.38E-20 | ENSG00000178394, | 702 | 4911  | 19113 | 1.607755 | 4.60E-17 | 9.19E-18 | 4.08E-17 |
| brown | UP_SEQ_FEATURE  | signal peptide                          | 184 | 20.37652 | 4.18E-10 | ENSG00000173369, | 702 | 3250  | 19113 | 1.541439 | 8.07E-07 | 1.35E-07 | 7.16E-07 |
| brown | UP_SEQ_FEATURE  | sequence variant                        | 515 | 57.03212 | 9.93E-10 | ENSG00000173369, | 702 | 11992 | 19113 | 1.16925  | 1.92E-06 | 2.74E-07 | 1.70E-06 |
| brown | UP_SEQ_FEATURE  | region of interest:Rod                  | 11  | 1.218162 | 2.53E-04 | ENSG00000173908, | 702 | 71    | 19113 | 4.218189 | 0.386054 | 0.059159 | 0.431852 |
| brown | UP_SEQ_FEATURE  | region of interest:Head                 | 11  | 1.218162 | 3.18E-04 | ENSG00000173908, | 702 | 73    | 19113 | 4.102623 | 0.459221 | 0.066024 | 0.543875 |
| brown | UP_SEQ_FEATURE  | region of interest:Tail                 | 11  | 1.218162 | 3.98E-04 | ENSG00000173908, | 702 | 75    | 19113 | 3.993219 | 0.536094 | 0.073932 | 0.679067 |
| brown | UP_SEQ_FEATURE  | region of interest:Coil 2               | 10  | 1.10742  | 5.17E-04 | ENSG00000173908, | 702 | 64    | 19113 | 4.25414  | 0.63127  | 0.086708 | 0.88118  |
| brown | UP_SEQ_FEATURE  | region of interest:Linker 12            | 10  | 1.10742  | 5.17E-04 | ENSG00000173908, | 702 | 64    | 19113 | 4.25414  | 0.63127  | 0.086708 | 0.88118  |
| brown | UP_SEQ_FEATURE  | region of interest:Coil 1B              | 10  | 1.10742  | 0.001004 | ENSG00000173908, | 702 | 70    | 19113 | 3.889499 | 0.856208 | 0.149232 | 1.705778 |
| brown | UP_SEQ_FEATURE  | region of interest:Linker 1             | 10  | 1.10742  | 0.001004 | ENSG00000173908, | 702 | 70    | 19113 | 3.889499 | 0.856208 | 0.149232 | 1.705778 |
| brown | UP_SEQ_FEATURE  | region of interest:Coil 1A              | 10  | 1.10742  | 0.001004 | ENSG00000173908, | 702 | 70    | 19113 | 3.889499 | 0.856208 | 0.149232 | 1.705778 |
| brown | UP_SEQ_FEATURE  | domain:DAPIIN                           | 6   | 0.664452 | 0.001025 | ENSG00000142405, | 702 | 22    | 19113 | 7.425408 | 0.861709 | 0.14117  | 1.739787 |
| brown | UP_SEQ_FEATURE  | repeat:3                                | 18  | 1.993355 | 0.002385 | ENSG00000134249, | 702 | 214   | 19113 | 2.290079 | 0.990029 | 0.280463 | 4.005538 |
| brown | UP_SEQ_FEATURE  | repeat:4                                | 16  | 1.771872 | 0.00296  | ENSG00000134249, | 702 | 182   | 19113 | 2.393538 | 0.996724 | 0.3171   | 4.948741 |
| brown | UP_SEQ_FEATURE  | repeat:1                                | 19  | 2.104097 | 0.003835 | ENSG00000134249, | 702 | 243   | 19113 | 2.128821 | 0.999399 | 0.370949 | 6.367815 |
| brown | UP_SEQ_FEATURE  | region of interest:CH3                  | 3   | 0.332226 | 0.003932 | ENSG00000211899, | 702 | 3     | 19113 | 27.2265  | 0.999501 | 0.360612 | 6.522567 |
| brown | UP_SEQ_FEATURE  | repeat:2                                | 19  | 2.104097 | 0.004354 | ENSG00000134249, | 702 | 246   | 19113 | 2.102859 | 0.99978  | 0.373646 | 7.198424 |
| brown | UP_SEQ_FEATURE  | repeat:8                                | 12  | 1.328904 | 0.004644 | ENSG00000168454, | 702 | 120   | 19113 | 2.72265  | 0.999874 | 0.376735 | 7.659756 |



|       |                |                                                        |       |          |          |                  |            |          |           |            |           |           |          |
|-------|----------------|--------------------------------------------------------|-------|----------|----------|------------------|------------|----------|-----------|------------|-----------|-----------|----------|
| brown | UP_SEQ_FEATURE | repeat:5                                               | 14    | 1.550388 | 0.005247 | ENSG00000168454, | 702        | 157      | 19113     | 2.42784    | 0.999961  | 0.39813   | 8.614374 |
| brown | UP_SEQ_FEATURE | region of interest:CH2                                 | 3     | 0.332226 | 0.007672 | ENSG00000211899, | 702        | 4        | 19113     | 20.41987   | 1         | 0.507291  | 12.35439 |
| brown | UP_SEQ_FEATURE | repeat:7                                               | 12    | 1.328904 | 0.007935 | ENSG00000168454, | 702        | 129      | 19113     | 2.532697   | 1         | 0.502846  | 12.75022 |
| brown | UP_SEQ_FEATURE | domain:NACHT                                           | 5     | 0.55371  | 0.010623 | ENSG00000142405, | 702        | 24       | 19113     | 5.672187   | 1         | 0.591864  | 16.71087 |
| brown | UP_SEQ_FEATURE | domain:CTCK                                            | 5     | 0.55371  | 0.012287 | ENSG00000104415, | 702        | 25       | 19113     | 5.445299   | 1         | 0.629969  | 19.07689 |
| brown | UP_SEQ_FEATURE | repeat:9                                               | 10    | 1.10742  | 0.013404 | ENSG00000168454, | 702        | 103      | 19113     | 2.643349   | 1         | 0.647181  | 20.63034 |
| brown | UP_SEQ_FEATURE | active site:Charge relay system                        | 15    | 1.66113  | 0.013509 | ENSG00000154646, | 702        | 196      | 19113     | 2.08366    | 1         | 0.635645  | 20.77473 |
| brown | UP_SEQ_FEATURE | domain:Peptidase S1                                    | 10    | 1.10742  | 0.015939 | ENSG00000154646, | 702        | 106      | 19113     | 2.568537   | 1         | 0.682895  | 24.05045 |
| brown | UP_SEQ_FEATURE | repeat:6                                               | 12    | 1.328904 | 0.016344 | ENSG00000168454, | 702        | 143      | 19113     | 2.284741   | 1         | 0.678867  | 24.58427 |
| brown | UP_SEQ_FEATURE | repeat:10                                              | 9     | 0.996678 | 0.02209  | ENSG00000168454, | 702        | 94       | 19113     | 2.606792   | 1         | 0.773868  | 31.7822  |
| brown | UP_SEQ_FEATURE | domain:Ig-like                                         | 6     | 0.664452 | 0.02384  | ENSG00000158477, | 702        | 45       | 19113     | 3.630199   | 1         | 0.788232  | 33.84172 |
| brown | UP_SEQ_FEATURE | repeat:13                                              | 8     | 0.885936 | 0.024192 | ENSG00000168454, | 702        | 78       | 19113     | 2.792461   | 1         | 0.782312  | 34.24984 |
| brown | UP_SEQ_FEATURE | region of interest:CH1                                 | 3     | 0.332226 | 0.024954 | ENSG00000211899, | 702        | 7        | 19113     | 11.6685    | 1         | 0.782184  | 35.12236 |
| brown | UP_SEQ_FEATURE | domain:C-type lectin                                   | 8     | 0.885936 | 0.025737 | ENSG00000118004, | 702        | 79       | 19113     | 2.757113   | 1         | 0.782359  | 36.0087  |
| brown | UP_SEQ_FEATURE | repeat:12                                              | 8     | 0.885936 | 0.027347 | ENSG00000168454, | 702        | 80       | 19113     | 2.72265    | 1         | 0.792774  | 37.79548 |
| brown | UP_SEQ_FEATURE | site:Stutter                                           | 5     | 0.55371  | 0.031604 | ENSG00000139648, | 702        | 33       | 19113     | 4.125227   | 1         | 0.829811  | 42.2959  |
| brown | UP_SEQ_FEATURE | repeat:15                                              | 7     | 0.775194 | 0.035941 | ENSG00000168454, | 702        | 67       | 19113     | 2.844559   | 1         | 0.859466  | 46.56472 |
| brown | UP_SEQ_FEATURE | repeat:11                                              | 8     | 0.885936 | 0.036424 | ENSG00000168454, | 702        | 85       | 19113     | 2.562494   | 1         | 0.855633  | 47.02096 |
| brown | UP_SEQ_FEATURE | propeptide:Removed in mature form                      | 15    | 1.66113  | 0.043324 | ENSG00000163017, | 702        | 229      | 19113     | 1.783395   | 1         | 0.894545  | 53.15481 |
| brown | UP_SEQ_FEATURE | lipid moiety-binding region:GPI-anchor amidated serine | 6     | 0.664452 | 0.047332 | ENSG00000169344, | 702        | 54       | 19113     | 3.025166   | 1         | 0.909244  | 56.40431 |
| brown | UP_SEQ_FEATURE | domain:VWFD 2                                          | 3     | 0.332226 | 0.049725 | ENSG00000205592, | 702        | 10       | 19113     | 8.167949   | 1         | 0.914644  | 58.24148 |
| brown | UP_SEQ_FEATURE | domain:VWFD 1                                          | 3     | 0.332226 | 0.049725 | ENSG00000205592, | 702        | 10       | 19113     | 8.167949   | 1         | 0.914644  | 58.24148 |
| brown | UP_SEQ_FEATURE | domain:VWFD 3                                          | 3     | 0.332226 | 0.049725 | ENSG00000205592, | 702        | 10       | 19113     | 8.167949   | 1         | 0.914644  | 58.24148 |
| brown | UP_SEQ_FEATURE | repeat:14                                              | 7     | 0.775194 | 0.054047 | ENSG00000168454, | 702        | 74       | 19113     | 2.575479   | 1         | 0.926868  | 61.37678 |
| brown | UP_SEQ_FEATURE | repeat:Xin 3                                           | 2     | 0.221484 | 0.07201  | ENSG00000163092, | 702        | 2        | 19113     | 27.2265    | 1         | 0.967749  | 72.18445 |
| brown | UP_SEQ_FEATURE | repeat:Xin 7                                           | 2     | 0.221484 | 0.07201  | ENSG00000163092, | 702        | 2        | 19113     | 27.2265    | 1         | 0.967749  | 72.18445 |
| brown | UP_SEQ_FEATURE | repeat:Xin 4                                           | 2     | 0.221484 | 0.07201  | ENSG00000163092, | 702        | 2        | 19113     | 27.2265    | 1         | 0.967749  | 72.18445 |
| brown | UP_SEQ_FEATURE | repeat:Xin 1                                           | 2     | 0.221484 | 0.07201  | ENSG00000163092, | 702        | 2        | 19113     | 27.2265    | 1         | 0.967749  | 72.18445 |
| brown | UP_SEQ_FEATURE | repeat:Xin 13                                          | 2     | 0.221484 | 0.07201  | ENSG00000163092, | 702        | 2        | 19113     | 27.2265    | 1         | 0.967749  | 72.18445 |
| brown | UP_SEQ_FEATURE | repeat:Xin 8                                           | 2     | 0.221484 | 0.07201  | ENSG00000163092, | 702        | 2        | 19113     | 27.2265    | 1         | 0.967749  | 72.18445 |
| brown | UP_SEQ_FEATURE | repeat:Xin 6                                           | 2     | 0.221484 | 0.07201  | ENSG00000163092, | 702        | 2        | 19113     | 27.2265    | 1         | 0.967749  | 72.18445 |
| brown | UP_SEQ_FEATURE | repeat:Xin 11                                          | 2     | 0.221484 | 0.07201  | ENSG00000163092, | 702        | 2        | 19113     | 27.2265    | 1         | 0.967749  | 72.18445 |
| brown | UP_SEQ_FEATURE | short sequence motif:Engrailed homology 1 repressor    | 2     | 0.221484 | 0.07201  | ENSG00000128610, | 702        | 2        | 19113     | 27.2265    | 1         | 0.967749  | 72.18445 |
| brown | UP_SEQ_FEATURE | repeat:Xin 16                                          | 2     | 0.221484 | 0.07201  | ENSG00000163092, | 702        | 2        | 19113     | 27.2265    | 1         | 0.967749  | 72.18445 |
| brown | UP_SEQ_FEATURE | repeat:Xin 15                                          | 2     | 0.221484 | 0.07201  | ENSG00000163092, | 702        | 2        | 19113     | 27.2265    | 1         | 0.967749  | 72.18445 |
| brown | UP_SEQ_FEATURE | repeat:Xin 5                                           | 2     | 0.221484 | 0.07201  | ENSG00000163092, | 702        | 2        | 19113     | 27.2265    | 1         | 0.967749  | 72.18445 |
| brown | UP_SEQ_FEATURE | repeat:Xin 9                                           | 2     | 0.221484 | 0.07201  | ENSG00000163092, | 702        | 2        | 19113     | 27.2265    | 1         | 0.967749  | 72.18445 |
| brown | UP_SEQ_FEATURE | region of interest:3 X 5 AA repeats of C-C-X(3)        | 2     | 0.221484 | 0.07201  | ENSG00000212900, | 702        | 2        | 19113     | 27.2265    | 1         | 0.967749  | 72.18445 |
| brown | UP_SEQ_FEATURE | repeat:Xin 2                                           | 2     | 0.221484 | 0.07201  | ENSG00000163092, | 702        | 2        | 19113     | 27.2265    | 1         | 0.967749  | 72.18445 |
| brown | UP_SEQ_FEATURE | repeat:Xin 17                                          | 2     | 0.221484 | 0.07201  | ENSG00000163092, | 702        | 2        | 19113     | 27.2265    | 1         | 0.967749  | 72.18445 |
| brown | UP_SEQ_FEATURE | repeat:Xin 12                                          | 2     | 0.221484 | 0.07201  | ENSG00000163092, | 702        | 2        | 19113     | 27.2265    | 1         | 0.967749  | 72.18445 |
| brown | UP_SEQ_FEATURE | repeat:Xin 10                                          | 2     | 0.221484 | 0.07201  | ENSG00000163092, | 702        | 2        | 19113     | 27.2265    | 1         | 0.967749  | 72.18445 |
| brown | UP_SEQ_FEATURE | repeat:Xin 14                                          | 2     | 0.221484 | 0.07201  | ENSG00000163092, | 702        | 2        | 19113     | 27.2265    | 1         | 0.967749  | 72.18445 |
| brown | UP_SEQ_FEATURE | region of interest:Pore-forming 2                      | 3     | 0.332226 | 0.080207 | ENSG00000095981, | 702        | 13       | 19113     | 6.283037   | 1         | 0.976543  | 76.10474 |
| brown | UP_SEQ_FEATURE | region of interest:Pore-forming 1                      | 3     | 0.332226 | 0.080207 | ENSG00000095981, | 702        | 13       | 19113     | 6.283037   | 1         | 0.976543  | 76.10474 |
| brown | UP_SEQ_FEATURE | domain:Ig-like 2                                       | 4     | 0.442968 | 0.088752 | ENSG00000211890, | 702        | 29       | 19113     | 3.755379   | 1         | 0.983037  | 79.63389 |
| brown | UP_SEQ_FEATURE | domain:Ig-like 1                                       | 4     | 0.442968 | 0.088752 | ENSG00000211890, | 702        | 29       | 19113     | 3.755379   | 1         | 0.983037  | 79.63389 |
| grey  | Category       | Term                                                   | Count | %        | PValue   | Genes            | List Total | Pop Hits | Pop Total | Fold Enric | Bonferron | Benjamini | FDR      |

|      |               |                                                           |     |          |          |                   |     |      |       |          |          |          |          |
|------|---------------|-----------------------------------------------------------|-----|----------|----------|-------------------|-----|------|-------|----------|----------|----------|----------|
| grey | GOTERM_BP_FAT | GO:0006811~ion transport                                  | 22  | 5.729167 | 0.002027 | ENSG00000101204,  | 187 | 768  | 13528 | 2.072304 | 0.906317 | 0.906317 | 3.215978 |
| grey | GOTERM_BP_FAT | GO:0008015~blood circulation                              | 9   | 2.34375  | 0.004201 | ENSG00000101306,  | 187 | 186  | 13528 | 3.500431 | 0.992653 | 0.914284 | 6.558129 |
| grey | GOTERM_BP_FAT | GO:0003013~circulatory system process                     | 9   | 2.34375  | 0.004201 | ENSG00000101306,  | 187 | 186  | 13528 | 3.500431 | 0.992653 | 0.914284 | 6.558129 |
| grey | GOTERM_BP_FAT | GO:0019229~regulation of vasoconstriction                 | 4   | 1.041667 | 0.011192 | ENSG00000006638,  | 187 | 34   | 13528 | 8.510852 | 0.999998 | 0.987451 | 16.58332 |
| grey | GOTERM_BP_FAT | GO:0008217~regulation of blood pressure                   | 6   | 1.5625   | 0.012257 | ENSG000000044012, | 187 | 100  | 13528 | 4.340535 | 0.999999 | 0.972623 | 18.01935 |
| grey | GOTERM_BP_FAT | GO:0015672~monovalent inorganic cation transport          | 11  | 2.864583 | 0.012613 | ENSG00000105641,  | 187 | 318  | 13528 | 2.502405 | 1        | 0.948313 | 18.49381 |
| grey | GOTERM_BP_FAT | GO:0007155~cell adhesion                                  | 18  | 4.6875   | 0.016307 | ENSG00000148600,  | 187 | 700  | 13528 | 1.860229 | 1        | 0.959147 | 23.26976 |
| grey | GOTERM_BP_FAT | GO:0022610~biological adhesion                            | 18  | 4.6875   | 0.016514 | ENSG00000148600,  | 187 | 701  | 13528 | 1.857576 | 1        | 0.937716 | 23.52955 |
| grey | GOTERM_BP_FAT | GO:0051240~positive regulation of multicellular organism  | 9   | 2.34375  | 0.019417 | ENSG00000006638,  | 187 | 244  | 13528 | 2.668362 | 1        | 0.942747 | 27.08621 |
| grey | GOTERM_BP_FAT | GO:0006941~striated muscle contraction                    | 4   | 1.041667 | 0.025194 | ENSG00000101306,  | 187 | 46   | 13528 | 6.29063  | 1        | 0.963436 | 33.70751 |
| grey | GOTERM_BP_FAT | GO:0010840~regulation of circadian sleep/wake cycle, wake | 2   | 0.520833 | 0.02731  | ENSG00000181408,  | 187 | 2    | 13528 | 72.34225 | 1        | 0.9605   | 35.9885  |
| grey | GOTERM_BP_FAT | GO:0010841~positive regulation of circadian sleep/wake    | 2   | 0.520833 | 0.02731  | ENSG00000181408,  | 187 | 2    | 13528 | 72.34225 | 1        | 0.9605   | 35.9885  |
| grey | GOTERM_BP_FAT | GO:0060048~cardiac muscle contraction                     | 3   | 0.78125  | 0.027579 | ENSG00000101306,  | 187 | 19   | 13528 | 11.42246 | 1        | 0.948542 | 36.27263 |
| grey | GOTERM_BP_FAT | GO:0042752~regulation of circadian rhythm                 | 3   | 0.78125  | 0.033269 | ENSG00000181408,  | 187 | 21   | 13528 | 10.33461 | 1        | 0.962764 | 42.02195 |
| grey | GOTERM_BP_FAT | GO:0006814~sodium ion transport                           | 6   | 1.5625   | 0.033667 | ENSG00000105641,  | 187 | 130  | 13528 | 3.338873 | 1        | 0.953779 | 42.40525 |
| grey | GOTERM_BP_FAT | GO:0007156~homophilic cell adhesion                       | 6   | 1.5625   | 0.034628 | ENSG00000148600,  | 187 | 131  | 13528 | 3.313385 | 1        | 0.947011 | 43.32105 |
| grey | GOTERM_BP_FAT | GO:0016337~cell-cell adhesion                             | 9   | 2.34375  | 0.03708  | ENSG00000148600,  | 187 | 276  | 13528 | 2.358986 | 1        | 0.947119 | 45.59669 |
| grey | GOTERM_BP_FAT | GO:0015698~inorganic anion transport                      | 5   | 1.302083 | 0.039272 | ENSG00000105641,  | 187 | 93   | 13528 | 3.889368 | 1        | 0.946183 | 47.55756 |
| grey | GOTERM_BP_FAT | GO:0045776~negative regulation of blood pressure          | 3   | 0.78125  | 0.039373 | ENSG000000044012, | 187 | 23   | 13528 | 9.435945 | 1        | 0.936551 | 47.64666 |
| grey | GOTERM_BP_FAT | GO:0060047~heart contraction                              | 3   | 0.78125  | 0.039373 | ENSG00000101306,  | 187 | 23   | 13528 | 9.435945 | 1        | 0.936551 | 47.64666 |
| grey | GOTERM_BP_FAT | GO:0003015~heart process                                  | 3   | 0.78125  | 0.039373 | ENSG00000101306,  | 187 | 23   | 13528 | 9.435945 | 1        | 0.936551 | 47.64666 |
| grey | GOTERM_BP_FAT | GO:0051048~negative regulation of secretion               | 4   | 1.041667 | 0.039838 | ENSG00000138798,  | 187 | 55   | 13528 | 5.261254 | 1        | 0.928329 | 48.05285 |
| grey | GOTERM_BP_FAT | GO:0032971~regulation of muscle filament sliding          | 2   | 0.520833 | 0.040686 | ENSG00000101306,  | 187 | 3    | 13528 | 48.22816 | 1        | 0.922016 | 48.78748 |
| grey | GOTERM_BP_FAT | GO:0050873~brown fat cell differentiation                 | 3   | 0.78125  | 0.042572 | ENSG00000181856,  | 187 | 24   | 13528 | 9.042781 | 1        | 0.921017 | 50.38582 |
| grey | GOTERM_BP_FAT | GO:0006493~protein amino acid O-linked glycosylation      | 3   | 0.78125  | 0.045865 | ENSG00000118017,  | 187 | 25   | 13528 | 8.68107  | 1        | 0.926398 | 53.06436 |
| grey | GOTERM_BP_FAT | GO:0043954~cellular component maintenance                 | 3   | 0.78125  | 0.045865 | ENSG00000148600,  | 187 | 25   | 13528 | 8.68107  | 1        | 0.926398 | 53.06436 |
| grey | GOTERM_BP_FAT | GO:0060415~muscle tissue morphogenesis                    | 3   | 0.78125  | 0.052718 | ENSG00000101306,  | 187 | 27   | 13528 | 8.038027 | 1        | 0.943464 | 58.21072 |
| grey | GOTERM_BP_FAT | GO:0055008~cardiac muscle tissue morphogenesis            | 3   | 0.78125  | 0.052718 | ENSG00000101306,  | 187 | 27   | 13528 | 8.038027 | 1        | 0.943464 | 58.21072 |
| grey | GOTERM_BP_FAT | GO:0007268~synaptic transmission                          | 9   | 2.34375  | 0.053804 | ENSG00000101204,  | 187 | 298  | 13528 | 2.184833 | 1        | 0.939563 | 58.97553 |
| grey | GOTERM_BP_FAT | GO:0060341~regulation of cellular localization            | 8   | 2.083333 | 0.055554 | ENSG00000138798,  | 187 | 248  | 13528 | 2.333621 | 1        | 0.937913 | 60.18082 |
| grey | GOTERM_BP_FAT | GO:0006936~muscle contraction                             | 6   | 1.5625   | 0.060098 | ENSG00000101306,  | 187 | 153  | 13528 | 2.836951 | 1        | 0.944602 | 63.1578  |
| grey | GOTERM_BP_FAT | GO:0051046~regulation of secretion                        | 7   | 1.822917 | 0.060401 | ENSG00000138798,  | 187 | 202  | 13528 | 2.50691  | 1        | 0.938971 | 63.34867 |
| grey | GOTERM_BP_FAT | GO:0009611~response to wounding                           | 13  | 3.385417 | 0.062177 | ENSG00000168542,  | 187 | 530  | 13528 | 1.774432 | 1        | 0.937625 | 64.44888 |
| grey | GOTERM_BP_FAT | GO:0044057~regulation of system process                   | 9   | 2.34375  | 0.063687 | ENSG00000006638,  | 187 | 309  | 13528 | 2.107056 | 1        | 0.935601 | 65.35988 |
| grey | GOTERM_BP_FAT | GO:0042753~positive regulation of circadian rhythm        | 2   | 0.520833 | 0.066891 | ENSG00000181408,  | 187 | 5    | 13528 | 28.9369  | 1        | 0.938336 | 67.22136 |
| grey | GOTERM_BP_FAT | GO:0007267~cell-cell signaling                            | 14  | 3.645833 | 0.070586 | ENSG00000101204,  | 187 | 600  | 13528 | 1.687986 | 1        | 0.942013 | 69.25112 |
| grey | GOTERM_BP_FAT | GO:0006812~cation transport                               | 13  | 3.385417 | 0.079664 | ENSG00000101204,  | 187 | 553  | 13528 | 1.700631 | 1        | 0.95607  | 73.74819 |
| grey | GOTERM_BP_FAT | GO:0042320~regulation of circadian sleep/wake cycle, RE   | 2   | 0.520833 | 0.079726 | ENSG00000181408,  | 187 | 6    | 13528 | 24.11408 | 1        | 0.951682 | 73.7767  |
| grey | GOTERM_BP_FAT | GO:0042989~sequestering of actin monomers                 | 2   | 0.520833 | 0.079726 | ENSG00000158427,  | 187 | 6    | 13528 | 24.11408 | 1        | 0.951682 | 73.7767  |
| grey | GOTERM_BP_FAT | GO:0006954~inflammatory response                          | 9   | 2.34375  | 0.079838 | ENSG00000147571,  | 187 | 325  | 13528 | 2.003324 | 1        | 0.947263 | 73.82806 |
| grey | GOTERM_BP_FAT | GO:0003012~muscle system process                          | 6   | 1.5625   | 0.082269 | ENSG00000101306,  | 187 | 168  | 13528 | 2.583652 | 1        | 0.947488 | 74.92021 |
| grey | GOTERM_BP_FAT | GO:0030036~actin cytoskeleton organization                | 7   | 1.822917 | 0.091164 | ENSG00000139132,  | 187 | 226  | 13528 | 2.240689 | 1        | 0.958715 | 78.56227 |
| grey | GOTERM_BP_FAT | GO:0060537~muscle tissue development                      | 5   | 1.302083 | 0.093739 | ENSG00000101306,  | 187 | 125  | 13528 | 2.89369  | 1        | 0.958858 | 79.52028 |
| grey | GOTERM_CC_FAT | GO:0005576~extracellular region                           | 56  | 14.58333 | 4.29E-06 | ENSG00000138798,  | 194 | 2010 | 12782 | 1.835647 | 8.19E-04 | 8.19E-04 | 0.005338 |
| grey | GOTERM_CC_FAT | GO:0005887~integral to plasma membrane                    | 33  | 8.59375  | 8.81E-04 | ENSG00000113721,  | 194 | 1188 | 12782 | 1.830183 | 0.154976 | 0.080748 | 1.090698 |
| grey | GOTERM_CC_FAT | GO:0031226~intrinsic to plasma membrane                   | 33  | 8.59375  | 0.00128  | ENSG00000113721,  | 194 | 1215 | 12782 | 1.789513 | 0.217    | 0.078305 | 1.580553 |
| grey | GOTERM_CC_FAT | GO:0034702~ion channel complex                            | 10  | 2.604167 | 0.00396  | ENSG00000101204,  | 194 | 205  | 12782 | 3.21398  | 0.531374 | 0.172617 | 4.816502 |
| grey | GOTERM_CC_FAT | GO:0031224~intrinsic to membrane                          | 102 | 26.5625  | 0.004968 | ENSG00000221932,  | 194 | 5485 | 12782 | 1.225238 | 0.613722 | 0.173239 | 6.006962 |

|      |               |                                                         |    |          |          |                  |     |      |       |          |          |          |          |
|------|---------------|---------------------------------------------------------|----|----------|----------|------------------|-----|------|-------|----------|----------|----------|----------|
| grey | GOTERM_CC_FAT | GO:0044459~plasma membrane part                         | 48 | 12.5     | 0.007164 | ENSG00000167434, | 194 | 2203 | 12782 | 1.435568 | 0.746717 | 0.204572 | 8.555382 |
| grey | GOTERM_CC_FAT | GO:0016021~integral to membrane                         | 98 | 25.52083 | 0.007816 | ENSG00000221932, | 194 | 5297 | 12782 | 1.21897  | 0.776579 | 0.192732 | 9.29946  |
| grey | GOTERM_CC_FAT | GO:0044456~synapse part                                 | 10 | 2.604167 | 0.012316 | ENSG00000101204, | 194 | 246  | 12782 | 2.678317 | 0.90624  | 0.256121 | 14.28642 |
| grey | GOTERM_CC_FAT | GO:0045202~synapse                                      | 12 | 3.125    | 0.019027 | ENSG00000101204, | 194 | 355  | 12782 | 2.227153 | 0.974504 | 0.334816 | 21.25606 |
| grey | GOTERM_CC_FAT | GO:0034706~sodium channel complex                       | 3  | 0.78125  | 0.02093  | ENSG00000007314, | 194 | 15   | 12782 | 13.17732 | 0.982402 | 0.332355 | 23.13474 |
| grey | GOTERM_CC_FAT | GO:0034703~cation channel complex                       | 6  | 1.5625   | 0.049741 | ENSG00000007314, | 194 | 132  | 12782 | 2.994845 | 0.999941 | 0.587658 | 46.98877 |
| grey | GOTERM_CC_FAT | GO:0030054~cell junction                                | 14 | 3.645833 | 0.050475 | ENSG00000101204, | 194 | 518  | 12782 | 1.780719 | 0.999949 | 0.561494 | 47.49609 |
| grey | GOTERM_CC_FAT | GO:0045211~postsynaptic membrane                        | 6  | 1.5625   | 0.053818 | ENSG00000101204, | 194 | 135  | 12782 | 2.928293 | 0.999974 | 0.556377 | 49.74949 |
| grey | GOTERM_CC_FAT | GO:0044421~extracellular region part                    | 22 | 5.729167 | 0.054855 | ENSG00000138798, | 194 | 960  | 12782 | 1.509901 | 0.999979 | 0.536842 | 50.43042 |
| grey | GOTERM_CC_FAT | GO:0030141~secretory granule                            | 7  | 1.822917 | 0.055152 | ENSG00000138798, | 194 | 180  | 12782 | 2.562257 | 0.99998  | 0.514406 | 50.62408 |
| grey | GOTERM_CC_FAT | GO:0030017~sarcomere                                    | 5  | 1.302083 | 0.060981 | ENSG00000101306, | 194 | 98   | 12782 | 3.361561 | 0.999994 | 0.528155 | 54.28231 |
| grey | GOTERM_CC_FAT | GO:0005886~plasma membrane                              | 68 | 17.70833 | 0.067648 | ENSG00000138798, | 194 | 3777 | 12782 | 1.186203 | 0.999998 | 0.54478  | 58.15995 |
| grey | GOTERM_CC_FAT | GO:0030016~myofibril                                    | 5  | 1.302083 | 0.087298 | ENSG00000101306, | 194 | 111  | 12782 | 2.967865 | 1        | 0.620644 | 67.89915 |
| grey | GOTERM_CC_FAT | GO:0044449~contractile fiber part                       | 5  | 1.302083 | 0.091767 | ENSG00000101306, | 194 | 113  | 12782 | 2.915336 | 1        | 0.620009 | 69.80055 |
| grey | GOTERM_CC_FAT | GO:0005615~extracellular space                          | 16 | 4.166667 | 0.094943 | ENSG00000138798, | 194 | 685  | 12782 | 1.538957 | 1        | 0.614296 | 71.08843 |
| grey | GOTERM_MF_FAT | GO:0005216~ion channel activity                         | 15 | 3.90625  | 0.002296 | ENSG00000101204, | 198 | 386  | 12983 | 2.548084 | 0.60309  | 0.60309  | 3.157535 |
| grey | GOTERM_MF_FAT | GO:0022836~gated channel activity                       | 13 | 3.385417 | 0.002762 | ENSG00000101204, | 198 | 310  | 12983 | 2.749739 | 0.671037 | 0.426447 | 3.786847 |
| grey | GOTERM_MF_FAT | GO:0022838~substrate specific channel activity          | 15 | 3.90625  | 0.00303  | ENSG00000101204, | 198 | 398  | 12983 | 2.471258 | 0.704769 | 0.334133 | 4.147585 |
| grey | GOTERM_MF_FAT | GO:0015276~ligand-gated ion channel activity            | 8  | 2.083333 | 0.003214 | ENSG00000101204, | 198 | 127  | 12983 | 4.130438 | 0.725876 | 0.27642  | 4.394146 |
| grey | GOTERM_MF_FAT | GO:0022834~ligand-gated channel activity                | 8  | 2.083333 | 0.003214 | ENSG00000101204, | 198 | 127  | 12983 | 4.130438 | 0.725876 | 0.27642  | 4.394146 |
| grey | GOTERM_MF_FAT | GO:0015267~channel activity                             | 15 | 3.90625  | 0.004118 | ENSG00000101204, | 198 | 412  | 12983 | 2.387283 | 0.80961  | 0.282323 | 5.596533 |
| grey | GOTERM_MF_FAT | GO:0022803~passive transmembrane transporter activity   | 15 | 3.90625  | 0.004206 | ENSG00000101204, | 198 | 413  | 12983 | 2.381503 | 0.81631  | 0.246041 | 5.713902 |
| grey | GOTERM_MF_FAT | GO:0030414~peptidase inhibitor activity                 | 8  | 2.083333 | 0.008784 | ENSG00000164530, | 198 | 153  | 12983 | 3.428534 | 0.971185 | 0.397515 | 11.58719 |
| grey | GOTERM_MF_FAT | GO:0005261~cation channel activity                      | 11 | 2.864583 | 0.009289 | ENSG00000101204, | 198 | 275  | 12983 | 2.622828 | 0.976517 | 0.374332 | 12.21314 |
| grey | GOTERM_MF_FAT | GO:0005272~sodium channel activity                      | 4  | 1.041667 | 0.01235  | ENSG00000007314, | 198 | 32   | 12983 | 8.196338 | 0.993232 | 0.425964 | 15.92454 |
| grey | GOTERM_MF_FAT | GO:0004867~serine-type endopeptidase inhibitor activity | 6  | 1.5625   | 0.012976 | ENSG00000215018, | 198 | 92   | 12983 | 4.27635  | 0.994754 | 0.408464 | 16.66494 |
| grey | GOTERM_MF_FAT | GO:0005248~voltage-gated sodium channel activity        | 3  | 0.78125  | 0.021124 | ENSG00000007314, | 198 | 15   | 12983 | 13.11414 | 0.999813 | 0.54172  | 25.77123 |
| grey | GOTERM_MF_FAT | GO:0031420~alkali metal ion binding                     | 9  | 2.34375  | 0.023089 | ENSG00000105641, | 198 | 228  | 12983 | 2.588317 | 0.999917 | 0.542767 | 27.82409 |
| grey | GOTERM_MF_FAT | GO:0004866~endopeptidase inhibitor activity             | 7  | 1.822917 | 0.023179 | ENSG00000215018, | 198 | 145  | 12983 | 3.165482 | 0.99992  | 0.51578  | 27.9169  |
| grey | GOTERM_MF_FAT | GO:0046873~metal ion transmembrane transporter activ    | 11 | 2.864583 | 0.028136 | ENSG00000101204, | 198 | 328  | 12983 | 2.199018 | 0.99999  | 0.559348 | 32.85825 |
| grey | GOTERM_MF_FAT | GO:0031404~chloride ion binding                         | 5  | 1.302083 | 0.029494 | ENSG00000141540, | 198 | 77   | 12983 | 4.257838 | 0.999994 | 0.551716 | 34.15551 |
| grey | GOTERM_MF_FAT | GO:0015111~iodide transmembrane transporter activity    | 2  | 0.520833 | 0.030118 | ENSG00000105641, | 198 | 2    | 12983 | 65.57071 | 0.999995 | 0.536223 | 34.74434 |
| grey | GOTERM_MF_FAT | GO:0031402~sodium ion binding                           | 6  | 1.5625   | 0.032767 | ENSG00000105641, | 198 | 117  | 12983 | 3.3626   | 0.999998 | 0.545164 | 37.18814 |
| grey | GOTERM_MF_FAT | GO:0005328~neurotransmitter:sodium symporter activity   | 3  | 0.78125  | 0.036383 | ENSG00000111181, | 198 | 20   | 12983 | 9.835606 | 1        | 0.562948 | 40.38777 |
| grey | GOTERM_MF_FAT | GO:0015370~solute:sodium symporter activity             | 4  | 1.041667 | 0.044202 | ENSG00000111181, | 198 | 52   | 12983 | 5.043901 | 1        | 0.615776 | 46.79604 |
| grey | GOTERM_MF_FAT | GO:0005326~neurotransmitter transporter activity        | 3  | 0.78125  | 0.050815 | ENSG00000111181, | 198 | 24   | 12983 | 8.196338 | 1        | 0.649448 | 51.70975 |
| grey | GOTERM_MF_FAT | GO:0043168~anion binding                                | 5  | 1.302083 | 0.051257 | ENSG00000141540, | 198 | 92   | 12983 | 3.563625 | 1        | 0.634779 | 52.02298 |
| grey | GOTERM_MF_FAT | GO:0004857~enzyme inhibitor activity                    | 9  | 2.34375  | 0.054218 | ENSG00000164530, | 198 | 270  | 12983 | 2.18569  | 1        | 0.638891 | 54.0708  |
| grey | GOTERM_MF_FAT | GO:0008144~drug binding                                 | 4  | 1.041667 | 0.055435 | ENSG00000068976, | 198 | 57   | 12983 | 4.601453 | 1        | 0.630944 | 54.88942 |
| grey | GOTERM_MF_FAT | GO:0030594~neurotransmitter receptor activity           | 5  | 1.302083 | 0.056432 | ENSG00000101204, | 198 | 95   | 12983 | 3.45109  | 1        | 0.622038 | 55.54947 |
| grey | GOTERM_MF_FAT | GO:0042165~neurotransmitter binding                     | 5  | 1.302083 | 0.071548 | ENSG00000101204, | 198 | 103  | 12983 | 3.183044 | 1        | 0.696909 | 64.52018 |
| grey | GOTERM_MF_FAT | GO:0022843~voltage-gated cation channel activity        | 6  | 1.5625   | 0.07322  | ENSG00000007314, | 198 | 147  | 12983 | 2.676355 | 1        | 0.691391 | 65.40171 |
| grey | GOTERM_MF_FAT | GO:0005230~extracellular ligand-gated ion channel activ | 4  | 1.041667 | 0.096168 | ENSG00000101204, | 198 | 72   | 12983 | 3.642817 | 1        | 0.778082 | 75.61838 |
| grey | INTERPRO      | IPR003599:Immunoglobulin subtype                        | 14 | 3.645833 | 0.002263 | ENSG00000132185, | 263 | 330  | 16659 | 2.687245 | 0.653698 | 0.653698 | 3.180957 |
| grey | INTERPRO      | IPR007110:Immunoglobulin-like                           | 17 | 4.427083 | 0.005863 | ENSG00000132185, | 263 | 501  | 16659 | 2.149336 | 0.936202 | 0.747417 | 8.046988 |
| grey | INTERPRO      | IPR008160:Collagen triple helix repeat                  | 6  | 1.5625   | 0.010434 | ENSG00000168542, | 263 | 84   | 16659 | 4.524443 | 0.992617 | 0.80528  | 13.89756 |
| grey | INTERPRO      | IPR001073:Complement C1q protein                        | 4  | 1.041667 | 0.013626 | ENSG00000102924, | 263 | 32   | 16659 | 7.917776 | 0.998372 | 0.799146 | 17.7764  |
| grey | INTERPRO      | IPR013783:Immunoglobulin-like fold                      | 17 | 4.427083 | 0.014322 | ENSG00000132185, | 263 | 553  | 16659 | 1.947229 | 0.998831 | 0.740825 | 18.60076 |

|      |                 |                                                           |     |          |          |                 |     |      |       |          |          |          |          |
|------|-----------------|-----------------------------------------------------------|-----|----------|----------|-----------------|-----|------|-------|----------|----------|----------|----------|
| grey | INTERPRO        | IPR013098:Immunoglobulin I-set                            | 7   | 1.822917 | 0.021983 | ENSG00000080854 | 263 | 138  | 16659 | 3.21301  | 0.99997  | 0.823384 | 27.17517 |
| grey | INTERPRO        | IPR001909:Krueppel-associated box                         | 12  | 3.125    | 0.025413 | ENSG00000186300 | 263 | 355  | 16659 | 2.141145 | 0.999994 | 0.821111 | 30.73537 |
| grey | INTERPRO        | IPR008983:Tumour necrosis factor-like                     | 4   | 1.041667 | 0.033608 | ENSG00000102924 | 263 | 45   | 16659 | 5.630418 | 1        | 0.864646 | 38.59685 |
| grey | INTERPRO        | IPR002350:Proteinase inhibitor I1, Kazal                  | 4   | 1.041667 | 0.035547 | ENSG00000152583 | 263 | 46   | 16659 | 5.508018 | 1        | 0.847732 | 40.33153 |
| grey | INTERPRO        | IPR000175:Sodium:neurotransmitter symporter               | 3   | 0.78125  | 0.038864 | ENSG00000111181 | 263 | 20   | 16659 | 9.501331 | 1        | 0.843567 | 43.19321 |
| grey | INTERPRO        | IPR013151:Immunoglobulin                                  | 8   | 2.083333 | 0.041295 | ENSG00000132185 | 263 | 202  | 16659 | 2.508602 | 1        | 0.833742 | 45.20881 |
| grey | INTERPRO        | IPR003598:Immunoglobulin subtype 2                        | 8   | 2.083333 | 0.043687 | ENSG00000221932 | 263 | 205  | 16659 | 2.471891 | 1        | 0.824855 | 47.12753 |
| grey | INTERPRO        | IPR002172:Low density lipoprotein-receptor, class A, cyst | 4   | 1.041667 | 0.043866 | ENSG00000203985 | 263 | 50   | 16659 | 5.067376 | 1        | 0.801083 | 47.26844 |
| grey | INTERPRO        | IPR006643:ZASP                                            | 2   | 0.520833 | 0.046446 | ENSG00000154553 | 263 | 3    | 16659 | 42.22814 | 1        | 0.796043 | 49.26255 |
| grey | INTERPRO        | IPR002345:Lipocalin                                       | 3   | 0.78125  | 0.058317 | ENSG00000122133 | 263 | 25   | 16659 | 7.601065 | 1        | 0.846598 | 57.56597 |
| grey | INTERPRO        | IPR013087:Zinc finger, C2H2-type/integrase, DNA-binding   | 16  | 4.166667 | 0.066528 | ENSG00000197013 | 263 | 621  | 16659 | 1.632005 | 1        | 0.866504 | 62.54981 |
| grey | INTERPRO        | IPR016323:Thymosin beta-4, chordata                       | 2   | 0.520833 | 0.07621  | ENSG00000158427 | 263 | 5    | 16659 | 25.33688 | 1        | 0.887215 | 67.72611 |
| grey | INTERPRO        | IPR001152:Thymosin beta-4                                 | 2   | 0.520833 | 0.07621  | ENSG00000158427 | 263 | 5    | 16659 | 25.33688 | 1        | 0.887215 | 67.72611 |
| grey | INTERPRO        | IPR000566:Lipocalin-related protein and Bos/Can/Equ alle  | 3   | 0.78125  | 0.089834 | ENSG00000122133 | 263 | 32   | 16659 | 5.938332 | 1        | 0.913475 | 73.89051 |
| grey | INTERPRO        | IPR002126:Cadherin                                        | 5   | 1.302083 | 0.090786 | ENSG00000148600 | 263 | 108  | 16659 | 2.99251  | 1        | 0.904086 | 74.27748 |
| grey | INTERPRO        | IPR012674:Calycin                                         | 3   | 0.78125  | 0.094673 | ENSG00000122133 | 263 | 33   | 16659 | 5.758382 | 1        | 0.902446 | 75.80283 |
| grey | INTERPRO        | IPR013106:Immunoglobulin V-set                            | 8   | 2.083333 | 0.098878 | ENSG00000158887 | 263 | 249  | 16659 | 2.035091 | 1        | 0.901754 | 77.35776 |
| grey | KEGG_PATHWAY    | hsa04060:Cytokine-cytokine receptor interaction           | 9   | 2.34375  | 0.009089 | ENSG00000138798 | 59  | 262  | 5085  | 2.960603 | 0.535597 | 0.535597 | 9.336065 |
| grey | KEGG_PATHWAY    | hsa04020:Calcium signaling pathway                        | 7   | 1.822917 | 0.014379 | ENSG00000006638 | 59  | 176  | 5085  | 3.42787  | 0.703776 | 0.455736 | 14.39847 |
| grey | KEGG_PATHWAY    | hsa04080:Neuroactive ligand-receptor interaction          | 7   | 1.822917 | 0.069794 | ENSG00000006638 | 59  | 256  | 5085  | 2.35666  | 0.997706 | 0.868107 | 54.00242 |
| grey | KEGG_PATHWAY    | hsa00500:Starch and sucrose metabolism                    | 3   | 0.78125  | 0.082368 | ENSG00000068976 | 59  | 42   | 5085  | 6.156174 | 0.999269 | 0.835548 | 60.25433 |
| grey | PIR_SUPERFAMILY | PIRSF005559:zinc finger protein ZFP-36                    | 8   | 2.083333 | 0.006143 | ENSG00000186300 | 119 | 137  | 7396  | 3.629271 | 0.539946 | 0.539946 | 6.887331 |
| grey | PIR_SUPERFAMILY | PIRSF002444:gamma-aminobutyric acid transporter           | 3   | 0.78125  | 0.029361 | ENSG00000111181 | 119 | 17   | 7396  | 10.96787 | 0.976597 | 0.847021 | 29.18602 |
| grey | PIR_SUPERFAMILY | PIRSF500452:beta crystallin B                             | 2   | 0.520833 | 0.04711  | ENSG00000100053 | 119 | 3    | 7396  | 41.43417 | 0.997712 | 0.868238 | 42.81271 |
| grey | PIR_SUPERFAMILY | PIRSF001828:Thymosin_beta                                 | 2   | 0.520833 | 0.077288 | ENSG00000158427 | 119 | 5    | 7396  | 24.8605  | 0.99996  | 0.920643 | 60.60474 |
| grey | PIR_SUPERFAMILY | PIRSF001630:serpin                                        | 3   | 0.78125  | 0.096803 | ENSG00000197249 | 119 | 33   | 7396  | 5.650115 | 0.999997 | 0.923136 | 69.24373 |
| grey | SMART           | SM00409:IG                                                | 14  | 3.645833 | 0.005195 | ENSG00000132185 | 160 | 330  | 9079  | 2.407311 | 0.450622 | 0.450622 | 5.760248 |
| grey | SMART           | SM00110:C1Q                                               | 4   | 1.041667 | 0.018027 | ENSG00000102924 | 160 | 32   | 9079  | 7.092969 | 0.876557 | 0.648655 | 18.71519 |
| grey | SMART           | SM00280:KAZAL                                             | 4   | 1.041667 | 0.046256 | ENSG00000152583 | 160 | 46   | 9079  | 4.934239 | 0.995688 | 0.837235 | 41.69388 |
| grey | SMART           | SM00349:KRAB                                              | 12  | 3.125    | 0.047168 | ENSG00000186300 | 160 | 355  | 9079  | 1.918099 | 0.996137 | 0.750699 | 42.32592 |
| grey | SMART           | SM00735:ZM                                                | 2   | 0.520833 | 0.05163  | ENSG00000154553 | 160 | 3    | 9079  | 37.82917 | 0.997749 | 0.704544 | 45.3286  |
| grey | SMART           | SM00192:LDLa                                              | 4   | 1.041667 | 0.056815 | ENSG00000203985 | 160 | 50   | 9079  | 4.5395   | 0.998801 | 0.674082 | 48.6384  |
| grey | SMART           | SM00408:IGc2                                              | 8   | 2.083333 | 0.068467 | ENSG00000221932 | 160 | 205  | 9079  | 2.21439  | 0.999713 | 0.688133 | 55.41983 |
| grey | SMART           | SM00152:THY                                               | 2   | 0.520833 | 0.084569 | ENSG00000158427 | 160 | 5    | 9079  | 22.6975  | 0.999961 | 0.719218 | 63.4502  |
| grey | SP_PIR_KEYWORDS | signal                                                    | 89  | 23.17708 | 4.39E-08 | ENSG00000122133 | 300 | 3250 | 19235 | 1.75581  | 1.34E-05 | 1.34E-05 | 5.88E-05 |
| grey | SP_PIR_KEYWORDS | disulfide bond                                            | 76  | 19.79167 | 5.08E-06 | ENSG00000122133 | 300 | 2924 | 19235 | 1.666507 | 0.001554 | 7.77E-04 | 0.006812 |
| grey | SP_PIR_KEYWORDS | glycoprotein                                              | 100 | 26.04167 | 1.33E-05 | ENSG00000122133 | 300 | 4318 | 19235 | 1.48487  | 0.004066 | 0.001357 | 0.017844 |
| grey | SP_PIR_KEYWORDS | Secreted                                                  | 47  | 12.23958 | 1.28E-04 | ENSG00000173467 | 300 | 1689 | 19235 | 1.784182 | 0.038496 | 0.009766 | 0.171805 |
| grey | SP_PIR_KEYWORDS | Immunoglobulin domain                                     | 17  | 4.427083 | 0.002924 | ENSG00000132185 | 300 | 470  | 19235 | 2.319113 | 0.591848 | 0.164081 | 3.849117 |
| grey | SP_PIR_KEYWORDS | ionic channel                                             | 13  | 3.385417 | 0.004289 | ENSG00000101204 | 300 | 318  | 19235 | 2.621122 | 0.731595 | 0.196847 | 5.598268 |
| grey | SP_PIR_KEYWORDS | cell adhesion                                             | 15  | 3.90625  | 0.006591 | ENSG00000148600 | 300 | 422  | 19235 | 2.279028 | 0.867806 | 0.251039 | 8.481791 |
| grey | SP_PIR_KEYWORDS | ion transport                                             | 18  | 4.6875   | 0.009278 | ENSG00000101204 | 300 | 578  | 19235 | 1.996713 | 0.942288 | 0.299903 | 11.74462 |
| grey | SP_PIR_KEYWORDS | sodium channel                                            | 4   | 1.041667 | 0.010077 | ENSG00000007314 | 300 | 29   | 19235 | 8.843678 | 0.95492  | 0.291332 | 12.69441 |
| grey | SP_PIR_KEYWORDS | collagen                                                  | 6   | 1.5625   | 0.016342 | ENSG00000168542 | 300 | 95   | 19235 | 4.049474 | 0.99354  | 0.396015 | 19.81645 |
| grey | SP_PIR_KEYWORDS | transmembrane                                             | 95  | 24.73958 | 0.016898 | ENSG00000138798 | 300 | 4973 | 19235 | 1.224831 | 0.994566 | 0.37755  | 20.42161 |
| grey | SP_PIR_KEYWORDS | neurotransmitter transport                                | 4   | 1.041667 | 0.019569 | ENSG00000111181 | 300 | 37   | 19235 | 6.931532 | 0.997637 | 0.395872 | 23.27155 |
| grey | SP_PIR_KEYWORDS | cell junction                                             | 13  | 3.385417 | 0.02292  | ENSG00000101204 | 300 | 399  | 19235 | 2.089014 | 0.999171 | 0.42061  | 26.71251 |
| grey | SP_PIR_KEYWORDS | protease inhibitor                                        | 6   | 1.5625   | 0.025852 | ENSG00000164530 | 300 | 107  | 19235 | 3.595327 | 0.999669 | 0.435877 | 29.60593 |

|      |                 |                                                        |    |          |          |                  |     |      |       |          |          |          |          |
|------|-----------------|--------------------------------------------------------|----|----------|----------|------------------|-----|------|-------|----------|----------|----------|----------|
| grey | SP_PIR_KEYWORDS | chloride                                               | 5  | 1.302083 | 0.029412 | ENSG00000141540, | 300 | 75   | 19235 | 4.274444 | 0.999892 | 0.456112 | 32.97723 |
| grey | SP_PIR_KEYWORDS | Sodium                                                 | 6  | 1.5625   | 0.034916 | ENSG00000105641, | 300 | 116  | 19235 | 3.316379 | 0.999981 | 0.493237 | 37.89618 |
| grey | SP_PIR_KEYWORDS | Sodium transport                                       | 6  | 1.5625   | 0.034916 | ENSG00000105641, | 300 | 116  | 19235 | 3.316379 | 0.999981 | 0.493237 | 37.89618 |
| grey | SP_PIR_KEYWORDS | Serine protease inhibitor                              | 5  | 1.302083 | 0.036067 | ENSG00000215018, | 300 | 80   | 19235 | 4.007292 | 0.999987 | 0.483773 | 38.88158 |
| grey | SP_PIR_KEYWORDS | Cardiomyopathy                                         | 4  | 1.041667 | 0.038489 | ENSG00000101306, | 300 | 48   | 19235 | 5.343056 | 0.999994 | 0.486873 | 40.90758 |
| grey | SP_PIR_KEYWORDS | synapse                                                | 8  | 2.083333 | 0.049308 | ENSG00000101204, | 300 | 213  | 19235 | 2.408138 | 1        | 0.557078 | 49.22366 |
| grey | SP_PIR_KEYWORDS | glycosyltransferase                                    | 8  | 2.083333 | 0.050598 | ENSG00000068976, | 300 | 214  | 19235 | 2.396885 | 1        | 0.548161 | 50.1399  |
| grey | SP_PIR_KEYWORDS | Signal-anchor                                          | 12 | 3.125    | 0.065267 | ENSG00000153976, | 300 | 421  | 19235 | 1.827553 | 1        | 0.625996 | 59.53173 |
| grey | SP_PIR_KEYWORDS | transmembrane protein                                  | 16 | 4.166667 | 0.077346 | ENSG00000138798, | 300 | 642  | 19235 | 1.597923 | 1        | 0.673621 | 66.00596 |
| grey | SP_PIR_KEYWORDS | disease mutation                                       | 33 | 8.59375  | 0.080286 | ENSG00000138798, | 300 | 1591 | 19235 | 1.329887 | 1        | 0.671586 | 67.42965 |
| grey | SP_PIR_KEYWORDS | transport                                              | 34 | 8.854167 | 0.092125 | ENSG00000187848, | 300 | 1670 | 19235 | 1.305369 | 1        | 0.708371 | 72.62173 |
| grey | SP_PIR_KEYWORDS | postsynaptic cell membrane                             | 5  | 1.302083 | 0.092585 | ENSG00000101204, | 300 | 110  | 19235 | 2.914394 | 1        | 0.695528 | 72.80678 |
| grey | SP_PIR_KEYWORDS | Symport                                                | 5  | 1.302083 | 0.094937 | ENSG00000111181, | 300 | 111  | 19235 | 2.888138 | 1        | 0.690867 | 73.73646 |
| grey | UP_SEQ_FEATURE  | signal peptide                                         | 89 | 23.17708 | 5.90E-08 | ENSG00000122133, | 300 | 3250 | 19113 | 1.744674 | 5.38E-05 | 5.38E-05 | 9.22E-05 |
| grey | UP_SEQ_FEATURE  | disulfide bond                                         | 75 | 19.53125 | 3.25E-06 | ENSG00000122133, | 300 | 2819 | 19113 | 1.695016 | 0.002962 | 0.001482 | 0.005078 |
| grey | UP_SEQ_FEATURE  | glycosylation site:N-linked (GlcNAc...)                | 95 | 24.73958 | 4.30E-05 | ENSG00000122133, | 300 | 4129 | 19113 | 1.465839 | 0.038451 | 0.012985 | 0.067108 |
| grey | UP_SEQ_FEATURE  | zinc finger region:C2H2-type 1; degenerate             | 10 | 2.604167 | 1.29E-04 | ENSG00000186300, | 300 | 122  | 19113 | 5.222131 | 0.111399 | 0.029095 | 0.202005 |
| grey | UP_SEQ_FEATURE  | topological domain:Extracellular                       | 67 | 17.44792 | 1.48E-04 | ENSG00000138798, | 300 | 2719 | 19113 | 1.569904 | 0.125978 | 0.02657  | 0.230265 |
| grey | UP_SEQ_FEATURE  | zinc finger region:C2H2-type 12                        | 13 | 3.385417 | 6.46E-04 | ENSG00000186300, | 300 | 252  | 19113 | 3.286627 | 0.445436 | 0.093589 | 1.004318 |
| grey | UP_SEQ_FEATURE  | topological domain:Cytoplasmic                         | 74 | 19.27083 | 0.001836 | ENSG00000138798, | 300 | 3374 | 19113 | 1.397315 | 0.812922 | 0.212948 | 2.82905  |
| grey | UP_SEQ_FEATURE  | zinc finger region:C2H2-type 11                        | 13 | 3.385417 | 0.002323 | ENSG00000186300, | 300 | 293  | 19113 | 2.826724 | 0.880079 | 0.232883 | 3.566052 |
| grey | UP_SEQ_FEATURE  | domain:Kazal-like                                      | 5  | 1.302083 | 0.003444 | ENSG00000152583, | 300 | 40   | 19113 | 7.96375  | 0.956989 | 0.295022 | 5.244189 |
| grey | UP_SEQ_FEATURE  | domain:KRAB                                            | 13 | 3.385417 | 0.006312 | ENSG00000152454, | 300 | 332  | 19113 | 2.494669 | 0.996894 | 0.438667 | 9.413268 |
| grey | UP_SEQ_FEATURE  | zinc finger region:C2H2-type 9                         | 14 | 3.645833 | 0.006616 | ENSG00000186300, | 300 | 376  | 19113 | 2.372181 | 0.997651 | 0.42324  | 9.845276 |
| grey | UP_SEQ_FEATURE  | zinc finger region:C2H2-type 14                        | 8  | 2.083333 | 0.011916 | ENSG00000152454, | 300 | 157  | 19113 | 3.246369 | 0.999982 | 0.5979   | 17.07021 |
| grey | UP_SEQ_FEATURE  | domain:C1q                                             | 4  | 1.041667 | 0.012326 | ENSG00000102924, | 300 | 31   | 19113 | 8.220645 | 0.999988 | 0.581094 | 17.60622 |
| grey | UP_SEQ_FEATURE  | transmembrane region                                   | 95 | 24.73958 | 0.014351 | ENSG00000138798, | 300 | 4911 | 19113 | 1.232427 | 0.999998 | 0.610004 | 20.20406 |
| grey | UP_SEQ_FEATURE  | zinc finger region:C2H2-type 10                        | 12 | 3.125    | 0.016465 | ENSG00000152454, | 300 | 334  | 19113 | 2.288982 | 1        | 0.635567 | 22.83536 |
| grey | UP_SEQ_FEATURE  | zinc finger region:C2H2-type 15                        | 7  | 1.822917 | 0.018943 | ENSG00000152454, | 300 | 134  | 19113 | 3.328134 | 1        | 0.663821 | 25.81567 |
| grey | UP_SEQ_FEATURE  | zinc finger region:C2H2-type 7                         | 14 | 3.645833 | 0.025931 | ENSG00000197013, | 300 | 451  | 19113 | 1.977694 | 1        | 0.755726 | 33.6502  |
| grey | UP_SEQ_FEATURE  | zinc finger region:C2H2-type 8                         | 13 | 3.385417 | 0.031869 | ENSG00000197013, | 300 | 417  | 19113 | 1.986163 | 1        | 0.806211 | 39.69223 |
| grey | UP_SEQ_FEATURE  | site:Reactive bond                                     | 4  | 1.041667 | 0.033186 | ENSG00000178172, | 300 | 45   | 19113 | 5.663111 | 1        | 0.802096 | 40.96086 |
| grey | UP_SEQ_FEATURE  | zinc finger region:C2H2-type 13                        | 8  | 2.083333 | 0.039169 | ENSG00000152454, | 300 | 201  | 19113 | 2.535721 | 1        | 0.838306 | 46.41489 |
| grey | UP_SEQ_FEATURE  | zinc finger region:C2H2-type 6                         | 14 | 3.645833 | 0.044254 | ENSG00000197013, | 300 | 488  | 19113 | 1.827746 | 1        | 0.859941 | 50.67489 |
| grey | UP_SEQ_FEATURE  | region of interest:C-terminal arm                      | 2  | 0.520833 | 0.046203 | ENSG00000100053, | 300 | 3    | 19113 | 42.47333 | 1        | 0.859283 | 52.223   |
| grey | UP_SEQ_FEATURE  | domain:Fibronectin type-III                            | 4  | 1.041667 | 0.064966 | ENSG00000177363, | 300 | 59   | 19113 | 4.319322 | 1        | 0.930299 | 64.96572 |
| grey | UP_SEQ_FEATURE  | domain:LDL-receptor class A 1                          | 3  | 0.78125  | 0.066259 | ENSG00000203985, | 300 | 27   | 19113 | 7.078889 | 1        | 0.926108 | 65.71462 |
| grey | UP_SEQ_FEATURE  | zinc finger region:C2H2-type 8; degenerate             | 2  | 0.520833 | 0.075817 | ENSG00000198039, | 300 | 5    | 19113 | 25.484   | 1        | 0.943656 | 70.80311 |
| grey | UP_SEQ_FEATURE  | zinc finger region:C2H2-type 16                        | 5  | 1.302083 | 0.078326 | ENSG00000105750, | 300 | 103  | 19113 | 3.092718 | 1        | 0.942789 | 72.01647 |
| grey | UP_SEQ_FEATURE  | domain:Ig-like C2-type                                 | 5  | 1.302083 | 0.078326 | ENSG00000221932, | 300 | 103  | 19113 | 3.092718 | 1        | 0.942789 | 72.01647 |
| grey | UP_SEQ_FEATURE  | zinc finger region:C2H2-type 5                         | 14 | 3.645833 | 0.080231 | ENSG00000197013, | 300 | 538  | 19113 | 1.657881 | 1        | 0.940687 | 72.9058  |
| grey | UP_SEQ_FEATURE  | domain:Cadherin 1                                      | 5  | 1.302083 | 0.082721 | ENSG00000148600, | 300 | 105  | 19113 | 3.03381  | 1        | 0.939935 | 74.02875 |
| grey | UP_SEQ_FEATURE  | domain:Cadherin 2                                      | 5  | 1.302083 | 0.082721 | ENSG00000148600, | 300 | 105  | 19113 | 3.03381  | 1        | 0.939935 | 74.02875 |
| grey | UP_SEQ_FEATURE  | zinc finger region:C2H2-type 18                        | 4  | 1.041667 | 0.084595 | ENSG00000197013, | 300 | 66   | 19113 | 3.861212 | 1        | 0.937941 | 74.84505 |
| grey | UP_SEQ_FEATURE  | domain:MAGE                                            | 3  | 0.78125  | 0.089045 | ENSG00000221867, | 300 | 32   | 19113 | 5.972813 | 1        | 0.94129  | 76.68793 |
| grey | UP_SEQ_FEATURE  | domain:Collagen-like 6                                 | 2  | 0.520833 | 0.090279 | ENSG00000171502, | 300 | 6    | 19113 | 21.23667 | 1        | 0.938183 | 77.17625 |
| grey | UP_SEQ_FEATURE  | zinc finger region:C2H2-type 2                         | 15 | 3.90625  | 0.097902 | ENSG00000197013, | 300 | 608  | 19113 | 1.571793 | 1        | 0.946944 | 79.98643 |
| tur  | BIOCARTA        | h_stemPathway:Regulation of hematopoiesis by cytokines | 3  | 0.415512 | 0.07475  | ENSG00000153563, | 45  | 15   | 1437  | 6.386667 | 0.999713 | 0.999713 | 58.11504 |

| tur | Category      | Term                                                      | Count | %        | PValue   | Genes             | List Total | Pop Hits | Pop Total | Fold Enric | Bonferron | Benjamini | FDR      |
|-----|---------------|-----------------------------------------------------------|-------|----------|----------|-------------------|------------|----------|-----------|------------|-----------|-----------|----------|
| tur | COG_ONTOLOGY  | DNA replication, recombination, and repair                | 5     | 0.692521 | 0.092437 | ENSG000000091128, | 48         | 72       | 1950      | 2.821181   | 0.7166    | 0.7166    | 47.38388 |
| tur | GOTERM_BP_FAT | GO:0051047~positive regulation of secretion               | 12    | 1.66205  | 2.11E-04 | ENSG00000118702,  | 375        | 109      | 13528     | 3.971523   | 0.368345  | 0.368345  | 0.366492 |
| tur | GOTERM_BP_FAT | GO:0006936~muscle contraction                             | 14    | 1.939058 | 3.26E-04 | ENSG00000165887,  | 375        | 153      | 13528     | 3.30095    | 0.507424  | 0.298163  | 0.564327 |
| tur | GOTERM_BP_FAT | GO:0003012~muscle system process                          | 14    | 1.939058 | 7.96E-04 | ENSG00000165887,  | 375        | 168      | 13528     | 3.006222   | 0.822616  | 0.438127  | 1.372673 |
| tur | GOTERM_BP_FAT | GO:0044057~regulation of system process                   | 20    | 2.770083 | 9.91E-04 | ENSG00000111245,  | 375        | 309      | 13528     | 2.33493    | 0.883891  | 0.416263  | 1.706152 |
| tur | GOTERM_BP_FAT | GO:0048609~reproductive process in a multicellular orga   | 27    | 3.739612 | 0.001057 | ENSG00000198021,  | 375        | 487      | 13528     | 2.000033   | 0.899396  | 0.368282  | 1.81869  |
| tur | GOTERM_BP_FAT | GO:0032504~multicellular organism reproduction            | 27    | 3.739612 | 0.001057 | ENSG00000198021,  | 375        | 487      | 13528     | 2.000033   | 0.899396  | 0.368282  | 1.81869  |
| tur | GOTERM_BP_FAT | GO:0008016~regulation of heart contraction                | 9     | 1.246537 | 0.001263 | ENSG00000105866,  | 375        | 77       | 13528     | 4.216519   | 0.935718  | 0.367081  | 2.16953  |
| tur | GOTERM_BP_FAT | GO:0051050~positive regulation of transport               | 16    | 2.216066 | 0.001376 | ENSG00000160716,  | 375        | 223      | 13528     | 2.588317   | 0.949723  | 0.347648  | 2.361465 |
| tur | GOTERM_BP_FAT | GO:0030855~epithelial cell differentiation                | 12    | 1.66205  | 0.001469 | ENSG00000163216,  | 375        | 137      | 13528     | 3.159825   | 0.958981  | 0.329153  | 2.520147 |
| tur | GOTERM_BP_FAT | GO:0050871~positive regulation of B cell activation       | 6     | 0.831025 | 0.001972 | ENSG00000159958,  | 375        | 33       | 13528     | 6.55903    | 0.986261  | 0.378982  | 3.368604 |
| tur | GOTERM_BP_FAT | GO:0001820~serotonin secretion                            | 3     | 0.415512 | 0.002245 | ENSG00000108405,  | 375        | 3        | 13528     | 36.07467   | 0.992416  | 0.386256  | 3.826426 |
| tur | GOTERM_BP_FAT | GO:0008284~positive regulation of cell proliferation      | 23    | 3.185596 | 0.002655 | ENSG00000105894,  | 375        | 414      | 13528     | 2.004148   | 0.996897  | 0.408465  | 4.510832 |
| tur | GOTERM_BP_FAT | GO:0050864~regulation of B cell activation                | 7     | 0.969529 | 0.002703 | ENSG00000159958,  | 375        | 51       | 13528     | 4.951425   | 0.997201  | 0.387303  | 4.58959  |
| tur | GOTERM_BP_FAT | GO:0006928~cell motion                                    | 25    | 3.462604 | 0.00331  | ENSG00000146013,  | 375        | 475      | 13528     | 1.898667   | 0.999255  | 0.425367  | 5.993618 |
| tur | GOTERM_BP_FAT | GO:0060341~regulation of cellular localization            | 16    | 2.216066 | 0.003835 | ENSG00000112559,  | 375        | 248      | 13528     | 2.327398   | 0.999763  | 0.449042  | 6.452118 |
| tur | GOTERM_BP_FAT | GO:0051046~regulation of secretion                        | 14    | 1.939058 | 0.0041   | ENSG00000118702,  | 375        | 202      | 13528     | 2.500224   | 0.999867  | 0.448421  | 6.88415  |
| tur | GOTERM_BP_FAT | GO:0060429~epithelium development                         | 15    | 2.077562 | 0.00431  | ENSG00000182175,  | 375        | 227      | 13528     | 2.383789   | 0.999916  | 0.443678  | 7.224349 |
| tur | GOTERM_BP_FAT | GO:0045423~regulation of granulocyte macrophage colo      | 3     | 0.415512 | 0.004408 | ENSG00000112116,  | 375        | 4        | 13528     | 27.056     | 0.999932  | 0.431317  | 7.382012 |
| tur | GOTERM_BP_FAT | GO:0006837~serotonin transport                            | 3     | 0.415512 | 0.004408 | ENSG00000108405,  | 375        | 4        | 13528     | 27.056     | 0.999932  | 0.431317  | 7.382012 |
| tur | GOTERM_BP_FAT | GO:0032645~regulation of granulocyte macrophage colo      | 3     | 0.415512 | 0.004408 | ENSG00000112116,  | 375        | 4        | 13528     | 27.056     | 0.999932  | 0.431317  | 7.382012 |
| tur | GOTERM_BP_FAT | GO:0008015~blood circulation                              | 13    | 1.800554 | 0.005606 | ENSG00000111245,  | 375        | 186      | 13528     | 2.521348   | 0.999995  | 0.492523  | 9.29694  |
| tur | GOTERM_BP_FAT | GO:0003013~circulatory system process                     | 13    | 1.800554 | 0.005606 | ENSG00000111245,  | 375        | 186      | 13528     | 2.521348   | 0.999995  | 0.492523  | 9.29694  |
| tur | GOTERM_BP_FAT | GO:0007610~behavior                                       | 24    | 3.3241   | 0.005778 | ENSG00000105894,  | 375        | 469      | 13528     | 1.846038   | 0.999997  | 0.484416  | 9.569961 |
| tur | GOTERM_BP_FAT | GO:0002694~regulation of leukocyte activation             | 12    | 1.66205  | 0.006452 | ENSG00000159958,  | 375        | 166      | 13528     | 2.607807   | 0.999999  | 0.504862  | 10.62738 |
| tur | GOTERM_BP_FAT | GO:0007276~gamete generation                              | 21    | 2.908587 | 0.006806 | ENSG00000198021,  | 375        | 395      | 13528     | 1.917894   | 1         | 0.506533  | 11.17844 |
| tur | GOTERM_BP_FAT | GO:0007409~axonogenesis                                   | 13    | 1.800554 | 0.007466 | ENSG00000146013,  | 375        | 193      | 13528     | 2.4299     | 1         | 0.522839  | 12.19871 |
| tur | GOTERM_BP_FAT | GO:0000904~cell morphogenesis involved in differentiati   | 15    | 2.077562 | 0.00804  | ENSG00000146013,  | 375        | 244      | 13528     | 2.217705   | 1         | 0.533406  | 13.07494 |
| tur | GOTERM_BP_FAT | GO:0051249~regulation of lymphocyte activation            | 11    | 1.523546 | 0.008064 | ENSG00000159958,  | 375        | 148      | 13528     | 2.681225   | 1         | 0.519423  | 13.11217 |
| tur | GOTERM_BP_FAT | GO:0032103~positive regulation of response to external    | 7     | 0.969529 | 0.008344 | ENSG00000170989,  | 375        | 64       | 13528     | 3.945667   | 1         | 0.517128  | 13.53727 |
| tur | GOTERM_BP_FAT | GO:0003001~generation of a signal involved in cell-cell s | 8     | 1.108033 | 0.009087 | ENSG00000164082,  | 375        | 85       | 13528     | 3.395263   | 1         | 0.533543  | 14.65444 |
| tur | GOTERM_BP_FAT | GO:0050865~regulation of cell activation                  | 12    | 1.66205  | 0.009438 | ENSG00000159958,  | 375        | 175      | 13528     | 2.473691   | 1         | 0.533671  | 15.17803 |
| tur | GOTERM_BP_FAT | GO:0021954~central nervous system neuron developmer       | 5     | 0.692521 | 0.011216 | ENSG00000149295,  | 375        | 32       | 13528     | 5.636667   | 1         | 0.583105  | 17.78139 |
| tur | GOTERM_BP_FAT | GO:0001934~positive regulation of protein amino acid p    | 8     | 1.108033 | 0.011558 | ENSG00000118971,  | 375        | 89       | 13528     | 3.242667   | 1         | 0.581335  | 18.27406 |
| tur | GOTERM_BP_FAT | GO:0055065~metal ion homeostasis                          | 13    | 1.800554 | 0.011741 | ENSG00000018625,  | 375        | 205      | 13528     | 2.287662   | 1         | 0.574744  | 18.53626 |
| tur | GOTERM_BP_FAT | GO:0048232~male gamete generation                         | 17    | 2.354571 | 0.011872 | ENSG00000198021,  | 375        | 308      | 13528     | 1.991134   | 1         | 0.566904  | 18.72404 |
| tur | GOTERM_BP_FAT | GO:0007283~spermatogenesis                                | 17    | 2.354571 | 0.011872 | ENSG00000198021,  | 375        | 308      | 13528     | 1.991134   | 1         | 0.566904  | 18.72404 |
| tur | GOTERM_BP_FAT | GO:0031175~neuron projection development                  | 15    | 2.077562 | 0.011939 | ENSG00000146013,  | 375        | 256      | 13528     | 2.11375    | 1         | 0.557463  | 18.8193  |
| tur | GOTERM_BP_FAT | GO:0048667~cell morphogenesis involved in neuron diff     | 13    | 1.800554 | 0.013508 | ENSG00000146013,  | 375        | 209      | 13528     | 2.243879   | 1         | 0.591442  | 21.0281  |
| tur | GOTERM_BP_FAT | GO:0048584~positive regulation of response to stimulus    | 14    | 1.939058 | 0.014222 | ENSG00000159958,  | 375        | 236      | 13528     | 2.140023   | 1         | 0.599514  | 22.01507 |
| tur | GOTERM_BP_FAT | GO:0015858~nucleoside transport                           | 3     | 0.415512 | 0.0146   | ENSG00000197506,  | 375        | 7        | 13528     | 15.46057   | 1         | 0.598578  | 22.53277 |
| tur | GOTERM_BP_FAT | GO:0048812~neuron projection morphogenesis                | 13    | 1.800554 | 0.015497 | ENSG00000146013,  | 375        | 213      | 13528     | 2.20174    | 1         | 0.610265  | 23.74678 |
| tur | GOTERM_BP_FAT | GO:0015672~monovalent inorganic cation transport          | 17    | 2.354571 | 0.015684 | ENSG00000136531,  | 375        | 318      | 13528     | 1.92852    | 1         | 0.604641  | 23.99757 |
| tur | GOTERM_BP_FAT | GO:0046887~positive regulation of hormone secretion       | 5     | 0.692521 | 0.016857 | ENSG00000118702,  | 375        | 36       | 13528     | 5.01037    | 1         | 0.621576  | 25.55551 |
| tur | GOTERM_BP_FAT | GO:0045761~regulation of adenylate cyclase activity       | 8     | 1.108033 | 0.016996 | ENSG00000150594,  | 375        | 96       | 13528     | 3.006222   | 1         | 0.615068  | 25.7378  |
| tur | GOTERM_BP_FAT | GO:0007194~negative regulation of adenylate cyclase ac    | 6     | 0.831025 | 0.017658 | ENSG00000150594,  | 375        | 55       | 13528     | 3.935418   | 1         | 0.619922  | 26.60062 |
| tur | GOTERM_BP_FAT | GO:0051350~negative regulation of lyase activity          | 6     | 0.831025 | 0.017658 | ENSG00000150594,  | 375        | 55       | 13528     | 3.935418   | 1         | 0.619922  | 26.60062 |

|     |               |                                                                     |    |          |          |                  |     |     |       |          |   |          |          |
|-----|---------------|---------------------------------------------------------------------|----|----------|----------|------------------|-----|-----|-------|----------|---|----------|----------|
| tur | GOTERM_BP_FAT | GO:0031280~negative regulation of cyclase activity                  | 6  | 0.831025 | 0.017658 | ENSG00000150594, | 375 | 55  | 13528 | 3.935418 | 1 | 0.619922 | 26.60062 |
| tur | GOTERM_BP_FAT | GO:0042327~positive regulation of phosphorylation                   | 8  | 1.108033 | 0.017899 | ENSG00000118971, | 375 | 97  | 13528 | 2.97523  | 1 | 0.615874 | 26.91268 |
| tur | GOTERM_BP_FAT | GO:0031279~regulation of cyclase activity                           | 8  | 1.108033 | 0.019804 | ENSG00000150594, | 375 | 99  | 13528 | 2.915125 | 1 | 0.644576 | 29.33565 |
| tur | GOTERM_BP_FAT | GO:0009968~negative regulation of signal transduction               | 13 | 1.800554 | 0.020102 | ENSG00000150681, | 375 | 221 | 13528 | 2.122039 | 1 | 0.641472 | 29.70774 |
| tur | GOTERM_BP_FAT | GO:0044093~positive regulation of molecular function                | 26 | 3.601108 | 0.020741 | ENSG00000112559, | 375 | 586 | 13528 | 1.600582 | 1 | 0.644643 | 30.49908 |
| tur | GOTERM_BP_FAT | GO:0010562~positive regulation of phosphorus metabolism             | 8  | 1.108033 | 0.020808 | ENSG00000118971, | 375 | 100 | 13528 | 2.885973 | 1 | 0.637578 | 30.58165 |
| tur | GOTERM_BP_FAT | GO:0045937~positive regulation of phosphate metabolism              | 8  | 1.108033 | 0.020808 | ENSG00000118971, | 375 | 100 | 13528 | 2.885973 | 1 | 0.637578 | 30.58165 |
| tur | GOTERM_BP_FAT | GO:0007281~germ cell development                                    | 8  | 1.108033 | 0.021847 | ENSG00000143768, | 375 | 101 | 13528 | 2.857399 | 1 | 0.647606 | 31.84913 |
| tur | GOTERM_BP_FAT | GO:0030817~regulation of cAMP biosynthetic process                  | 8  | 1.108033 | 0.021847 | ENSG00000150594, | 375 | 101 | 13528 | 2.857399 | 1 | 0.647606 | 31.84913 |
| tur | GOTERM_BP_FAT | GO:0051339~regulation of lyase activity                             | 8  | 1.108033 | 0.021847 | ENSG00000150594, | 375 | 101 | 13528 | 2.857399 | 1 | 0.647606 | 31.84913 |
| tur | GOTERM_BP_FAT | GO:0006811~ion transport                                            | 32 | 4.432133 | 0.021962 | ENSG00000113946, | 375 | 768 | 13528 | 1.503111 | 1 | 0.641654 | 31.98835 |
| tur | GOTERM_BP_FAT | GO:0001932~regulation of protein amino acid phosphorylation         | 11 | 1.523546 | 0.022081 | ENSG00000112559, | 375 | 173 | 13528 | 2.293765 | 1 | 0.635916 | 32.13151 |
| tur | GOTERM_BP_FAT | GO:0021953~central nervous system neuron differentiation            | 5  | 0.692521 | 0.024006 | ENSG00000149295, | 375 | 40  | 13528 | 4.509333 | 1 | 0.659418 | 34.41386 |
| tur | GOTERM_BP_FAT | GO:0030814~regulation of cAMP metabolic process                     | 8  | 1.108033 | 0.024032 | ENSG00000150594, | 375 | 103 | 13528 | 2.801916 | 1 | 0.652397 | 34.44359 |
| tur | GOTERM_BP_FAT | GO:0048666~neuron development                                       | 17 | 2.354571 | 0.026652 | ENSG00000146013, | 375 | 339 | 13528 | 1.809054 | 1 | 0.683509 | 37.43245 |
| tur | GOTERM_BP_FAT | GO:0007267~cell-cell signaling                                      | 26 | 3.601108 | 0.027283 | ENSG00000164082, | 375 | 600 | 13528 | 1.563236 | 1 | 0.685077 | 38.13298 |
| tur | GOTERM_BP_FAT | GO:0009628~response to abiotic stimulus                             | 18 | 2.493075 | 0.027353 | ENSG00000064300, | 375 | 368 | 13528 | 1.764522 | 1 | 0.679076 | 38.20956 |
| tur | GOTERM_BP_FAT | GO:0002696~positive regulation of leukocyte activation              | 8  | 1.108033 | 0.027583 | ENSG00000159958, | 375 | 106 | 13528 | 2.722616 | 1 | 0.675365 | 38.46365 |
| tur | GOTERM_BP_FAT | GO:0032989~cellular component morphogenesis                         | 19 | 2.631579 | 0.027777 | ENSG00000146013, | 375 | 397 | 13528 | 1.726495 | 1 | 0.671116 | 38.66851 |
| tur | GOTERM_BP_FAT | GO:0007411~axon guidance                                            | 8  | 1.108033 | 0.028842 | ENSG00000064300, | 375 | 107 | 13528 | 2.697171 | 1 | 0.678616 | 39.83206 |
| tur | GOTERM_BP_FAT | GO:0019953~sexual reproduction                                      | 21 | 2.908587 | 0.029557 | ENSG00000198021, | 375 | 458 | 13528 | 1.654079 | 1 | 0.681219 | 40.59587 |
| tur | GOTERM_BP_FAT | GO:0032225~regulation of synaptic transmission, dopamine            | 3  | 0.415512 | 0.029622 | ENSG00000149295, | 375 | 10  | 13528 | 10.8224  | 1 | 0.675665 | 40.66304 |
| tur | GOTERM_BP_FAT | GO:0007188~G-protein signaling, coupled to cAMP nucleotide          | 7  | 0.969529 | 0.030183 | ENSG00000124089, | 375 | 85  | 13528 | 2.970855 | 1 | 0.676401 | 41.25752 |
| tur | GOTERM_BP_FAT | GO:0031424~keratinization                                           | 5  | 0.692521 | 0.030407 | ENSG00000163216, | 375 | 43  | 13528 | 4.194729 | 1 | 0.673012 | 41.49325 |
| tur | GOTERM_BP_FAT | GO:0003006~reproductive developmental process                       | 14 | 1.939058 | 0.030531 | ENSG00000118971, | 375 | 262 | 13528 | 1.927654 | 1 | 0.668469 | 41.62223 |
| tur | GOTERM_BP_FAT | GO:0030534~adult behavior                                           | 7  | 0.969529 | 0.031722 | ENSG00000164082, | 375 | 86  | 13528 | 2.93631  | 1 | 0.676737 | 42.85471 |
| tur | GOTERM_BP_FAT | GO:0043085~positive regulation of catalytic activity                | 23 | 3.185596 | 0.031755 | ENSG00000112559, | 375 | 520 | 13528 | 1.59561  | 1 | 0.671223 | 42.8838  |
| tur | GOTERM_BP_FAT | GO:0030802~regulation of cyclic nucleotide biosynthetic process     | 8  | 1.108033 | 0.032851 | ENSG00000150594, | 375 | 110 | 13528 | 2.623612 | 1 | 0.678127 | 44.00052 |
| tur | GOTERM_BP_FAT | GO:0030808~regulation of nucleotide biosynthetic process            | 8  | 1.108033 | 0.032851 | ENSG00000150594, | 375 | 110 | 13528 | 2.623612 | 1 | 0.678127 | 44.00052 |
| tur | GOTERM_BP_FAT | GO:0006813~potassium ion transport                                  | 10 | 1.385042 | 0.033753 | ENSG00000162687, | 375 | 160 | 13528 | 2.254667 | 1 | 0.682526 | 44.9009  |
| tur | GOTERM_BP_FAT | GO:0030001~metal ion transport                                      | 21 | 2.908587 | 0.034071 | ENSG00000136531, | 375 | 465 | 13528 | 1.629178 | 1 | 0.680431 | 45.21407 |
| tur | GOTERM_BP_FAT | GO:0050867~positive regulation of cell activation                   | 8  | 1.108033 | 0.034266 | ENSG00000159958, | 375 | 111 | 13528 | 2.599976 | 1 | 0.677062 | 45.40559 |
| tur | GOTERM_BP_FAT | GO:0014059~regulation of dopamine secretion                         | 3  | 0.415512 | 0.035551 | ENSG00000149295, | 375 | 11  | 13528 | 9.838545 | 1 | 0.685324 | 46.65321 |
| tur | GOTERM_BP_FAT | GO:0030216~keratinocyte differentiation                             | 6  | 0.831025 | 0.035569 | ENSG00000163216, | 375 | 66  | 13528 | 3.279515 | 1 | 0.680198 | 46.67084 |
| tur | GOTERM_BP_FAT | GO:0042471~ear morphogenesis                                        | 6  | 0.831025 | 0.035569 | ENSG00000121742, | 375 | 66  | 13528 | 3.279515 | 1 | 0.680198 | 46.67084 |
| tur | GOTERM_BP_FAT | GO:0046883~regulation of hormone secretion                          | 6  | 0.831025 | 0.035569 | ENSG00000118702, | 375 | 66  | 13528 | 3.279515 | 1 | 0.680198 | 46.67084 |
| tur | GOTERM_BP_FAT | GO:0030182~neuron differentiation                                   | 20 | 2.770083 | 0.035621 | ENSG00000137707, | 375 | 438 | 13528 | 1.647245 | 1 | 0.675493 | 46.72097 |
| tur | GOTERM_BP_FAT | GO:0048610~reproductive cellular process                            | 10 | 1.385042 | 0.036114 | ENSG00000143768, | 375 | 162 | 13528 | 2.226831 | 1 | 0.675421 | 47.19145 |
| tur | GOTERM_BP_FAT | GO:0055074~calcium ion homeostasis                                  | 11 | 1.523546 | 0.036256 | ENSG00000170989, | 375 | 188 | 13528 | 2.110752 | 1 | 0.671772 | 47.32641 |
| tur | GOTERM_BP_FAT | GO:0030799~regulation of cyclic nucleotide metabolic process        | 8  | 1.108033 | 0.037215 | ENSG00000150594, | 375 | 113 | 13528 | 2.553959 | 1 | 0.676452 | 48.22893 |
| tur | GOTERM_BP_FAT | GO:0050795~regulation of behavior                                   | 5  | 0.692521 | 0.037723 | ENSG00000170989, | 375 | 46  | 13528 | 3.921159 | 1 | 0.676526 | 48.70066 |
| tur | GOTERM_BP_FAT | GO:0009416~response to light stimulus                               | 9  | 1.246537 | 0.037799 | ENSG00000163207, | 375 | 138 | 13528 | 2.352696 | 1 | 0.672283 | 48.76266 |
| tur | GOTERM_BP_FAT | GO:0048858~cell projection morphogenesis                            | 13 | 1.800554 | 0.040069 | ENSG00000146013, | 375 | 245 | 13528 | 1.914166 | 1 | 0.689227 | 50.82881 |
| tur | GOTERM_BP_FAT | GO:0007187~G-protein signaling, coupled to cyclic nucleotide        | 8  | 1.108033 | 0.040327 | ENSG00000124089, | 375 | 115 | 13528 | 2.509542 | 1 | 0.686864 | 51.05835 |
| tur | GOTERM_BP_FAT | GO:0050731~positive regulation of peptidyl-tyrosine phosphorylation | 5  | 0.692521 | 0.040366 | ENSG00000099985, | 375 | 47  | 13528 | 3.83773  | 1 | 0.682526 | 51.09274 |
| tur | GOTERM_BP_FAT | GO:0007626~locomotory behavior                                      | 14 | 1.939058 | 0.041477 | ENSG00000164082, | 375 | 274 | 13528 | 1.843231 | 1 | 0.687979 | 52.06635 |
| tur | GOTERM_BP_FAT | GO:0010720~positive regulation of cell development                  | 6  | 0.831025 | 0.041875 | ENSG00000064300, | 375 | 69  | 13528 | 3.136928 | 1 | 0.686956 | 52.41094 |
| tur | GOTERM_BP_FAT | GO:0002675~positive regulation of acute inflammatory response       | 3  | 0.415512 | 0.041895 | ENSG00000099985, | 375 | 12  | 13528 | 9.018667 | 1 | 0.682609 | 52.42783 |

|     |               |                                                          |    |          |          |                  |     |      |       |          |   |          |          |
|-----|---------------|----------------------------------------------------------|----|----------|----------|------------------|-----|------|-------|----------|---|----------|----------|
| tur | GOTERM_BP_FAT | GO:0006140~regulation of nucleotide metabolic process    | 8  | 1.108033 | 0.041945 | ENSG00000150594, | 375 | 116  | 13528 | 2.487908 | 1 | 0.678581 | 52.47099 |
| tur | GOTERM_BP_FAT | GO:0010648~negative regulation of cell communication     | 13 | 1.800554 | 0.043311 | ENSG00000150681, | 375 | 248  | 13528 | 1.891011 | 1 | 0.686092 | 53.6332  |
| tur | GOTERM_BP_FAT | GO:0006955~immune response                               | 28 | 3.878116 | 0.043598 | ENSG00000161031, | 375 | 690  | 13528 | 1.4639   | 1 | 0.684193 | 53.87418 |
| tur | GOTERM_BP_FAT | GO:0030334~regulation of cell migration                  | 10 | 1.385042 | 0.045262 | ENSG00000126218, | 375 | 169  | 13528 | 2.134596 | 1 | 0.693814 | 55.24761 |
| tur | GOTERM_BP_FAT | GO:0051606~detection of stimulus                         | 8  | 1.108033 | 0.045306 | ENSG00000161031, | 375 | 118  | 13528 | 2.44574  | 1 | 0.689933 | 55.2835  |
| tur | GOTERM_BP_FAT | GO:0015837~amine transport                               | 8  | 1.108033 | 0.045306 | ENSG00000110195, | 375 | 118  | 13528 | 2.44574  | 1 | 0.689933 | 55.2835  |
| tur | GOTERM_BP_FAT | GO:0006875~cellular metal ion homeostasis                | 11 | 1.523546 | 0.045979 | ENSG00000170989, | 375 | 196  | 13528 | 2.024599 | 1 | 0.691219 | 55.82793 |
| tur | GOTERM_BP_FAT | GO:0048870~cell motility                                 | 15 | 2.077562 | 0.046316 | ENSG00000146013, | 375 | 307  | 13528 | 1.762606 | 1 | 0.689785 | 56.09802 |
| tur | GOTERM_BP_FAT | GO:0051674~localization of cell                          | 15 | 2.077562 | 0.046316 | ENSG00000146013, | 375 | 307  | 13528 | 1.762606 | 1 | 0.689785 | 56.09802 |
| tur | GOTERM_BP_FAT | GO:0006468~protein amino acid phosphorylation            | 27 | 3.739612 | 0.047735 | ENSG00000171094, | 375 | 667  | 13528 | 1.460294 | 1 | 0.696892 | 57.21791 |
| tur | GOTERM_BP_FAT | GO:0043583~ear development                               | 7  | 0.969529 | 0.047884 | ENSG00000121742, | 375 | 95   | 13528 | 2.658133 | 1 | 0.694003 | 57.33392 |
| tur | GOTERM_BP_FAT | GO:0019933~cAMP-mediated signaling                       | 7  | 0.969529 | 0.047884 | ENSG00000124089, | 375 | 95   | 13528 | 2.658133 | 1 | 0.694003 | 57.33392 |
| tur | GOTERM_BP_FAT | GO:0045995~regulation of embryonic development           | 3  | 0.415512 | 0.048626 | ENSG00000156574, | 375 | 13   | 13528 | 8.324923 | 1 | 0.695709 | 57.90728 |
| tur | GOTERM_BP_FAT | GO:0009913~epidermal cell differentiation                | 6  | 0.831025 | 0.048816 | ENSG00000163216, | 375 | 72   | 13528 | 3.006222 | 1 | 0.693197 | 58.05291 |
| tur | GOTERM_BP_FAT | GO:0006937~regulation of muscle contraction              | 6  | 0.831025 | 0.048816 | ENSG00000111245, | 375 | 72   | 13528 | 3.006222 | 1 | 0.693197 | 58.05291 |
| tur | GOTERM_BP_FAT | GO:0030030~cell projection organization                  | 17 | 2.354571 | 0.050259 | ENSG00000146013, | 375 | 368  | 13528 | 1.666493 | 1 | 0.700106 | 59.14462 |
| tur | GOTERM_BP_FAT | GO:0008277~regulation of G-protein coupled receptor p    | 5  | 0.692521 | 0.051966 | ENSG00000150681, | 375 | 51   | 13528 | 3.536732 | 1 | 0.708605 | 60.4006  |
| tur | GOTERM_BP_FAT | GO:0007605~sensory perception of sound                   | 7  | 0.969529 | 0.052056 | ENSG00000155719, | 375 | 97   | 13528 | 2.603326 | 1 | 0.705435 | 60.46548 |
| tur | GOTERM_BP_FAT | GO:0051251~positive regulation of lymphocyte activation  | 7  | 0.969529 | 0.052056 | ENSG00000159958, | 375 | 97   | 13528 | 2.603326 | 1 | 0.705435 | 60.46548 |
| tur | GOTERM_BP_FAT | GO:0032990~cell part morphogenesis                       | 13 | 1.800554 | 0.052657 | ENSG00000146013, | 375 | 256  | 13528 | 1.831917 | 1 | 0.705914 | 60.89859 |
| tur | GOTERM_BP_FAT | GO:0001763~morphogenesis of a branching structure        | 6  | 0.831025 | 0.053797 | ENSG00000171791, | 375 | 74   | 13528 | 2.924973 | 1 | 0.710101 | 61.70728 |
| tur | GOTERM_BP_FAT | GO:0045401~positive regulation of interleukin-3 biosynt  | 2  | 0.277008 | 0.05453  | ENSG00000179639, | 375 | 2    | 13528 | 36.07467 | 1 | 0.711417 | 62.21924 |
| tur | GOTERM_BP_FAT | GO:0045399~regulation of interleukin-3 biosynthetic pro  | 2  | 0.277008 | 0.05453  | ENSG00000179639, | 375 | 2    | 13528 | 36.07467 | 1 | 0.711417 | 62.21924 |
| tur | GOTERM_BP_FAT | GO:0032672~regulation of interleukin-3 production        | 2  | 0.277008 | 0.05453  | ENSG00000179639, | 375 | 2    | 13528 | 36.07467 | 1 | 0.711417 | 62.21924 |
| tur | GOTERM_BP_FAT | GO:0006812~cation transport                              | 23 | 3.185596 | 0.0552   | ENSG00000136531, | 375 | 553  | 13528 | 1.500393 | 1 | 0.712275 | 62.68069 |
| tur | GOTERM_BP_FAT | GO:0051954~positive regulation of amine transport        | 3  | 0.415512 | 0.055716 | ENSG00000149295, | 375 | 14   | 13528 | 7.730286 | 1 | 0.71211  | 63.03348 |
| tur | GOTERM_BP_FAT | GO:0007186~G-protein coupled receptor protein signalir   | 41 | 5.67867  | 0.057513 | ENSG00000164082, | 375 | 1123 | 13528 | 1.317063 | 1 | 0.720237 | 64.23581 |
| tur | GOTERM_BP_FAT | GO:0051345~positive regulation of hydrolase activity     | 10 | 1.385042 | 0.060829 | ENSG00000124089, | 375 | 179  | 13528 | 2.015345 | 1 | 0.737202 | 66.35809 |
| tur | GOTERM_BP_FAT | GO:0043279~response to alkaloid                          | 5  | 0.692521 | 0.061735 | ENSG00000164082, | 375 | 54   | 13528 | 3.340247 | 1 | 0.739136 | 66.91734 |
| tur | GOTERM_BP_FAT | GO:0008344~adult locomotory behavior                     | 5  | 0.692521 | 0.061735 | ENSG00000164082, | 375 | 54   | 13528 | 3.340247 | 1 | 0.739136 | 66.91734 |
| tur | GOTERM_BP_FAT | GO:0006939~smooth muscle contraction                     | 4  | 0.554017 | 0.062106 | ENSG00000149295, | 375 | 33   | 13528 | 4.372687 | 1 | 0.737914 | 67.14331 |
| tur | GOTERM_BP_FAT | GO:0046324~regulation of glucose import                  | 4  | 0.554017 | 0.062106 | ENSG00000105550, | 375 | 33   | 13528 | 4.372687 | 1 | 0.737914 | 67.14331 |
| tur | GOTERM_BP_FAT | GO:0050801~ion homeostasis                               | 18 | 2.493075 | 0.062987 | ENSG00000160716, | 375 | 409  | 13528 | 1.587638 | 1 | 0.739664 | 67.67536 |
| tur | GOTERM_BP_FAT | GO:0048511~rhythmic process                              | 8  | 1.108033 | 0.064665 | ENSG00000118702, | 375 | 128  | 13528 | 2.254667 | 1 | 0.745843 | 68.66533 |
| tur | GOTERM_BP_FAT | GO:0050671~positive regulation of lymphocyte proliferat  | 5  | 0.692521 | 0.065192 | ENSG00000159958, | 375 | 55   | 13528 | 3.279515 | 1 | 0.7455   | 68.9707  |
| tur | GOTERM_BP_FAT | GO:0050954~sensory perception of mechanical stimulus     | 7  | 0.969529 | 0.065866 | ENSG00000155719, | 375 | 103  | 13528 | 2.451676 | 1 | 0.745963 | 69.3564  |
| tur | GOTERM_BP_FAT | GO:0048520~positive regulation of behavior               | 4  | 0.554017 | 0.066775 | ENSG00000170989, | 375 | 34   | 13528 | 4.244078 | 1 | 0.747694 | 69.87018 |
| tur | GOTERM_BP_FAT | GO:0010827~regulation of glucose transport               | 4  | 0.554017 | 0.066775 | ENSG00000105550, | 375 | 34   | 13528 | 4.244078 | 1 | 0.747694 | 69.87018 |
| tur | GOTERM_BP_FAT | GO:0050806~positive regulation of synaptic transmission  | 4  | 0.554017 | 0.066775 | ENSG00000160716, | 375 | 34   | 13528 | 4.244078 | 1 | 0.747694 | 69.87018 |
| tur | GOTERM_BP_FAT | GO:0002684~positive regulation of immune system proc     | 12 | 1.66205  | 0.066925 | ENSG00000159958, | 375 | 238  | 13528 | 1.818891 | 1 | 0.745324 | 69.95402 |
| tur | GOTERM_BP_FAT | GO:0048839~inner ear development                         | 6  | 0.831025 | 0.067494 | ENSG00000121742, | 375 | 79   | 13528 | 2.739848 | 1 | 0.745223 | 70.2702  |
| tur | GOTERM_BP_FAT | GO:0006874~cellular calcium ion homeostasis              | 10 | 1.385042 | 0.067909 | ENSG00000170989, | 375 | 183  | 13528 | 1.971293 | 1 | 0.744314 | 70.49948 |
| tur | GOTERM_BP_FAT | GO:0042472~inner ear morphogenesis                       | 5  | 0.692521 | 0.068749 | ENSG00000162676, | 375 | 56   | 13528 | 3.220952 | 1 | 0.745652 | 70.95718 |
| tur | GOTERM_BP_FAT | GO:0032946~positive regulation of mononuclear cell pro   | 5  | 0.692521 | 0.068749 | ENSG00000159958, | 375 | 56   | 13528 | 3.220952 | 1 | 0.745652 | 70.95718 |
| tur | GOTERM_BP_FAT | GO:0070665~positive regulation of leukocyte proliferatio | 5  | 0.692521 | 0.068749 | ENSG00000159958, | 375 | 56   | 13528 | 3.220952 | 1 | 0.745652 | 70.95718 |
| tur | GOTERM_BP_FAT | GO:0009408~response to heat                              | 5  | 0.692521 | 0.068749 | ENSG00000171791, | 375 | 56   | 13528 | 3.220952 | 1 | 0.745652 | 70.95718 |
| tur | GOTERM_BP_FAT | GO:0019935~cyclic-nucleotide-mediated signaling          | 8  | 1.108033 | 0.069056 | ENSG00000124089, | 375 | 130  | 13528 | 2.219979 | 1 | 0.744194 | 71.12327 |
| tur | GOTERM_BP_FAT | GO:0042127~regulation of cell proliferation              | 30 | 4.155125 | 0.070114 | ENSG00000105894, | 375 | 787  | 13528 | 1.375146 | 1 | 0.746642 | 71.68748 |



|     |               |                                                          |    |          |          |                  |     |      |       |          |   |          |          |
|-----|---------------|----------------------------------------------------------|----|----------|----------|------------------|-----|------|-------|----------|---|----------|----------|
| tur | GOTERM_BP_FAT | GO:0045577~regulation of B cell differentiation          | 3  | 0.415512 | 0.07088  | ENSG00000147168, | 375 | 16   | 13528 | 6.764    | 1 | 0.74755  | 72.08951 |
| tur | GOTERM_BP_FAT | GO:0002026~regulation of the force of heart contraction  | 3  | 0.415512 | 0.07088  | ENSG00000018625, | 375 | 16   | 13528 | 6.764    | 1 | 0.74755  | 72.08951 |
| tur | GOTERM_BP_FAT | GO:0010647~positive regulation of cell communication     | 15 | 2.077562 | 0.073422 | ENSG00000160716, | 375 | 329  | 13528 | 1.644742 | 1 | 0.757231 | 73.38605 |
| tur | GOTERM_BP_FAT | GO:0045786~negative regulation of cell cycle             | 6  | 0.831025 | 0.073466 | ENSG00000137707, | 375 | 81   | 13528 | 2.672198 | 1 | 0.754517 | 73.40805 |
| tur | GOTERM_BP_FAT | GO:0046903~secretion                                     | 14 | 1.939058 | 0.073844 | ENSG00000164082, | 375 | 300  | 13528 | 1.683484 | 1 | 0.753445 | 73.59575 |
| tur | GOTERM_BP_FAT | GO:0032101~regulation of response to external stimulus   | 9  | 1.246537 | 0.074231 | ENSG00000170989, | 375 | 159  | 13528 | 2.041962 | 1 | 0.75243  | 73.78646 |
| tur | GOTERM_BP_FAT | GO:0048562~embryonic organ morphogenesis                 | 8  | 1.108033 | 0.07597  | ENSG00000121742, | 375 | 133  | 13528 | 2.169905 | 1 | 0.75787  | 74.62832 |
| tur | GOTERM_BP_FAT | GO:0000187~activation of MAPK activity                   | 6  | 0.831025 | 0.076557 | ENSG00000150594, | 375 | 82   | 13528 | 2.63961  | 1 | 0.757795 | 74.90676 |
| tur | GOTERM_BP_FAT | GO:0007422~peripheral nervous system development         | 4  | 0.554017 | 0.076577 | ENSG00000146013, | 375 | 36   | 13528 | 4.008296 | 1 | 0.755078 | 74.91592 |
| tur | GOTERM_BP_FAT | GO:0010927~cellular component assembly involved in m     | 4  | 0.554017 | 0.076577 | ENSG00000111245, | 375 | 36   | 13528 | 4.008296 | 1 | 0.755078 | 74.91592 |
| tur | GOTERM_BP_FAT | GO:0045596~negative regulation of cell differentiation   | 11 | 1.523546 | 0.077614 | ENSG00000064300, | 375 | 216  | 13528 | 1.837136 | 1 | 0.757114 | 75.40068 |
| tur | GOTERM_BP_FAT | GO:0002252~immune effector process                       | 8  | 1.108033 | 0.078362 | ENSG00000069431, | 375 | 134  | 13528 | 2.153711 | 1 | 0.757785 | 75.74452 |
| tur | GOTERM_BP_FAT | GO:0015844~monoamine transport                           | 3  | 0.415512 | 0.078906 | ENSG00000108405, | 375 | 17   | 13528 | 6.366118 | 1 | 0.757522 | 75.99165 |
| tur | GOTERM_BP_FAT | GO:0050850~positive regulation of calcium-mediated sig   | 3  | 0.415512 | 0.078906 | ENSG00000153563, | 375 | 17   | 13528 | 6.366118 | 1 | 0.757522 | 75.99165 |
| tur | GOTERM_BP_FAT | GO:0008306~associative learning                          | 3  | 0.415512 | 0.078906 | ENSG00000149295, | 375 | 17   | 13528 | 6.366118 | 1 | 0.757522 | 75.99165 |
| tur | GOTERM_BP_FAT | GO:0050670~regulation of lymphocyte proliferation        | 6  | 0.831025 | 0.079718 | ENSG00000159958, | 375 | 83   | 13528 | 2.607807 | 1 | 0.758474 | 76.35656 |
| tur | GOTERM_BP_FAT | GO:0009266~response to temperature stimulus              | 6  | 0.831025 | 0.079718 | ENSG00000064300, | 375 | 83   | 13528 | 2.607807 | 1 | 0.758474 | 76.35656 |
| tur | GOTERM_BP_FAT | GO:0050769~positive regulation of neurogenesis           | 5  | 0.692521 | 0.080001 | ENSG00000064300, | 375 | 59   | 13528 | 3.057175 | 1 | 0.757051 | 76.48261 |
| tur | GOTERM_BP_FAT | GO:0032224~positive regulation of synaptic transmission  | 2  | 0.277008 | 0.080673 | ENSG00000006128, | 375 | 3    | 13528 | 24.04978 | 1 | 0.757374 | 76.77893 |
| tur | GOTERM_BP_FAT | GO:0045425~positive regulation of granulocyte macroph    | 2  | 0.277008 | 0.080673 | ENSG00000179639, | 375 | 3    | 13528 | 24.04978 | 1 | 0.757374 | 76.77893 |
| tur | GOTERM_BP_FAT | GO:0015860~purine nucleoside transport                   | 2  | 0.277008 | 0.080673 | ENSG00000197506, | 375 | 3    | 13528 | 24.04978 | 1 | 0.757374 | 76.77893 |
| tur | GOTERM_BP_FAT | GO:0032656~regulation of interleukin-13 production       | 2  | 0.277008 | 0.080673 | ENSG00000149021, | 375 | 3    | 13528 | 24.04978 | 1 | 0.757374 | 76.77893 |
| tur | GOTERM_BP_FAT | GO:0033603~positive regulation of dopamine secretion     | 2  | 0.277008 | 0.080673 | ENSG00000160716, | 375 | 3    | 13528 | 24.04978 | 1 | 0.757374 | 76.77893 |
| tur | GOTERM_BP_FAT | GO:0051051~negative regulation of transport              | 8  | 1.108033 | 0.080797 | ENSG00000112559, | 375 | 135  | 13528 | 2.137758 | 1 | 0.75527  | 76.83337 |
| tur | GOTERM_BP_FAT | GO:0051971~positive regulation of transmission of nerve  | 4  | 0.554017 | 0.081701 | ENSG00000160716, | 375 | 37   | 13528 | 3.899964 | 1 | 0.756629 | 77.22568 |
| tur | GOTERM_BP_FAT | GO:0001667~ameboidal cell migration                      | 4  | 0.554017 | 0.081701 | ENSG00000107562, | 375 | 37   | 13528 | 3.899964 | 1 | 0.756629 | 77.22568 |
| tur | GOTERM_BP_FAT | GO:0032944~regulation of mononuclear cell proliferation  | 6  | 0.831025 | 0.082947 | ENSG00000159958, | 375 | 84   | 13528 | 2.576762 | 1 | 0.759445 | 77.75618 |
| tur | GOTERM_BP_FAT | GO:0070663~regulation of leukocyte proliferation         | 6  | 0.831025 | 0.082947 | ENSG00000159958, | 375 | 84   | 13528 | 2.576762 | 1 | 0.759445 | 77.75618 |
| tur | GOTERM_BP_FAT | GO:0050804~regulation of synaptic transmission           | 8  | 1.108033 | 0.083276 | ENSG00000149295, | 375 | 136  | 13528 | 2.122039 | 1 | 0.758274 | 77.89423 |
| tur | GOTERM_BP_FAT | GO:0007166~cell surface receptor linked signal transduct | 62 | 8.587258 | 0.083786 | ENSG00000164082, | 375 | 1856 | 13528 | 1.20508  | 1 | 0.757892 | 78.10675 |
| tur | GOTERM_BP_FAT | GO:0007612~learning                                      | 5  | 0.692521 | 0.083943 | ENSG00000105894, | 375 | 60   | 13528 | 3.006222 | 1 | 0.756009 | 78.17182 |
| tur | GOTERM_BP_FAT | GO:0007565~female pregnancy                              | 7  | 0.969529 | 0.084435 | ENSG00000204941, | 375 | 110  | 13528 | 2.295661 | 1 | 0.75557  | 78.37427 |
| tur | GOTERM_BP_FAT | GO:0051336~regulation of hydrolase activity              | 15 | 2.077562 | 0.085709 | ENSG00000134571, | 375 | 337  | 13528 | 1.605697 | 1 | 0.758437 | 78.89092 |
| tur | GOTERM_BP_FAT | GO:0040012~regulation of locomotion                      | 10 | 1.385042 | 0.085716 | ENSG00000126218, | 375 | 192  | 13528 | 1.878889 | 1 | 0.755965 | 78.89348 |
| tur | GOTERM_BP_FAT | GO:0048477~oogenesis                                     | 4  | 0.554017 | 0.08697  | ENSG00000143768, | 375 | 38   | 13528 | 3.797333 | 1 | 0.758706 | 79.39037 |
| tur | GOTERM_BP_FAT | GO:0006940~regulation of smooth muscle contraction       | 4  | 0.554017 | 0.08697  | ENSG00000018625, | 375 | 38   | 13528 | 3.797333 | 1 | 0.758706 | 79.39037 |
| tur | GOTERM_BP_FAT | GO:0009595~detection of biotic stimulus                  | 3  | 0.415512 | 0.087198 | ENSG00000161031, | 375 | 18   | 13528 | 6.012444 | 1 | 0.757189 | 79.47981 |
| tur | GOTERM_BP_FAT | GO:0046823~negative regulation of nucleocytoplasmic tr   | 3  | 0.415512 | 0.087198 | ENSG00000112559, | 375 | 18   | 13528 | 6.012444 | 1 | 0.757189 | 79.47981 |
| tur | GOTERM_BP_FAT | GO:0051270~regulation of cell motion                     | 10 | 1.385042 | 0.087873 | ENSG00000126218, | 375 | 193  | 13528 | 1.869154 | 1 | 0.757518 | 79.74164 |
| tur | GOTERM_BP_FAT | GO:0002703~regulation of leukocyte mediated immunity     | 5  | 0.692521 | 0.087979 | ENSG00000113520, | 375 | 61   | 13528 | 2.95694  | 1 | 0.755519 | 79.78221 |
| tur | GOTERM_BP_FAT | GO:0016049~cell growth                                   | 5  | 0.692521 | 0.087979 | ENSG00000143768, | 375 | 61   | 13528 | 2.95694  | 1 | 0.755519 | 79.78221 |
| tur | GOTERM_BP_FAT | GO:0050767~regulation of neurogenesis                    | 9  | 1.246537 | 0.089909 | ENSG00000064300, | 375 | 166  | 13528 | 1.955855 | 1 | 0.760918 | 80.51227 |
| tur | GOTERM_BP_FAT | GO:0045165~cell fate commitment                          | 8  | 1.108033 | 0.090972 | ENSG00000171791, | 375 | 139  | 13528 | 2.07624  | 1 | 0.76275  | 80.90366 |
| tur | GOTERM_BP_FAT | GO:0022602~ovulation cycle process                       | 5  | 0.692521 | 0.092106 | ENSG00000118971, | 375 | 62   | 13528 | 2.909247 | 1 | 0.764824 | 81.31309 |
| tur | GOTERM_BP_FAT | GO:0031646~positive regulation of neurological system p  | 4  | 0.554017 | 0.092378 | ENSG00000160716, | 375 | 39   | 13528 | 3.699966 | 1 | 0.763535 | 81.40984 |
| tur | GOTERM_BP_FAT | GO:0033555~multicellular organismal response to stress   | 4  | 0.554017 | 0.092378 | ENSG00000150594, | 375 | 39   | 13528 | 3.699966 | 1 | 0.763535 | 81.40984 |
| tur | GOTERM_BP_FAT | GO:0050927~positive regulation of positive chemotaxis    | 3  | 0.415512 | 0.095737 | ENSG00000170989, | 375 | 19   | 13528 | 5.696    | 1 | 0.773936 | 82.5688  |
| tur | GOTERM_BP_FAT | GO:0014073~response to tropane                           | 3  | 0.415512 | 0.095737 | ENSG00000164082, | 375 | 19   | 13528 | 5.696    | 1 | 0.773936 | 82.5688  |

|     |               |                                                       |     |          |          |                   |     |      |       |          |          |          |          |
|-----|---------------|-------------------------------------------------------|-----|----------|----------|-------------------|-----|------|-------|----------|----------|----------|----------|
| tur | GOTERM_BP_FAT | GO:0050926~regulation of positive chemotaxis          | 3   | 0.415512 | 0.095737 | ENSG00000170989,  | 375 | 19   | 13528 | 5.696    | 1        | 0.773936 | 82.5688  |
| tur | GOTERM_BP_FAT | GO:0042220~response to cocaine                        | 3   | 0.415512 | 0.095737 | ENSG00000164082,  | 375 | 19   | 13528 | 5.696    | 1        | 0.773936 | 82.5688  |
| tur | GOTERM_BP_FAT | GO:0050433~regulation of catecholamine secretion      | 3   | 0.415512 | 0.095737 | ENSG00000149295,  | 375 | 19   | 13528 | 5.696    | 1        | 0.773936 | 82.5688  |
| tur | GOTERM_BP_FAT | GO:0006873~cellular ion homeostasis                   | 16  | 2.216066 | 0.097065 | ENSG00000160716,  | 375 | 374  | 13528 | 1.543301 | 1        | 0.776526 | 83.00793 |
| tur | GOTERM_BP_FAT | GO:0051224~negative regulation of protein transport   | 4   | 0.554017 | 0.097921 | ENSG00000112559,  | 375 | 40   | 13528 | 3.607467 | 1        | 0.777367 | 83.2854  |
| tur | GOTERM_CC_FAT | GO:0005576~extracellular region                       | 92  | 12.74238 | 5.50E-06 | ENSG000000066468, | 372 | 2010 | 12782 | 1.572706 | 0.001748 | 0.001748 | 0.007415 |
| tur | GOTERM_CC_FAT | GO:0031226~intrinsic to plasma membrane               | 59  | 8.171745 | 9.89E-05 | ENSG00000164082,  | 372 | 1215 | 12782 | 1.668521 | 0.030955 | 0.015599 | 0.133219 |
| tur | GOTERM_CC_FAT | GO:0005887~integral to plasma membrane                | 58  | 8.033241 | 9.89E-05 | ENSG00000164082,  | 372 | 1188 | 12782 | 1.677519 | 0.030961 | 0.010429 | 0.133248 |
| tur | GOTERM_CC_FAT | GO:0034702~ion channel complex                        | 16  | 2.216066 | 9.51E-04 | ENSG00000136531,  | 372 | 205  | 12782 | 2.681773 | 0.261123 | 0.072865 | 1.274786 |
| tur | GOTERM_CC_FAT | GO:0044421~extracellular region part                  | 44  | 6.094183 | 0.002909 | ENSG00000105894,  | 372 | 960  | 12782 | 1.574843 | 0.604044 | 0.169137 | 3.851592 |
| tur | GOTERM_CC_FAT | GO:0009986~cell surface                               | 21  | 2.908587 | 0.00291  | ENSG00000146013,  | 372 | 348  | 12782 | 2.073461 | 0.604113 | 0.143103 | 3.852295 |
| tur | GOTERM_CC_FAT | GO:0044459~plasma membrane part                       | 85  | 11.77285 | 0.004051 | ENSG00000146013,  | 372 | 2203 | 12782 | 1.325746 | 0.724945 | 0.168395 | 5.325285 |
| tur | GOTERM_CC_FAT | GO:0005886~plasma membrane                            | 134 | 18.55956 | 0.004632 | ENSG00000146013,  | 372 | 3777 | 12782 | 1.219028 | 0.771574 | 0.168537 | 6.06795  |
| tur | GOTERM_CC_FAT | GO:0009897~external side of plasma membrane           | 12  | 1.66205  | 0.010783 | ENSG00000155719,  | 372 | 170  | 12782 | 2.425427 | 0.968176 | 0.318227 | 13.59794 |
| tur | GOTERM_CC_FAT | GO:0005578~proteinaceous extracellular matrix         | 18  | 2.493075 | 0.012282 | ENSG00000167346,  | 372 | 320  | 12782 | 1.932762 | 0.980354 | 0.324965 | 15.34699 |
| tur | GOTERM_CC_FAT | GO:0034707~chloride channel complex                   | 6   | 0.831025 | 0.021294 | ENSG00000151572,  | 372 | 55   | 12782 | 3.748387 | 0.998935 | 0.463261 | 25.18727 |
| tur | GOTERM_CC_FAT | GO:0031012~extracellular matrix                       | 18  | 2.493075 | 0.023718 | ENSG00000167346,  | 372 | 345  | 12782 | 1.792707 | 0.999516 | 0.470654 | 27.64739 |
| tur | GOTERM_CC_FAT | GO:0030017~sarcomere                                  | 8   | 1.108033 | 0.023809 | ENSG00000165887,  | 372 | 98   | 12782 | 2.804916 | 0.99953  | 0.445369 | 27.73787 |
| tur | GOTERM_CC_FAT | GO:0005615~extracellular space                        | 30  | 4.155125 | 0.026848 | ENSG00000105894,  | 372 | 685  | 12782 | 1.504827 | 0.999826 | 0.461074 | 30.71277 |
| tur | GOTERM_CC_FAT | GO:0030016~myofibril                                  | 8   | 1.108033 | 0.042704 | ENSG00000165887,  | 372 | 111  | 12782 | 2.476412 | 0.999999 | 0.603553 | 44.4769  |
| tur | GOTERM_CC_FAT | GO:0042383~sarcolemma                                 | 6   | 0.831025 | 0.044773 | ENSG00000136531,  | 372 | 67   | 12782 | 3.077034 | 1        | 0.597637 | 46.0735  |
| tur | GOTERM_CC_FAT | GO:0044449~contractile fiber part                     | 8   | 1.108033 | 0.046279 | ENSG00000165887,  | 372 | 113  | 12782 | 2.432582 | 1        | 0.58785  | 47.20867 |
| tur | GOTERM_CC_FAT | GO:0043292~contractile fiber                          | 8   | 1.108033 | 0.062464 | ENSG00000165887,  | 372 | 121  | 12782 | 2.27175  | 1        | 0.680022 | 58.08694 |
| tur | GOTERM_CC_FAT | GO:0031672~A band                                     | 3   | 0.415512 | 0.077145 | ENSG00000134571,  | 372 | 16   | 12782 | 6.44254  | 1        | 0.739116 | 66.12005 |
| tur | GOTERM_CC_FAT | GO:0034703~cation channel complex                     | 8   | 1.108033 | 0.089724 | ENSG00000136531,  | 372 | 132  | 12782 | 2.082437 | 1        | 0.775688 | 71.84313 |
| tur | GOTERM_MF_FAT | GO:0022838~substrate specific channel activity        | 23  | 3.185596 | 0.001942 | ENSG00000136531,  | 365 | 398  | 12983 | 2.055545 | 0.675491 | 0.675491 | 2.816381 |
| tur | GOTERM_MF_FAT | GO:0015267~channel activity                           | 23  | 3.185596 | 0.002921 | ENSG00000136531,  | 365 | 412  | 12983 | 1.985696 | 0.816172 | 0.571248 | 4.208275 |
| tur | GOTERM_MF_FAT | GO:0005216~ion channel activity                       | 22  | 3.047091 | 0.002937 | ENSG00000136531,  | 365 | 386  | 12983 | 2.027298 | 0.817877 | 0.433167 | 4.230935 |
| tur | GOTERM_MF_FAT | GO:0022803~passive transmembrane transporter activity | 23  | 3.185596 | 0.003038 | ENSG00000136531,  | 365 | 413  | 12983 | 1.980888 | 0.828246 | 0.356236 | 4.373334 |
| tur | GOTERM_MF_FAT | GO:0005179~hormone activity                           | 10  | 1.385042 | 0.003308 | ENSG00000118702,  | 365 | 108  | 12983 | 3.293506 | 0.853179 | 0.31867  | 4.753302 |
| tur | GOTERM_MF_FAT | GO:0008083~growth factor activity                     | 12  | 1.66205  | 0.005693 | ENSG00000105894,  | 365 | 161  | 12983 | 2.65117  | 0.963321 | 0.423584 | 8.048376 |
| tur | GOTERM_MF_FAT | GO:0016247~channel regulator activity                 | 7   | 0.969529 | 0.006009 | ENSG00000150594,  | 365 | 59   | 12983 | 4.220153 | 0.969488 | 0.39257  | 8.477003 |
| tur | GOTERM_MF_FAT | GO:0032036~myosin heavy chain binding                 | 3   | 0.415512 | 0.007411 | ENSG00000111245,  | 365 | 5    | 12983 | 21.34192 | 0.986528 | 0.416316 | 10.35674 |
| tur | GOTERM_MF_FAT | GO:0005261~cation channel activity                    | 16  | 2.216066 | 0.010853 | ENSG00000136531,  | 365 | 275  | 12983 | 2.069519 | 0.998197 | 0.504423 | 14.8182  |
| tur | GOTERM_MF_FAT | GO:0046873~metal ion transmembrane transporter activ  | 18  | 2.493075 | 0.011192 | ENSG00000136531,  | 365 | 328  | 12983 | 1.952005 | 0.998522 | 0.478833 | 15.24645 |
| tur | GOTERM_MF_FAT | GO:0005337~nucleoside transmembrane transporter activ | 3   | 0.415512 | 0.019626 | ENSG00000197506,  | 365 | 8    | 12983 | 13.3387  | 0.99999  | 0.647718 | 25.27222 |
| tur | GOTERM_MF_FAT | GO:0017022~myosin binding                             | 4   | 0.554017 | 0.022672 | ENSG00000111245,  | 365 | 22   | 12983 | 6.467248 | 0.999998 | 0.669287 | 28.61248 |
| tur | GOTERM_MF_FAT | GO:0016917~GABA receptor activity                     | 4   | 0.554017 | 0.028601 | ENSG00000187730,  | 365 | 24   | 12983 | 5.928311 | 1        | 0.725392 | 34.71982 |
| tur | GOTERM_MF_FAT | GO:0022836~gated channel activity                     | 16  | 2.216066 | 0.028634 | ENSG00000136531,  | 365 | 310  | 12983 | 1.835864 | 1        | 0.699257 | 34.75237 |
| tur | GOTERM_MF_FAT | GO:0005267~potassium channel activity                 | 9   | 1.246537 | 0.033624 | ENSG00000162687,  | 365 | 133  | 12983 | 2.406983 | 1        | 0.732917 | 39.50887 |
| tur | GOTERM_MF_FAT | GO:0004714~transmembrane receptor protein tyrosine k  | 6   | 0.831025 | 0.039543 | ENSG00000171094,  | 365 | 67   | 12983 | 3.185361 | 1        | 0.767769 | 44.73195 |
| tur | GOTERM_MF_FAT | GO:0015459~potassium channel regulator activity       | 4   | 0.554017 | 0.042667 | ENSG00000150594,  | 365 | 28   | 12983 | 5.081409 | 1        | 0.773517 | 47.31565 |
| tur | GOTERM_MF_FAT | GO:0005254~chloride channel activity                  | 6   | 0.831025 | 0.051262 | ENSG00000151572,  | 365 | 72   | 12983 | 2.964155 | 1        | 0.815976 | 53.85607 |
| tur | GOTERM_MF_FAT | GO:0017116~single-stranded DNA-dependent ATP-depe     | 2   | 0.277008 | 0.055289 | ENSG00000140451,  | 365 | 2    | 12983 | 35.56986 | 1        | 0.823289 | 56.6528  |
| tur | GOTERM_MF_FAT | GO:0031420~alkali metal ion binding                   | 12  | 1.66205  | 0.056623 | ENSG00000162687,  | 365 | 228  | 12983 | 1.872098 | 1        | 0.815015 | 57.54369 |
| tur | GOTERM_MF_FAT | GO:0015932~nucleobase, nucleoside, nucleotide and nuc | 3   | 0.415512 | 0.057122 | ENSG00000197506,  | 365 | 14   | 12983 | 7.622114 | 1        | 0.802438 | 57.87234 |
| tur | GOTERM_MF_FAT | GO:0031404~chloride ion binding                       | 6   | 0.831025 | 0.064807 | ENSG00000151572,  | 365 | 77   | 12983 | 2.771678 | 1        | 0.828534 | 62.64644 |
| tur | GOTERM_MF_FAT | GO:0005253~anion channel activity                     | 6   | 0.831025 | 0.067734 | ENSG00000151572,  | 365 | 78   | 12983 | 2.736143 | 1        | 0.828921 | 64.3287  |

|     |                          |                                                          |    |          |          |                  |     |      |       |          |          |          |          |
|-----|--------------------------|----------------------------------------------------------|----|----------|----------|------------------|-----|------|-------|----------|----------|----------|----------|
| tur | GOTERM_MF_FAT            | GO:0030247~polysaccharide binding                        | 9  | 1.246537 | 0.068337 | ENSG00000105894, | 365 | 154  | 12983 | 2.078758 | 1        | 0.81871  | 64.66596 |
| tur | GOTERM_MF_FAT            | GO:0001871~pattern binding                               | 9  | 1.246537 | 0.068337 | ENSG00000105894, | 365 | 154  | 12983 | 2.078758 | 1        | 0.81871  | 64.66596 |
| tur | GOTERM_MF_FAT            | GO:0005246~calcium channel regulator activity            | 3  | 0.415512 | 0.080837 | ENSG00000164082, | 365 | 17   | 12983 | 6.277035 | 1        | 0.858038 | 71.02834 |
| tur | GOTERM_MF_FAT            | GO:0043141~ATP-dependent 5'-3' DNA helicase activity     | 2  | 0.277008 | 0.08178  | ENSG00000140451, | 365 | 3    | 12983 | 23.71324 | 1        | 0.850427 | 71.46222 |
| tur | GOTERM_MF_FAT            | GO:0005415~nucleoside:sodium symporter activity          | 2  | 0.277008 | 0.08178  | ENSG00000197506, | 365 | 3    | 12983 | 23.71324 | 1        | 0.850427 | 71.46222 |
| tur | GOTERM_MF_FAT            | GO:0043142~single-stranded DNA-dependent ATPase ac       | 2  | 0.277008 | 0.08178  | ENSG00000140451, | 365 | 3    | 12983 | 23.71324 | 1        | 0.850427 | 71.46222 |
| tur | GOTERM_MF_FAT            | GO:0005198~structural molecule activity                  | 25 | 3.462604 | 0.083588 | ENSG00000165887, | 365 | 634  | 12983 | 1.402597 | 1        | 0.846163 | 72.27694 |
| tur | GOTERM_MF_FAT            | GO:0001882~nucleoside binding                            | 55 | 7.617729 | 0.093368 | ENSG00000077935, | 365 | 1612 | 12983 | 1.213612 | 1        | 0.868256 | 76.32161 |
| tur | GOTERM_MF_FAT            | GO:0005201~extracellular matrix structural constituent   | 6  | 0.831025 | 0.093728 | ENSG00000112769, | 365 | 86   | 12983 | 2.481618 | 1        | 0.859835 | 76.45947 |
| tur | GOTERM_MF_FAT            | GO:0004713~protein tyrosine kinase activity              | 9  | 1.246537 | 0.095477 | ENSG00000171094, | 365 | 166  | 12983 | 1.928487 | 1        | 0.855821 | 77.11813 |
| tur | GOTERM_MF_FAT            | GO:0005244~voltage-gated ion channel activity            | 10 | 1.385042 | 0.096605 | ENSG00000136531, | 365 | 195  | 12983 | 1.824096 | 1        | 0.850062 | 77.53394 |
| tur | GOTERM_MF_FAT            | GO:0005125~cytokine activity                             | 10 | 1.385042 | 0.096605 | ENSG00000143768, | 365 | 195  | 12983 | 1.824096 | 1        | 0.850062 | 77.53394 |
| tur | GOTERM_MF_FAT            | GO:0022832~voltage-gated channel activity                | 10 | 1.385042 | 0.096605 | ENSG00000136531, | 365 | 195  | 12983 | 1.824096 | 1        | 0.850062 | 77.53394 |
| tur | HIV_INTERACTION          | env:Envelope surface glycoprotein gp120                  | 22 | 3.047091 | 0.040845 | ENSG00000138308, | 41  | 529  | 1394  | 1.413989 | 0.340998 | 0.340998 | 22.15213 |
| tur | HIV_INTERACTION_CATEGORY | env:Envelope surface glycoprotein gp120 downregulates    | 7  | 0.969529 | 0.002132 | ENSG00000007312, | 41  | 49   | 1394  | 4.857143 | 0.08962  | 0.08962  | 1.976657 |
| tur | INTERPRO                 | IPR003599:Immunoglobulin subtype                         | 22 | 3.047091 | 4.97E-04 | ENSG00000069122, | 473 | 330  | 16659 | 2.347992 | 0.325358 | 0.325358 | 0.759725 |
| tur | INTERPRO                 | IPR010007:Sperm associated with nucleus, X chromosom     | 4  | 0.554017 | 0.001671 | ENSG00000203923, | 473 | 9    | 16659 | 15.65328 | 0.733688 | 0.483946 | 2.531164 |
| tur | INTERPRO                 | IPR003267:Small proline-rich                             | 5  | 0.692521 | 0.005018 | ENSG00000163216, | 473 | 25   | 16659 | 7.043975 | 0.981294 | 0.734545 | 7.420243 |
| tur | INTERPRO                 | IPR002049:EGF-like, laminin                              | 6  | 0.831025 | 0.00578  | ENSG00000009128, | 473 | 41   | 16659 | 5.154128 | 0.989799 | 0.682194 | 8.501582 |
| tur | INTERPRO                 | IPR008266:Tyrosine protein kinase, active site           | 9  | 1.246537 | 0.006265 | ENSG00000171094, | 473 | 97   | 16659 | 3.267823 | 0.993065 | 0.629989 | 9.183143 |
| tur | INTERPRO                 | IPR000233:Cadherin cytoplasmic region                    | 4  | 0.554017 | 0.015624 | ENSG00000140937, | 473 | 19   | 16659 | 7.41471  | 0.999996 | 0.874576 | 21.44463 |
| tur | INTERPRO                 | IPR007110:Immunoglobulin-like                            | 24 | 3.3241   | 0.016242 | ENSG00000069122, | 473 | 501  | 16659 | 1.68718  | 0.999998 | 0.842836 | 22.19743 |
| tur | INTERPRO                 | IPR002190:MAGE protein                                   | 5  | 0.692521 | 0.016639 | ENSG00000176746, | 473 | 35   | 16659 | 5.03141  | 0.999998 | 0.809682 | 22.67715 |
| tur | INTERPRO                 | IPR013106:Immunoglobulin V-set                           | 14 | 1.939058 | 0.025647 | ENSG00000160588, | 473 | 249  | 16659 | 1.980234 | 1        | 0.898068 | 32.84848 |
| tur | INTERPRO                 | IPR010294:ADAM-TS Spacer 1                               | 4  | 0.554017 | 0.026276 | ENSG00000138316, | 473 | 23   | 16659 | 6.125195 | 1        | 0.878307 | 33.51067 |
| tur | INTERPRO                 | IPR013273:Peptidase M12B, ADAM-TS                        | 4  | 0.554017 | 0.029414 | ENSG00000138316, | 473 | 24   | 16659 | 5.869979 | 1        | 0.883153 | 36.72022 |
| tur | INTERPRO                 | IPR001818:Peptidase M10A and M12B, matrixin and adar     | 5  | 0.692521 | 0.032903 | ENSG00000167346, | 473 | 43   | 16659 | 4.095334 | 1        | 0.889785 | 40.11778 |
| tur | INTERPRO                 | IPR011992:EF-Hand type                                   | 13 | 1.800554 | 0.037129 | ENSG00000111245, | 473 | 236  | 16659 | 1.940078 | 1        | 0.89996  | 44.0059  |
| tur | INTERPRO                 | IPR001245:Tyrosine protein kinase                        | 8  | 1.108033 | 0.050638 | ENSG00000171094, | 473 | 118  | 16659 | 2.387788 | 1        | 0.946925 | 54.90903 |
| tur | INTERPRO                 | IPR006025:Peptidase M, neutral zinc metallopeptidases, z | 7  | 0.969529 | 0.055144 | ENSG00000072657, | 473 | 96   | 16659 | 2.568116 | 1        | 0.949771 | 58.07959 |
| tur | INTERPRO                 | IPR017338:Fibroblast growth factor, 15/19/21             | 2  | 0.277008 | 0.055865 | ENSG00000105550, | 473 | 2    | 16659 | 35.21987 | 1        | 0.941689 | 58.56738 |
| tur | INTERPRO                 | IPR013151:Immunoglobulin                                 | 11 | 1.523546 | 0.062394 | ENSG00000162706, | 473 | 202  | 16659 | 1.917914 | 1        | 0.950097 | 62.74799 |
| tur | INTERPRO                 | IPR008085:Thrombospondin, type 1 repeat, subgroup        | 3  | 0.415512 | 0.06595  | ENSG00000126759, | 473 | 15   | 16659 | 7.043975 | 1        | 0.950119 | 64.85559 |
| tur | INTERPRO                 | IPR008211:Laminin, N-terminal                            | 3  | 0.415512 | 0.073998 | ENSG00000009128, | 473 | 16   | 16659 | 6.603726 | 1        | 0.959262 | 69.22106 |
| tur | INTERPRO                 | IPR000342:Regulator of G protein signalling              | 4  | 0.554017 | 0.075903 | ENSG00000150681, | 473 | 35   | 16659 | 4.025128 | 1        | 0.955931 | 70.17734 |
| tur | INTERPRO                 | IPR002110:Ankyrin                                        | 12 | 1.66205  | 0.077117 | ENSG00000165887, | 473 | 238  | 16659 | 1.775792 | 1        | 0.951338 | 70.77229 |
| tur | INTERPRO                 | IPR000169:Peptidase, cysteine peptidase active site      | 4  | 0.554017 | 0.081138 | ENSG00000136943, | 473 | 36   | 16659 | 3.913319 | 1        | 0.952283 | 72.66459 |
| tur | INTERPRO                 | IPR001699:Transcription factor, T-box                    | 3  | 0.415512 | 0.08234  | ENSG00000092607, | 473 | 17   | 16659 | 6.215272 | 1        | 0.947931 | 73.20739 |
| tur | INTERPRO                 | IPR018186:Transcription factor, T-box, conserved site    | 3  | 0.415512 | 0.08234  | ENSG00000092607, | 473 | 17   | 16659 | 6.215272 | 1        | 0.947931 | 73.20739 |
| tur | INTERPRO                 | IPR011657:Na dependent nucleoside transporter, C-termi   | 2  | 0.277008 | 0.082618 | ENSG00000197506, | 473 | 3    | 16659 | 23.47992 | 1        | 0.941694 | 73.33165 |
| tur | INTERPRO                 | IPR011642:Nucleoside recognition                         | 2  | 0.277008 | 0.082618 | ENSG00000197506, | 473 | 3    | 16659 | 23.47992 | 1        | 0.941694 | 73.33165 |
| tur | INTERPRO                 | IPR002455:GPCR, family 3, gamma-aminobutyric acid rec    | 2  | 0.277008 | 0.082618 | ENSG00000175697, | 473 | 3    | 16659 | 23.47992 | 1        | 0.941694 | 73.33165 |
| tur | INTERPRO                 | IPR018270:Concentrative nucleoside transporter, metazo   | 2  | 0.277008 | 0.082618 | ENSG00000197506, | 473 | 3    | 16659 | 23.47992 | 1        | 0.941694 | 73.33165 |
| tur | INTERPRO                 | IPR002668:Na dependent nucleoside transporter            | 2  | 0.277008 | 0.082618 | ENSG00000197506, | 473 | 3    | 16659 | 23.47992 | 1        | 0.941694 | 73.33165 |
| tur | INTERPRO                 | IPR008276:Concentrative nucleoside transporter           | 2  | 0.277008 | 0.082618 | ENSG00000197506, | 473 | 3    | 16659 | 23.47992 | 1        | 0.941694 | 73.33165 |
| tur | INTERPRO                 | IPR017948:Transforming growth factor beta, conserved s   | 4  | 0.554017 | 0.086526 | ENSG00000143768, | 473 | 37   | 16659 | 3.807554 | 1        | 0.942927 | 75.02046 |
| tur | INTERPRO                 | IPR001839:Transforming growth factor beta                | 4  | 0.554017 | 0.086526 | ENSG00000143768, | 473 | 37   | 16659 | 3.807554 | 1        | 0.942927 | 75.02046 |
| tur | INTERPRO                 | IPR005821:Ion transport                                  | 7  | 0.969529 | 0.092499 | ENSG00000136531, | 473 | 110  | 16659 | 2.241265 | 1        | 0.94781  | 77.41003 |

|     |                 |                                                          |     |          |          |                  |     |       |       |          |          |          |          |
|-----|-----------------|----------------------------------------------------------|-----|----------|----------|------------------|-----|-------|-------|----------|----------|----------|----------|
| tur | INTERPRO        | IPR001590:Peptidase M12B, ADAM/reprolysin                | 4   | 0.554017 | 0.097737 | ENSG00000138316, | 473 | 39    | 16659 | 3.612295 | 1        | 0.950861 | 79.32803 |
| tur | INTERPRO        | IPR002870:Peptidase M12B, propeptide                     | 4   | 0.554017 | 0.097737 | ENSG00000138316, | 473 | 39    | 16659 | 3.612295 | 1        | 0.950861 | 79.32803 |
| tur | INTERPRO        | IPR010909:PLAC                                           | 3   | 0.415512 | 0.099816 | ENSG00000138316, | 473 | 19    | 16659 | 5.561033 | 1        | 0.94873  | 80.04603 |
| tur | KEGG_PATHWAY    | hsa04080:Neuroactive ligand-receptor interaction         | 13  | 1.800554 | 0.021411 | ENSG00000124089, | 125 | 256   | 5085  | 2.065781 | 0.909503 | 0.909503 | 21.72504 |
| tur | KEGG_PATHWAY    | hsa04510:Focal adhesion                                  | 11  | 1.523546 | 0.024107 | ENSG00000111245, | 125 | 201   | 5085  | 2.226269 | 0.933376 | 0.741884 | 24.1314  |
| tur | KEGG_PATHWAY    | hsa05414:Dilated cardiomyopathy                          | 7   | 0.969529 | 0.024133 | ENSG00000111245, | 125 | 92    | 5085  | 3.095217 | 0.933567 | 0.594995 | 24.15361 |
| tur | KEGG_PATHWAY    | hsa05340:Primary immunodeficiency                        | 4   | 0.554017 | 0.052593 | ENSG00000159958, | 125 | 35    | 5085  | 4.649143 | 0.997514 | 0.7767   | 45.74233 |
| tur | KEGG_PATHWAY    | hsa05410:Hypertrophic cardiomyopathy (HCM)               | 6   | 0.831025 | 0.055595 | ENSG00000111245, | 125 | 85    | 5085  | 2.871529 | 0.998252 | 0.719121 | 47.6561  |
| tur | KEGG_PATHWAY    | hsa04640:Hematopoietic cell lineage                      | 6   | 0.831025 | 0.057922 | ENSG00000105383, | 125 | 86    | 5085  | 2.83814  | 0.998671 | 0.668405 | 49.09752 |
| tur | KEGG_PATHWAY    | hsa04912:GnRH signaling pathway                          | 6   | 0.831025 | 0.090134 | ENSG00000138308, | 125 | 98    | 5085  | 2.490612 | 0.999972 | 0.776386 | 65.6645  |
| tur | KEGG_PATHWAY    | hsa04916:Melanogenesis                                   | 6   | 0.831025 | 0.093168 | ENSG00000070808, | 125 | 99    | 5085  | 2.465455 | 0.999981 | 0.742556 | 66.93835 |
| tur | OMIM_DISEASE    | Genome-wide association analysis of susceptibility and c | 5   | 0.692521 | 0.022811 | ENSG00000162779, | 107 | 38    | 3671  | 4.514265 | 0.990544 | 0.990544 | 25.15042 |
| tur | OMIM_DISEASE    | Genome-wide association to body mass index and waist     | 3   | 0.415512 | 0.045141 | ENSG00000162706, | 107 | 12    | 3671  | 8.577103 | 0.999911 | 0.990585 | 44.0053  |
| tur | PIR_SUPERFAMILY | PIRSF005491:tumor associated protein MAGE                | 5   | 0.692521 | 0.003112 | ENSG00000176746, | 222 | 21    | 7396  | 7.932218 | 0.505561 | 0.505561 | 3.905975 |
| tur | PIR_SUPERFAMILY | PIRSF002504:cadherin                                     | 4   | 0.554017 | 0.020614 | ENSG00000140937, | 222 | 20    | 7396  | 6.663063 | 0.990972 | 0.904986 | 23.37867 |
| tur | PIR_SUPERFAMILY | PIRSF005770:regulator of G protein signaling, RGS4 type  | 3   | 0.415512 | 0.055832 | ENSG00000150681, | 222 | 13    | 7396  | 7.68815  | 0.999998 | 0.986805 | 52.02441 |
| tur | PIR_SUPERFAMILY | PIRSF037961:FGF-19_FGF-21                                | 2   | 0.277008 | 0.058873 | ENSG00000105550, | 222 | 2     | 7396  | 33.31532 | 0.999999 | 0.967557 | 53.96318 |
| tur | PIR_SUPERFAMILY | PIRSF037059:relaxin                                      | 2   | 0.277008 | 0.058873 | ENSG00000107014, | 222 | 2     | 7396  | 33.31532 | 0.999999 | 0.967557 | 53.96318 |
| tur | PIR_SUPERFAMILY | PIRSF500319:relaxin precursor                            | 2   | 0.277008 | 0.058873 | ENSG00000107014, | 222 | 2     | 7396  | 33.31532 | 0.999999 | 0.967557 | 53.96318 |
| tur | PIR_SUPERFAMILY | PIRSF037961:fibroblast growth factor, 15/19/21 types     | 2   | 0.277008 | 0.058873 | ENSG00000105550, | 222 | 2     | 7396  | 33.31532 | 0.999999 | 0.967557 | 53.96318 |
| tur | PIR_SUPERFAMILY | PIRSF002413:folate-binding protein                       | 2   | 0.277008 | 0.087003 | ENSG00000110195, | 222 | 3     | 7396  | 22.21021 | 1        | 0.983661 | 68.76631 |
| tur | PIR_SUPERFAMILY | PIRSF002337:Actin                                        | 3   | 0.415512 | 0.090108 | ENSG00000117148, | 222 | 17    | 7396  | 5.879173 | 1        | 0.971471 | 70.09761 |
| tur | SMART           | SM00409:IG                                               | 22  | 3.047091 | 0.001043 | ENSG00000069122, | 276 | 330   | 9079  | 2.192995 | 0.168632 | 0.168632 | 1.273431 |
| tur | SMART           | SM00180:EGF_Lam                                          | 6   | 0.831025 | 0.00755  | ENSG00000091128, | 276 | 41    | 9079  | 4.813892 | 0.738527 | 0.488655 | 8.888666 |
| tur | SMART           | SM00219:TyrKc                                            | 8   | 1.108033 | 0.066853 | ENSG00000171094, | 276 | 118   | 9079  | 2.230165 | 0.999995 | 0.983133 | 57.25387 |
| tur | SMART           | SM00136:LamNT                                            | 3   | 0.415512 | 0.083009 | ENSG00000091128, | 276 | 16    | 9079  | 6.167799 | 1        | 0.97839  | 65.50667 |
| tur | SMART           | SM00315:RGS                                              | 4   | 0.554017 | 0.088476 | ENSG00000150681, | 276 | 35    | 9079  | 3.75942  | 1        | 0.962347 | 67.9493  |
| tur | SMART           | SM00425:TBOX                                             | 3   | 0.415512 | 0.092258 | ENSG00000092607, | 276 | 17    | 9079  | 5.804987 | 1        | 0.94247  | 69.54496 |
| tur | SP_PIR_KEYWORDS | signal                                                   | 151 | 20.91413 | 9.70E-09 | ENSG00000183396, | 575 | 3250  | 19235 | 1.554239 | 4.07E-06 | 4.07E-06 | 1.36E-05 |
| tur | SP_PIR_KEYWORDS | Secreted                                                 | 88  | 12.18837 | 3.11E-07 | ENSG00000066468, | 575 | 1689  | 19235 | 1.74292  | 1.30E-04 | 6.52E-05 | 4.37E-04 |
| tur | SP_PIR_KEYWORDS | glycoprotein                                             | 171 | 23.68421 | 3.15E-05 | ENSG00000146013, | 575 | 4318  | 19235 | 1.324762 | 0.013111 | 0.004389 | 0.044219 |
| tur | SP_PIR_KEYWORDS | cleavage on pair of basic residues                       | 22  | 3.047091 | 6.88E-05 | ENSG00000140937, | 575 | 271   | 19235 | 2.715675 | 0.0284   | 0.007177 | 0.096511 |
| tur | SP_PIR_KEYWORDS | polymorphism                                             | 382 | 52.90859 | 8.80E-04 | ENSG00000183396, | 575 | 11550 | 19235 | 1.106384 | 0.308543 | 0.071134 | 1.228886 |
| tur | SP_PIR_KEYWORDS | amidation                                                | 7   | 0.969529 | 0.001852 | ENSG00000118702, | 575 | 44    | 19235 | 5.321937 | 0.540045 | 0.121411 | 2.569182 |
| tur | SP_PIR_KEYWORDS | hormone                                                  | 9   | 1.246537 | 0.004434 | ENSG00000118702, | 575 | 87    | 19235 | 3.46057  | 0.844626 | 0.233552 | 6.049276 |
| tur | SP_PIR_KEYWORDS | disulfide bond                                           | 111 | 15.37396 | 0.005157 | ENSG00000123843, | 575 | 2924  | 19235 | 1.269901 | 0.885426 | 0.237243 | 7.003506 |
| tur | SP_PIR_KEYWORDS | extracellular matrix                                     | 16  | 2.216066 | 0.006021 | ENSG00000167346, | 575 | 241   | 19235 | 2.220891 | 0.920382 | 0.245098 | 8.131016 |
| tur | SP_PIR_KEYWORDS | ionic channel                                            | 19  | 2.631579 | 0.007366 | ENSG00000136531, | 575 | 318   | 19235 | 1.998715 | 0.954846 | 0.266383 | 9.860777 |
| tur | SP_PIR_KEYWORDS | Immunoglobulin domain                                    | 25  | 3.462604 | 0.007771 | ENSG00000069122, | 575 | 470   | 19235 | 1.779371 | 0.961953 | 0.257087 | 10.37662 |
| tur | SP_PIR_KEYWORDS | laminin egf-like domain                                  | 5   | 0.692521 | 0.01162  | ENSG00000091128, | 575 | 30    | 19235 | 5.575362 | 0.992533 | 0.335087 | 15.13624 |
| tur | SP_PIR_KEYWORDS | growth factor                                            | 10  | 1.385042 | 0.016779 | ENSG00000105894, | 575 | 131   | 19235 | 2.553601 | 0.999167 | 0.420385 | 21.14934 |
| tur | SP_PIR_KEYWORDS | tyrosine-protein kinase                                  | 9   | 1.246537 | 0.018115 | ENSG00000171094, | 575 | 111   | 19235 | 2.712338 | 0.999529 | 0.421387 | 22.64033 |
| tur | SP_PIR_KEYWORDS | chloride channel                                         | 6   | 0.831025 | 0.02548  | ENSG00000151572, | 575 | 56    | 19235 | 3.584161 | 0.99998  | 0.513711 | 30.40143 |
| tur | SP_PIR_KEYWORDS | tumor antigen                                            | 5   | 0.692521 | 0.025987 | ENSG00000176746, | 575 | 38    | 19235 | 4.401602 | 0.999984 | 0.498183 | 30.90817 |
| tur | SP_PIR_KEYWORDS | lipoprotein                                              | 29  | 4.01662  | 0.029885 | ENSG00000146013, | 575 | 642   | 19235 | 1.51108  | 0.999997 | 0.526595 | 34.69151 |
| tur | SP_PIR_KEYWORDS | keratinization                                           | 5   | 0.692521 | 0.030721 | ENSG00000163216, | 575 | 40    | 19235 | 4.181522 | 0.999998 | 0.516317 | 35.47727 |
| tur | SP_PIR_KEYWORDS | muscle protein                                           | 6   | 0.831025 | 0.033105 | ENSG00000111245, | 575 | 60    | 19235 | 3.345217 | 0.999999 | 0.524034 | 37.67058 |
| tur | SP_PIR_KEYWORDS | cardiac muscle                                           | 4   | 0.554017 | 0.033594 | ENSG00000165887, | 575 | 24    | 19235 | 5.575362 | 0.999999 | 0.511237 | 38.11137 |

|     |                 |                                                |     |          |          |                   |     |       |       |          |          |          |          |
|-----|-----------------|------------------------------------------------|-----|----------|----------|-------------------|-----|-------|-------|----------|----------|----------|----------|
| tur | SP_PIR_KEYWORDS | heart                                          | 4   | 0.554017 | 0.033594 | ENSG00000165887,  | 575 | 24    | 19235 | 5.575362 | 0.999999 | 0.511237 | 38.11137 |
| tur | SP_PIR_KEYWORDS | duplication                                    | 13  | 1.800554 | 0.041139 | ENSG000000064300, | 575 | 228   | 19235 | 1.907361 | 1        | 0.569754 | 44.76495 |
| tur | SP_PIR_KEYWORDS | developmental protein                          | 33  | 4.570637 | 0.042185 | ENSG000000064300, | 575 | 779   | 19235 | 1.417101 | 1        | 0.559955 | 45.40537 |
| tur | SP_PIR_KEYWORDS | cytokine                                       | 11  | 1.523546 | 0.045379 | ENSG00000105894,  | 575 | 181   | 19235 | 2.033005 | 1        | 0.570886 | 47.90672 |
| tur | SP_PIR_KEYWORDS | transmembrane protein                          | 28  | 3.878116 | 0.047421 | ENSG000000064300, | 575 | 642   | 19235 | 1.458973 | 1        | 0.571797 | 49.44948 |
| tur | SP_PIR_KEYWORDS | muscle contraction                             | 3   | 0.415512 | 0.048136 | ENSG000000111245, | 575 | 12    | 19235 | 8.363043 | 1        | 0.562564 | 49.98005 |
| tur | SP_PIR_KEYWORDS | tyrosine-specific protein kinase               | 5   | 0.692521 | 0.054431 | ENSG000000066468, | 575 | 48    | 19235 | 3.484601 | 1        | 0.594224 | 54.43004 |
| tur | SP_PIR_KEYWORDS | Cardiomyopathy                                 | 5   | 0.692521 | 0.054431 | ENSG000000069431, | 575 | 48    | 19235 | 3.484601 | 1        | 0.594224 | 54.43004 |
| tur | SP_PIR_KEYWORDS | differentiation                                | 21  | 2.908587 | 0.06036  | ENSG000000112559, | 575 | 460   | 19235 | 1.527164 | 1        | 0.619458 | 58.2824  |
| tur | SP_PIR_KEYWORDS | chloride                                       | 6   | 0.831025 | 0.073311 | ENSG000000151572, | 575 | 75    | 19235 | 2.676174 | 1        | 0.679967 | 65.66927 |
| tur | SP_PIR_KEYWORDS | potassium channel                              | 6   | 0.831025 | 0.083569 | ENSG000000162687, | 575 | 78    | 19235 | 2.573244 | 1        | 0.716596 | 70.63739 |
| tur | SP_PIR_KEYWORDS | ovary                                          | 2   | 0.277008 | 0.086884 | ENSG000000107014, | 575 | 3     | 19235 | 22.30145 | 1        | 0.719016 | 72.09396 |
| tur | SP_PIR_KEYWORDS | zymogen                                        | 11  | 1.523546 | 0.089787 | ENSG000000197253, | 575 | 206   | 19235 | 1.786281 | 1        | 0.719605 | 73.31446 |
| tur | SP_PIR_KEYWORDS | collagen degradation                           | 3   | 0.415512 | 0.090016 | ENSG000000167346, | 575 | 17    | 19235 | 5.903325 | 1        | 0.709199 | 73.40865 |
| tur | SP_PIR_KEYWORDS | Signal transduction inhibitor                  | 4   | 0.554017 | 0.091485 | ENSG000000150681, | 575 | 36    | 19235 | 3.716908 | 1        | 0.704236 | 74.00493 |
| tur | SP_PIR_KEYWORDS | ion transport                                  | 24  | 3.3241   | 0.098913 | ENSG000000136531, | 575 | 578   | 19235 | 1.389018 | 1        | 0.722943 | 76.83531 |
| tur | UP_SEQ_FEATURE  | signal peptide                                 | 151 | 20.91413 | 1.17E-08 | ENSG000000183396, | 573 | 3250  | 19113 | 1.549772 | 1.76E-05 | 1.76E-05 | 1.95E-05 |
| tur | UP_SEQ_FEATURE  | glycosylation site:N-linked (GlcNAc...)        | 164 | 22.71468 | 4.86E-05 | ENSG000000146013, | 573 | 4129  | 19113 | 1.32487  | 0.070378 | 0.035831 | 0.080757 |
| tur | UP_SEQ_FEATURE  | sequence variant                               | 398 | 55.12465 | 4.14E-04 | ENSG000000183396, | 573 | 11992 | 19113 | 1.107046 | 0.462887 | 0.187129 | 0.685717 |
| tur | UP_SEQ_FEATURE  | domain:Ig-like V-type                          | 11  | 1.523546 | 0.004119 | ENSG000000160588, | 573 | 124   | 19113 | 2.959002 | 0.997961 | 0.787514 | 6.628767 |
| tur | UP_SEQ_FEATURE  | domain:Laminin EGF-like 1                      | 5   | 0.692521 | 0.007031 | ENSG000000091128, | 573 | 26    | 19113 | 6.414619 | 0.999975 | 0.879738 | 11.06287 |
| tur | UP_SEQ_FEATURE  | domain:Laminin EGF-like 2                      | 5   | 0.692521 | 0.008062 | ENSG000000091128, | 573 | 27    | 19113 | 6.177041 | 0.999995 | 0.867997 | 12.58482 |
| tur | UP_SEQ_FEATURE  | topological domain:Extracellular               | 103 | 14.26593 | 0.008463 | ENSG000000183396, | 573 | 2719  | 19113 | 1.263579 | 0.999997 | 0.838365 | 13.17053 |
| tur | UP_SEQ_FEATURE  | disulfide bond                                 | 105 | 14.54294 | 0.012515 | ENSG000000123843, | 573 | 2819  | 19113 | 1.24242  | 1        | 0.90585  | 18.88185 |
| tur | UP_SEQ_FEATURE  | domain:MAGE                                    | 5   | 0.692521 | 0.014692 | ENSG000000176746, | 573 | 32    | 19113 | 5.211878 | 1        | 0.915286 | 21.80338 |
| tur | UP_SEQ_FEATURE  | region of interest:Domain II and I             | 3   | 0.415512 | 0.02221  | ENSG000000050555, | 573 | 8     | 19113 | 12.50851 | 1        | 0.965656 | 31.14865 |
| tur | UP_SEQ_FEATURE  | domain:Laminin EGF-like 3                      | 4   | 0.554017 | 0.026899 | ENSG000000091128, | 573 | 22    | 19113 | 6.064731 | 1        | 0.975785 | 36.43449 |
| tur | UP_SEQ_FEATURE  | domain:Laminin EGF-like 11                     | 3   | 0.415512 | 0.027997 | ENSG000000091128, | 573 | 9     | 19113 | 11.11867 | 1        | 0.971329 | 37.6153  |
| tur | UP_SEQ_FEATURE  | domain:Laminin G-like 5                        | 3   | 0.415512 | 0.027997 | ENSG000000021645, | 573 | 9     | 19113 | 11.11867 | 1        | 0.971329 | 37.6153  |
| tur | UP_SEQ_FEATURE  | domain:Laminin EGF-like 9                      | 3   | 0.415512 | 0.034312 | ENSG000000091128, | 573 | 10    | 19113 | 10.00681 | 1        | 0.982249 | 44.01971 |
| tur | UP_SEQ_FEATURE  | domain:Laminin EGF-like 10                     | 3   | 0.415512 | 0.04112  | ENSG000000091128, | 573 | 11    | 19113 | 9.097097 | 1        | 0.988912 | 50.22869 |
| tur | UP_SEQ_FEATURE  | domain:Laminin EGF-like 8                      | 3   | 0.415512 | 0.04112  | ENSG000000091128, | 573 | 11    | 19113 | 9.097097 | 1        | 0.988912 | 50.22869 |
| tur | UP_SEQ_FEATURE  | domain:TSP type-1 1                            | 5   | 0.692521 | 0.041986 | ENSG000000126759, | 573 | 44    | 19113 | 3.790457 | 1        | 0.986325 | 50.97004 |
| tur | UP_SEQ_FEATURE  | domain:TSP type-1 2                            | 5   | 0.692521 | 0.041986 | ENSG000000126759, | 573 | 44    | 19113 | 3.790457 | 1        | 0.986325 | 50.97004 |
| tur | UP_SEQ_FEATURE  | topological domain:Cytoplasmic                 | 118 | 16.34349 | 0.045013 | ENSG000000183396, | 573 | 3374  | 19113 | 1.166571 | 1        | 0.986671 | 53.48142 |
| tur | UP_SEQ_FEATURE  | domain:Laminin EGF-like 7                      | 3   | 0.415512 | 0.048386 | ENSG000000091128, | 573 | 12    | 19113 | 8.339005 | 1        | 0.987462 | 56.13766 |
| tur | UP_SEQ_FEATURE  | domain:EGF-like 2                              | 7   | 0.969529 | 0.048421 | ENSG000000126218, | 573 | 88    | 19113 | 2.65332  | 1        | 0.984059 | 56.16495 |
| tur | UP_SEQ_FEATURE  | metal ion-binding site:Divalent metal cation 2 | 4   | 0.554017 | 0.050201 | ENSG000000132915, | 573 | 28    | 19113 | 4.765146 | 1        | 0.982904 | 57.5076  |
| tur | UP_SEQ_FEATURE  | metal ion-binding site:Divalent metal cation 1 | 4   | 0.554017 | 0.050201 | ENSG000000132915, | 573 | 28    | 19113 | 4.765146 | 1        | 0.982904 | 57.5076  |
| tur | UP_SEQ_FEATURE  | domain:Laminin EGF-like 6                      | 3   | 0.415512 | 0.056075 | ENSG000000091128, | 573 | 13    | 19113 | 7.697543 | 1        | 0.986846 | 61.6696  |
| tur | UP_SEQ_FEATURE  | domain:Laminin EGF-like 4                      | 3   | 0.415512 | 0.056075 | ENSG000000091128, | 573 | 13    | 19113 | 7.697543 | 1        | 0.986846 | 61.6696  |
| tur | UP_SEQ_FEATURE  | peptide:Relaxin B chain                        | 2   | 0.277008 | 0.05896  | ENSG000000107014, | 573 | 2     | 19113 | 33.35602 | 1        | 0.987011 | 63.57076 |
| tur | UP_SEQ_FEATURE  | peptide:Relaxin A chain                        | 2   | 0.277008 | 0.05896  | ENSG000000107014, | 573 | 2     | 19113 | 33.35602 | 1        | 0.987011 | 63.57076 |
| tur | UP_SEQ_FEATURE  | domain:EF-hand 3                               | 7   | 0.969529 | 0.062865 | ENSG000000111245, | 573 | 94    | 19113 | 2.483959 | 1        | 0.988084 | 66.00259 |
| tur | UP_SEQ_FEATURE  | domain:TSP type-1 4                            | 4   | 0.554017 | 0.06455  | ENSG000000126759, | 573 | 31    | 19113 | 4.304003 | 1        | 0.987154 | 67.00439 |
| tur | UP_SEQ_FEATURE  | domain:Laminin G-like 4                        | 3   | 0.415512 | 0.0726   | ENSG000000021645, | 573 | 15    | 19113 | 6.671204 | 1        | 0.991029 | 71.41834 |
| tur | UP_SEQ_FEATURE  | site:Stutter                                   | 4   | 0.554017 | 0.075045 | ENSG000000006059, | 573 | 33    | 19113 | 4.043154 | 1        | 0.990756 | 72.64526 |
| tur | UP_SEQ_FEATURE  | domain:RGS                                     | 4   | 0.554017 | 0.075045 | ENSG000000150681, | 573 | 33    | 19113 | 4.043154 | 1        | 0.990756 | 72.64526 |

|        |                |                                                          |       |          |          |                  |            |          |           |            |           |           |          |
|--------|----------------|----------------------------------------------------------|-------|----------|----------|------------------|------------|----------|-----------|------------|-----------|-----------|----------|
| tur    | UP_SEQ_FEATURE | DNA-binding region:T-box                                 | 3     | 0.415512 | 0.081376 | ENSG00000092607, | 573        | 16       | 19113     | 6.254254   | 1         | 0.992554  | 75.5956  |
| tur    | UP_SEQ_FEATURE | domain:Laminin N-terminal                                | 3     | 0.415512 | 0.081376 | ENSG00000009128, | 573        | 16       | 19113     | 6.254254   | 1         | 0.992554  | 75.5956  |
| tur    | UP_SEQ_FEATURE | repeat:ANK 1                                             | 12    | 1.66205  | 0.087836 | ENSG00000165887, | 573        | 231      | 19113     | 1.73278    | 1         | 0.99397   | 78.2958  |
| tur    | UP_SEQ_FEATURE | repeat:ANK 2                                             | 12    | 1.66205  | 0.089227 | ENSG00000165887, | 573        | 232      | 19113     | 1.725311   | 1         | 0.99333   | 78.83925 |
| tur    | UP_SEQ_FEATURE | domain:TSP type-1 3                                      | 4     | 0.554017 | 0.092087 | ENSG00000126759, | 573        | 36       | 19113     | 3.706225   | 1         | 0.993264  | 79.91682 |
| tur    | UP_SEQ_FEATURE | domain:EF-hand 1                                         | 10    | 1.385042 | 0.096947 | ENSG00000111245, | 573        | 182      | 19113     | 1.832748   | 1         | 0.993916  | 81.63028 |
| tur    | UP_SEQ_FEATURE | domain:PH 2                                              | 4     | 0.554017 | 0.098093 | ENSG00000178385, | 573        | 37       | 19113     | 3.606056   | 1         | 0.993255  | 82.01405 |
| tur    | UP_SEQ_FEATURE | repeat:ANK 5                                             | 8     | 1.108033 | 0.098662 | ENSG00000165887, | 573        | 131      | 19113     | 2.037009   | 1         | 0.992345  | 82.20151 |
| yellow | Category       | Term                                                     | Count | %        | PValue   | Genes            | List Total | Pop Hits | Pop Total | Fold Enric | Bonferron | Benjamini | FDR      |
| yellow | GOTERM_BP_FAT  | GO:0003013~circulatory system process                    | 13    | 2.857143 | 2.28E-04 | ENSG00000128917, | 258        | 186      | 13528     | 3.66475    | 0.317386  | 0.317386  | 0.383075 |
| yellow | GOTERM_BP_FAT  | GO:0008015~blood circulation                             | 13    | 2.857143 | 2.28E-04 | ENSG00000128917, | 258        | 186      | 13528     | 3.66475    | 0.317386  | 0.317386  | 0.383075 |
| yellow | GOTERM_BP_FAT  | GO:0006355~regulation of transcription, DNA-dependent    | 51    | 11.20879 | 0.002465 | ENSG00000175322, | 258        | 1773     | 13528     | 1.508257   | 0.983972  | 0.873397  | 4.069755 |
| yellow | GOTERM_BP_FAT  | GO:0045449~regulation of transcription                   | 69    | 15.16484 | 0.002616 | ENSG00000175322, | 258        | 2601     | 13528     | 1.390986   | 0.987578  | 0.768407  | 4.315258 |
| yellow | GOTERM_BP_FAT  | GO:0060341~regulation of cellular localization           | 13    | 2.857143 | 0.002825 | ENSG00000123612, | 258        | 248      | 13528     | 2.748562   | 0.991247  | 0.694125  | 4.6513   |
| yellow | GOTERM_BP_FAT  | GO:0030901~midbrain development                          | 4     | 0.879121 | 0.00316  | ENSG00000186051, | 258        | 16       | 13528     | 13.10853   | 0.995013  | 0.992345  | 5.188989 |
| yellow | GOTERM_BP_FAT  | GO:0051252~regulation of RNA metabolic process           | 51    | 11.20879 | 0.003886 | ENSG00000175322, | 258        | 1813     | 13528     | 1.47498    | 0.998528  | 0.662735  | 6.344982 |
| yellow | GOTERM_BP_FAT  | GO:0051705~behavioral interaction between organisms      | 5     | 1.098901 | 0.004194 | ENSG00000126010, | 258        | 35       | 13528     | 7.490587   | 0.999123  | 0.63419   | 6.83154  |
| yellow | GOTERM_BP_FAT  | GO:0002285~lymphocyte activation during immune resp      | 4     | 0.879121 | 0.004477 | ENSG00000197943, | 258        | 18       | 13528     | 11.65202   | 0.999456  | 0.609163  | 7.27648  |
| yellow | GOTERM_BP_FAT  | GO:0002263~cell activation during immune response        | 5     | 1.098901 | 0.004649 | ENSG00000137462, | 258        | 36       | 13528     | 7.282515   | 0.999592  | 0.579879  | 7.54563  |
| yellow | GOTERM_BP_FAT  | GO:0002366~leukocyte activation during immune respon     | 5     | 1.098901 | 0.004649 | ENSG00000137462, | 258        | 36       | 13528     | 7.282515   | 0.999592  | 0.579879  | 7.54563  |
| yellow | GOTERM_BP_FAT  | GO:0050801~ion homeostasis                               | 17    | 3.736264 | 0.00516  | ENSG00000172005, | 258        | 409      | 13528     | 2.179413   | 0.999828  | 0.579588  | 8.341681 |
| yellow | GOTERM_BP_FAT  | GO:0035176~social behavior                               | 4     | 0.879121 | 0.005243 | ENSG00000126010, | 258        | 19       | 13528     | 11.03876   | 0.99985   | 0.550848  | 8.469784 |
| yellow | GOTERM_BP_FAT  | GO:0007586~digestion                                     | 7     | 1.538462 | 0.007702 | ENSG00000198788, | 258        | 91       | 13528     | 4.033393   | 0.999998  | 0.660121  | 12.20565 |
| yellow | GOTERM_BP_FAT  | GO:0007610~behavior                                      | 18    | 3.956044 | 0.008349 | ENSG00000126010, | 258        | 469      | 13528     | 2.012396   | 0.999999  | 0.660485  | 13.16504 |
| yellow | GOTERM_BP_FAT  | GO:0008544~epidermis development                         | 10    | 2.197802 | 0.008616 | ENSG00000158813, | 258        | 184      | 13528     | 2.84968    | 0.999999  | 0.644872  | 13.55762 |
| yellow | GOTERM_BP_FAT  | GO:0042438~melanin biosynthetic process                  | 3     | 0.659341 | 0.009334 | ENSG00000123447, | 258        | 8        | 13528     | 19.66279   | 1         | 0.649077  | 14.60604 |
| yellow | GOTERM_BP_FAT  | GO:0042756~drinking behavior                             | 3     | 0.659341 | 0.009334 | ENSG00000143839, | 258        | 8        | 13528     | 19.66279   | 1         | 0.649077  | 14.60604 |
| yellow | GOTERM_BP_FAT  | GO:0006582~melanin metabolic process                     | 3     | 0.659341 | 0.011851 | ENSG00000123447, | 258        | 9        | 13528     | 17.47804   | 1         | 0.712951  | 18.18704 |
| yellow | GOTERM_BP_FAT  | GO:0008217~regulation of blood pressure                  | 7     | 1.538462 | 0.011972 | ENSG00000143839, | 258        | 100      | 13528     | 3.670388   | 1         | 0.694783  | 18.3553  |
| yellow | GOTERM_BP_FAT  | GO:0006873~cellular ion homeostasis                      | 15    | 3.296703 | 0.012322 | ENSG00000172005, | 258        | 374      | 13528     | 2.102972   | 1         | 0.684548  | 18.84056 |
| yellow | GOTERM_BP_FAT  | GO:0021700~developmental maturation                      | 7     | 1.538462 | 0.012532 | ENSG00000143839, | 258        | 101      | 13528     | 3.634047   | 1         | 0.671028  | 19.1308  |
| yellow | GOTERM_BP_FAT  | GO:0007398~ectoderm development                          | 10    | 2.197802 | 0.013882 | ENSG00000158813, | 258        | 199      | 13528     | 2.63488    | 1         | 0.689869  | 20.97212 |
| yellow | GOTERM_BP_FAT  | GO:0048469~cell maturation                               | 6     | 1.318681 | 0.013966 | ENSG00000143839, | 258        | 75       | 13528     | 4.194729   | 1         | 0.674308  | 21.08536 |
| yellow | GOTERM_BP_FAT  | GO:0055082~cellular chemical homeostasis                 | 15    | 3.296703 | 0.013979 | ENSG00000172005, | 258        | 380      | 13528     | 2.069767   | 1         | 0.657622  | 21.10331 |
| yellow | GOTERM_BP_FAT  | GO:0044057~regulation of system process                  | 13    | 2.857143 | 0.015196 | ENSG00000117013, | 258        | 309      | 13528     | 2.205966   | 1         | 0.672146  | 22.72709 |
| yellow | GOTERM_BP_FAT  | GO:0045087~innate immune response                        | 8     | 1.758242 | 0.01628  | ENSG00000115607, | 258        | 138      | 13528     | 3.039658   | 1         | 0.681947  | 24.14589 |
| yellow | GOTERM_BP_FAT  | GO:0007411~axon guidance                                 | 7     | 1.538462 | 0.016282 | ENSG00000162068, | 258        | 107      | 13528     | 3.430269   | 1         | 0.667094  | 24.14933 |
| yellow | GOTERM_BP_FAT  | GO:0042592~homeostatic process                           | 24    | 5.274725 | 0.016321 | ENSG00000172005, | 258        | 751      | 13528     | 1.675657   | 1         | 0.65358   | 24.1991  |
| yellow | GOTERM_BP_FAT  | GO:0007625~grooming behavior                             | 3     | 0.659341 | 0.017659 | ENSG00000101200, | 258        | 11       | 13528     | 14.30021   | 1         | 0.668893  | 25.91718 |
| yellow | GOTERM_BP_FAT  | GO:0000904~cell morphogenesis involved in differentiati  | 11    | 2.417582 | 0.018352 | ENSG00000162068, | 258        | 244      | 13528     | 2.363833   | 1         | 0.66979   | 26.79163 |
| yellow | GOTERM_BP_FAT  | GO:0048878~chemical homeostasis                          | 18    | 3.956044 | 0.018371 | ENSG00000172005, | 258        | 512      | 13528     | 1.843387   | 1         | 0.657326  | 26.81635 |
| yellow | GOTERM_BP_FAT  | GO:0019228~regulation of action potential in neuron      | 5     | 1.098901 | 0.019156 | ENSG00000172005, | 258        | 54       | 13528     | 4.85501    | 1         | 0.660387  | 27.79558 |
| yellow | GOTERM_BP_FAT  | GO:0051048~negative regulation of secretion              | 5     | 1.098901 | 0.02036  | ENSG00000123612, | 258        | 55       | 13528     | 4.766737   | 1         | 0.67091   | 29.27226 |
| yellow | GOTERM_BP_FAT  | GO:0030182~neuron differentiation                        | 16    | 3.516484 | 0.02052  | ENSG00000162068, | 258        | 438      | 13528     | 1.915401   | 1         | 0.662194  | 29.46751 |
| yellow | GOTERM_BP_FAT  | GO:0007187~G-protein signaling, coupled to cyclic nucle  | 7     | 1.538462 | 0.022399 | ENSG00000143199, | 258        | 115      | 13528     | 3.191641   | 1         | 0.683318  | 31.71126 |
| yellow | GOTERM_BP_FAT  | GO:0007166~cell surface receptor linked signal transduct | 48    | 10.54945 | 0.022845 | ENSG00000126010, | 258        | 1856     | 13528     | 1.356055   | 1         | 0.6797    | 32.23343 |
| yellow | GOTERM_BP_FAT  | GO:0006350~transcription                                 | 53    | 11.64835 | 0.024796 | ENSG00000175322, | 258        | 2101     | 13528     | 1.322707   | 1         | 0.699296  | 34.4762  |
| yellow | GOTERM_BP_FAT  | GO:0019229~regulation of vasoconstriction                | 4     | 0.879121 | 0.02629  | ENSG00000135643, | 258        | 34       | 13528     | 6.168719   | 1         | 0.710497  | 36.14607 |

|        |               |                                                         |    |          |          |                  |     |      |       |          |   |          |          |
|--------|---------------|---------------------------------------------------------|----|----------|----------|------------------|-----|------|-------|----------|---|----------|----------|
| yellow | GOTERM_BP_FAT | GO:0055074~calcium ion homeostasis                      | 9  | 1.978022 | 0.027291 | ENSG00000108702, | 258 | 188  | 13528 | 2.510143 | 1 | 0.714255 | 37.24255 |
| yellow | GOTERM_BP_FAT | GO:0046632~alpha-beta T cell differentiation            | 3  | 0.659341 | 0.028147 | ENSG00000113302, | 258 | 14   | 13528 | 11.23588 | 1 | 0.715914 | 38.16544 |
| yellow | GOTERM_BP_FAT | GO:0007617~mating behavior                              | 3  | 0.659341 | 0.028147 | ENSG00000101200, | 258 | 14   | 13528 | 11.23588 | 1 | 0.715914 | 38.16544 |
| yellow | GOTERM_BP_FAT | GO:0031016~pancreas development                         | 4  | 0.879121 | 0.028362 | ENSG0000016082,  | 258 | 35   | 13528 | 5.99247  | 1 | 0.70937  | 38.3952  |
| yellow | GOTERM_BP_FAT | GO:0048666~neuron development                           | 13 | 2.857143 | 0.028835 | ENSG00000162068, | 258 | 339  | 13528 | 2.010748 | 1 | 0.706306 | 38.89856 |
| yellow | GOTERM_BP_FAT | GO:0051960~regulation of nervous system development     | 9  | 1.978022 | 0.030355 | ENSG00000148704, | 258 | 192  | 13528 | 2.457849 | 1 | 0.716151 | 40.48863 |
| yellow | GOTERM_BP_FAT | GO:0007409~axonogenesis                                 | 9  | 1.978022 | 0.031229 | ENSG00000162068, | 258 | 193  | 13528 | 2.445114 | 1 | 0.717843 | 41.38535 |
| yellow | GOTERM_BP_FAT | GO:0021517~ventral spinal cord development              | 3  | 0.659341 | 0.032077 | ENSG0000016082,  | 258 | 15   | 13528 | 10.48682 | 1 | 0.719161 | 42.2431  |
| yellow | GOTERM_BP_FAT | GO:0030001~metal ion transport                          | 16 | 3.516484 | 0.032301 | ENSG00000117013, | 258 | 465  | 13528 | 1.804184 | 1 | 0.713474 | 42.46784 |
| yellow | GOTERM_BP_FAT | GO:0050877~neurological system process                  | 33 | 7.252747 | 0.034612 | ENSG00000126010, | 258 | 1210 | 13528 | 1.430021 | 1 | 0.730491 | 44.73809 |
| yellow | GOTERM_BP_FAT | GO:0042063~gliogenesis                                  | 5  | 1.098901 | 0.034946 | ENSG00000184486, | 258 | 65   | 13528 | 4.033393 | 1 | 0.72617  | 45.05911 |
| yellow | GOTERM_BP_FAT | GO:0006940~regulation of smooth muscle contraction      | 4  | 0.879121 | 0.03508  | ENSG00000101405, | 258 | 38   | 13528 | 5.51938  | 1 | 0.719909 | 45.18748 |
| yellow | GOTERM_BP_FAT | GO:0042552~myelination                                  | 4  | 0.879121 | 0.03508  | ENSG00000172005, | 258 | 38   | 13528 | 5.51938  | 1 | 0.719909 | 45.18748 |
| yellow | GOTERM_BP_FAT | GO:0030908~protein splicing                             | 2  | 0.43956  | 0.037636 | ENSG00000163501, | 258 | 2    | 13528 | 52.43411 | 1 | 0.737809 | 47.58139 |
| yellow | GOTERM_BP_FAT | GO:0016539~intein-mediated protein splicing             | 2  | 0.43956  | 0.037636 | ENSG00000163501, | 258 | 2    | 13528 | 52.43411 | 1 | 0.737809 | 47.58139 |
| yellow | GOTERM_BP_FAT | GO:0019935~cyclic-nucleotide-mediated signaling         | 7  | 1.538462 | 0.037685 | ENSG00000143199, | 258 | 130  | 13528 | 2.823375 | 1 | 0.73102  | 47.62668 |
| yellow | GOTERM_BP_FAT | GO:0016477~cell migration                               | 11 | 2.417582 | 0.038353 | ENSG00000148704, | 258 | 276  | 13528 | 2.089765 | 1 | 0.730211 | 48.23539 |
| yellow | GOTERM_BP_FAT | GO:0051046~regulation of secretion                      | 9  | 1.978022 | 0.03924  | ENSG00000123612, | 258 | 202  | 13528 | 2.336173 | 1 | 0.731454 | 49.03345 |
| yellow | GOTERM_BP_FAT | GO:0050767~regulation of neurogenesis                   | 8  | 1.758242 | 0.039266 | ENSG00000148704, | 258 | 166  | 13528 | 2.526945 | 1 | 0.724817 | 49.05653 |
| yellow | GOTERM_BP_FAT | GO:0006955~immune response                              | 21 | 4.615385 | 0.039808 | ENSG00000186827, | 258 | 690  | 13528 | 1.595821 | 1 | 0.723016 | 49.53802 |
| yellow | GOTERM_BP_FAT | GO:0001508~regulation of action potential               | 5  | 1.098901 | 0.040249 | ENSG00000172005, | 258 | 68   | 13528 | 3.855449 | 1 | 0.720367 | 49.92698 |
| yellow | GOTERM_BP_FAT | GO:0045664~regulation of neuron differentiation         | 7  | 1.538462 | 0.041382 | ENSG0000016082,  | 258 | 133  | 13528 | 2.75969  | 1 | 0.723925 | 50.91298 |
| yellow | GOTERM_BP_FAT | GO:0055065~metal ion homeostasis                        | 9  | 1.978022 | 0.042158 | ENSG00000108702, | 258 | 205  | 13528 | 2.301985 | 1 | 0.724269 | 51.57802 |
| yellow | GOTERM_BP_FAT | GO:0042391~regulation of membrane potential             | 7  | 1.538462 | 0.042663 | ENSG00000172005, | 258 | 134  | 13528 | 2.739095 | 1 | 0.722303 | 52.00606 |
| yellow | GOTERM_BP_FAT | GO:0051051~negative regulation of transport             | 7  | 1.538462 | 0.043969 | ENSG00000123612, | 258 | 135  | 13528 | 2.718806 | 1 | 0.727076 | 53.09665 |
| yellow | GOTERM_BP_FAT | GO:0046631~alpha-beta T cell activation                 | 3  | 0.659341 | 0.045037 | ENSG00000113302, | 258 | 18   | 13528 | 8.739018 | 1 | 0.729719 | 53.97136 |
| yellow | GOTERM_BP_FAT | GO:0019098~reproductive behavior                        | 3  | 0.659341 | 0.045037 | ENSG00000101200, | 258 | 18   | 13528 | 8.739018 | 1 | 0.729719 | 53.97136 |
| yellow | GOTERM_BP_FAT | GO:0007272~ensheathment of neurons                      | 4  | 0.879121 | 0.045194 | ENSG00000172005, | 258 | 42   | 13528 | 4.993725 | 1 | 0.725024 | 54.09844 |
| yellow | GOTERM_BP_FAT | GO:0008366~axon ensheathment                            | 4  | 0.879121 | 0.045194 | ENSG00000172005, | 258 | 42   | 13528 | 4.993725 | 1 | 0.725024 | 54.09844 |
| yellow | GOTERM_BP_FAT | GO:0048663~neuron fate commitment                       | 4  | 0.879121 | 0.045194 | ENSG0000016082,  | 258 | 42   | 13528 | 4.993725 | 1 | 0.725024 | 54.09844 |
| yellow | GOTERM_BP_FAT | GO:0048667~cell morphogenesis involved in neuron diffe  | 9  | 1.978022 | 0.046363 | ENSG00000162068, | 258 | 209  | 13528 | 2.257928 | 1 | 0.728432 | 55.03546 |
| yellow | GOTERM_BP_FAT | GO:0009725~response to hormone stimulus                 | 13 | 2.857143 | 0.04782  | ENSG00000155846, | 258 | 367  | 13528 | 1.857339 | 1 | 0.733885 | 56.17824 |
| yellow | GOTERM_BP_FAT | GO:0048812~neuron projection morphogenesis              | 9  | 1.978022 | 0.050783 | ENSG00000162068, | 258 | 213  | 13528 | 2.215526 | 1 | 0.749848 | 58.41874 |
| yellow | GOTERM_BP_FAT | GO:0007498~mesoderm development                         | 5  | 1.098901 | 0.052152 | ENSG00000113196, | 258 | 74   | 13528 | 3.542845 | 1 | 0.753846 | 59.41673 |
| yellow | GOTERM_BP_FAT | GO:0043010~camera-type eye development                  | 6  | 1.318681 | 0.053176 | ENSG00000148704, | 258 | 107  | 13528 | 2.94023  | 1 | 0.755389 | 60.14869 |
| yellow | GOTERM_BP_FAT | GO:0006816~calcium ion transport                        | 7  | 1.538462 | 0.053811 | ENSG00000119411, | 258 | 142  | 13528 | 2.58478  | 1 | 0.754329 | 60.5959  |
| yellow | GOTERM_BP_FAT | GO:0002125~maternal aggressive behavior                 | 2  | 0.43956  | 0.055921 | ENSG00000101200, | 258 | 3    | 13528 | 34.95607 | 1 | 0.762749 | 62.04993 |
| yellow | GOTERM_BP_FAT | GO:0060406~positive regulation of penile erection       | 2  | 0.43956  | 0.055921 | ENSG00000101405, | 258 | 3    | 13528 | 34.95607 | 1 | 0.762749 | 62.04993 |
| yellow | GOTERM_BP_FAT | GO:0031175~neuron projection development                | 10 | 2.197802 | 0.056055 | ENSG00000162068, | 258 | 256  | 13528 | 2.048207 | 1 | 0.758523 | 62.14064 |
| yellow | GOTERM_BP_FAT | GO:0010033~response to organic substance                | 21 | 4.615385 | 0.057883 | ENSG00000155846, | 258 | 721  | 13528 | 1.527207 | 1 | 0.764827 | 63.35609 |
| yellow | GOTERM_BP_FAT | GO:0007204~elevation of cytosolic calcium ion concentra | 6  | 1.318681 | 0.058548 | ENSG00000101200, | 258 | 110  | 13528 | 2.860042 | 1 | 0.763937 | 63.78926 |
| yellow | GOTERM_BP_FAT | GO:0006811~ion transport                                | 22 | 4.835165 | 0.059073 | ENSG00000117013, | 258 | 768  | 13528 | 1.502019 | 1 | 0.762236 | 64.12756 |
| yellow | GOTERM_BP_FAT | GO:0006874~cellular calcium ion homeostasis             | 8  | 1.758242 | 0.060379 | ENSG00000108702, | 258 | 183  | 13528 | 2.292201 | 1 | 0.76516  | 64.95703 |
| yellow | GOTERM_BP_FAT | GO:0006812~cation transport                             | 17 | 3.736264 | 0.060849 | ENSG00000117013, | 258 | 553  | 13528 | 1.611898 | 1 | 0.763188 | 65.25114 |
| yellow | GOTERM_BP_FAT | GO:0019725~cellular homeostasis                         | 15 | 3.296703 | 0.061302 | ENSG00000172005, | 258 | 466  | 13528 | 1.687793 | 1 | 0.761153 | 65.53195 |
| yellow | GOTERM_BP_FAT | GO:0006357~regulation of transcription from RNA polym   | 21 | 4.615385 | 0.061604 | ENSG00000155846, | 258 | 727  | 13528 | 1.514603 | 1 | 0.758293 | 65.71828 |
| yellow | GOTERM_BP_FAT | GO:0051050~positive regulation of transport             | 9  | 1.978022 | 0.062973 | ENSG00000186827, | 258 | 223  | 13528 | 2.116175 | 1 | 0.761533 | 66.55084 |
| yellow | GOTERM_BP_FAT | GO:0001525~angiogenesis                                 | 7  | 1.538462 | 0.06323  | ENSG00000128917, | 258 | 148  | 13528 | 2.479992 | 1 | 0.758496 | 66.70487 |

|        |               |                                                         |     |          |          |                   |     |      |       |          |          |          |          |
|--------|---------------|---------------------------------------------------------|-----|----------|----------|-------------------|-----|------|-------|----------|----------|----------|----------|
| yellow | GOTERM_BP_FAT | GO:0001947~heart looping                                | 3   | 0.659341 | 0.064734 | ENSG00000113196,  | 258 | 22   | 13528 | 7.150106 | 1        | 0.762396 | 67.59332 |
| yellow | GOTERM_BP_FAT | GO:0007267~cell-cell signaling                          | 18  | 3.956044 | 0.066565 | ENSG00000101200,  | 258 | 600  | 13528 | 1.573023 | 1        | 0.767883 | 68.64526 |
| yellow | GOTERM_BP_FAT | GO:0051674~localization of cell                         | 11  | 2.417582 | 0.0689   | ENSG00000148704,  | 258 | 307  | 13528 | 1.878747 | 1        | 0.775683 | 69.93992 |
| yellow | GOTERM_BP_FAT | GO:0048870~cell motility                                | 11  | 2.417582 | 0.0689   | ENSG00000148704,  | 258 | 307  | 13528 | 1.878747 | 1        | 0.775683 | 69.93992 |
| yellow | GOTERM_BP_FAT | GO:0019226~transmission of nerve impulse                | 12  | 2.637363 | 0.070952 | ENSG00000172005,  | 258 | 350  | 13528 | 1.797741 | 1        | 0.781695 | 71.03606 |
| yellow | GOTERM_BP_FAT | GO:0014031~mesenchymal cell development                 | 4   | 0.879121 | 0.072543 | ENSG00000016082,  | 258 | 51   | 13528 | 4.112479 | 1        | 0.785257 | 71.85987 |
| yellow | GOTERM_BP_FAT | GO:0048762~mesenchymal cell differentiation             | 4   | 0.879121 | 0.072543 | ENSG00000016082,  | 258 | 51   | 13528 | 4.112479 | 1        | 0.785257 | 71.85987 |
| yellow | GOTERM_BP_FAT | GO:0050670~regulation of lymphocyte proliferation       | 5   | 1.098901 | 0.073205 | ENSG00000186827,  | 258 | 83   | 13528 | 3.158681 | 1        | 0.784373 | 72.19655 |
| yellow | GOTERM_BP_FAT | GO:0042441~eye pigment metabolic process                | 2   | 0.43956  | 0.07386  | ENSG00000123447,  | 258 | 4    | 13528 | 26.21705 | 1        | 0.783472 | 72.52554 |
| yellow | GOTERM_BP_FAT | GO:0048069~eye pigmentation                             | 2   | 0.43956  | 0.07386  | ENSG00000123447,  | 258 | 4    | 13528 | 26.21705 | 1        | 0.783472 | 72.52554 |
| yellow | GOTERM_BP_FAT | GO:0006726~eye pigment biosynthetic process             | 2   | 0.43956  | 0.07386  | ENSG00000123447,  | 258 | 4    | 13528 | 26.21705 | 1        | 0.783472 | 72.52554 |
| yellow | GOTERM_BP_FAT | GO:0060405~regulation of penile erection                | 2   | 0.43956  | 0.07386  | ENSG00000101405,  | 258 | 4    | 13528 | 26.21705 | 1        | 0.783472 | 72.52554 |
| yellow | GOTERM_BP_FAT | GO:0002118~aggressive behavior                          | 2   | 0.43956  | 0.07386  | ENSG00000101200,  | 258 | 4    | 13528 | 26.21705 | 1        | 0.783472 | 72.52554 |
| yellow | GOTERM_BP_FAT | GO:0051480~cytosolic calcium ion homeostasis            | 6   | 1.318681 | 0.074333 | ENSG00000101200,  | 258 | 118  | 13528 | 2.666141 | 1        | 0.781747 | 72.76077 |
| yellow | GOTERM_BP_FAT | GO:0032944~regulation of mononuclear cell proliferation | 5   | 1.098901 | 0.075776 | ENSG00000186827,  | 258 | 84   | 13528 | 3.121078 | 1        | 0.784496 | 73.46665 |
| yellow | GOTERM_BP_FAT | GO:0070663~regulation of leukocyte proliferation        | 5   | 1.098901 | 0.075776 | ENSG00000186827,  | 258 | 84   | 13528 | 3.121078 | 1        | 0.784496 | 73.46665 |
| yellow | GOTERM_BP_FAT | GO:0060485~mesenchyme development                       | 4   | 0.879121 | 0.07595  | ENSG00000016082,  | 258 | 52   | 13528 | 4.033393 | 1        | 0.781456 | 73.55092 |
| yellow | GOTERM_BP_FAT | GO:0007200~activation of phospholipase C activity by G  | 4   | 0.879121 | 0.07595  | ENSG00000132911,  | 258 | 52   | 13528 | 4.033393 | 1        | 0.781456 | 73.55092 |
| yellow | GOTERM_BP_FAT | GO:0000902~cell morphogenesis                           | 12  | 2.637363 | 0.078228 | ENSG00000162068,  | 258 | 356  | 13528 | 1.767442 | 1        | 0.787852 | 74.62764 |
| yellow | GOTERM_BP_FAT | GO:0019932~second-messenger-mediated signaling          | 9   | 1.978022 | 0.07994  | ENSG00000143199,  | 258 | 235  | 13528 | 2.008115 | 1        | 0.791544 | 75.40927 |
| yellow | GOTERM_BP_FAT | GO:0006875~cellular metal ion homeostasis               | 8   | 1.758242 | 0.080453 | ENSG00000108702,  | 258 | 196  | 13528 | 2.140168 | 1        | 0.790073 | 75.63929 |
| yellow | GOTERM_BP_FAT | GO:0021515~cell differentiation in spinal cord          | 3   | 0.659341 | 0.081042 | ENSG00000016082,  | 258 | 25   | 13528 | 6.292093 | 1        | 0.788944 | 75.90067 |
| yellow | GOTERM_BP_FAT | GO:0006813~potassium ion transport                      | 7   | 1.538462 | 0.084806 | ENSG00000117013,  | 258 | 160  | 13528 | 2.293992 | 1        | 0.800801 | 77.50986 |
| yellow | GOTERM_BP_FAT | GO:0009719~response to endogenous stimulus              | 13  | 2.857143 | 0.084899 | ENSG00000155846,  | 258 | 405  | 13528 | 1.68307  | 1        | 0.797683 | 77.54803 |
| yellow | GOTERM_BP_FAT | GO:0055066~di-, tri-valent inorganic cation homeostasis | 9   | 1.978022 | 0.086174 | ENSG00000108702,  | 258 | 239  | 13528 | 1.974506 | 1        | 0.799268 | 78.06932 |
| yellow | GOTERM_BP_FAT | GO:0044243~multicellular organismal catabolic process   | 3   | 0.659341 | 0.086732 | ENSG00000156140,  | 258 | 26   | 13528 | 6.050089 | 1        | 0.798032 | 78.29367 |
| yellow | GOTERM_BP_FAT | GO:0048066~pigmentation during development              | 3   | 0.659341 | 0.086732 | ENSG00000123447,  | 258 | 26   | 13528 | 6.050089 | 1        | 0.798032 | 78.29367 |
| yellow | GOTERM_BP_FAT | GO:0060180~female mating behavior                       | 2   | 0.43956  | 0.09146  | ENSG000000101200, | 258 | 5    | 13528 | 20.97364 | 1        | 0.812418 | 80.10998 |
| yellow | GOTERM_BP_FAT | GO:0002002~regulation of angiotensin levels in blood    | 2   | 0.43956  | 0.09146  | ENSG00000143839,  | 258 | 5    | 13528 | 20.97364 | 1        | 0.812418 | 80.10998 |
| yellow | GOTERM_BP_FAT | GO:0002293~alpha-beta T cell differentiation during imm | 2   | 0.43956  | 0.09146  | ENSG00000113302,  | 258 | 5    | 13528 | 20.97364 | 1        | 0.812418 | 80.10998 |
| yellow | GOTERM_BP_FAT | GO:0060177~regulation of angiotensin metabolic proces   | 2   | 0.43956  | 0.09146  | ENSG00000143839,  | 258 | 5    | 13528 | 20.97364 | 1        | 0.812418 | 80.10998 |
| yellow | GOTERM_BP_FAT | GO:0002312~B cell activation during immune response     | 2   | 0.43956  | 0.09146  | ENSG00000197943,  | 258 | 5    | 13528 | 20.97364 | 1        | 0.812418 | 80.10998 |
| yellow | GOTERM_BP_FAT | GO:0002287~alpha-beta T cell activation during immune   | 2   | 0.43956  | 0.09146  | ENSG00000113302,  | 258 | 5    | 13528 | 20.97364 | 1        | 0.812418 | 80.10998 |
| yellow | GOTERM_BP_FAT | GO:0002292~T cell differentiation during immune respon  | 2   | 0.43956  | 0.09146  | ENSG00000113302,  | 258 | 5    | 13528 | 20.97364 | 1        | 0.812418 | 80.10998 |
| yellow | GOTERM_BP_FAT | GO:0045924~regulation of female receptivity             | 2   | 0.43956  | 0.09146  | ENSG00000101200,  | 258 | 5    | 13528 | 20.97364 | 1        | 0.812418 | 80.10998 |
| yellow | GOTERM_BP_FAT | GO:0002313~mature B cell differentiation during immune  | 2   | 0.43956  | 0.09146  | ENSG00000197943,  | 258 | 5    | 13528 | 20.97364 | 1        | 0.812418 | 80.10998 |
| yellow | GOTERM_BP_FAT | GO:0007618~mating                                       | 3   | 0.659341 | 0.092538 | ENSG00000101200,  | 258 | 27   | 13528 | 5.826012 | 1        | 0.813028 | 80.50377 |
| yellow | GOTERM_BP_FAT | GO:0030030~cell projection organization                 | 12  | 2.637363 | 0.092748 | ENSG00000162068,  | 258 | 368  | 13528 | 1.709808 | 1        | 0.810552 | 80.57954 |
| yellow | GOTERM_BP_FAT | GO:0055080~cation homeostasis                           | 10  | 2.197802 | 0.095689 | ENSG00000115616,  | 258 | 286  | 13528 | 1.83336  | 1        | 0.817638 | 81.61256 |
| yellow | GOTERM_BP_FAT | GO:0048858~cell projection morphogenesis                | 9   | 1.978022 | 0.095923 | ENSG00000162068,  | 258 | 245  | 13528 | 1.926151 | 1        | 0.81531  | 81.69246 |
| yellow | GOTERM_BP_FAT | GO:0060284~regulation of cell development               | 8   | 1.758242 | 0.096289 | ENSG00000148704,  | 258 | 205  | 13528 | 2.046209 | 1        | 0.813452 | 81.81681 |
| yellow | GOTERM_CC_FAT | GO:0005576~extracellular region                         | 63  | 13.84615 | 2.18E-05 | ENSG00000148386,  | 238 | 2010 | 12782 | 1.683319 | 0.004701 | 0.004701 | 0.027681 |
| yellow | GOTERM_CC_FAT | GO:0031224~intrinsic to membrane                        | 127 | 27.91209 | 8.58E-04 | ENSG00000171124,  | 238 | 5485 | 12782 | 1.243509 | 0.169179 | 0.088506 | 1.083122 |
| yellow | GOTERM_CC_FAT | GO:0016021~integral to membrane                         | 121 | 26.59341 | 0.002444 | ENSG00000171124,  | 238 | 5297 | 12782 | 1.22681  | 0.410489 | 0.161511 | 3.057444 |
| yellow | GOTERM_CC_FAT | GO:0044421~extracellular region part                    | 31  | 6.813187 | 0.003327 | ENSG00000162068,  | 238 | 960  | 12782 | 1.734252 | 0.51315  | 0.164688 | 4.141225 |
| yellow | GOTERM_CC_FAT | GO:0005887~integral to plasma membrane                  | 36  | 7.912088 | 0.003986 | ENSG00000126010,  | 238 | 1188 | 12782 | 1.627451 | 0.578022 | 0.158493 | 4.94332  |
| yellow | GOTERM_CC_FAT | GO:0031226~intrinsic to plasma membrane                 | 36  | 7.912088 | 0.005671 | ENSG00000126010,  | 238 | 1215 | 12782 | 1.591285 | 0.707233 | 0.185133 | 6.963428 |
| yellow | GOTERM_CC_FAT | GO:0001533~cornified envelope                           | 4   | 0.879121 | 0.007471 | ENSG00000203782,  | 238 | 22   | 12782 | 9.764706 | 0.802047 | 0.206569 | 9.07837  |



|        |                 |                                                          |    |          |          |                  |     |      |       |          |          |          |          |
|--------|-----------------|----------------------------------------------------------|----|----------|----------|------------------|-----|------|-------|----------|----------|----------|----------|
| yellow | GOTERM_CC_FAT   | GO:0005886~plasma membrane                               | 88 | 19.34066 | 0.009931 | ENSG00000126010, | 238 | 3777 | 12782 | 1.251289 | 0.884181 | 0.236213 | 11.89729 |
| yellow | GOTERM_CC_FAT   | GO:0044459~plasma membrane part                          | 54 | 11.86813 | 0.024201 | ENSG00000126010, | 238 | 2203 | 12782 | 1.31644  | 0.994967 | 0.444544 | 26.72358 |
| yellow | GOTERM_CC_FAT   | GO:0045121~membrane raft                                 | 7  | 1.538462 | 0.050215 | ENSG00000121743, | 238 | 143  | 12782 | 2.628959 | 0.999985 | 0.671371 | 47.99746 |
| yellow | GOTERM_CC_FAT   | GO:0005615~extracellular space                           | 20 | 4.395604 | 0.051887 | ENSG00000108702, | 238 | 685  | 12782 | 1.568055 | 0.99999  | 0.648753 | 49.14773 |
| yellow | GOTERM_CC_FAT   | GO:0005578~proteinaceous extracellular matrix            | 11 | 2.417582 | 0.074807 | ENSG00000169436, | 238 | 320  | 12782 | 1.84614  | 1        | 0.753294 | 62.72434 |
| yellow | GOTERM_CC_FAT   | GO:0034702~ion channel complex                           | 8  | 1.758242 | 0.087837 | ENSG00000117013, | 238 | 205  | 12782 | 2.095839 | 1        | 0.782937 | 68.86519 |
| yellow | GOTERM_MF_FAT   | GO:0015267~channel activity                              | 18 | 3.956044 | 0.002653 | ENSG00000117013, | 251 | 412  | 12983 | 2.259834 | 0.686835 | 0.686835 | 3.683847 |
| yellow | GOTERM_MF_FAT   | GO:0022803~passive transmembrane transporter activity    | 18 | 3.956044 | 0.002705 | ENSG00000117013, | 251 | 413  | 12983 | 2.254363 | 0.693867 | 0.446707 | 3.754541 |
| yellow | GOTERM_MF_FAT   | GO:0022838~substrate specific channel activity           | 16 | 3.516484 | 0.010284 | ENSG00000117013, | 251 | 398  | 12983 | 2.079401 | 0.989084 | 0.778166 | 13.58797 |
| yellow | GOTERM_MF_FAT   | GO:0003700~transcription factor activity                 | 30 | 6.593407 | 0.012692 | ENSG00000091656, | 251 | 975  | 12983 | 1.591542 | 0.996235 | 0.752289 | 16.5111  |
| yellow | GOTERM_MF_FAT   | GO:0022836~gated channel activity                        | 13 | 2.857143 | 0.017052 | ENSG00000117013, | 251 | 310  | 12983 | 2.169117 | 0.999456 | 0.777587 | 21.57159 |
| yellow | GOTERM_MF_FAT   | GO:0005216~ion channel activity                          | 15 | 3.296703 | 0.017538 | ENSG00000117013, | 251 | 386  | 12983 | 2.010043 | 0.999561 | 0.724362 | 22.11708 |
| yellow | GOTERM_MF_FAT   | GO:0003677~DNA binding                                   | 59 | 12.96703 | 0.02027  | ENSG00000175322, | 251 | 2331 | 12983 | 1.309215 | 0.99987  | 0.721528 | 25.12194 |
| yellow | GOTERM_MF_FAT   | GO:0005509~calcium ion binding                           | 27 | 5.934066 | 0.03106  | ENSG00000128917, | 251 | 919  | 12983 | 1.519671 | 0.999999 | 0.821566 | 35.96593 |
| yellow | GOTERM_MF_FAT   | GO:0005229~intracellular calcium activated chloride chan | 2  | 0.43956  | 0.038143 | ENSG00000132911, | 251 | 2    | 12983 | 51.7251  | 1        | 0.848668 | 42.27076 |
| yellow | GOTERM_MF_FAT   | GO:0031895~V1B vasopressin receptor binding              | 2  | 0.43956  | 0.038143 | ENSG00000101200, | 251 | 2    | 12983 | 51.7251  | 1        | 0.848668 | 42.27076 |
| yellow | GOTERM_MF_FAT   | GO:0031855~oxytocin receptor binding                     | 2  | 0.43956  | 0.038143 | ENSG00000101200, | 251 | 2    | 12983 | 51.7251  | 1        | 0.848668 | 42.27076 |
| yellow | GOTERM_MF_FAT   | GO:0008188~neuropeptide receptor activity                | 4  | 0.879121 | 0.041332 | ENSG00000126010, | 251 | 40   | 12983 | 51.7251  | 1        | 0.841911 | 44.91703 |
| yellow | GOTERM_MF_FAT   | GO:0022839~ion gated channel activity                    | 3  | 0.659341 | 0.041532 | ENSG00000135643, | 251 | 17   | 12983 | 9.127959 | 1        | 0.814592 | 45.07923 |
| yellow | GOTERM_MF_FAT   | GO:0005267~potassium channel activity                    | 7  | 1.538462 | 0.043671 | ENSG00000117013, | 251 | 133  | 12983 | 2.722374 | 1        | 0.803307 | 46.78529 |
| yellow | GOTERM_MF_FAT   | GO:0042923~neuropeptide binding                          | 4  | 0.879121 | 0.043981 | ENSG00000126010, | 251 | 41   | 12983 | 5.046351 | 1        | 0.77952  | 47.029   |
| yellow | GOTERM_MF_FAT   | GO:0043565~sequence-specific DNA binding                 | 19 | 4.175824 | 0.047282 | ENSG00000214513, | 251 | 607  | 12983 | 1.619072 | 1        | 0.779513 | 49.55524 |
| yellow | GOTERM_MF_FAT   | GO:0031894~V1A vasopressin receptor binding              | 2  | 0.43956  | 0.056667 | ENSG00000101200, | 251 | 3    | 12983 | 34.4834  | 1        | 0.817228 | 56.13886 |
| yellow | GOTERM_MF_FAT   | GO:0031893~vasopressin receptor binding                  | 2  | 0.43956  | 0.056667 | ENSG00000101200, | 251 | 3    | 12983 | 34.4834  | 1        | 0.817228 | 56.13886 |
| yellow | GOTERM_MF_FAT   | GO:0005113~patched binding                               | 2  | 0.43956  | 0.056667 | ENSG00000163501, | 251 | 3    | 12983 | 34.4834  | 1        | 0.817228 | 56.13886 |
| yellow | GOTERM_MF_FAT   | GO:0031404~chloride ion binding                          | 5  | 1.098901 | 0.061111 | ENSG00000039987, | 251 | 77   | 12983 | 3.358773 | 1        | 0.821338 | 58.96922 |
| yellow | GOTERM_MF_FAT   | GO:0001653~peptide receptor activity                     | 6  | 1.318681 | 0.069226 | ENSG00000126010, | 251 | 114  | 12983 | 2.722374 | 1        | 0.841832 | 63.7049  |
| yellow | GOTERM_MF_FAT   | GO:0008528~peptide receptor activity, G-protein couple   | 6  | 1.318681 | 0.069226 | ENSG00000126010, | 251 | 114  | 12983 | 2.722374 | 1        | 0.841832 | 63.7049  |
| yellow | GOTERM_MF_FAT   | GO:0005244~voltage-gated ion channel activity            | 8  | 1.758242 | 0.084186 | ENSG00000117013, | 251 | 195  | 12983 | 2.122055 | 1        | 0.881759 | 71.1309  |
| yellow | GOTERM_MF_FAT   | GO:0022832~voltage-gated channel activity                | 8  | 1.758242 | 0.084186 | ENSG00000117013, | 251 | 195  | 12983 | 2.122055 | 1        | 0.881759 | 71.1309  |
| yellow | GOTERM_MF_FAT   | GO:0005125~cytokine activity                             | 8  | 1.758242 | 0.084186 | ENSG00000108702, | 251 | 195  | 12983 | 2.122055 | 1        | 0.881759 | 71.1309  |
| yellow | GOTERM_MF_FAT   | GO:0005261~cation channel activity                       | 10 | 2.197802 | 0.084763 | ENSG00000117013, | 251 | 275  | 12983 | 1.880913 | 1        | 0.869603 | 71.38711 |
| yellow | HIV_INTERACTION | env:Envelope surface glycoprotein gp120                  | 12 | 2.637363 | 0.089951 | ENSG00000204007, | 21  | 529  | 1394  | 1.505806 | 0.571861 | 0.571861 | 41.86757 |
| yellow | INTERPRO        | IPR013087:Zinc finger, C2H2-type/integrase, DNA-binding  | 25 | 5.494505 | 8.76E-04 | ENSG00000175322, | 319 | 621  | 16659 | 2.102358 | 0.403618 | 0.403618 | 1.282596 |
| yellow | INTERPRO        | IPR007087:Zinc finger, C2H2-type                         | 28 | 6.153846 | 0.002299 | ENSG00000175322, | 319 | 784  | 16659 | 1.865092 | 0.742768 | 0.49282  | 3.334204 |
| yellow | INTERPRO        | IPR015880:Zinc finger, C2H2-like                         | 28 | 6.153846 | 0.002894 | ENSG00000175322, | 319 | 797  | 16659 | 1.83467  | 0.81915  | 0.434491 | 4.181028 |
| yellow | INTERPRO        | IPR017970:Homeobox, conserved site                       | 12 | 2.637363 | 0.005114 | ENSG00000148704, | 319 | 232  | 16659 | 2.701167 | 0.951449 | 0.530594 | 7.276953 |
| yellow | INTERPRO        | IPR001356:Homeobox                                       | 12 | 2.637363 | 0.005622 | ENSG00000148704, | 319 | 235  | 16659 | 2.666684 | 0.964071 | 0.485851 | 7.971526 |
| yellow | INTERPRO        | IPR012287:Homeodomain-related                            | 12 | 2.637363 | 0.006172 | ENSG00000148704, | 319 | 238  | 16659 | 2.633071 | 0.974087 | 0.456015 | 8.719575 |
| yellow | INTERPRO        | IPR013032:EGF-like region, conserved site                | 13 | 2.857143 | 0.010865 | ENSG00000156076, | 319 | 293  | 16659 | 2.317042 | 0.998412 | 0.601787 | 14.86854 |
| yellow | INTERPRO        | IPR001909:Krueppel-associated box                        | 14 | 3.076923 | 0.019209 | ENSG00000175322, | 319 | 355  | 16659 | 2.059482 | 0.999989 | 0.760801 | 24.85919 |
| yellow | INTERPRO        | IPR011598:Helix-loop-helix DNA-binding                   | 6  | 1.318681 | 0.022278 | ENSG00000113196, | 319 | 84   | 16659 | 3.730184 | 0.999998 | 0.771669 | 28.25014 |
| yellow | INTERPRO        | IPR004075:Interleukin-1 receptor, type I/Toll precursor  | 3  | 0.659341 | 0.02466  | ENSG00000115607, | 319 | 13   | 16659 | 12.05136 | 1        | 0.770798 | 30.78274 |
| yellow | INTERPRO        | IPR016321:Nonapeptide hormone precursor                  | 2  | 0.43956  | 0.037814 | ENSG00000101200, | 319 | 2    | 16659 | 52.22257 | 1        | 0.873507 | 43.33494 |
| yellow | INTERPRO        | IPR000981:Neurohypophysial hormone                       | 2  | 0.43956  | 0.037814 | ENSG00000101200, | 319 | 2    | 16659 | 52.22257 | 1        | 0.873507 | 43.33494 |
| yellow | INTERPRO        | IPR006141:Intein splicing site                           | 2  | 0.43956  | 0.037814 | ENSG00000163501, | 319 | 2    | 16659 | 52.22257 | 1        | 0.873507 | 43.33494 |
| yellow | INTERPRO        | IPR003587:Hedgehog/intein hint, N-terminal               | 2  | 0.43956  | 0.056183 | ENSG00000163501, | 319 | 3    | 16659 | 34.81505 | 1        | 0.941749 | 57.3458  |
| yellow | INTERPRO        | IPR001767:Peptidase C46, hedgehog protein, hint region   | 2  | 0.43956  | 0.056183 | ENSG00000163501, | 319 | 3    | 16659 | 34.81505 | 1        | 0.941749 | 57.3458  |

|        |                 |                                                          |     |          |          |                  |     |      |       |          |          |          |          |
|--------|-----------------|----------------------------------------------------------|-----|----------|----------|------------------|-----|------|-------|----------|----------|----------|----------|
| yellow | INTERPRO        | IPR001657:Peptidase C46, hedgehog protein                | 2   | 0.43956  | 0.056183 | ENSG00000163501, | 319 | 3    | 16659 | 34.81505 | 1        | 0.941749 | 57.3458  |
| yellow | INTERPRO        | IPR003586:Hedgehog/intein hint domain, C-terminal        | 2   | 0.43956  | 0.056183 | ENSG00000163501, | 319 | 3    | 16659 | 34.81505 | 1        | 0.941749 | 57.3458  |
| yellow | INTERPRO        | IPR000320:Hedgehog amino-terminal signaling region       | 2   | 0.43956  | 0.056183 | ENSG00000163501, | 319 | 3    | 16659 | 34.81505 | 1        | 0.941749 | 57.3458  |
| yellow | INTERPRO        | IPR005821:Ion transport                                  | 6   | 1.318681 | 0.059663 | ENSG00000117013, | 319 | 110  | 16659 | 2.848504 | 1        | 0.938698 | 59.60539 |
| yellow | INTERPRO        | IPR008957:Fibronectin, type III-like fold                | 8   | 1.758242 | 0.062628 | ENSG00000080224, | 319 | 184  | 16659 | 2.270547 | 1        | 0.934493 | 61.44207 |
| yellow | INTERPRO        | IPR003129:Laminin G, thrombospondin-type, N-terminal     | 3   | 0.659341 | 0.065305 | ENSG00000169436, | 319 | 22   | 16659 | 7.12126  | 1        | 0.929797 | 63.03292 |
| yellow | INTERPRO        | IPR001092:Basic helix-loop-helix dimerisation region bHL | 6   | 1.318681 | 0.067409 | ENSG00000113196, | 319 | 114  | 16659 | 2.748556 | 1        | 0.92373  | 64.24072 |
| yellow | INTERPRO        | IPR000157:Toll-Interleukin receptor                      | 3   | 0.659341 | 0.070649 | ENSG00000115607, | 319 | 23   | 16659 | 6.81164  | 1        | 0.921357 | 66.02781 |
| yellow | INTERPRO        | IPR003961:Fibronectin, type III                          | 8   | 1.758242 | 0.072469 | ENSG00000080224, | 319 | 190  | 16659 | 2.198845 | 1        | 0.915062 | 66.99516 |
| yellow | INTERPRO        | IPR003302:Cornein (SPRR)                                 | 2   | 0.43956  | 0.074203 | ENSG00000169474, | 319 | 4    | 16659 | 26.11129 | 1        | 0.908751 | 67.89293 |
| yellow | INTERPRO        | IPR000742:EGF-like, type 3                               | 8   | 1.758242 | 0.078932 | ENSG00000128917, | 319 | 194  | 16659 | 2.153508 | 1        | 0.911569 | 70.22664 |
| yellow | INTERPRO        | IPR006207:Cystine knot, C-terminal                       | 3   | 0.659341 | 0.081739 | ENSG00000198788, | 319 | 25   | 16659 | 6.266708 | 1        | 0.9089   | 71.53615 |
| yellow | INTERPRO        | IPR006210:EGF-like                                       | 8   | 1.758242 | 0.091029 | ENSG00000128917, | 319 | 201  | 16659 | 2.07851  | 1        | 0.922663 | 75.49681 |
| yellow | INTERPRO        | IPR006209:EGF                                            | 6   | 1.318681 | 0.096221 | ENSG00000128917, | 319 | 127  | 16659 | 2.467208 | 1        | 0.925372 | 77.48005 |
| yellow | INTERPRO        | IPR016160:Aldehyde dehydrogenase, conserved site         | 3   | 0.659341 | 0.09928  | ENSG00000137462, | 319 | 28   | 16659 | 5.595275 | 1        | 0.923499 | 78.57755 |
| yellow | KEGG_PATHWAY    | hsa04080:Neuroactive ligand-receptor interaction         | 12  | 2.637363 | 0.006586 | ENSG00000126010, | 94  | 256  | 5085  | 2.535738 | 0.444591 | 0.444591 | 6.921253 |
| yellow | KEGG_PATHWAY    | hsa04060:Cytokine-cytokine receptor interaction          | 11  | 2.417582 | 0.020525 | ENSG00000175189, | 94  | 262  | 5085  | 2.271195 | 0.842092 | 0.602623 | 20.15831 |
| yellow | OMIM_DISEASE    | A genomewide association study of skin pigmentation in   | 2   | 0.43956  | 0.047458 | ENSG00000123447, | 60  | 3    | 3671  | 40.78889 | 0.998946 | 0.998946 | 43.69533 |
| yellow | OMIM_DISEASE    | Sequence variants in the autophagy gene IRGM and mul     | 2   | 0.43956  | 0.077859 | ENSG00000113302, | 60  | 5    | 3671  | 24.47333 | 0.999989 | 0.996702 | 61.61811 |
| yellow | PIR_SUPERFAMILY | PIRSF001815:Nonapeptide_hormone_precursor                | 2   | 0.43956  | 0.036441 | ENSG00000101200, | 137 | 2    | 7396  | 53.9854  | 0.996829 | 0.996829 | 35.96919 |
| yellow | PIR_SUPERFAMILY | PIRSF001815:nonapeptide hormone precursor                | 2   | 0.43956  | 0.036441 | ENSG00000101200, | 137 | 2    | 7396  | 53.9854  | 0.996829 | 0.996829 | 35.96919 |
| yellow | PIR_SUPERFAMILY | PIRSF005559:zinc finger protein ZFP-36                   | 7   | 1.538462 | 0.040204 | ENSG00000175322, | 137 | 137  | 7396  | 2.758378 | 0.998271 | 0.958421 | 38.90834 |
| yellow | PIR_SUPERFAMILY | PIRSF009400:Peptidase_C46                                | 2   | 0.43956  | 0.054164 | ENSG00000163501, | 137 | 3    | 7396  | 35.99027 | 0.999822 | 0.943703 | 48.76537 |
| yellow | PIR_SUPERFAMILY | PIRSF009400:hedgehog protein                             | 2   | 0.43956  | 0.054164 | ENSG00000163501, | 137 | 3    | 7396  | 35.99027 | 0.999822 | 0.943703 | 48.76537 |
| yellow | PIR_SUPERFAMILY | PIRSF002642:transcription factor isl-1                   | 2   | 0.43956  | 0.071563 | ENSG0000016082,  | 137 | 4    | 7396  | 26.9927  | 0.99999  | 0.943714 | 59.00555 |
| yellow | SMART           | SM00389:HOX                                              | 12  | 2.637363 | 0.015296 | ENSG00000148704, | 202 | 235  | 9079  | 2.295092 | 0.893016 | 0.893016 | 16.72254 |
| yellow | SMART           | SM00355:ZnF_C2H2                                         | 28  | 6.153846 | 0.016768 | ENSG00000175322, | 202 | 797  | 9079  | 1.579015 | 0.913872 | 0.706524 | 18.188   |
| yellow | SMART           | SM00003:NH                                               | 2   | 0.43956  | 0.04379  | ENSG00000101200, | 202 | 2    | 9079  | 44.94554 | 0.998486 | 0.885166 | 41.23279 |
| yellow | SMART           | SM00349:KRAB                                             | 14  | 3.076923 | 0.051586 | ENSG00000175322, | 202 | 355  | 9079  | 1.7725   | 0.999538 | 0.853383 | 46.67494 |
| yellow | SMART           | SM00306:HintN                                            | 2   | 0.43956  | 0.064964 | ENSG00000163501, | 202 | 3    | 9079  | 29.9637  | 0.999941 | 0.857434 | 54.95119 |
| yellow | SMART           | SM00305:HintC                                            | 2   | 0.43956  | 0.064964 | ENSG00000163501, | 202 | 3    | 9079  | 29.9637  | 0.999941 | 0.857434 | 54.95119 |
| yellow | SMART           | SM00210:TSPN                                             | 3   | 0.659341 | 0.08436  | ENSG00000169436, | 202 | 22   | 9079  | 6.128938 | 0.999997 | 0.881145 | 64.87523 |
| yellow | SMART           | SM00255:TIR                                              | 3   | 0.659341 | 0.091093 | ENSG00000115607, | 202 | 23   | 9079  | 5.862462 | 0.999999 | 0.86172  | 67.82193 |
| yellow | SP_PIR_KEYWORDS | glycoprotein                                             | 127 | 27.91209 | 2.97E-08 | ENSG00000171124, | 361 | 4318 | 19235 | 1.567134 | 9.40E-06 | 9.40E-06 | 4.00E-05 |
| yellow | SP_PIR_KEYWORDS | Secreted                                                 | 59  | 12.96703 | 4.42E-06 | ENSG00000148386, | 361 | 1689 | 19235 | 1.861261 | 0.001399 | 7.00E-04 | 0.005949 |
| yellow | SP_PIR_KEYWORDS | signal                                                   | 95  | 20.87912 | 5.65E-06 | ENSG00000148386, | 361 | 3250 | 19235 | 1.55749  | 0.00179  | 5.97E-04 | 0.007617 |
| yellow | SP_PIR_KEYWORDS | cleavage on pair of basic residues                       | 16  | 3.516484 | 1.94E-04 | ENSG00000175189, | 361 | 271  | 19235 | 3.145833 | 0.059596 | 0.015244 | 0.260859 |
| yellow | SP_PIR_KEYWORDS | disulfide bond                                           | 80  | 17.58242 | 3.82E-04 | ENSG00000126010, | 361 | 2924 | 19235 | 1.457799 | 0.114041 | 0.023926 | 0.513394 |
| yellow | SP_PIR_KEYWORDS | dna-binding                                              | 54  | 11.86813 | 0.001435 | ENSG00000175322, | 361 | 1868 | 19235 | 1.540288 | 0.365612 | 0.073044 | 1.915962 |
| yellow | SP_PIR_KEYWORDS | developmental protein                                    | 28  | 6.153846 | 0.00162  | ENSG00000163501, | 361 | 779  | 19235 | 1.915162 | 0.401878 | 0.070792 | 2.161092 |
| yellow | SP_PIR_KEYWORDS | transcription regulation                                 | 55  | 12.08791 | 0.004804 | ENSG00000175322, | 361 | 2026 | 19235 | 1.446466 | 0.782728 | 0.173724 | 6.283345 |
| yellow | SP_PIR_KEYWORDS | Homeobox                                                 | 12  | 2.637363 | 0.006089 | ENSG00000148704, | 361 | 242  | 19235 | 2.64211  | 0.855729 | 0.193554 | 7.900412 |
| yellow | SP_PIR_KEYWORDS | autocatalytic cleavage                                   | 4   | 0.879121 | 0.006733 | ENSG00000198788, | 361 | 21   | 19235 | 10.14906 | 0.882517 | 0.192769 | 8.701051 |
| yellow | SP_PIR_KEYWORDS | ionic channel                                            | 14  | 3.076923 | 0.007161 | ENSG00000117013, | 361 | 318  | 19235 | 2.345773 | 0.897538 | 0.187074 | 9.230436 |
| yellow | SP_PIR_KEYWORDS | transmembrane                                            | 114 | 25.05495 | 0.01011  | ENSG00000171124, | 361 | 4973 | 19235 | 1.221438 | 0.960094 | 0.235426 | 12.79696 |
| yellow | SP_PIR_KEYWORDS | Transcription                                            | 54  | 11.86813 | 0.011419 | ENSG00000175322, | 361 | 2071 | 19235 | 1.389308 | 0.973763 | 0.244251 | 14.33773 |
| yellow | SP_PIR_KEYWORDS | Signal-anchor                                            | 16  | 3.516484 | 0.013501 | ENSG00000198108, | 361 | 421  | 19235 | 2.02499  | 0.986551 | 0.264921 | 16.73695 |
| yellow | SP_PIR_KEYWORDS | cell membrane                                            | 55  | 12.08791 | 0.022182 | ENSG00000126010, | 361 | 2194 | 19235 | 1.335707 | 0.999184 | 0.377531 | 26.08664 |

|        |                 |                                                       |     |          |          |                  |     |      |       |          |          |          |          |
|--------|-----------------|-------------------------------------------------------|-----|----------|----------|------------------|-----|------|-------|----------|----------|----------|----------|
| yellow | SP_PIR_KEYWORDS | voltage-gated channel                                 | 8   | 1.758242 | 0.02299  | ENSG00000117013, | 361 | 150  | 19235 | 2.841736 | 0.999372 | 0.369221 | 26.90488 |
| yellow | SP_PIR_KEYWORDS | Albinism                                              | 3   | 0.659341 | 0.0274   | ENSG00000123447, | 361 | 14   | 19235 | 11.41769 | 0.99985  | 0.40433  | 31.22857 |
| yellow | SP_PIR_KEYWORDS | tumor antigen                                         | 4   | 0.879121 | 0.033846 | ENSG00000123447, | 361 | 38   | 19235 | 5.608689 | 0.999982 | 0.454683 | 37.12258 |
| yellow | SP_PIR_KEYWORDS | amidated carboxyl end                                 | 3   | 0.659341 | 0.039475 | ENSG00000101200, | 361 | 17   | 19235 | 9.402803 | 0.999997 | 0.48929  | 41.88317 |
| yellow | SP_PIR_KEYWORDS | receptor                                              | 40  | 8.791209 | 0.047109 | ENSG00000126010, | 361 | 1583 | 19235 | 1.346369 | 1        | 0.534587 | 47.80798 |
| yellow | SP_PIR_KEYWORDS | palmitate                                             | 9   | 1.978022 | 0.047601 | ENSG00000126010, | 361 | 213  | 19235 | 2.251375 | 1        | 0.521074 | 48.17006 |
| yellow | SP_PIR_KEYWORDS | tandem repeat                                         | 5   | 1.098901 | 0.05208  | ENSG00000198788, | 361 | 75   | 19235 | 3.55217  | 1        | 0.537301 | 51.36048 |
| yellow | SP_PIR_KEYWORDS | chloride                                              | 5   | 1.098901 | 0.05208  | ENSG00000039987, | 361 | 75   | 19235 | 3.55217  | 1        | 0.537301 | 51.36048 |
| yellow | SP_PIR_KEYWORDS | potassium channel                                     | 5   | 1.098901 | 0.058571 | ENSG00000117013, | 361 | 78   | 19235 | 3.415548 | 1        | 0.564763 | 55.66146 |
| yellow | SP_PIR_KEYWORDS | membrane                                              | 132 | 29.01099 | 0.064797 | ENSG00000171124, | 361 | 6256 | 19235 | 1.124248 | 1        | 0.587223 | 59.45399 |
| yellow | SP_PIR_KEYWORDS | potassium transport                                   | 6   | 1.318681 | 0.065051 | ENSG00000117013, | 361 | 115  | 19235 | 2.779959 | 1        | 0.573821 | 59.60198 |
| yellow | SP_PIR_KEYWORDS | cataract                                              | 4   | 0.879121 | 0.0669   | ENSG00000121743, | 361 | 50   | 19235 | 4.262604 | 1        | 0.570115 | 60.66576 |
| yellow | SP_PIR_KEYWORDS | egf-like domain                                       | 9   | 1.978022 | 0.068272 | ENSG00000128917, | 361 | 230  | 19235 | 2.084969 | 1        | 0.564054 | 61.4377  |
| yellow | SP_PIR_KEYWORDS | calcium                                               | 22  | 4.835165 | 0.077293 | ENSG00000151005, | 361 | 803  | 19235 | 1.459796 | 1        | 0.597774 | 66.17621 |
| yellow | SP_PIR_KEYWORDS | peroxidase                                            | 3   | 0.659341 | 0.079028 | ENSG00000095303, | 361 | 25   | 19235 | 6.393906 | 1        | 0.593392 | 67.02317 |
| yellow | SP_PIR_KEYWORDS | potassium                                             | 6   | 1.318681 | 0.088142 | ENSG00000117013, | 361 | 126  | 19235 | 2.537264 | 1        | 0.622808 | 71.15938 |
| yellow | UP_SEQ_FEATURE  | glycosylation site:N-linked (GlcNAc...)               | 122 | 26.81319 | 4.47E-08 | ENSG00000171124, | 358 | 4129 | 19113 | 1.577469 | 4.74E-05 | 4.74E-05 | 7.11E-05 |
| yellow | UP_SEQ_FEATURE  | signal peptide                                        | 95  | 20.87912 | 5.09E-06 | ENSG00000148386, | 358 | 3250 | 19113 | 1.56058  | 0.005389 | 0.002698 | 0.0081   |
| yellow | UP_SEQ_FEATURE  | zinc finger region:C2H2-type 8                        | 22  | 4.835165 | 4.13E-05 | ENSG00000175322, | 358 | 417  | 19113 | 2.816647 | 0.042941 | 0.014523 | 0.065775 |
| yellow | UP_SEQ_FEATURE  | zinc finger region:C2H2-type 7                        | 23  | 5.054945 | 4.40E-05 | ENSG00000175322, | 358 | 451  | 19113 | 2.722683 | 0.045648 | 0.011613 | 0.070018 |
| yellow | UP_SEQ_FEATURE  | zinc finger region:C2H2-type 6                        | 24  | 5.274725 | 5.01E-05 | ENSG00000175322, | 358 | 488  | 19113 | 2.625653 | 0.051859 | 0.010594 | 0.079801 |
| yellow | UP_SEQ_FEATURE  | zinc finger region:C2H2-type 5                        | 25  | 5.494505 | 8.13E-05 | ENSG00000175322, | 358 | 538  | 19113 | 2.480867 | 0.082701 | 0.014284 | 0.129324 |
| yellow | UP_SEQ_FEATURE  | zinc finger region:C2H2-type 2                        | 26  | 5.714286 | 2.07E-04 | ENSG00000175322, | 358 | 608  | 19113 | 2.283051 | 0.1977   | 0.030978 | 0.329675 |
| yellow | UP_SEQ_FEATURE  | topological domain:Cytoplasmic                        | 90  | 19.78022 | 3.05E-04 | ENSG00000126010, | 358 | 3374 | 19113 | 1.424109 | 0.276956 | 0.039725 | 0.484969 |
| yellow | UP_SEQ_FEATURE  | topological domain:Extracellular                      | 75  | 16.48352 | 4.63E-04 | ENSG00000126010, | 358 | 2719 | 19113 | 1.472644 | 0.388223 | 0.053135 | 0.73395  |
| yellow | UP_SEQ_FEATURE  | zinc finger region:C2H2-type 4                        | 24  | 5.274725 | 5.40E-04 | ENSG00000175322, | 358 | 575  | 19113 | 2.22838  | 0.436534 | 0.05575  | 0.856289 |
| yellow | UP_SEQ_FEATURE  | zinc finger region:C2H2-type 10                       | 17  | 3.736264 | 5.85E-04 | ENSG00000175322, | 358 | 334  | 19113 | 2.717367 | 0.462668 | 0.054903 | 0.926851 |
| yellow | UP_SEQ_FEATURE  | zinc finger region:C2H2-type 9                        | 18  | 3.956044 | 7.58E-04 | ENSG00000175322, | 358 | 376  | 19113 | 2.555821 | 0.552971 | 0.064893 | 1.199747 |
| yellow | UP_SEQ_FEATURE  | disulfide bond                                        | 75  | 16.48352 | 0.001293 | ENSG00000126010, | 358 | 2819 | 19113 | 1.420404 | 0.746947 | 0.10031  | 2.038976 |
| yellow | UP_SEQ_FEATURE  | zinc finger region:C2H2-type 3                        | 24  | 5.274725 | 0.001539 | ENSG00000175322, | 358 | 622  | 19113 | 2.059997 | 0.805266 | 0.110295 | 2.422928 |
| yellow | UP_SEQ_FEATURE  | zinc finger region:C2H2-type 12                       | 13  | 2.857143 | 0.002894 | ENSG00000175691, | 358 | 252  | 19113 | 2.754157 | 0.953954 | 0.185522 | 4.509673 |
| yellow | UP_SEQ_FEATURE  | DNA-binding region:Homeobox                           | 11  | 2.417582 | 0.003134 | ENSG00000148704, | 358 | 190  | 19113 | 3.0909   | 0.964334 | 0.188074 | 4.87462  |
| yellow | UP_SEQ_FEATURE  | transmembrane region                                  | 113 | 24.83516 | 0.008743 | ENSG00000171124, | 358 | 4911 | 19113 | 1.228441 | 0.999911 | 0.422246 | 13.04801 |
| yellow | UP_SEQ_FEATURE  | zinc finger region:C2H2-type 11                       | 12  | 2.637363 | 0.022364 | ENSG00000175691, | 358 | 293  | 19113 | 2.18655  | 1        | 0.736696 | 30.23888 |
| yellow | UP_SEQ_FEATURE  | domain:KRAB                                           | 13  | 2.857143 | 0.022756 | ENSG00000175322, | 358 | 332  | 19113 | 2.090504 | 1        | 0.723808 | 30.68349 |
| yellow | UP_SEQ_FEATURE  | domain:EGF-like 4                                     | 5   | 1.098901 | 0.023037 | ENSG00000128917, | 358 | 58   | 19113 | 4.602437 | 1        | 0.709908 | 30.99929 |
| yellow | UP_SEQ_FEATURE  | zinc finger region:C2H2-type 1                        | 18  | 3.956044 | 0.026647 | ENSG00000189420, | 358 | 542  | 19113 | 1.773042 | 1        | 0.744835 | 34.94869 |
| yellow | UP_SEQ_FEATURE  | site:Cleavage; by autolysis                           | 3   | 0.659341 | 0.035129 | ENSG00000163501, | 358 | 16   | 19113 | 10.0103  | 1        | 0.822053 | 43.41019 |
| yellow | UP_SEQ_FEATURE  | zinc finger region:C2H2-type 13                       | 9   | 1.978022 | 0.035291 | ENSG00000167766, | 358 | 201  | 19113 | 2.390519 | 1        | 0.809668 | 43.5616  |
| yellow | UP_SEQ_FEATURE  | compositionally biased region:Gly-rich                | 10  | 2.197802 | 0.03533  | ENSG00000169436, | 358 | 238  | 19113 | 2.243205 | 1        | 0.796405 | 43.59737 |
| yellow | UP_SEQ_FEATURE  | lipid moiety-binding region:Cholesterol glycine ester | 2   | 0.43956  | 0.054998 | ENSG00000163501, | 358 | 3    | 19113 | 35.59218 | 1        | 0.909555 | 59.36785 |
| yellow | UP_SEQ_FEATURE  | site:Involved in cholesterol transfer                 | 2   | 0.43956  | 0.054998 | ENSG00000163501, | 358 | 3    | 19113 | 35.59218 | 1        | 0.909555 | 59.36785 |
| yellow | UP_SEQ_FEATURE  | lipid moiety-binding region:N-palmitoyl cysteine      | 2   | 0.43956  | 0.054998 | ENSG00000163501, | 358 | 3    | 19113 | 35.59218 | 1        | 0.909555 | 59.36785 |
| yellow | UP_SEQ_FEATURE  | site:Essential for auto-cleavage                      | 2   | 0.43956  | 0.054998 | ENSG00000163501, | 358 | 3    | 19113 | 35.59218 | 1        | 0.909555 | 59.36785 |
| yellow | UP_SEQ_FEATURE  | site:Involved in auto-cleavage                        | 2   | 0.43956  | 0.054998 | ENSG00000163501, | 358 | 3    | 19113 | 35.59218 | 1        | 0.909555 | 59.36785 |
| yellow | UP_SEQ_FEATURE  | domain:Helix-loop-helix motif                         | 6   | 1.318681 | 0.062709 | ENSG00000113196, | 358 | 114  | 19113 | 2.809909 | 1        | 0.929014 | 64.33724 |
| yellow | UP_SEQ_FEATURE  | propeptide:Removed in mature form                     | 9   | 1.978022 | 0.066007 | ENSG00000116996, | 358 | 229  | 19113 | 2.098229 | 1        | 0.931842 | 66.28324 |
| yellow | UP_SEQ_FEATURE  | compositionally biased region:Poly-Ala                | 13  | 2.857143 | 0.066458 | ENSG00000169436, | 358 | 393  | 19113 | 1.766024 | 1        | 0.926342 | 66.54148 |

|        |                |                                            |   |          |          |                  |     |     |       |          |   |          |          |
|--------|----------------|--------------------------------------------|---|----------|----------|------------------|-----|-----|-------|----------|---|----------|----------|
| yellow | UP_SEQ_FEATURE | domain:TSP N-terminal                      | 3 | 0.659341 | 0.068035 | ENSG00000169436, | 358 | 23  | 19113 | 6.963687 | 1 | 0.924249 | 67.43018 |
| yellow | UP_SEQ_FEATURE | domain:TIR                                 | 3 | 0.659341 | 0.073331 | ENSG00000115607, | 358 | 24  | 19113 | 6.673534 | 1 | 0.932527 | 70.25523 |
| yellow | UP_SEQ_FEATURE | repeat:TNFR-Cys 2                          | 3 | 0.659341 | 0.078755 | ENSG00000186827, | 358 | 25  | 19113 | 6.406592 | 1 | 0.939805 | 72.90912 |
| yellow | UP_SEQ_FEATURE | repeat:TNFR-Cys 1                          | 3 | 0.659341 | 0.078755 | ENSG00000186827, | 358 | 25  | 19113 | 6.406592 | 1 | 0.939805 | 72.90912 |
| yellow | UP_SEQ_FEATURE | domain:CTCK                                | 3 | 0.659341 | 0.078755 | ENSG00000198788, | 358 | 25  | 19113 | 6.406592 | 1 | 0.939805 | 72.90912 |
| yellow | UP_SEQ_FEATURE | zinc finger region:C2H2-type 1; degenerate | 6 | 1.318681 | 0.07878  | ENSG00000175322, | 358 | 122 | 19113 | 2.625653 | 1 | 0.934339 | 72.92087 |
| yellow | UP_SEQ_FEATURE | DNA-binding region:Basic motif             | 7 | 1.538462 | 0.081886 | ENSG00000113196, | 358 | 161 | 19113 | 2.321229 | 1 | 0.936035 | 74.33848 |

**Supplemental Table 4. Cytochrome P450 gene symbols and major functions.**

| gene_name | id              | GENE_DESC                                              | P-val       | Functions                                      |
|-----------|-----------------|--------------------------------------------------------|-------------|------------------------------------------------|
| CYP39A1   | ENSG00000146233 | cytochrome P450, family 39, subfamily A, polypeptide 1 | 3.55E-11    | 7-alpha hydroxylation of 24-hydroxycholesterol |
| CYP26A1   | ENSG00000095596 | cytochrome P450, family 26, subfamily A, polypeptide 1 | 6.14E-08    | retinoic acid hydroxylase                      |
| CYP2C9    | ENSG00000138109 | cytochrome P450, family 2, subfamily C, polypeptide 9  | 7.46E-08    | drug and steroid metabolism                    |
| CYP2C18   | ENSG00000108242 | cytochrome P450, family 2, subfamily C, polypeptide 18 | 9.41E-06    | drug and steroid metabolism                    |
| CYP3A7    | ENSG00000160870 | cytochrome P450, family 3, subfamily A, polypeptide 7  | 9.95E-05    | drug and steroid metabolism                    |
| CYP27A1   | ENSG00000135929 | cytochrome P450, family 27, subfamily A, polypeptide 1 | 0.000547696 | bile acid biosynthesis                         |
| CYP2F1    | ENSG00000197446 | cytochrome P450, family 2, subfamily F, polypeptide 1  | 0.001219271 | drug and steroid metabolism                    |
